# Supplementary material for: Survival-related genes are diversified across cancers but generally enriched in cancer hallmark pathways
Source: BMC Genomics. 2022 May 4;22(Suppl 5):918. doi: 10.1186/s12864-022-08581-x (PMC9066720; doi:10.1186/s12864-022-08581-x)
Supplement: Supplementary file 2 — Additional file 2. Pathway enrichment results for survival-related genes. Enriched pathways for survival-related genes identified in different cancer types were listed in the excel file. [file 12864_2022_8581_MOESM2_ESM.xlsx]

## Sheet: Description
Additional file 2 Sheet 1 (pathway_Cox regression) and Sheet 2 (pathway_logrank test) list all enriched pathway with FDR (p.adjust) < 0.05 by clusterProfiler. Sheet 3 (manual group_Cox regression) and Sheet 4 (manual group_logrank test) list all pathways with FDR < 0.001. Column "select" indicates the pathways that are displayed in the heatmap (Fig. 3, Fig, 4 in the paper). Column "manual group" …

## Sheet: 1_pathway_Cox regression
Cancer	ID	Description	GeneRatio	BgRatio	pvalue	p.adjust	qvalue	geneID	Count
ACC	GO:0008380	RNA splicing	268/5696	380/12611	3.13745e-24	6.01135e-21	5.36779e-21	988/1195/1196/1198/1207/1477/1479/1653/1659/1660/1665/1859/1994/2081/2483/2521/2962/2963/3178/3181/3183/3184/3185/3189/3190/3191/3192/3303/3312/4670/4686/4809/4841/4858/4904/5093/5094/5295/5411/5430/5433/5434/5435/5436/5437/5438/5441/5511/5518/5725/5936/6100/6207/6231/6421/6426/6427/6428/6429/6431/6432/6433/6434/6607/6625/6626/6627/6628/6631/6632/6633/6634/6635/6636/6637/6651/6732/6830/6936/7072/…	268
ACC	GO:0006397	mRNA processing	300/5696	438/12611	1.0575e-23	1.01309e-20	9.0463e-21	104/580/891/988/1025/1207/1477/1479/1653/1659/1660/1665/1859/1994/2068/2071/2081/2483/2521/2926/2962/2963/2965/2968/3178/3181/3183/3184/3185/3189/3190/3191/3192/3297/3312/4331/4670/4686/4809/4841/4858/4904/5093/5094/5411/5430/5433/5434/5435/5436/5437/5438/5441/5511/5725/5930/5936/6294/6421/6426/6427/6428/6429/6431/6432/6433/6434/6607/6625/6626/6627/6628/6631/6632/6633/6634/6635/6636/6637/6651/673…	300
ACC	GO:0006402	mRNA catabolic process	227/5696	315/12611	1.16918e-22	9.60066e-20	8.57283e-20	472/678/1432/1660/1797/1869/1981/1994/2081/2475/3183/3184/3192/3303/3304/3312/3315/3646/3921/4292/4343/4670/4686/4736/4848/4849/4904/5394/5433/5436/5518/5520/5578/5682/5684/5685/5686/5687/5690/5691/5693/5695/5700/5704/5706/5707/5708/5709/5711/5715/5717/5718/5719/5721/5976/6093/6122/6124/6125/6128/6129/6130/6132/6134/6135/6136/6137/6138/6139/6141/6142/6143/6144/6146/6147/6152/6154/6155/6156/6157/6…	227
ACC	GO:0006281	DNA repair	314/5696	472/12611	1.3895e-21	9.98352e-19	8.91471e-19	25/86/142/472/545/580/641/672/675/983/988/1017/1025/1032/1111/1137/1454/1642/1647/1653/1660/1663/1763/2033/2067/2068/2071/2073/2074/2140/2176/2177/2178/2189/2237/2305/2521/2547/2873/2956/2965/2968/3014/3146/3148/3150/3159/3297/3508/3978/3980/4171/4172/4173/4174/4175/4176/4221/4287/4292/4331/4361/4436/4521/4595/4796/4798/4841/4862/4913/5111/5378/5379/5383/5387/5395/5423/5424/5425/5426/5427/5428/54…	314
ACC	GO:0006401	RNA catabolic process	240/5696	344/12611	8.2846e-21	4.9923e-18	4.45784e-18	472/678/1432/1660/1736/1763/1797/1869/1981/1994/2081/2237/2475/3183/3184/3192/3303/3304/3312/3315/3646/3669/3921/4292/4343/4670/4686/4736/4848/4849/4904/5394/5433/5436/5511/5518/5520/5578/5682/5684/5685/5686/5687/5690/5691/5693/5695/5700/5704/5706/5707/5708/5709/5711/5715/5717/5718/5719/5721/5976/6093/6122/6124/6125/6128/6129/6130/6132/6134/6135/6136/6137/6138/6139/6141/6142/6143/6144/6146/6147/6…	240
ACC	GO:0006260	DNA replication	179/5696	240/12611	8.68529e-21	4.9923e-18	4.45784e-18	466/472/545/580/604/641/672/675/890/898/983/990/997/1017/1025/1111/1602/1660/1663/1763/1854/1877/2237/2735/2736/2956/3159/3265/3508/3978/3980/4171/4172/4173/4174/4175/4176/4361/4673/4678/4774/4784/4796/4998/4999/5000/5001/5111/5423/5424/5425/5426/5427/5428/5429/5518/5557/5558/5810/5879/5883/5888/5928/5930/5932/5965/5976/5980/5982/5983/5984/5985/6117/6118/6119/6240/6241/6418/6749/7013/7014/7126/71…	179
ACC	GO:0000375	RNA splicing, via transesterification reactions	212/5696	299/12611	7.63878e-20	3.99161e-17	3.56428e-17	988/1207/1477/1479/1653/1659/1660/1665/1859/1994/2483/2521/2962/2963/3178/3181/3183/3184/3185/3189/3190/3191/3192/3312/4670/4686/4809/4858/4904/5093/5094/5411/5430/5433/5434/5435/5436/5437/5438/5441/5725/5936/6421/6426/6427/6428/6429/6431/6432/6433/6434/6607/6625/6626/6627/6628/6631/6632/6633/6634/6635/6636/6637/6651/6732/6936/7072/7307/7375/7536/7919/8106/8175/8189/8241/8449/8487/8559/8570/8683/…	212
ACC	GO:0071826	ribonucleoprotein complex subunit organization	136/5696	173/12611	1.37561e-19	6.58916e-17	5.88374e-17	472/545/1207/1653/1659/1660/1968/1975/3646/3692/3799/3831/3921/4686/4809/4839/5433/5822/6122/6125/6128/6134/6135/6136/6147/6152/6169/6175/6193/6204/6209/6223/6426/6431/6433/6607/6628/6631/6632/6633/6634/6635/6636/6637/6732/6880/6895/6936/7375/7415/7458/7536/7919/8175/8487/8559/8562/8607/8661/8662/8664/8665/8666/8667/8669/8683/8894/9092/9129/9326/9416/9733/10181/10291/10419/10421/10480/10594/10658…	136
ACC	GO:0006614	SRP-dependent cotranslational protein targeting to membrane	81/5696	90/12611	2.94223e-19	1.18345e-16	1.05676e-16	3921/4736/6122/6124/6125/6128/6129/6130/6132/6134/6135/6136/6137/6138/6139/6141/6142/6143/6144/6146/6147/6152/6154/6155/6156/6157/6158/6159/6160/6161/6165/6167/6168/6169/6171/6175/6176/6181/6187/6188/6189/6191/6193/6194/6201/6202/6203/6204/6205/6206/6207/6209/6210/6217/6218/6222/6223/6224/6227/6229/6230/6231/6233/6235/6726/6728/6729/6730/6734/6747/7311/9045/9349/9697/11224/11231/23521/25873/29927…	81
ACC	GO:0000377	RNA splicing, via transesterification reactions with bulged adenosine as nucleophile	209/5696	296/12611	3.08834e-19	1.18345e-16	1.05676e-16	988/1207/1477/1479/1653/1659/1660/1665/1859/1994/2483/2521/2962/2963/3178/3181/3183/3184/3185/3189/3190/3191/3192/3312/4670/4686/4809/4858/4904/5093/5094/5411/5430/5433/5434/5435/5436/5437/5438/5441/5725/5936/6421/6426/6427/6428/6429/6431/6432/6433/6434/6607/6625/6626/6627/6628/6631/6632/6633/6634/6635/6636/6637/6651/6732/6936/7072/7307/7375/7536/7919/8106/8175/8189/8241/8449/8487/8559/8683/8896/…	209
ACC	GO:0000398	mRNA splicing, via spliceosome	209/5696	296/12611	3.08834e-19	1.18345e-16	1.05676e-16	988/1207/1477/1479/1653/1659/1660/1665/1859/1994/2483/2521/2962/2963/3178/3181/3183/3184/3185/3189/3190/3191/3192/3312/4670/4686/4809/4858/4904/5093/5094/5411/5430/5433/5434/5435/5436/5437/5438/5441/5725/5936/6421/6426/6427/6428/6429/6431/6432/6433/6434/6607/6625/6626/6627/6628/6631/6632/6633/6634/6635/6636/6637/6651/6732/6936/7072/7307/7375/7536/7919/8106/8175/8189/8241/8449/8487/8559/8683/8896/…	209
ACC	GO:0022618	ribonucleoprotein complex assembly	131/5696	167/12611	9.0839e-19	3.07143e-16	2.74261e-16	472/545/1207/1653/1660/1968/1975/3646/3692/3921/4686/4809/4839/5433/5822/6122/6125/6128/6134/6135/6136/6147/6152/6169/6175/6193/6204/6209/6223/6426/6431/6433/6607/6628/6631/6632/6633/6634/6635/6636/6637/6732/6880/6895/6936/7375/7458/7536/7919/8175/8487/8559/8562/8607/8661/8662/8664/8665/8666/8667/8669/8683/8894/9092/9129/9326/9416/9733/10181/10291/10419/10421/10480/10594/10658/10728/10772/10856/1…	131
ACC	GO:0006613	cotranslational protein targeting to membrane	83/5696	94/12611	1.79338e-18	5.72687e-16	5.11376e-16	3921/4736/6122/6124/6125/6128/6129/6130/6132/6134/6135/6136/6137/6138/6139/6141/6142/6143/6144/6146/6147/6152/6154/6155/6156/6157/6158/6159/6160/6161/6165/6167/6168/6169/6171/6175/6176/6181/6187/6188/6189/6191/6193/6194/6201/6202/6203/6204/6205/6206/6207/6209/6210/6217/6218/6222/6223/6224/6227/6229/6230/6231/6233/6235/6726/6728/6729/6730/6734/6745/6746/6747/7311/9045/9349/9697/11224/11231/23521/2…	83
ACC	GO:0070972	protein localization to endoplasmic reticulum	107/5696	130/12611	1.96513e-18	5.94504e-16	5.30858e-16	439/2901/3309/3638/3921/4736/5372/5373/6122/6124/6125/6128/6129/6130/6132/6134/6135/6136/6137/6138/6139/6141/6142/6143/6144/6146/6147/6152/6154/6155/6156/6157/6158/6159/6160/6161/6165/6167/6168/6169/6171/6175/6176/6181/6187/6188/6189/6191/6193/6194/6201/6202/6203/6204/6205/6206/6207/6209/6210/6217/6218/6222/6223/6224/6227/6229/6230/6231/6233/6235/6726/6728/6729/6730/6734/6747/7311/8729/8733/9045/…	107
ACC	GO:0045047	protein targeting to ER	89/5696	103/12611	2.49326e-18	7.16562e-16	6.39848e-16	439/3309/3921/4736/5372/5373/6122/6124/6125/6128/6129/6130/6132/6134/6135/6136/6137/6138/6139/6141/6142/6143/6144/6146/6147/6152/6154/6155/6156/6157/6158/6159/6160/6161/6165/6167/6168/6169/6171/6175/6176/6181/6187/6188/6189/6191/6193/6194/6201/6202/6203/6204/6205/6206/6207/6209/6210/6217/6218/6222/6223/6224/6227/6229/6230/6231/6233/6235/6726/6728/6729/6730/6734/6747/7311/9045/9349/9697/9789/11224…	89
ACC	GO:0071103	DNA conformation change	197/5696	279/12611	3.32844e-18	9.11042e-16	8.13508e-16	25/142/641/891/983/1058/1106/1107/1616/1642/1653/1660/1663/1677/1763/1786/1788/2068/2071/2074/2491/2547/2852/2963/2965/2968/3005/3009/3014/3020/3021/3070/3146/3148/3149/3159/3181/3508/4152/4171/4172/4173/4174/4175/4176/4331/4361/4673/4678/5253/5887/5888/5928/5965/5982/5983/5984/5985/6046/6117/6233/6418/6662/6732/6832/6839/7153/7155/7156/7175/7290/7311/7316/7486/7507/7520/8091/8208/8260/8318/8340/…	197
ACC	GO:0072599	establishment of protein localization to endoplasmic reticulum	91/5696	107/12611	9.77576e-18	2.24764e-15	2.00701e-15	439/3309/3921/4736/5372/5373/6122/6124/6125/6128/6129/6130/6132/6134/6135/6136/6137/6138/6139/6141/6142/6143/6144/6146/6147/6152/6154/6155/6156/6157/6158/6159/6160/6161/6165/6167/6168/6169/6171/6175/6176/6181/6187/6188/6189/6191/6193/6194/6201/6202/6203/6204/6205/6206/6207/6209/6210/6217/6218/6222/6223/6224/6227/6229/6230/6231/6233/6235/6726/6728/6729/6730/6734/6747/7311/9045/9349/9697/9789/11224…	91
ACC	GO:1901990	regulation of mitotic cell cycle phase transition	243/5696	363/12611	1.86902e-17	3.97894e-15	3.55296e-15	472/581/595/637/641/672/678/699/701/835/891/894/898/983/989/990/991/993/994/995/996/1017/1021/1032/1062/1063/1112/1263/1454/1639/1642/1647/1778/1781/1869/1874/1981/2033/2068/2071/2146/2810/3161/3275/3276/3398/4085/4194/4361/4582/4751/4848/4849/4957/4998/5087/5111/5116/5310/5325/5347/5518/5577/5591/5682/5684/5685/5686/5687/5690/5691/5693/5695/5700/5704/5706/5707/5708/5709/5711/5715/5717/5718/5719/…	243
ACC	GO:0000280	nuclear division	228/5696	337/12611	2.79805e-17	5.74401e-15	5.12907e-15	332/387/472/652/655/675/699/701/811/891/898/990/991/994/995/996/1062/1063/1104/1111/1164/1613/1950/2177/2801/2827/3192/3297/3303/3304/3479/3619/3643/3796/3832/3833/3837/3976/4085/4288/4292/4361/4603/4605/4733/4751/4926/5300/5347/5518/5719/5810/5888/5889/5890/5892/5901/5902/6152/6683/6790/7013/7153/7155/7175/7272/7290/7474/7517/7756/8243/8260/8379/8438/8452/8658/8766/8877/9055/9088/9126/9134/9150/…	228
ACC	GO:0000956	nuclear-transcribed mRNA catabolic process	142/5696	189/12611	3.1125e-17	5.96354e-15	5.3251e-15	472/678/1797/1981/3646/3921/4292/4686/4736/4848/4849/5394/5433/5436/5518/5520/5976/6122/6124/6125/6128/6129/6130/6132/6134/6135/6136/6137/6138/6139/6141/6142/6143/6144/6146/6147/6152/6154/6155/6156/6157/6158/6159/6160/6161/6165/6167/6168/6169/6171/6175/6176/6181/6187/6188/6189/6191/6193/6194/6201/6202/6203/6204/6205/6206/6207/6209/6210/6217/6218/6222/6223/6224/6227/6229/6230/6231/6233/6235/6741/7…	142
ACC	GO:0000184	nuclear-transcribed mRNA catabolic process, nonsense-mediated decay	93/5696	112/12611	1.09673e-16	1.97e-14	1.7591e-14	1981/3646/3921/4686/4736/5394/5518/5520/5976/6122/6124/6125/6128/6129/6130/6132/6134/6135/6136/6137/6138/6139/6141/6142/6143/6144/6146/6147/6152/6154/6155/6156/6157/6158/6159/6160/6161/6165/6167/6168/6169/6171/6175/6176/6181/6187/6188/6189/6191/6193/6194/6201/6202/6203/6204/6205/6206/6207/6209/6210/6217/6218/6222/6223/6224/6227/6229/6230/6231/6233/6235/7311/9045/9349/9704/9775/9811/9887/9939/1092…	93
ACC	GO:1903311	regulation of mRNA metabolic process	188/5696	272/12611	6.60312e-16	1.11632e-13	9.96806e-14	580/678/891/1025/1432/1660/1859/1869/1981/1994/2475/3178/3181/3183/3184/3190/3191/3192/3297/3303/3312/3315/4343/4670/4686/4904/5436/5578/5682/5684/5685/5686/5687/5690/5691/5693/5695/5700/5704/5706/5707/5708/5709/5711/5715/5717/5718/5719/5721/5725/5936/5976/6093/6233/6294/6418/6426/6427/6428/6429/6431/6432/6433/6434/6556/6625/6626/6651/6732/6829/6830/7072/7311/7316/7431/7514/7534/7832/7936/8021/80…	188
ACC	GO:0048285	organelle fission	240/5696	372/12611	2.02395e-14	3.02265e-12	2.69905e-12	332/387/472/652/655/664/675/699/701/811/891/898/990/991/994/995/996/1062/1063/1104/1111/1164/1613/1950/2177/2801/2827/3192/3297/3303/3304/3479/3619/3643/3796/3832/3833/3837/3976/4085/4288/4292/4361/4603/4605/4733/4751/4926/5071/5300/5347/5518/5719/5810/5888/5889/5890/5892/5901/5902/6152/6683/6790/7013/7153/7155/7175/7272/7290/7474/7517/7756/8243/8260/8379/8438/8452/8658/8766/8800/8877/9055/9088/9…	240
ACC	GO:0006261	DNA-dependent DNA replication	108/5696	141/12611	2.05086e-14	3.02265e-12	2.69905e-12	604/641/675/898/990/997/1017/1025/1602/1663/1763/2237/2956/3159/3978/3980/4171/4172/4173/4174/4175/4176/4361/4796/4998/4999/5000/5001/5111/5423/5424/5425/5426/5427/5428/5557/5558/5888/5965/5976/5980/5982/5983/5984/5985/6117/6118/6119/7013/7014/7486/7884/8243/8317/8318/8882/8914/9126/9134/9401/9837/9984/10189/10714/10926/11169/11177/11200/11232/11284/23594/23595/23649/26271/29980/50485/51053/51659…	108
ACC	GO:0000082	G1/S transition of mitotic cell cycle	150/5696	212/12611	2.7102e-14	3.79957e-12	3.39279e-12	472/581/586/595/637/835/891/894/898/983/989/990/993/995/997/1017/1021/1032/1033/1104/1263/1647/1719/1869/1874/1876/1978/1981/2033/2146/2810/3275/3276/3398/3688/4149/4171/4172/4173/4174/4175/4176/4194/4331/4582/4609/4678/4848/4849/4863/4998/4999/5000/5001/5111/5310/5325/5426/5427/5471/5537/5557/5558/5591/5721/5728/5932/6117/6118/6119/6154/6194/6241/6502/6790/6868/7015/7027/7029/7298/7465/7832/8065…	150
ACC	GO:0006405	RNA export from nucleus	97/5696	124/12611	4.19108e-14	5.47507e-12	4.88892e-12	1660/3178/3181/3267/3692/4686/4927/5433/5901/5903/5976/6059/6209/6396/6426/6427/6428/6429/6431/6432/6741/6830/7175/7248/7307/7514/7884/7919/8021/8106/8189/8480/8563/8683/8888/9295/9631/9688/9775/9785/9818/9877/9887/9939/9972/9984/10189/10212/10250/10482/10657/10762/10898/10921/11052/11097/11260/11338/22794/22916/23165/23225/23279/23381/23511/23636/26019/26097/26993/29072/29890/29894/51042/51068/5…	97
ACC	GO:0050657	nucleic acid transport	125/5696	172/12611	1.69457e-13	1.98783e-11	1.77502e-11	1660/3178/3181/3192/3267/3297/3692/3800/4641/4686/4927/5433/5901/5903/5976/6059/6209/6311/6396/6421/6426/6427/6428/6429/6431/6432/6741/6830/7014/7175/7248/7307/7514/7884/7919/8021/8106/8189/8480/8563/8570/8658/8683/8888/9284/9295/9631/9688/9775/9785/9793/9804/9818/9877/9887/9939/9972/9984/10128/10189/10204/10212/10250/10482/10642/10644/10657/10762/10898/10921/11052/11097/11260/11338/22794/22916/2…	125
ACC	GO:0051168	nuclear export	126/5696	174/12611	2.09758e-13	2.36409e-11	2.111e-11	580/811/1434/1660/2010/2810/2932/3178/3181/3267/3429/3692/4686/4927/5310/5433/5784/5901/5903/5905/5976/6059/6209/6310/6396/6426/6427/6428/6429/6431/6432/6741/6830/6934/7175/7248/7295/7307/7514/7884/7919/8021/8106/8189/8480/8498/8536/8563/8683/8888/9147/9295/9631/9688/9775/9785/9818/9877/9887/9939/9972/9984/10189/10204/10212/10250/10482/10541/10657/10762/10898/10921/11052/11097/11260/11261/11338/2…	126
ACC	GO:0042254	ribosome biogenesis	177/5696	265/12611	6.29887e-13	6.8313e-11	6.09995e-11	14/705/1662/1736/2091/2483/3669/3692/3921/4736/4809/4839/4927/4931/5036/5394/5728/5822/5901/6059/6122/6125/6128/6129/6130/6134/6135/6136/6147/6152/6154/6155/6165/6169/6175/6187/6193/6194/6201/6202/6203/6204/6209/6217/6218/6223/6227/6229/6839/7248/7514/8451/8568/8780/8886/9045/9092/9136/9188/9221/9277/9326/9775/9790/9816/10153/10199/10248/10360/10514/10521/10528/10556/10557/10799/10885/11056/11137…	177
ACC	GO:0071824	protein-DNA complex subunit organization	143/5696	205/12611	6.57989e-13	7.00392e-11	6.2541e-11	142/1058/1062/1063/1385/1616/1642/1810/2068/2071/2073/2491/2958/2960/2965/2968/2972/3005/3009/3014/3020/3021/3070/3146/3148/3159/4171/4172/4173/4174/4175/4176/4331/4609/4673/4678/5704/5706/5757/5887/5888/5928/6046/6117/6118/6119/6233/6418/6597/6599/6602/6662/6666/6830/6882/6908/7013/7290/7311/7316/7480/7507/8208/8289/8318/8340/8341/8344/8347/8348/8351/8352/8353/8355/8357/8363/8365/8451/8520/8554/…	143
ACC	GO:1901991	negative regulation of mitotic cell cycle phase transition	140/5696	200/12611	7.50594e-13	7.84439e-11	7.00458e-11	472/581/595/641/672/678/699/701/835/891/983/989/990/991/995/1017/1021/1032/1063/1112/1263/1647/1869/1874/2033/2146/2810/3275/3276/4085/4194/4361/4582/4848/4849/4998/5111/5325/5347/5591/5682/5684/5685/5686/5687/5690/5691/5693/5695/5700/5704/5706/5707/5708/5709/5711/5715/5717/5718/5719/5721/5728/6118/6154/6790/7027/7029/7175/7272/7465/7517/7756/7832/8091/8379/8737/9125/9183/9184/9212/9314/9319/9344…	140
ACC	GO:0006611	protein export from nucleus	117/5696	161/12611	1.01828e-12	1.04519e-10	9.33298e-11	580/811/1434/2010/2810/2932/3181/3267/3429/3692/4686/4927/5310/5433/5784/5901/5903/5905/5976/6059/6209/6396/6426/6427/6428/6429/6431/6432/6741/6830/6934/7175/7248/7295/7307/7514/7884/7919/8021/8106/8189/8480/8498/8536/8563/8683/8888/9295/9631/9688/9775/9785/9818/9877/9887/9939/9972/9984/10189/10204/10212/10250/10482/10541/10762/10898/10921/11097/11260/11261/11338/22794/22916/23165/23214/23225/232…	117
ACC	GO:0065004	protein-DNA complex assembly	126/5696	177/12611	1.58308e-12	1.59641e-10	1.4255e-10	142/1058/1062/1063/1385/1616/1642/1810/2068/2071/2073/2491/2958/2965/2968/2972/3005/3009/3014/3020/3021/3070/3146/3148/4171/4172/4173/4174/4175/4176/4331/4673/4678/5704/5706/5887/5888/5928/6046/6117/6118/6119/6233/6418/6597/6662/6666/6882/6908/7013/7290/7311/7316/7480/7507/8208/8318/8340/8341/8344/8347/8348/8351/8352/8353/8355/8357/8363/8365/8451/8520/8554/8607/8970/8971/9014/9328/9330/9519/9555/…	126
ACC	GO:0006612	protein targeting to membrane	123/5696	172/12611	1.74008e-12	1.72448e-10	1.53986e-10	134/208/288/439/784/2039/2040/2664/3208/3265/3309/3921/4641/4736/5174/5584/6122/6124/6125/6128/6129/6130/6132/6134/6135/6136/6137/6138/6139/6141/6142/6143/6144/6146/6147/6152/6154/6155/6156/6157/6158/6159/6160/6161/6165/6167/6168/6169/6171/6175/6176/6181/6187/6188/6189/6191/6193/6194/6201/6202/6203/6204/6205/6206/6207/6209/6210/6217/6218/6222/6223/6224/6227/6229/6230/6231/6233/6235/6726/6728/6729…	123
ACC	GO:0006406	mRNA export from nucleus	80/5696	101/12611	2.1734e-12	2.08211e-10	1.85921e-10	3181/3267/4686/4927/5433/5903/5976/6396/6426/6427/6428/6429/6431/6432/6830/7175/7307/7884/7919/8021/8106/8189/8480/8563/8683/8888/9295/9631/9688/9775/9785/9818/9877/9887/9939/9972/9984/10189/10212/10250/10482/10762/10898/10921/11097/11338/22794/22916/23165/23225/23279/23381/23511/23636/26019/26097/26993/29072/29890/29894/51692/53371/53981/54890/55339/55706/55746/55795/55998/57122/79902/80145/8192…	80
ACC	GO:0071427	mRNA-containing ribonucleoprotein complex export from nucleus	80/5696	101/12611	2.1734e-12	2.08211e-10	1.85921e-10	3181/3267/4686/4927/5433/5903/5976/6396/6426/6427/6428/6429/6431/6432/6830/7175/7307/7884/7919/8021/8106/8189/8480/8563/8683/8888/9295/9631/9688/9775/9785/9818/9877/9887/9939/9972/9984/10189/10212/10250/10482/10762/10898/10921/11097/11338/22794/22916/23165/23225/23279/23381/23511/23636/26019/26097/26993/29072/29890/29894/51692/53371/53981/54890/55339/55706/55746/55795/55998/57122/79902/80145/8192…	80
ACC	GO:0040029	regulation of gene expression, epigenetic	173/5696	261/12611	3.14845e-12	2.92134e-10	2.60858e-10	652/672/1111/1499/1660/1786/1788/1981/1994/2033/2074/2146/2648/3005/3009/3020/3021/3146/3159/3181/3192/3692/3720/4087/4088/4343/4524/4641/4927/5252/5394/5430/5433/5434/5435/5436/5437/5438/5441/5460/5511/5604/5605/5901/5903/5926/5928/5936/5976/5987/6396/6602/6895/6908/6996/7015/7022/7175/7247/7257/7290/7703/7913/8021/8087/8289/8318/8351/8352/8353/8355/8357/8363/8365/8480/8520/8575/8726/8737/8971/9…	173
ACC	GO:0051028	mRNA transport	100/5696	134/12611	3.15106e-12	2.92134e-10	2.60858e-10	1660/3178/3181/3267/3297/3800/4641/4686/4927/5433/5903/5976/6396/6426/6427/6428/6429/6431/6432/6830/7175/7307/7514/7884/7919/8021/8106/8189/8480/8563/8570/8658/8683/8888/9284/9295/9631/9688/9775/9785/9818/9877/9887/9939/9972/9984/10128/10189/10204/10212/10250/10482/10642/10644/10762/10898/10921/11097/11338/22794/22916/23165/23225/23279/23299/23381/23511/23636/25909/26019/26097/26993/29072/29890/2…	100
ACC	GO:0033044	regulation of chromosome organization	192/5696	296/12611	4.13931e-12	3.71762e-10	3.31962e-10	142/472/545/604/672/699/701/891/908/990/991/996/1025/1062/1063/1111/1499/1663/1736/1786/2067/2237/2625/2648/3005/3009/3020/3021/3159/3178/3181/3183/3184/3192/3670/3720/3976/4085/4089/4171/4288/4297/4302/4331/4361/4524/4582/4609/4751/4926/5252/5253/5347/5394/5514/5570/5587/5594/5609/5927/5976/6418/6421/6591/6830/6871/7013/7014/7153/7175/7272/7290/7422/7515/7517/7520/7756/7936/8260/8313/8318/8379/8…	192
ACC	GO:0015931	nucleobase-containing compound transport	144/5696	210/12611	4.4182e-12	3.90705e-10	3.48877e-10	134/1660/2030/3178/3181/3192/3267/3297/3692/3800/4641/4686/4927/5027/5433/5901/5903/5976/6059/6209/6311/6396/6421/6426/6427/6428/6429/6431/6432/6741/6830/7014/7175/7248/7307/7514/7884/7919/8021/8106/8189/8480/8563/8570/8658/8683/8737/8888/9284/9295/9631/9688/9775/9785/9793/9804/9818/9877/9887/9939/9972/9984/10128/10189/10204/10212/10237/10250/10478/10482/10559/10642/10644/10657/10762/10898/10921/…	144
ACC	GO:0006323	DNA packaging	121/5696	171/12611	8.49124e-12	7.1776e-10	6.40918e-10	891/983/1058/1616/1677/1786/1788/2491/2852/3005/3009/3014/3020/3021/3070/3148/3159/4152/4171/4673/4678/5253/5928/6046/6418/6662/6732/6839/7153/7175/7290/8091/8208/8260/8340/8341/8344/8347/8348/8351/8352/8353/8355/8357/8363/8365/8520/8607/8815/8932/8970/8971/9131/9555/9733/9869/9918/10036/10051/10155/10270/10541/10592/10664/11176/22880/22985/23063/23198/23310/23347/23378/23397/23523/25842/26155/26…	121
ACC	GO:1902749	regulation of cell cycle G2/M phase transition	127/5696	184/12611	4.05466e-11	3.19262e-09	2.85083e-09	472/595/641/672/891/983/990/993/994/995/1017/1063/1111/1112/1454/1639/1778/1781/3161/4361/4751/4957/4998/5087/5116/5347/5518/5577/5682/5684/5685/5686/5687/5690/5691/5693/5695/5700/5704/5706/5707/5708/5709/5711/5715/5717/5718/5719/5721/5889/5890/6790/7480/7840/8091/8317/8766/9212/9344/9525/9555/9702/9738/9793/9814/9861/9928/9978/10121/10197/10213/10383/10540/10733/10806/11064/11073/11116/11258/228…	127
ACC	GO:0010389	regulation of G2/M transition of mitotic cell cycle	117/5696	169/12611	1.75699e-10	1.30323e-08	1.16371e-08	472/595/641/672/891/983/990/993/994/995/1017/1063/1112/1454/1639/1778/1781/3161/4361/4751/4957/4998/5087/5116/5347/5518/5577/5682/5684/5685/5686/5687/5690/5691/5693/5695/5700/5704/5706/5707/5708/5709/5711/5715/5717/5718/5719/5721/5889/5890/6790/7480/7840/8091/8317/8766/9212/9344/9525/9702/9738/9793/9814/9861/9928/9978/10121/10197/10213/10383/10540/10733/10806/11064/11073/11116/11258/22897/22919/2…	117
ACC	GO:0031123	RNA 3'-end processing	92/5696	126/12611	1.76847e-10	1.30323e-08	1.16371e-08	580/891/1025/1477/1479/1736/2091/2926/3297/4686/5394/5433/6227/6426/6427/6428/6429/6431/6432/6626/6741/6829/6832/7307/7884/7919/7936/8106/8189/8563/8683/9295/9646/9775/9785/9810/9877/9939/9984/10189/10212/10250/10898/10914/10921/11051/11052/11338/11340/22794/22828/22916/23016/23404/25888/25896/25962/26097/26173/26512/26986/29894/51010/51585/51692/53981/54512/54623/55149/55339/55656/56254/58490/64…	92
ACC	GO:0000086	G2/M transition of mitotic cell cycle	144/5696	217/12611	1.84224e-10	1.3404e-08	1.1969e-08	472/595/641/672/808/890/891/983/990/993/994/995/1017/1063/1112/1263/1454/1639/1778/1781/2305/3161/4331/4361/4751/4957/4998/5087/5116/5218/5347/5500/5518/5520/5577/5682/5684/5685/5686/5687/5690/5691/5693/5695/5700/5704/5706/5707/5708/5709/5711/5715/5717/5718/5719/5721/5889/5890/6502/6790/6873/7465/7480/7840/8091/8317/8766/9088/9113/9133/9212/9344/9525/9702/9738/9793/9814/9833/9861/9928/9978/10121/…	144
ACC	GO:0006310	DNA recombination	152/5696	232/12611	2.42282e-10	1.71931e-08	1.53524e-08	86/142/472/604/641/672/675/1111/1235/2021/2067/2068/2237/2521/2547/2956/3005/3009/3014/3146/3148/3149/3329/3508/3838/3980/4171/4172/4173/4174/4175/4176/4292/4361/4436/4796/4798/4841/5423/5531/5591/5888/5889/5890/5892/5932/5965/5980/6117/6118/6119/6421/6830/6832/6929/7011/7014/7037/7153/7155/7247/7292/7468/7486/7515/7517/7520/7528/8317/8318/8438/8607/8914/8971/9156/9319/9401/9466/9984/9985/10097/1…	152
ACC	GO:0006913	nucleocytoplasmic transport	184/5696	291/12611	2.82094e-10	1.97741e-08	1.76571e-08	406/580/652/754/811/1432/1434/1660/1894/2010/2737/2810/2932/3178/3181/3267/3429/3692/3837/3838/3839/3843/4088/4686/4927/5295/5310/5433/5469/5501/5514/5594/5663/5784/5901/5903/5905/5936/5976/6059/6209/6310/6396/6426/6427/6428/6429/6431/6432/6607/6608/6628/6632/6633/6634/6635/6636/6637/6741/6830/6934/7175/7248/7295/7307/7514/7884/7919/8021/8106/8125/8189/8480/8487/8498/8536/8563/8683/8720/8882/8888…	184
ACC	GO:0031124	mRNA 3'-end processing	71/5696	92/12611	3.35373e-10	2.32256e-08	2.07391e-08	580/891/1025/1477/1479/2926/3297/4686/5433/6426/6427/6428/6429/6431/6432/6626/6829/7307/7884/7919/7936/8106/8189/8563/8683/9295/9646/9775/9785/9810/9877/9939/9984/10189/10212/10250/10898/10914/10921/11051/11052/11338/22794/22828/22916/25888/25962/26097/26986/29894/51585/51692/53981/54623/55149/55339/56254/58490/64852/64895/79577/79869/79882/80145/80336/84271/84324/87178/123169/170506/199746	71
ACC	GO:0032200	telomere organization	102/5696	145/12611	6.27868e-10	4.19831e-08	3.74885e-08	142/472/545/641/675/898/908/1499/1736/1763/2067/2237/2547/3020/3021/3104/3178/3181/3183/3184/3192/4361/4609/4751/5111/5394/5424/5425/5426/5427/5514/5557/5558/5570/5591/5594/5609/5888/5889/5892/5976/5982/5983/5984/5985/6117/6118/6119/7011/7013/7014/7015/7486/7515/7517/7520/8351/8352/8353/8355/8357/8363/8365/8658/9134/9156/9212/9401/9887/9894/10574/10575/10576/10694/10714/10728/11284/22948/23137/23…	102
ACC	GO:0098781	ncRNA transcription	73/5696	96/12611	6.28139e-10	4.19831e-08	3.74885e-08	283/905/1025/1663/2475/2958/2960/2961/2962/2963/2972/2975/2976/4141/4686/4691/5430/5433/5434/5435/5436/5437/5438/5441/5451/6597/6617/6618/6619/6621/6667/6877/6880/6882/6908/7702/8178/8812/9014/9328/9329/9330/9555/10208/10360/10849/10927/11137/22916/25896/25926/26173/26512/29997/51547/51593/54973/55011/55656/55726/58490/64425/64768/65123/79664/79871/80237/80789/81556/84172/84365/84524/92105	73
ACC	GO:0016569	covalent chromatin modification	235/5696	391/12611	1.22742e-09	8.10941e-08	7.24123e-08	86/472/604/672/675/890/891/983/1017/1025/1111/1386/1499/1642/1786/1788/1810/2005/2033/2091/2140/2146/2625/2648/3009/3054/3066/3070/3141/3275/3276/3670/3717/3720/3976/4089/4152/4221/4297/4302/4524/4582/4591/5252/5253/5578/5585/5587/5926/5927/5929/6015/6018/6045/6314/6418/6421/6591/6790/6830/6839/6871/6877/6880/7324/7422/7443/7468/7703/7862/7936/8089/8091/8193/8242/8314/8464/8520/8607/8726/8819/888…	235
ACC	GO:0034470	ncRNA processing	204/5696	333/12611	1.65679e-09	1.07002e-07	9.5547e-08	705/1653/1662/1736/2091/2483/2926/3181/3669/4087/4088/4234/4736/4809/4839/4931/5036/5394/5822/6125/6129/6130/6135/6154/6155/6165/6187/6194/6201/6202/6203/6209/6217/6218/6223/6227/6229/6301/6741/6839/6894/6895/8568/8575/8780/8886/9045/9092/9097/9136/9188/9221/9277/9326/9692/9775/9790/10199/10248/10360/10521/10528/10556/10557/10785/10799/10885/10898/10940/11056/11224/11340/22894/22929/22984/23016/2…	204
ACC	GO:0016570	histone modification	228/5696	380/12611	2.68927e-09	1.69867e-07	1.51681e-07	86/472/604/672/675/890/891/983/1017/1025/1111/1386/1499/1642/1786/1810/2005/2033/2091/2140/2146/2625/2648/3009/3054/3066/3141/3275/3276/3670/3717/3720/3976/4089/4221/4297/4302/4524/4582/4591/5252/5253/5578/5585/5587/5926/5927/5929/6015/6018/6045/6314/6418/6421/6591/6790/6830/6839/6871/6877/6880/7324/7422/7443/7468/7703/7862/7936/8089/8091/8193/8242/8314/8464/8520/8607/8726/8819/8888/8986/9031/907…	228
ACC	GO:0006333	chromatin assembly or disassembly	106/5696	155/12611	3.72348e-09	2.32636e-07	2.07731e-07	1058/1107/1616/1786/1788/2491/3005/3009/3014/3020/3021/3070/3148/3159/4152/4171/4673/4678/5253/5928/6046/6418/6597/6599/6602/6662/6839/7175/7290/8091/8208/8289/8340/8341/8344/8347/8348/8351/8352/8353/8355/8357/8363/8365/8520/8607/8932/8970/8971/9031/9219/9555/9733/9869/9874/10036/10155/10541/10664/11011/11176/11198/22880/23347/23378/23523/25842/26155/29855/50809/51535/51773/53615/54069/54107/5462…	106
ACC	GO:0034660	ncRNA metabolic process	241/5696	406/12611	3.79895e-09	2.348e-07	2.09663e-07	705/833/1615/1653/1662/1736/2058/2091/2193/2483/2617/2926/3181/3265/3376/3669/4087/4088/4141/4234/4603/4677/4736/4809/4839/4931/5036/5394/5464/5822/5859/5901/5970/6125/6129/6130/6135/6154/6155/6165/6187/6194/6201/6202/6203/6209/6217/6218/6223/6227/6229/6301/6741/6839/6894/6895/6897/7965/8565/8568/8570/8575/8780/8886/9045/9092/9097/9136/9188/9221/9255/9277/9326/9692/9775/9790/10056/10199/10248/103…	241
ACC	GO:0018205	peptidyl-lysine modification	203/5696	334/12611	4.62137e-09	2.79617e-07	2.49682e-07	86/405/672/675/1111/1386/1491/1499/1786/1810/2033/2146/2625/2648/3009/3054/3066/3670/3720/3976/4016/4017/4089/4221/4297/4302/4582/4927/5252/5351/5447/5903/5905/5926/5929/5970/6018/6418/6591/6612/6613/6830/6839/6871/6877/6880/7175/7341/7468/7703/7862/7936/8021/8089/8193/8464/8480/8520/8535/8554/8607/8726/8888/8985/8986/9063/9070/9329/9555/9631/9646/9688/9757/9759/9818/9869/9913/9972/10054/10055/10…	203
ACC	GO:0050684	regulation of mRNA processing	85/5696	119/12611	5.15664e-09	3.08754e-07	2.75699e-07	580/891/1025/1660/1859/3178/3181/3190/3191/3192/3297/4686/5725/5936/6294/6426/6427/6428/6429/6431/6432/6433/6434/6625/6626/6651/6732/6829/6830/7072/7936/8106/8241/8683/9588/9589/9646/9667/9733/9810/9939/9967/10179/10181/10262/10521/10657/10658/10772/10898/10914/10921/10929/11051/11052/11338/22916/22938/23210/23543/25962/26528/27316/29890/29896/54623/55234/56254/57703/58517/64783/79171/79577/79811…	85
ACC	GO:2001251	negative regulation of chromosome organization	86/5696	121/12611	6.20534e-09	3.67715e-07	3.28348e-07	142/472/672/699/701/891/991/1063/1786/2067/3005/3009/3020/3021/3159/3178/3183/3192/3720/4085/4171/4302/4331/5252/5253/5347/5394/5927/6418/6830/7013/7014/7153/7175/7272/7515/7517/7520/7756/8260/8379/8658/8971/9183/9184/9212/9232/9319/9320/9555/9700/10403/10459/22823/23028/23063/23081/25842/25906/26155/26271/26277/29028/51143/51366/54454/54880/54908/55011/55226/55611/55755/55795/55818/56155/56848/5…	86
ACC	GO:0070646	protein modification by small protein removal	154/5696	243/12611	6.35426e-09	3.72697e-07	3.32796e-07	86/329/387/580/672/890/983/991/993/1861/2033/2625/2648/2873/3054/3607/4087/4088/4089/4194/4287/4609/4738/4798/5071/5423/5682/5684/5685/5686/5687/5690/5691/5693/5695/5700/5704/5706/5707/5708/5709/5711/5715/5717/5718/5719/5721/5728/5886/5887/6233/6314/6472/6478/6502/7046/7128/7186/7187/7311/7316/7347/7353/7375/7398/7415/7528/8237/8314/8464/8533/8607/8665/8724/8737/9097/9099/9100/9101/9146/9318/9733…	154
ACC	GO:0031497	chromatin assembly	94/5696	135/12611	6.80504e-09	3.95105e-07	3.52806e-07	1058/1616/1786/1788/2491/3005/3009/3014/3020/3021/3070/3148/3159/4152/4171/4673/4678/5253/5928/6046/6418/6662/6839/7175/7290/8091/8208/8340/8341/8344/8347/8348/8351/8352/8353/8355/8357/8363/8365/8520/8607/8932/8970/8971/9555/9733/9869/10036/10155/10541/10664/11176/22880/23347/23378/23523/25842/26155/29855/50809/51535/51773/53615/54069/54107/54623/55166/55320/55355/55723/55839/57082/57343/57673/64…	94
ACC	GO:0006364	rRNA processing	127/5696	195/12611	1.24252e-08	7.07131e-07	6.31427e-07	705/1662/1736/2091/2483/3669/4736/4809/4839/4931/5036/5394/5822/6125/6129/6130/6135/6154/6155/6165/6187/6194/6201/6202/6203/6209/6217/6218/6223/6227/6229/6839/8568/8780/8886/9045/9092/9136/9188/9221/9277/9326/9775/9790/10199/10248/10360/10521/10528/10556/10557/10799/10885/11056/11224/11340/22894/22984/23016/23076/23160/23246/23378/23404/23481/23560/25926/25983/26168/27043/27341/28987/29960/29997/…	127
ACC	GO:0006334	nucleosome assembly	68/5696	92/12611	1.84822e-08	1.04153e-06	9.30022e-07	1058/1616/2491/3005/3009/3014/3020/3021/3148/4171/4673/4678/5928/6046/6418/6662/7290/8208/8340/8341/8344/8347/8348/8351/8352/8353/8355/8357/8363/8365/8520/8607/8970/8971/9555/9733/10036/10541/23523/25842/29855/50809/51773/54069/54107/55166/55320/55355/55723/55839/57082/64105/64754/64946/79019/79172/79682/79711/80152/83743/85236/91687/144108/201254/387103/401541/440689/653604	68
ACC	GO:0006605	protein targeting	220/5696	371/12611	2.05256e-08	1.14545e-06	1.02282e-06	134/208/288/439/637/706/784/847/1384/1891/2039/2040/2664/2931/3208/3265/3309/3312/3329/3416/3417/3921/3998/4053/4641/4736/5071/5174/5192/5194/5195/5372/5373/5584/6122/6124/6125/6128/6129/6130/6132/6134/6135/6136/6137/6138/6139/6141/6142/6143/6144/6146/6147/6152/6154/6155/6156/6157/6158/6159/6160/6161/6165/6167/6168/6169/6171/6175/6176/6181/6187/6188/6189/6191/6193/6194/6201/6202/6203/6204/6205/62…	220
ACC	GO:0000723	telomere maintenance	94/5696	137/12611	2.18694e-08	1.20871e-06	1.0793e-06	142/472/545/641/675/898/908/1499/1736/1763/2067/2237/2547/3104/3178/3181/3183/3184/3192/4361/4609/4751/5111/5394/5424/5425/5426/5427/5514/5557/5558/5570/5591/5594/5609/5888/5889/5892/5976/5982/5983/5984/5985/6117/6118/6119/7011/7013/7014/7015/7486/7515/7517/7520/8363/8365/8658/9134/9156/9212/9401/9887/9894/10574/10575/10576/10694/10714/10728/11284/22948/23137/23381/23649/26277/26354/50485/54107/5…	94
ACC	GO:0034728	nucleosome organization	83/5696	118/12611	2.4734e-08	1.34124e-06	1.19765e-06	1058/1616/2491/3005/3009/3014/3020/3021/3148/3159/4171/4673/4678/5757/5928/6046/6418/6597/6599/6602/6662/6830/7290/8208/8289/8340/8341/8344/8347/8348/8351/8352/8353/8355/8357/8363/8365/8520/8607/8888/8970/8971/9555/9733/10036/10541/10664/11198/23198/23523/25842/29072/29855/50809/51773/54069/54107/54617/54623/55166/55320/55355/55723/55839/55929/57082/64105/64754/64946/79019/79172/79682/79711/80152…	83
ACC	GO:0061013	regulation of mRNA catabolic process	109/5696	164/12611	2.60248e-08	1.3851e-06	1.23681e-06	678/1432/1660/1869/1981/1994/2475/3183/3184/3192/3303/3312/3315/4343/4670/4904/5436/5578/5682/5684/5685/5686/5687/5690/5691/5693/5695/5700/5704/5706/5707/5708/5709/5711/5715/5717/5718/5719/5721/5976/6093/6233/6418/6556/7311/7316/7431/7514/7534/7832/8021/8087/8125/8241/8313/8531/8570/8761/9238/9475/9698/9704/9861/9967/10197/10213/10236/10492/10642/10644/10949/11340/22894/23016/23019/23034/23112/23…	109
ACC	GO:0044773	mitotic DNA damage checkpoint	65/5696	88/12611	3.97753e-08	2.05972e-06	1.83921e-06	472/581/595/641/835/891/983/995/1017/1112/1263/1386/1647/1869/1874/2033/2810/3276/4194/4361/4436/4582/4848/4849/5111/5325/5514/5591/5883/6118/6154/6790/7027/7029/7832/8091/9125/9344/9656/10498/10769/11200/23019/25904/26058/28984/29980/29997/51512/54962/55159/55367/55571/57060/57472/60561/63967/79733/80198/80279/84446/91603/144455/146956/246175	65
ACC	GO:1901796	regulation of signal transduction by p53 class mediator	105/5696	158/12611	4.71549e-08	2.39864e-06	2.14185e-06	472/545/580/624/641/672/754/972/1017/1107/1111/1263/1432/1460/1763/1859/2033/3066/3190/4194/4282/4361/4582/4839/5071/5300/5457/5564/5565/5600/5810/5883/5928/5932/5982/5983/5984/5985/6117/6118/6119/6125/6135/6154/6201/6591/6749/6790/6794/6873/6875/6877/6880/6882/6908/7156/7159/7161/7486/7862/8148/8445/8805/8851/9156/9212/9219/9349/10419/10614/10919/11073/11198/11200/22974/23028/23246/26155/29997/5…	105
ACC	GO:0016579	protein deubiquitination	144/5696	230/12611	6.06058e-08	3.05581e-06	2.72866e-06	86/329/387/580/672/890/983/991/993/2033/2625/2648/3054/3607/4087/4088/4089/4194/4287/4609/4738/4798/5071/5423/5682/5684/5685/5686/5687/5690/5691/5693/5695/5700/5704/5706/5707/5708/5709/5711/5715/5717/5718/5719/5721/5728/5886/5887/6233/6314/6472/6478/6502/7046/7128/7186/7187/7311/7316/7347/7353/7375/7398/7415/7528/8237/8314/8464/8607/8665/8724/8737/9097/9099/9100/9101/9146/9733/9736/9738/9804/9817…	144
ACC	GO:0031145	anaphase-promoting complex-dependent catabolic process	55/5696	72/12611	6.27673e-08	3.13727e-06	2.8014e-06	701/891/983/991/996/1017/4085/5347/5682/5684/5685/5686/5687/5690/5691/5693/5695/5700/5704/5706/5707/5708/5709/5711/5715/5717/5718/5719/5721/6233/6790/7311/7316/7324/8452/8881/9184/9212/9232/9861/10197/10213/11065/23198/25906/26271/27338/29882/51343/51433/51434/51529/64682/119504/246184	55
ACC	GO:0016571	histone methylation	78/5696	111/12611	6.95132e-08	3.4445e-06	3.07574e-06	672/1499/1786/2091/2146/2625/3009/3275/3276/3720/4089/4221/4297/4302/4524/5252/5926/5929/6018/6830/6839/7468/7936/8726/9070/9555/9646/9757/9869/10196/10419/10498/10664/10919/11091/11137/22823/22938/22976/23028/23081/23168/23476/23512/26053/26097/26147/29072/30827/51111/51742/54623/54880/54904/55011/55183/55209/55818/55870/55904/56254/56950/57343/57673/63925/64324/64754/79723/79813/80312/80335/844…	78
ACC	GO:0051784	negative regulation of nuclear division	43/5696	53/12611	7.94788e-08	3.90465e-06	3.48663e-06	472/652/655/699/701/891/991/1063/1111/3976/4085/5347/5810/7175/7272/7517/7756/8260/8379/8658/9183/9184/9212/9232/9319/10201/10403/10459/25906/26271/27085/28984/51143/54908/55755/55795/56155/56984/81620/84861/146691/286151/348654	43
ACC	GO:0006302	double-strand break repair	131/5696	207/12611	9.59018e-08	4.6323e-06	4.13637e-06	142/472/580/641/672/675/1111/1653/1663/1763/2067/2140/2237/2305/2521/2547/3014/3297/3980/4171/4172/4173/4174/4175/4176/4292/4361/4436/4796/5423/5531/5591/5888/5889/5890/5892/5932/5965/5980/6117/6118/6119/6421/7336/7341/7405/7415/7468/7486/7515/7517/7520/7528/7913/8091/8317/8318/8363/8365/8438/8914/8924/9112/9319/9320/9401/9656/9985/10038/10097/10213/10459/10635/10933/11200/22976/22992/23028/23064…	131
ACC	GO:0006270	DNA replication initiation	31/5696	35/12611	1.01093e-07	4.80233e-06	4.2882e-06	898/990/997/1017/4171/4172/4173/4174/4175/4176/4998/4999/5000/5001/5426/5427/5557/5558/8318/9134/23594/23595/23649/54107/55388/56655/56897/57418/81620/90381/222229	31
ACC	GO:0008213	protein alkylation	98/5696	147/12611	1.03667e-07	4.84452e-06	4.32588e-06	672/1499/1786/2091/2146/2625/3009/3275/3276/3720/4089/4221/4297/4302/4524/5110/5252/5865/5870/5926/5929/6018/6628/6634/6830/6839/7468/7832/7936/8726/9070/9545/9555/9646/9757/9869/10196/10419/10498/10664/10919/11091/11137/22823/22938/22976/23028/23081/23168/23463/23476/23512/25895/26053/26097/26147/29072/30827/51111/51504/51603/51742/54093/54623/54880/54904/55011/55183/55209/55471/55818/55870/5590…	98
ACC	GO:0042273	ribosomal large subunit biogenesis	49/5696	63/12611	1.22195e-07	5.66431e-06	5.0579e-06	14/3692/4736/4809/4839/4931/6122/6125/6128/6129/6130/6134/6135/6136/6147/6152/6154/6165/6169/6175/8886/9045/9326/11224/22868/22907/23246/23481/23560/26155/29997/51154/51187/51388/51491/54475/54663/55003/55027/55299/55759/56342/65003/79707/84154/84231/117246/220064/285855	49
ACC	GO:0016072	rRNA metabolic process	129/5696	204/12611	1.28133e-07	5.89206e-06	5.26127e-06	705/1662/1736/2091/2483/3669/4736/4809/4839/4931/5036/5394/5822/6125/6129/6130/6135/6154/6155/6165/6187/6194/6201/6202/6203/6209/6217/6218/6223/6227/6229/6839/8568/8780/8886/9045/9092/9136/9188/9221/9277/9326/9775/9790/10199/10248/10360/10521/10528/10556/10557/10799/10885/11056/11224/11340/22894/22984/23016/23076/23160/23246/23378/23404/23481/23560/25926/25983/26168/27043/27341/28987/29960/29997/…	129
ACC	GO:0051783	regulation of nuclear division	106/5696	162/12611	1.37567e-07	6.27569e-06	5.60383e-06	472/652/655/699/701/811/891/990/991/995/996/1062/1063/1104/1111/1613/1950/2827/3192/3303/3304/3479/3643/3832/3976/4085/4288/4733/4751/4926/5300/5347/5810/5902/6790/7175/7272/7474/7517/7756/8243/8260/8379/8452/8658/8877/9088/9126/9183/9184/9212/9232/9319/9525/9555/9585/9587/9700/9735/9787/10201/10274/10403/10419/10459/10460/10783/11065/11331/23113/23137/23363/23636/25906/26271/27085/28984/51143/51…	106
ACC	GO:0090305	nucleic acid phosphodiester bond hydrolysis	158/5696	259/12611	1.67541e-07	7.46404e-06	6.66495e-06	142/283/581/836/1149/1479/1642/1653/1676/1677/1763/1775/1776/1797/2021/2067/2068/2071/2073/2081/2237/2965/2968/3005/3146/3148/3297/3669/3837/4343/4361/4686/4848/4913/5111/5167/5394/5395/5424/5425/5426/5428/5438/5511/5810/5883/5932/5980/5982/5983/5984/5985/6038/6117/6118/6119/6227/6233/7247/7257/7311/7316/7486/7507/8451/9131/9156/9557/9692/9797/9941/9978/10248/10535/10556/10557/10714/10799/10898/1…	158
ACC	GO:0072422	signal transduction involved in DNA damage checkpoint	50/5696	65/12611	1.70225e-07	7.46404e-06	6.66495e-06	472/581/672/835/891/983/988/995/1017/1111/1263/1647/1869/1874/2033/2810/3276/4194/4582/4848/4849/5111/5325/5347/5591/6154/6790/7027/7029/7832/9125/10498/10769/11200/23019/25904/28984/29086/51343/51512/51514/51720/55367/55571/57060/57472/60561/79733/144455/246175	50
ACC	GO:0032392	DNA geometric change	76/5696	109/12611	1.71408e-07	7.46404e-06	6.66495e-06	142/641/1106/1107/1642/1653/1660/1663/1763/2068/2071/2074/2547/2963/2965/2968/3146/3148/3149/3159/3181/3508/4171/4172/4173/4174/4175/4176/4331/4361/5887/5888/5965/5982/5983/5984/5985/6117/6233/6832/7153/7311/7316/7486/7507/7520/8318/8438/8451/8607/9401/9557/9837/9978/10856/22907/23064/25788/50485/51659/54617/54821/56652/56852/56897/57680/79075/80119/83990/84083/84296/84515/84893/89797/93973/170506	76
ACC	GO:0006338	chromatin remodeling	110/5696	170/12611	1.92158e-07	8.30469e-06	7.4156e-06	86/473/1058/1107/1616/1786/1788/1810/2491/2625/2648/3020/3021/3066/3070/3146/3148/3149/3159/3183/3720/4152/4609/4678/5253/5757/5927/5928/6597/6599/6602/6662/6830/6839/6871/7175/8091/8242/8289/8351/8352/8353/8355/8357/8363/8365/8607/8932/9031/9219/9557/9682/9759/9869/10155/10360/10629/10765/10856/11164/11176/11177/11335/22880/22890/22955/23030/23081/23135/23198/23314/23347/23378/29994/51535/51773/…	110
ACC	GO:0044783	G1 DNA damage checkpoint	46/5696	59/12611	2.62798e-07	1.1026e-05	9.8456e-06	472/581/595/835/891/983/995/1017/1263/1647/1869/1874/2033/2810/3276/4194/4582/4848/4849/5111/5325/5591/6118/6154/6790/7027/7029/7832/9125/10498/10769/11200/23019/25904/26058/28984/51322/51512/55159/55367/55571/57060/57472/79733/144455/246175	46
ACC	GO:0043484	regulation of RNA splicing	79/5696	115/12611	2.65815e-07	1.10718e-05	9.88645e-06	1195/1196/1198/1859/2081/2521/3178/3181/3185/3190/3191/3192/3303/4686/5295/5430/5725/5936/6207/6231/6426/6427/6428/6429/6431/6432/6433/6434/6625/6651/6732/7072/8241/8683/8882/9588/9589/9733/9939/9967/9991/10179/10181/10262/10521/10657/10658/10772/10921/10922/10929/11338/22927/22938/23064/23076/23210/23543/26528/27316/29890/29896/51755/54845/55234/55544/57703/58155/58517/64783/79171/83759/84081/84…	79
ACC	GO:0006354	DNA-templated transcription, elongation	72/5696	103/12611	3.07223e-07	1.26137e-05	1.12633e-05	905/1025/2068/2071/2074/2146/2962/2963/2965/2968/3150/3192/4298/4300/4331/4686/5430/5433/5434/5435/5436/5437/5438/5441/5457/6749/6829/6830/6908/6917/6921/6924/7919/7936/8178/8563/8812/9014/9015/9150/9533/9646/9984/10189/10771/10849/11047/11198/22828/22916/23168/23476/25885/25920/29072/51497/51755/54623/55140/55250/55795/57805/64425/79101/79577/79736/80237/84172/84337/123169/165918/284695	72
ACC	GO:0051031	tRNA transport	29/5696	33/12611	3.92038e-07	1.59818e-05	1.42708e-05	4927/5901/5903/6396/6741/7175/8021/8480/9631/9688/9804/9818/9972/10762/11097/11260/23165/23225/23279/23511/23636/53371/55706/55746/57122/79902/81929/129401/348995	29
ACC	GO:0031571	mitotic G1 DNA damage checkpoint	45/5696	58/12611	4.57878e-07	1.84048e-05	1.64344e-05	472/581/595/835/891/983/995/1017/1263/1647/1869/1874/2033/2810/3276/4194/4582/4848/4849/5111/5325/5591/6118/6154/6790/7027/7029/7832/9125/10498/10769/11200/23019/25904/26058/28984/51512/55159/55367/55571/57060/57472/79733/144455/246175	45
ACC	GO:0071897	DNA biosynthetic process	105/5696	163/12611	5.02105e-07	1.99041e-05	1.77732e-05	472/545/659/908/1032/1063/1499/1602/1736/3082/3178/3181/3183/3184/3192/3978/3980/4221/4361/4609/4751/4931/5111/5394/5423/5424/5425/5426/5427/5428/5429/5478/5570/5594/5609/5980/5982/5983/5984/5985/6117/6118/6119/6233/7011/7013/7014/7015/7027/7083/7298/7311/7316/7353/7415/7486/7520/7919/8658/8877/9100/9212/9314/9768/9887/9894/10459/10574/10575/10576/10694/10714/10715/10728/11201/11232/11284/22890/2…	105
ACC	GO:2001252	positive regulation of chromosome organization	100/5696	154/12611	5.32801e-07	2.08336e-05	1.86032e-05	472/545/604/672/891/908/1025/1499/1663/1736/1786/2067/2237/2625/2648/3009/3178/3181/3184/3192/3670/3720/3976/4089/4297/4361/4582/4751/4926/5252/5514/5570/5587/5594/5609/6421/6591/6871/7013/7175/7422/7520/7936/8452/8658/8726/8986/9212/9555/9646/9700/9733/9787/9810/9869/10155/10270/10574/10575/10576/10694/10856/10891/11143/11284/22823/22880/22938/22948/22976/23028/23137/23168/23476/25865/26053/2609…	100
ACC	GO:0006275	regulation of DNA replication	66/5696	94/12611	7.35856e-07	2.83873e-05	2.53482e-05	466/545/604/641/675/890/983/990/1017/1602/1660/1763/2735/2736/2956/3265/3980/4361/5111/5518/5879/5930/5982/5983/5984/5985/7013/7014/7126/7270/8243/8317/8914/9126/10919/10926/11200/23063/23560/26271/29980/50485/51053/54617/54962/55704/56897/57418/57695/58525/59343/64710/79075/79733/79915/79991/80174/81620/84083/84893/90381/91603/114799/144455/146059/157570	66
ACC	GO:0032508	DNA duplex unwinding	70/5696	101/12611	7.49751e-07	2.87304e-05	2.56546e-05	142/641/1106/1107/1642/1653/1660/1663/1763/2068/2071/2074/2547/2963/2965/2968/3159/3508/4171/4172/4173/4174/4175/4176/4331/4361/5887/5888/5965/5982/5983/5984/5985/6117/6233/6832/7153/7311/7316/7486/7507/7520/8318/8451/8607/9401/9557/9837/9978/10856/22907/23064/25788/51659/54617/54821/56652/56852/56897/57680/79075/80119/83990/84083/84296/84515/84893/89797/93973/170506	70
ACC	GO:0006409	tRNA export from nucleus	28/5696	32/12611	7.67623e-07	2.90283e-05	2.59206e-05	4927/5901/5903/6396/6741/7175/8021/8480/9631/9688/9818/9972/10762/11097/11260/23165/23225/23279/23511/23636/53371/55706/55746/57122/79902/81929/129401/348995	28
ACC	GO:0071431	tRNA-containing ribonucleoprotein complex export from nucleus	28/5696	32/12611	7.67623e-07	2.90283e-05	2.59206e-05	4927/5901/5903/6396/6741/7175/8021/8480/9631/9688/9818/9972/10762/11097/11260/23165/23225/23279/23511/23636/53371/55706/55746/57122/79902/81929/129401/348995	28
ACC	GO:0043161	proteasome-mediated ubiquitin-dependent protein catabolic process	213/5696	370/12611	7.9715e-07	2.99478e-05	2.67417e-05	329/406/550/701/891/899/983/991/996/997/1017/1263/1454/1499/1601/1642/2768/2931/2932/3300/3303/3304/3309/3429/4085/4130/4287/4780/5071/5094/5347/5527/5663/5682/5684/5685/5686/5687/5690/5691/5693/5695/5700/5704/5706/5707/5708/5709/5711/5715/5717/5718/5719/5721/5886/5887/6048/6135/6233/6478/6502/6599/6613/6782/6790/6880/7126/7184/7311/7316/7324/7326/7327/7341/7353/7415/7480/8065/8451/8452/8453/8554…	213
ACC	GO:0002181	cytoplasmic translation	63/5696	89/12611	8.29798e-07	3.08849e-05	2.75784e-05	1660/1802/1938/1968/1973/1975/1978/1981/2475/3646/3921/4733/4736/5936/6128/6132/6135/6138/6139/6141/6142/6143/6152/6154/6156/6159/6160/6161/6165/6169/6171/6175/6176/6227/6231/6235/7458/7555/8531/8562/8661/8662/8664/8665/8666/8667/8669/8894/10480/23521/25873/51182/51372/51386/51441/51611/55854/56339/90381/92715/120526/170506/285381	63
ACC	GO:0045815	positive regulation of gene expression, epigenetic	39/5696	49/12611	8.32839e-07	3.08849e-05	2.75784e-05	1111/1499/2033/2074/2648/3005/3009/3159/4641/5434/5435/5437/5441/6602/6908/7913/8289/8971/9014/9015/9031/9188/9533/9555/9757/10514/10849/23451/25842/25885/29028/54454/56848/57492/64425/79101/80336/84172/84337	39
ACC	GO:0033047	regulation of mitotic sister chromatid segregation	50/5696	67/12611	8.72229e-07	3.21383e-05	2.86976e-05	472/699/701/891/990/991/996/1062/1063/3192/4085/4926/5347/7175/7272/7517/7756/8260/8379/8452/8658/9183/9184/9212/9232/9319/9555/9700/9787/10403/10459/10460/10783/23137/25906/26271/51143/51433/51529/54908/55719/55755/55795/56155/56984/64682/81620/84861/246184/348654	50
ACC	GO:0007091	metaphase/anaphase transition of mitotic cell cycle	42/5696	54/12611	9.8789e-07	3.5288e-05	3.15101e-05	472/699/701/891/990/991/996/1062/1063/4085/5347/7175/7272/7517/7756/8379/8452/9183/9184/9212/9319/9700/9787/10403/10459/10460/10783/25906/26271/51143/51433/51529/54908/55755/55795/56155/56984/64682/81620/84861/246184/348654	42
ACC	GO:1902402	signal transduction involved in mitotic DNA damage checkpoint	42/5696	54/12611	9.8789e-07	3.5288e-05	3.15101e-05	472/581/835/891/983/995/1017/1263/1647/1869/1874/2033/2810/3276/4194/4582/4848/4849/5111/5325/5591/6154/6790/7027/7029/7832/9125/10498/10769/11200/23019/25904/28984/51512/55367/55571/57060/57472/60561/79733/144455/246175	42
ACC	GO:1902403	signal transduction involved in mitotic DNA integrity checkpoint	42/5696	54/12611	9.8789e-07	3.5288e-05	3.15101e-05	472/581/835/891/983/995/1017/1263/1647/1869/1874/2033/2810/3276/4194/4582/4848/4849/5111/5325/5591/6154/6790/7027/7029/7832/9125/10498/10769/11200/23019/25904/28984/51512/55367/55571/57060/57472/60561/79733/144455/246175	42
ACC	GO:0036297	interstrand cross-link repair	37/5696	46/12611	9.88407e-07	3.5288e-05	3.15101e-05	545/2067/2176/2177/2178/2189/2956/5888/5892/6117/6118/6119/6233/7311/7316/7398/7507/7517/10635/29089/55159/55215/57599/57697/64421/64710/64789/64858/80198/80233/84126/84515/146956/165918/199990/201254/375748	37
ACC	GO:0010965	regulation of mitotic sister chromatid separation	43/5696	56/12611	1.3703e-06	4.74487e-05	4.2369e-05	472/699/701/891/990/991/996/1062/1063/4085/5347/7175/7272/7517/7756/8379/8452/9183/9184/9212/9232/9319/9700/9787/10403/10459/10460/10783/25906/26271/51143/51433/51529/54908/55755/55795/56155/56984/64682/81620/84861/246184/348654	43
ACC	GO:0007094	mitotic spindle assembly checkpoint	29/5696	34/12611	1.50908e-06	5.10248e-05	4.55622e-05	472/699/701/891/991/1063/4085/5347/7175/7272/7517/7756/8379/9183/9184/9212/9319/10403/10459/25906/51143/54908/55755/55795/56155/56984/81620/84861/348654	29
ACC	GO:0072431	signal transduction involved in mitotic G1 DNA damage checkpoint	41/5696	53/12611	1.71757e-06	5.73987e-05	5.12537e-05	472/581/835/891/983/995/1017/1263/1647/1869/1874/2033/2810/3276/4194/4582/4848/4849/5111/5325/5591/6154/6790/7027/7029/7832/9125/10498/10769/11200/23019/25904/28984/51512/55367/55571/57060/57472/79733/144455/246175	41
ACC	GO:1902400	intracellular signal transduction involved in G1 DNA damage checkpoint	41/5696	53/12611	1.71757e-06	5.73987e-05	5.12537e-05	472/581/835/891/983/995/1017/1263/1647/1869/1874/2033/2810/3276/4194/4582/4848/4849/5111/5325/5591/6154/6790/7027/7029/7832/9125/10498/10769/11200/23019/25904/28984/51512/55367/55571/57060/57472/79733/144455/246175	41
ACC	GO:2000134	negative regulation of G1/S transition of mitotic cell cycle	64/5696	92/12611	1.81145e-06	6.01862e-05	5.37428e-05	472/581/595/835/891/983/989/995/1017/1021/1032/1263/1647/1869/1874/2033/2146/2810/3275/3276/4194/4582/4848/4849/5111/5325/5591/5728/6118/6154/6790/7027/7029/7465/7832/8737/9125/9314/10106/10263/10385/10498/10769/11170/11200/23019/25793/25904/26058/28984/51339/51512/55159/55367/55571/57060/57165/57472/58190/79027/79577/79733/144455/246175	64
ACC	GO:0034968	histone lysine methylation	65/5696	94/12611	2.10122e-06	6.82362e-05	6.09309e-05	672/1499/1786/2146/2625/3009/3720/4089/4221/4297/4302/5252/5926/5929/6018/6830/6839/7468/7936/8726/9070/9555/9646/9757/9869/10919/11091/11137/22823/22938/22976/23028/23081/23168/23476/23512/26053/26147/29072/30827/51111/51742/54880/54904/55011/55183/55209/55818/55870/55904/56950/57343/57673/63925/64324/64754/79723/79813/80335/84444/84661/84787/140690/200424/387893	65
ACC	GO:1902807	negative regulation of cell cycle G1/S phase transition	65/5696	94/12611	2.10122e-06	6.82362e-05	6.09309e-05	472/581/595/835/891/983/989/995/1017/1021/1032/1263/1647/1869/1874/2033/2146/2810/3275/3276/4194/4221/4582/4848/4849/5111/5325/5591/5728/6118/6154/6790/7027/7029/7465/7832/8737/9125/9314/10106/10263/10385/10498/10769/11170/11200/23019/25793/25904/26058/28984/51339/51512/55159/55367/55571/57060/57165/57472/58190/79027/79577/79733/144455/246175	65
ACC	GO:2000045	regulation of G1/S transition of mitotic cell cycle	85/5696	130/12611	2.44521e-06	7.80838e-05	6.97243e-05	472/581/595/637/835/891/894/898/983/989/990/995/1017/1021/1032/1263/1647/1869/1874/1981/2033/2146/2810/3275/3276/3398/4194/4582/4848/4849/5111/5310/5325/5591/5721/5728/6118/6154/6790/6868/7015/7027/7029/7465/7832/8318/8451/8737/9125/9314/9510/9928/10106/10197/10263/10385/10498/10769/11170/11200/11319/23019/25793/25904/26058/27085/28984/51339/51512/54617/55159/55367/55571/55904/57060/57165/57472/5…	85
ACC	GO:0045841	negative regulation of mitotic metaphase/anaphase transition	30/5696	36/12611	2.68093e-06	8.42077e-05	7.51926e-05	472/699/701/891/991/1063/4085/5347/7175/7272/7517/7756/8379/9183/9184/9212/9319/10403/10459/25906/26271/51143/54908/55755/55795/56155/56984/81620/84861/348654	30
ACC	GO:0097064	ncRNA export from nucleus	30/5696	36/12611	2.68093e-06	8.42077e-05	7.51926e-05	4927/5901/5903/6396/6741/7175/7248/8021/8480/9631/9688/9818/9972/10762/11097/11260/22916/23165/23225/23279/23511/23636/53371/55706/55746/57122/79902/81929/129401/348995	30
ACC	GO:1902100	negative regulation of metaphase/anaphase transition of cell cycle	30/5696	36/12611	2.68093e-06	8.42077e-05	7.51926e-05	472/699/701/891/991/1063/4085/5347/7175/7272/7517/7756/8379/9183/9184/9212/9319/10403/10459/25906/26271/51143/54908/55755/55795/56155/56984/81620/84861/348654	30
ACC	GO:0000387	spliceosomal snRNP assembly	28/5696	33/12611	2.8709e-06	8.96845e-05	8.00831e-05	1207/6607/6628/6631/6632/6633/6634/6635/6636/6637/7375/8487/9092/9129/9733/10419/10421/10594/10772/11171/11218/25804/25980/26121/50628/79760/79833/100130932	28
ACC	GO:0009303	rRNA transcription	26/5696	30/12611	2.90599e-06	9.02898e-05	8.06236e-05	283/1663/2475/2972/2975/2976/4141/4691/6597/9014/9328/9329/9330/9555/10360/10849/10927/11137/25926/29997/51547/55011/64425/64768/84172/84365	26
ACC	GO:0018022	peptidyl-lysine methylation	72/5696	107/12611	2.97083e-06	9.08321e-05	8.11078e-05	672/1499/1786/2146/2625/3009/3720/4089/4221/4297/4302/5252/5926/5929/6018/6830/6839/7468/7936/8726/9070/9555/9646/9757/9869/10919/11091/11137/22823/22938/22976/23028/23081/23168/23476/23512/25895/26053/26147/29072/30827/51111/51742/54093/54880/54904/55011/55183/55209/55818/55870/55904/56950/57343/57673/63925/64324/64754/79091/79609/79723/79813/80335/84444/84661/84787/140690/196483/200424/387893/3…	72
ACC	GO:0006977	DNA damage response, signal transduction by p53 class mediator resulting in cell cycle arrest	40/5696	52/12611	2.97085e-06	9.08321e-05	8.11078e-05	472/581/835/891/983/995/1017/1263/1647/1869/1874/2033/2810/3276/4194/4582/4848/4849/5111/5325/6154/6790/7027/7029/7832/9125/10498/10769/11200/23019/25904/28984/51512/55367/55571/57060/57472/79733/144455/246175	40
ACC	GO:0075733	intracellular transport of virus	40/5696	52/12611	2.97085e-06	9.08321e-05	8.11078e-05	3837/3838/3839/4927/5901/5903/6233/6396/7175/7251/7311/7316/7514/8021/8480/9397/9631/9688/9818/9972/10762/11097/23165/23225/23279/23511/23636/53371/55048/55706/55746/57122/79720/79902/81929/89853/93343/129401/155382/348995	40
ACC	GO:0006417	regulation of translation	170/5696	291/12611	3.02156e-06	9.18938e-05	8.20559e-05	208/283/387/468/678/811/1613/1653/1660/1719/1802/1938/1965/1968/1975/1978/1979/1981/1982/1994/2058/2475/2872/2886/3184/3315/3609/3646/3658/3692/4076/4343/4528/4686/4691/4848/4849/5036/5433/5436/5499/5594/5610/5936/5976/5997/6093/6125/6134/6146/6154/6169/6176/6188/6191/6195/6197/6199/6203/6256/6311/6470/6472/6726/6895/7057/7072/7175/7248/7298/7431/7458/7555/7832/7919/8087/8440/8507/8531/8569/8570/…	170
ACC	GO:0034502	protein localization to chromosome	56/5696	79/12611	3.1339e-06	9.48088e-05	8.46588e-05	472/545/675/908/983/1058/1736/2146/3009/4436/5347/6117/6118/7013/7014/7015/7272/7520/8658/9183/9184/9212/9555/10403/10498/10574/10575/10576/10664/10694/10856/22948/23063/23383/26277/26354/27085/29072/51535/54908/55011/55135/55166/55719/55920/57082/65057/80351/81620/83903/84515/91272/113130/157570/221496/222229	56
ACC	GO:0034724	DNA replication-independent nucleosome organization	35/5696	44/12611	3.1741e-06	9.5522e-05	8.52956e-05	1058/2491/3020/3021/4678/5928/7290/8363/8365/8520/8607/11198/23523/25842/29855/51773/54069/54107/55166/55320/55355/55723/55839/57082/64105/64946/79019/79172/79682/79711/80152/91687/201254/387103/401541	35
ACC	GO:0006353	DNA-templated transcription, termination	50/5696	69/12611	3.77659e-06	0.000111422	9.9493e-05	1477/1479/1660/2068/2071/2965/2968/4150/4331/4686/5430/5434/5435/5437/5441/6607/6628/6634/6635/6636/6637/6908/7270/7884/8106/8189/8458/9014/9015/9533/10419/10849/10898/10914/11051/22828/22916/23064/25885/25888/29894/51585/51692/53981/55339/57466/64425/79101/79869/84172	50
ACC	GO:0033048	negative regulation of mitotic sister chromatid segregation	33/5696	41/12611	3.77996e-06	0.000111422	9.9493e-05	472/699/701/891/991/1063/4085/5347/7175/7272/7517/7756/8260/8379/8658/9183/9184/9212/9232/9319/10403/10459/25906/26271/51143/54908/55755/55795/56155/56984/81620/84861/348654	33
ACC	GO:1902806	regulation of cell cycle G1/S phase transition	91/5696	142/12611	3.92894e-06	0.000115222	0.000102887	472/493/581/595/637/835/891/894/898/983/989/990/995/1017/1021/1032/1263/1647/1869/1874/1981/2033/2146/2735/2810/3275/3276/3398/4194/4221/4582/4848/4849/5111/5310/5325/5591/5721/5728/6118/6154/6790/6868/7015/7027/7029/7465/7832/8318/8451/8737/9125/9314/9510/9928/10106/10197/10263/10385/10498/10769/11170/11200/11319/11331/23019/25793/25904/26058/27085/28984/51339/51512/54617/54623/55159/55367/55571…	91
ACC	GO:0090307	mitotic spindle assembly	41/5696	54/12611	4.01885e-06	0.000117261	0.000104707	332/387/991/2801/3192/3303/3304/3796/3832/3833/3837/4605/4733/4751/5347/7175/7756/8243/8766/9126/9212/9493/9525/10274/10464/11200/22974/23172/23332/24137/29127/49856/55125/55154/56647/79598/126353/126731/152185/285643/440145	41
ACC	GO:2000816	negative regulation of mitotic sister chromatid separation	31/5696	38/12611	4.40406e-06	0.000127209	0.00011359	472/699/701/891/991/1063/4085/5347/7175/7272/7517/7756/8379/9183/9184/9212/9232/9319/10403/10459/25906/26271/51143/54908/55755/55795/56155/56984/81620/84861/348654	31
ACC	GO:0006352	DNA-templated transcription, initiation	125/5696	206/12611	4.67218e-06	0.000133611	0.000119306	190/581/595/865/891/892/983/1025/1385/1499/1810/1870/2063/2068/2071/2649/2958/2960/2961/2962/2963/2965/2968/2972/2975/3146/4150/4286/4306/4331/4853/4929/5430/5433/5434/5435/5436/5437/5438/5441/5442/5465/5469/5704/5706/5728/5915/5916/6095/6097/6256/6597/6662/6722/6873/6875/6877/6880/6882/6908/6910/7003/7004/7019/7025/7068/7101/7181/7182/7480/7596/8013/8061/8148/8363/8365/8463/9014/9015/9328/9329/9…	125
ACC	GO:0030071	regulation of mitotic metaphase/anaphase transition	39/5696	51/12611	5.11115e-06	0.000144724	0.00012923	472/699/701/891/990/991/1062/1063/4085/5347/7175/7272/7517/7756/8379/8452/9183/9184/9212/9319/9700/9787/10403/10459/10783/25906/26271/51143/51433/51529/54908/55755/55795/56155/56984/81620/84861/246184/348654	39
ACC	GO:0090329	regulation of DNA-dependent DNA replication	39/5696	51/12611	5.11115e-06	0.000144724	0.00012923	604/641/675/1017/1602/2956/3980/4361/5982/5983/5984/5985/7013/7014/8243/8317/8914/9126/10926/11200/26271/29980/50485/51053/54617/54962/56897/57418/58525/59343/79075/79733/80174/81620/84083/84893/90381/91603/144455	39
ACC	GO:0010498	proteasomal protein catabolic process	235/5696	421/12611	5.29204e-06	0.000148623	0.000132712	329/406/550/701/891/899/983/991/996/997/1017/1263/1454/1499/1601/1642/1861/2768/2931/2932/3300/3303/3304/3309/3429/4085/4130/4287/4780/5071/5094/5310/5347/5527/5663/5682/5684/5685/5686/5687/5690/5691/5693/5695/5700/5704/5706/5707/5708/5709/5711/5715/5717/5718/5719/5721/5886/5887/6048/6135/6233/6388/6478/6502/6599/6613/6782/6790/6880/7126/7184/7311/7316/7324/7326/7327/7341/7353/7415/7480/8065/8451…	235
ACC	GO:0031060	regulation of histone methylation	42/5696	56/12611	5.30059e-06	0.000148623	0.000132712	672/1499/1786/2625/3009/3720/4089/4297/4302/4524/5252/6830/7936/8726/9555/9646/9757/10664/22823/22938/22976/23028/23081/23168/23476/26053/26097/26147/54623/54880/54904/55011/55183/55818/55904/56254/57343/63925/64324/80312/94104/140690	42
ACC	GO:0000027	ribosomal large subunit assembly	23/5696	26/12611	5.36789e-06	0.00014978	0.000133745	4839/6122/6125/6128/6134/6135/6136/6147/6152/6169/6175/22868/22907/23246/29997/51154/51187/54475/55299/56342/65003/84154/84231	23
ACC	GO:0006298	mismatch repair	27/5696	32/12611	5.43461e-06	0.000150183	0.000134105	25/2067/2956/3146/3978/4292/4436/4595/5111/5378/5379/5383/5387/5395/5424/5425/6117/6118/6119/6996/7161/8313/9156/10535/10714/29072/83933	27
ACC	GO:0006369	termination of RNA polymerase II transcription	27/5696	32/12611	5.43461e-06	0.000150183	0.000134105	1477/1479/4150/4686/6628/6634/6635/6636/6637/7884/8106/8189/8458/10898/10914/11051/22828/22916/23064/25888/29894/51585/51692/53981/55339/57466/79869	27
ACC	GO:0032786	positive regulation of DNA-templated transcription, elongation	25/5696	29/12611	5.61533e-06	0.000154435	0.000137902	905/1025/2074/2962/2963/3150/6829/6830/6921/7919/8178/8563/8812/9646/9984/10189/11198/22828/23168/23476/51755/54623/79577/80237/123169	25
ACC	GO:0006336	DNA replication-independent nucleosome assembly	34/5696	43/12611	5.64281e-06	0.000154452	0.000137917	1058/2491/3020/3021/4678/5928/7290/8363/8365/8520/8607/23523/25842/29855/51773/54069/54107/55166/55320/55355/55723/55839/57082/64105/64946/79019/79172/79682/79711/80152/91687/201254/387103/401541	34
ACC	GO:0042255	ribosome assembly	40/5696	53/12611	6.8271e-06	0.000184236	0.000164512	3692/3921/4839/5822/6122/6125/6128/6134/6135/6136/6147/6152/6169/6175/6193/6204/6209/6223/22868/22907/23246/26284/27341/29997/51116/51154/51187/51388/54475/55299/56342/64963/65003/83939/84154/84231/84769/91695/130916/387338	40
ACC	GO:0000724	double-strand break repair via homologous recombination	76/5696	116/12611	7.35619e-06	0.000197586	0.000176433	142/472/641/672/675/1111/2237/2521/3014/3980/4171/4172/4173/4174/4175/4176/4361/4796/5531/5888/5889/5890/5892/5932/5965/5980/6117/6118/6119/6421/7486/7515/7517/7528/8317/8318/8438/8914/9401/9985/10097/10213/10459/10635/10933/23028/23137/23347/23503/25788/27343/29072/51444/51659/54537/54617/55010/55135/55159/55183/56893/57599/64210/64710/79000/80010/80198/84296/84515/84893/116028/119392/147872/253…	76
ACC	GO:0000245	spliceosomal complex assembly	39/5696	52/12611	1.1532e-05	0.000304065	0.000271513	1653/4686/6426/6431/6433/6607/6631/6632/6633/6635/6637/6732/6936/7536/7919/8175/8487/8683/9416/10181/10291/10658/10772/10907/10946/11168/22889/23020/23064/23451/27316/51631/51747/55015/55692/57461/58155/79833/91746	39
ACC	GO:1902099	regulation of metaphase/anaphase transition of cell cycle	39/5696	52/12611	1.1532e-05	0.000304065	0.000271513	472/699/701/891/990/991/1062/1063/4085/5347/7175/7272/7517/7756/8379/8452/9183/9184/9212/9319/9700/9787/10403/10459/10783/25906/26271/51143/51433/51529/54908/55755/55795/56155/56984/81620/84861/246184/348654	39
ACC	GO:0000725	recombinational repair	76/5696	117/12611	1.17537e-05	0.000308496	0.000275469	142/472/641/672/675/1111/2237/2521/3014/3980/4171/4172/4173/4174/4175/4176/4361/4796/5531/5888/5889/5890/5892/5932/5965/5980/6117/6118/6119/6421/7486/7515/7517/7528/8317/8318/8438/8914/9401/9985/10097/10213/10459/10635/10933/23028/23137/23347/23503/25788/27343/29072/51444/51659/54537/54617/55010/55135/55159/55183/56893/57599/64210/64710/79000/80010/80198/84296/84515/84893/116028/119392/147872/253…	76
ACC	GO:0031058	positive regulation of histone modification	54/5696	78/12611	1.43549e-05	0.000375054	0.000334901	472/604/672/891/1025/1499/1786/2625/2648/3009/3670/3720/3976/4089/4297/4582/5252/5587/6591/6871/7422/7936/8726/8986/9646/9733/9810/10270/10856/10891/11143/22823/22938/22976/23028/23168/23476/25865/26053/26097/26147/26993/54623/54904/55011/55183/55904/56254/56848/57343/80312/94104/120892/122953	54
ACC	GO:0030261	chromosome condensation	29/5696	36/12611	1.45399e-05	0.000378169	0.000337683	891/983/1677/2852/3005/3009/3020/3021/7153/8091/8815/8971/9131/9918/10051/10270/10592/22985/23063/23310/23397/26993/29781/51203/54892/64151/79142/113130/148479	29
ACC	GO:0009301	snRNA transcription	47/5696	66/12611	1.58788e-05	0.000409287	0.00036547	905/1025/2958/2960/2961/2962/2963/4686/5430/5433/5434/5435/5436/5437/5438/5441/5451/6617/6618/6619/6621/6667/6877/6880/6882/6908/7702/8178/8812/10208/22916/25896/26173/26512/51593/54973/55656/55726/58490/65123/79664/79871/80237/80789/81556/84524/92105	47
ACC	GO:0016441	posttranscriptional gene silencing	87/5696	138/12611	1.63978e-05	0.00042078	0.000375732	652/1660/1981/1994/3020/3021/3181/3692/4087/4088/4343/4927/5430/5433/5434/5435/5436/5437/5438/5441/5460/5511/5604/5605/5901/5903/5936/6396/6895/7015/7175/7247/7257/8021/8087/8351/8352/8353/8355/8357/8363/8365/8480/8575/8737/9611/9631/9688/9698/9818/9972/10658/10762/11097/23019/23112/23165/23225/23264/23279/23369/23511/23636/26058/26523/27161/51490/51593/53371/54487/55706/55746/56339/57122/57472/5…	87
ACC	GO:1902275	regulation of chromatin organization	95/5696	153/12611	1.69987e-05	0.000432339	0.000386053	472/604/672/891/1025/1111/1499/1786/2625/2648/3005/3009/3159/3192/3670/3720/3976/4089/4288/4297/4302/4524/4582/5252/5253/5587/5927/6418/6591/6830/6871/7175/7290/7422/7936/8318/8726/8971/8986/9320/9555/9646/9733/9757/9810/9869/9874/10155/10270/10474/10664/10856/10891/11011/11143/22823/22880/22938/22976/23028/23081/23168/23476/25842/25865/26053/26097/26147/26155/26993/29028/51366/51535/54454/54623/…	95
ACC	GO:0048024	regulation of mRNA splicing, via spliceosome	56/5696	82/12611	1.88962e-05	0.000478481	0.000427255	1859/3178/3181/3190/3191/3192/4686/5725/5936/6426/6427/6428/6429/6431/6432/6433/6434/6625/6651/6732/7072/8241/8683/9588/9589/9733/9939/9967/10179/10181/10262/10521/10657/10658/10772/10921/10929/11338/22938/23210/23543/26528/27316/29890/29896/55234/57703/58517/64783/79171/83759/84081/84991/91746/146713/494115	56
ACC	GO:0032784	regulation of DNA-templated transcription, elongation	35/5696	46/12611	1.90695e-05	0.000480752	0.000429284	905/1025/2074/2146/2962/2963/3150/3192/5457/6829/6830/6921/7919/7936/8178/8563/8812/9646/9984/10189/10771/11198/22828/23168/23476/25920/51497/51755/54623/57805/79577/80237/123169/165918/284695	35
ACC	GO:0042795	snRNA transcription by RNA polymerase II	46/5696	65/12611	2.53452e-05	0.00062795	0.000560723	905/1025/2958/2960/2961/2962/2963/4686/5430/5433/5434/5435/5436/5437/5438/5441/5451/6617/6618/6619/6621/6667/6877/6880/6882/6908/7702/8178/8812/22916/25896/26173/26512/51593/54973/55656/55726/58490/65123/79664/79871/80237/80789/81556/84524/92105	46
ACC	GO:1902750	negative regulation of cell cycle G2/M phase transition	59/5696	88/12611	2.70655e-05	0.000667694	0.000596212	472/641/672/983/990/1111/1112/4361/4998/5347/5682/5684/5685/5686/5687/5690/5691/5693/5695/5700/5704/5706/5707/5708/5709/5711/5715/5717/5718/5719/5721/6790/8091/9212/9344/9555/9861/9978/10197/10213/11073/22809/23194/23198/29086/29933/29980/29997/51343/51514/51720/60561/60672/63967/80279/84446/84936/90381/91603	59
ACC	GO:0035195	gene silencing by miRNA	82/5696	130/12611	2.76217e-05	0.000678503	0.000605864	652/1660/1981/1994/3020/3021/3181/3692/4087/4088/4343/4927/5430/5433/5434/5435/5436/5437/5438/5441/5460/5511/5604/5605/5901/5903/5936/6396/6895/7175/8021/8087/8351/8352/8353/8355/8357/8363/8365/8480/8575/8737/9611/9631/9688/9698/9818/9972/10762/11097/23019/23112/23165/23225/23264/23279/23369/23511/23636/26523/27161/51490/51593/53371/54487/55706/55746/56339/57122/57472/57510/65080/79670/79902/8157…	82
ACC	GO:0006997	nucleus organization	70/5696	108/12611	2.86689e-05	0.000701229	0.000626157	891/983/1639/1861/2010/2852/3020/3021/3148/3267/4926/5347/5518/5520/5578/5819/6223/6314/6683/6732/7175/7341/7443/7536/8815/8882/9133/9221/9519/9525/9631/9688/9972/10208/10783/22927/23141/23165/23175/23198/23353/23399/23435/23481/23592/23760/25909/26135/26993/27348/29082/51280/53371/55135/55706/55746/55818/55968/57122/64645/79188/79607/80346/81565/81929/84172/129401/165324/221035/221496	70
ACC	GO:0060147	regulation of posttranscriptional gene silencing	61/5696	92/12611	3.33885e-05	0.000802999	0.000717032	652/1660/1981/1994/3020/3021/4927/5430/5433/5434/5435/5436/5437/5438/5441/5460/5604/5605/5903/6396/6895/7015/7175/8021/8087/8351/8352/8353/8355/8357/8363/8365/8480/8737/9611/9631/9688/9698/9818/9972/10762/11097/23165/23225/23279/23369/23511/23636/26523/27161/53371/55706/55746/57122/57510/79902/81929/126374/129401/348995/653604	61
ACC	GO:0006283	transcription-coupled nucleotide-excision repair	48/5696	69/12611	3.50013e-05	0.00083828	0.000748536	1642/2033/2067/2068/2071/2073/2074/2873/2965/2968/3150/3978/3980/4331/5111/5424/5425/5430/5433/5434/5435/5436/5437/5438/5441/5982/5983/5984/5985/6117/6118/6119/6233/6917/7311/7316/7507/7515/8451/8533/9318/9978/10714/10920/56949/57461/64708/91603	48
ACC	GO:0016925	protein sumoylation	49/5696	71/12611	4.05016e-05	0.000950216	0.000848488	405/1499/4927/5903/5905/5970/6612/6613/7175/7341/8021/8480/8535/8554/9063/9631/9688/9759/9818/9972/10054/10055/10155/10362/10363/10401/10762/11097/23165/23225/23279/23511/23636/25950/26354/29843/51588/53335/53371/54795/55706/55746/57122/57691/59343/79902/81929/129401/348995	49
ACC	GO:0006378	mRNA polyadenylation	32/5696	42/12611	4.16993e-05	0.000970395	0.000866507	1025/1479/2926/3297/6626/6829/7936/8189/9646/9810/10914/11051/11052/22828/25962/26986/29894/51585/51692/53981/54623/55149/55339/56254/64852/64895/79577/79869/79882/80336/87178/123169	32
ACC	GO:0006301	postreplication repair	35/5696	47/12611	4.22415e-05	0.000979049	0.000874234	672/4436/5111/5424/5425/5427/5429/5980/5982/5983/5984/5985/6117/6118/6119/6233/7311/7316/7335/7336/7353/7415/9100/9768/10459/10714/11201/22890/51455/51514/55339/55666/56852/83932/199990	35
ACC	GO:0006289	nucleotide-excision repair	64/5696	98/12611	4.40985e-05	0.00101799	0.000909002	142/675/1642/2033/2067/2068/2071/2073/2074/2176/2873/2965/2968/3150/3978/3980/4287/4331/4913/5111/5424/5425/5426/5430/5433/5434/5435/5436/5437/5438/5441/5886/5887/5932/5982/5983/5984/5985/6117/6118/6119/6233/6917/7311/7316/7507/7515/8451/8533/9318/9557/9978/10714/10920/11284/27343/54778/55247/56949/57461/64210/64708/83990/91603	64
ACC	GO:0060964	regulation of gene silencing by miRNA	59/5696	89/12611	4.50986e-05	0.00103278	0.000922209	652/1660/1981/1994/3020/3021/4927/5430/5433/5434/5435/5436/5437/5438/5441/5460/5604/5605/5903/6396/6895/7175/8021/8087/8351/8352/8353/8355/8357/8363/8365/8480/8737/9611/9631/9688/9698/9818/9972/10762/11097/23165/23225/23279/23369/23511/23636/26523/27161/53371/55706/55746/57122/79902/81929/126374/129401/348995/653604	59
ACC	GO:1905269	positive regulation of chromatin organization	59/5696	89/12611	4.50986e-05	0.00103278	0.000922209	472/604/672/891/1025/1499/1786/2625/2648/3009/3670/3720/3976/4089/4297/4582/5252/5587/6591/6871/7175/7422/7936/8726/8986/9646/9733/9810/9869/10155/10270/10856/10891/11143/22823/22880/22938/22976/23028/23168/23476/25865/26053/26097/26147/26993/51535/54623/54904/55011/55183/55904/56254/56848/57343/80312/94104/120892/122953	59
ACC	GO:0031062	positive regulation of histone methylation	27/5696	34/12611	4.68458e-05	0.00106853	0.000954136	672/1499/1786/3009/3720/4089/4297/5252/7936/8726/9646/22823/22938/22976/23168/23476/26053/26097/26147/54623/54904/55183/55904/56254/57343/80312/94104	27
ACC	GO:1903312	negative regulation of mRNA metabolic process	46/5696	66/12611	4.71181e-05	0.00107049	0.000955889	580/1025/1432/1660/1859/1869/1994/2475/3181/3183/3184/3190/3192/4904/5725/6429/6431/6432/6433/6556/6829/7936/8241/8313/8531/8683/9646/9704/9810/9967/10492/10642/10772/10921/10949/11338/23435/26986/27316/51594/55544/56254/79048/79171/79882/90806	46
ACC	GO:0000731	DNA synthesis involved in DNA repair	33/5696	44/12611	5.49745e-05	0.00123919	0.00110653	1032/5111/5424/5425/5426/5427/5429/5980/5982/5983/5984/5985/6117/6118/6119/6233/7311/7316/7353/7415/7486/9100/9768/10459/10714/11201/22890/51455/51514/55666/56897/83932/199990	33
ACC	GO:0040001	establishment of mitotic spindle localization	25/5696	31/12611	5.63641e-05	0.00126555	0.00113006	1058/1639/3837/4085/4926/5080/5347/9181/9183/9700/10120/10121/10253/10403/23332/29899/51203/54820/54908/55755/55968/56647/81565/89958/126353	25
ACC	GO:0006368	transcription elongation from RNA polymerase II promoter	52/5696	77/12611	5.96131e-05	0.00133329	0.00119055	905/1025/2068/2071/2146/2962/2963/2965/2968/3192/4298/4300/4331/4686/5430/5433/5434/5435/5436/5437/5438/5441/6749/6829/6830/6917/6921/6924/7936/8178/8812/9150/9646/10771/11047/11198/22916/23168/23476/25920/29072/51497/51755/54623/55140/55250/55795/79577/80237/84337/123169/165918	52
ACC	GO:0030330	DNA damage response, signal transduction by p53 class mediator	63/5696	97/12611	6.46642e-05	0.0014351	0.00128146	472/545/581/672/675/754/835/891/972/983/995/1017/1263/1647/1859/1869/1874/2033/2305/2810/3276/4194/4282/4582/4848/4849/5111/5325/6154/6591/6790/7023/7027/7029/7832/9100/9125/10397/10498/10769/11200/22976/23019/23028/25904/28984/51147/51512/55367/55571/55702/56950/57060/57472/64844/79733/144455/149628/161742/200734/246175/387893/399473	63
ACC	GO:0050686	negative regulation of mRNA processing	23/5696	28/12611	6.59574e-05	0.00145817	0.00130206	580/1025/1859/3181/3190/5725/6429/6431/6432/6433/6829/7936/8241/8683/9646/9810/10772/10921/11338/27316/56254/79171/79882	23
ACC	GO:0042276	error-prone translesion synthesis	17/5696	19/12611	7.55049e-05	0.0016502	0.00147353	5111/5427/5429/5980/5982/5983/5984/5985/6117/6118/6119/6233/7311/7316/10459/11201/51455	17
ACC	GO:0070987	error-free translesion synthesis	17/5696	19/12611	7.55049e-05	0.0016502	0.00147353	5111/5429/5982/5983/5984/5985/6117/6118/6119/6233/7311/7316/7353/7415/51455/55666/83932	17
ACC	GO:0019985	translesion synthesis	29/5696	38/12611	9.14859e-05	0.00198438	0.00177194	5111/5424/5425/5427/5429/5980/5982/5983/5984/5985/6117/6118/6119/6233/7311/7316/7353/7415/9100/9768/10459/10714/11201/22890/51455/51514/55666/83932/199990	29
ACC	GO:0051569	regulation of histone H3-K4 methylation	20/5696	24/12611	0.000139219	0.00295288	0.00263675	672/1499/1786/2625/4089/4297/7936/9555/9646/9757/22938/22976/23028/23168/26053/54880/55011/55904/63925/140690	20
ACC	GO:2000104	negative regulation of DNA-dependent DNA replication	20/5696	24/12611	0.000139219	0.00295288	0.00263675	604/641/675/2956/3980/4361/7013/7014/8243/8914/9126/11200/26271/29980/50485/51053/54962/84083/84893/91603	20
ACC	GO:0010972	negative regulation of G2/M transition of mitotic cell cycle	51/5696	77/12611	0.000150738	0.00318544	0.00284441	472/641/672/983/990/1112/4361/4998/5682/5684/5685/5686/5687/5690/5691/5693/5695/5700/5704/5706/5707/5708/5709/5711/5715/5717/5718/5719/5721/6790/8091/9212/9344/9861/9978/10197/10213/11073/23194/23198/29933/29980/29997/60561/60672/63967/80279/84446/84936/90381/91603	51
ACC	GO:0031055	chromatin remodeling at centromere	28/5696	37/12611	0.000156465	0.0032704	0.00292027	1058/2491/3020/3021/3070/4678/5928/8363/8365/8607/51773/54069/54107/55166/55320/55355/55839/57082/64105/64946/79019/79172/79682/80152/91687/201254/387103/401541	28
ACC	GO:0000727	double-strand break repair via break-induced replication	11/5696	11/12611	0.000158754	0.00328243	0.00293102	4171/4172/4173/4174/4175/4176/8317/8318/51659/80198/84296	11
ACC	GO:0045814	negative regulation of gene expression, epigenetic	48/5696	72/12611	0.000184469	0.0037734	0.00336943	1786/1788/2146/3005/3009/3020/3021/3146/3159/3720/4524/5252/5928/5987/7290/7703/8318/8351/8352/8353/8355/8357/8363/8365/8520/8726/8971/9355/9555/10933/22823/22880/23304/23347/23512/25842/26147/29028/51535/54454/55183/58487/80314/84444/84759/653604/100048912/100124700	48
ACC	GO:0043631	RNA polyadenylation	32/5696	44/12611	0.000192201	0.00391763	0.00349821	1025/1479/2926/3297/6626/6829/7936/8189/9646/9810/10914/11051/11052/22828/25962/26986/29894/51585/51692/53981/54623/55149/55339/56254/64852/64895/79577/79869/79882/80336/87178/123169	32
ACC	GO:0034401	chromatin organization involved in regulation of transcription	60/5696	94/12611	0.000197568	0.00401278	0.00358318	1111/1499/1786/1788/2146/3005/3009/3020/3021/3070/3146/3159/4152/4524/5253/6602/6839/7175/7290/7703/8091/8289/8318/8351/8352/8353/8355/8357/8363/8365/8520/8726/8932/8971/9757/9869/10155/10933/11176/22880/23304/23347/23378/25842/29028/51535/53615/54454/55183/57343/57492/57673/80312/80336/84337/84444/84759/653604/100048912/100124700	60
ACC	GO:0006513	protein monoubiquitination	41/5696	60/12611	0.000239481	0.0047963	0.00428282	329/867/1642/4591/5071/6015/6045/7251/7324/7703/8452/9646/9810/9978/10277/23429/29089/29128/51322/51514/54623/54880/54926/55284/55658/56254/56852/56970/57599/57697/63893/79577/84108/84333/84541/84678/84759/84861/90850/123169/165918	41
ACC	GO:0008334	histone mRNA metabolic process	19/5696	23/12611	0.000259396	0.0051414	0.00459098	472/4686/5394/5976/6628/6634/6635/6636/6637/6741/7884/22916/25888/27257/51692/53981/54512/55149/167227	19
ACC	GO:0010971	positive regulation of G2/M transition of mitotic cell cycle	19/5696	23/12611	0.000259396	0.0051414	0.00459098	595/891/983/993/994/995/5087/5889/5890/7480/8317/8766/9525/23476/26271/51514/55920/57504/80174	19
ACC	GO:0006296	nucleotide-excision repair, DNA incision, 5'-to lesion	27/5696	36/12611	0.000265532	0.00524494	0.00468343	142/1642/2067/2068/2071/2073/2965/2968/4913/5111/5424/5425/5982/5983/5984/5985/6117/6118/6119/6233/7311/7316/7507/8451/9557/9978/10714	27
ACC	GO:0006383	transcription by RNA polymerase III	34/5696	48/12611	0.000280644	0.00552446	0.00493302	661/672/2475/2972/2975/2976/5434/5435/5437/5441/6617/6618/6619/6621/6738/6908/7702/8178/9328/9329/9330/9519/9533/10178/10625/11128/27297/55290/57521/57680/79664/84524/170506/171568	34
ACC	GO:0043543	protein acylation	118/5696	206/12611	0.000287629	0.00560451	0.0050045	86/406/672/675/1111/1386/1810/2033/2625/2648/2932/3054/3066/3670/3976/4089/4297/4582/4836/5105/5447/6418/6591/6871/6877/6880/7703/7862/8089/8193/8260/8464/8520/8536/8607/8877/8888/8986/9329/9397/9425/9913/10445/10474/10626/10629/10664/10856/10891/10933/11091/11143/11177/22976/23326/23774/26053/26122/26155/26471/27097/27154/29801/51104/51125/51147/51176/51304/51773/53615/54107/54556/54934/55011/55…	118
ACC	GO:0031056	regulation of histone modification	75/5696	123/12611	0.000287636	0.00560451	0.0050045	472/604/672/891/1025/1111/1499/1786/2625/2648/3009/3670/3720/3976/4089/4297/4302/4524/4582/5252/5587/5927/6418/6591/6830/6871/7422/7936/8726/8986/9320/9555/9646/9733/9757/9810/10270/10474/10664/10856/10891/11143/22823/22938/22976/23028/23081/23168/23476/25865/26053/26097/26147/26155/26993/51366/54623/54880/54904/55011/55183/55209/55611/55818/55904/56254/56848/57343/63925/64324/80312/94104/120892/…	75
ACC	GO:0002068	glandular epithelial cell development	17/5696	20/12611	0.000289981	0.00563111	0.00502826	406/572/652/654/1021/2931/2932/5080/5915/5916/5991/6009/6608/7474/28514/51092/137964	17
ACC	GO:0006271	DNA strand elongation involved in DNA replication	15/5696	17/12611	0.000298505	0.00577713	0.00515864	1763/3978/3980/4172/4173/4176/5111/5425/5426/5983/5984/9837/10714/51659/84296	15
ACC	GO:0034508	centromere complex assembly	31/5696	43/12611	0.000313812	0.00595311	0.00531578	1058/1062/1063/2491/3020/3021/3070/4678/5928/8363/8365/8607/23126/51773/54069/54107/55166/55320/55355/55839/57082/64105/64946/79019/79172/79682/80152/91687/201254/387103/401541	31
ACC	GO:0051568	histone H3-K4 methylation	31/5696	43/12611	0.000313812	0.00595311	0.00531578	672/1499/1786/2625/4089/4297/5926/5929/6018/7936/9070/9555/9646/9757/11091/22938/22976/23028/23168/26053/30827/54880/55011/55870/55904/57673/63925/80335/84661/140690/200424	31
ACC	GO:0010390	histone monoubiquitination	22/5696	28/12611	0.000323469	0.00609607	0.00544344	1642/4591/6015/6045/7324/7703/9646/9810/23429/29128/51322/54623/54880/56254/56970/79577/84108/84333/84678/84759/123169/165918	22
ACC	GO:0031440	regulation of mRNA 3'-end processing	22/5696	28/12611	0.000323469	0.00609607	0.00544344	580/891/1025/3297/4686/6626/6829/7936/9646/9810/10914/11051/11052/22916/25962/54623/56254/79577/79869/79882/123169/170506	22
ACC	GO:0045005	DNA-dependent DNA replication maintenance of fidelity	28/5696	38/12611	0.000338405	0.00635671	0.00567617	641/675/1025/1663/1763/4361/4796/5111/5424/5426/5888/7486/8914/9984/10189/29980/50485/54962/55159/57697/64710/84083/84893/91603/146956/201254/253714/348654	28
ACC	GO:0034080	CENP-A containing nucleosome assembly	25/5696	33/12611	0.000345608	0.00644985	0.00575934	1058/2491/4678/5928/8363/8365/8607/51773/54069/54107/55166/55320/55355/55839/57082/64105/64946/79019/79172/79682/80152/91687/201254/387103/401541	25
ACC	GO:0061641	CENP-A containing chromatin organization	25/5696	33/12611	0.000345608	0.00644985	0.00575934	1058/2491/4678/5928/8363/8365/8607/51773/54069/54107/55166/55320/55355/55839/57082/64105/64946/79019/79172/79682/80152/91687/201254/387103/401541	25
ACC	GO:0034770	histone H4-K20 methylation	10/5696	10/12611	0.000351821	0.00654455	0.00584391	672/5926/7468/11137/51111/51742/57673/64324/84787/387893	10
ACC	GO:0006367	transcription initiation from RNA polymerase II promoter	94/5696	160/12611	0.000354087	0.00656546	0.00586257	190/581/595/865/891/892/983/1025/1385/1810/1870/2063/2068/2071/2649/2958/2960/2961/2962/2963/2965/2968/3146/4150/4306/4331/4853/4929/5430/5433/5434/5435/5436/5437/5438/5441/5465/5469/5704/5706/5728/5915/5916/6095/6097/6256/6662/6722/6873/6875/6877/6880/6882/6908/6910/7003/7004/7025/7068/7101/7181/7182/7480/7596/8013/8148/8463/9440/9441/9477/9572/9794/9967/9970/9975/10001/10062/10155/10413/10629/1…	94
ACC	GO:0008156	negative regulation of DNA replication	26/5696	35/12611	0.00044695	0.0082342	0.00735266	545/604/641/675/990/2956/3980/4361/7013/7014/7270/8243/8914/9126/11200/23063/23560/26271/29980/50485/51053/54962/84083/84893/91603/146059	26
ACC	GO:0006297	nucleotide-excision repair, DNA gap filling	18/5696	22/12611	0.00047949	0.00877741	0.00783772	3978/3980/5111/5424/5425/5426/5982/5983/5984/5985/6117/6118/6119/6233/7311/7316/7515/10714	18
ACC	GO:0035883	enteroendocrine cell differentiation	18/5696	22/12611	0.00047949	0.00877741	0.00783772	406/572/652/654/1021/2931/2932/3280/3651/4221/5080/5991/6009/6608/7474/28514/51092/222546	18
ACC	GO:0006473	protein acetylation	97/5696	167/12611	0.00050099	0.00914188	0.00816317	86/406/672/675/1111/1386/1810/2033/2625/2648/2932/3054/3066/3670/3976/4089/4297/4582/5105/5447/6418/6591/6871/6877/6880/7703/7862/8089/8193/8260/8464/8520/8536/8607/8877/8888/8986/9329/9913/10445/10474/10626/10629/10664/10856/10891/10933/11091/11143/11177/22976/23326/23774/26053/26122/26155/26471/27097/27154/51147/51176/51773/53615/54107/54556/54934/55011/55140/55209/55257/55274/55683/55689/55929…	97
ACC	GO:0036503	ERAD pathway	56/5696	89/12611	0.000543099	0.0098789	0.00882128	550/1861/3300/3309/4287/4780/5071/5706/6048/6388/6782/7184/7327/7353/7415/9097/9354/10206/10277/10299/10613/10869/10956/11253/23190/23392/23753/26232/27248/29954/29979/51035/51136/51465/51528/51608/54431/54788/55139/55298/55432/55666/55741/55829/57333/79089/79139/80020/80267/83590/84236/84447/91304/91319/118424/337867	56
ACC	GO:0006284	base-excision repair	27/5696	37/12611	0.000560014	0.0101394	0.00905393	1763/2074/2237/3159/3978/3980/4595/4913/5111/5423/5424/5426/5428/6117/6118/6119/6188/6996/7486/7507/7515/8091/8930/10038/23201/27343/55247	27
ACC	GO:0042274	ribosomal small subunit biogenesis	39/5696	58/12611	0.00056095	0.0101394	0.00905393	705/3921/5822/6169/6193/6194/6201/6202/6204/6209/6217/6218/6223/6227/6229/8780/9277/9790/11056/25926/25983/26284/27341/28987/51077/55127/55226/55720/55813/64963/65095/79954/83732/84916/84946/85395/88745/91695/115939	39
ACC	GO:0000132	establishment of mitotic spindle orientation	21/5696	27/12611	0.000569796	0.010267	0.00916788	1058/1639/4085/4926/5080/5347/9181/9183/10120/10121/10253/10403/29899/54820/54908/55755/55968/56647/81565/89958/126353	21
ACC	GO:0032968	positive regulation of transcription elongation from RNA polymerase II promoter	14/5696	16/12611	0.000587806	0.0104604	0.00934052	1025/2962/2963/6830/6921/8178/9646/11198/23168/23476/51755/54623/79577/123169	14
ACC	GO:0042790	nucleolar large rRNA transcription by RNA polymerase I	14/5696	16/12611	0.000587806	0.0104604	0.00934052	1663/2475/4141/4691/6597/9014/9555/10849/11137/25926/29997/55011/64425/64768	14
ACC	GO:0016574	histone ubiquitination	31/5696	44/12611	0.000603807	0.010712	0.00956519	1025/1642/4591/6015/6045/7324/7703/9320/9646/9810/23028/23304/23326/23429/23512/29128/51322/51366/54623/54880/55611/56254/56970/57332/79577/84108/84333/84678/84759/123169/165918	31
ACC	GO:0010833	telomere maintenance via telomere lengthening	46/5696	71/12611	0.000660139	0.0116039	0.0103616	142/472/545/908/1499/1736/3104/3178/3181/3183/3192/4361/4751/5394/5570/5594/5609/5888/6117/7013/7014/7015/7520/8658/9212/9887/9894/10574/10575/10576/10694/10728/11284/22948/23381/26277/55135/55226/55505/64858/65057/79991/80119/80351/167227/170506	46
ACC	GO:0017148	negative regulation of translation	69/5696	114/12611	0.000664933	0.0116525	0.010405	283/468/678/811/1613/1719/1965/1978/1979/1981/2058/2886/3184/3609/3646/3658/3692/4076/4343/4691/4848/4849/5610/5936/5976/5997/6093/6188/6470/6726/7072/7175/7248/7298/7832/8087/8507/8570/8637/9125/9470/9475/9698/9775/10236/10399/10492/10642/10644/10658/23019/23034/23112/23521/25904/26058/26523/27102/27161/51441/54517/55095/55147/56339/170506/192669/246175/399664/645683	69
ACC	GO:0022616	DNA strand elongation	19/5696	24/12611	0.000716068	0.0123975	0.0110702	1763/3978/3980/4172/4173/4176/4361/5111/5425/5426/5983/5984/7015/9837/10714/51659/64710/64858/84296	19
ACC	GO:0033119	negative regulation of RNA splicing	19/5696	24/12611	0.000716068	0.0123975	0.0110702	1859/3181/3190/5725/6207/6231/6429/6431/6432/6433/8241/8683/9991/10772/10921/11338/27316/58155/79171	19
ACC	GO:1904837	beta-catenin-TCF complex assembly	19/5696	24/12611	0.000716068	0.0123975	0.0110702	1499/2033/4221/4609/5929/6597/6934/7015/7088/7089/7090/8313/8607/9070/51176/51339/79577/123169/283149	19
ACC	GO:0051291	protein heterooligomerization	62/5696	101/12611	0.000729271	0.0125881	0.0112405	329/972/989/1104/1277/1278/1292/2193/2547/2643/2644/2743/2782/2885/2902/3039/3040/3043/3265/3416/3611/3643/4038/4144/5310/5564/5590/6240/6241/6406/7186/7248/8351/8352/8353/8355/8357/8363/8365/8737/8915/9076/9127/9818/10056/10320/11035/11051/11052/23590/23636/51719/53371/55752/58525/64375/64376/79869/83862/114898/114904/144404	62
ACC	GO:0006278	RNA-dependent DNA biosynthetic process	42/5696	64/12611	0.000756826	0.0129471	0.011561	472/545/908/1499/1736/3178/3183/3192/4361/4751/5394/5478/5570/5594/5609/6117/7011/7013/7014/7015/7520/8658/9212/9887/9894/10574/10575/10576/10694/10728/11284/22948/23381/26277/55135/55226/55505/65057/79991/80119/80351/167227	42
ACC	GO:0043044	ATP-dependent chromatin remodeling	42/5696	64/12611	0.000756826	0.0129471	0.011561	86/1058/1107/2491/3066/3183/4678/5757/5928/6597/6599/8289/8363/8365/8607/8932/9219/23198/51773/53615/54069/54107/54617/55166/55320/55355/55839/55929/57082/57680/64105/64946/79019/79172/79682/80152/91687/93973/144108/201254/387103/401541	42
ACC	GO:1903313	positive regulation of mRNA metabolic process	42/5696	64/12611	0.000756826	0.0129471	0.011561	678/891/3184/3297/4343/4686/5436/5976/6093/6434/6625/7832/8570/9475/9588/9698/9967/10236/10262/11051/22916/22938/23019/23112/26058/26528/26986/27161/27316/29896/51441/54623/55147/56339/56829/79577/87178/123169/170506/246175/399664/494115	42
ACC	GO:0031297	replication fork processing	22/5696	29/12611	0.000767848	0.0130194	0.0116256	641/675/1025/1663/1763/4361/4796/5111/5888/7486/9984/10189/50485/55159/57697/64710/84083/84893/146956/201254/253714/348654	22
ACC	GO:0043486	histone exchange	29/5696	41/12611	0.000816372	0.0138015	0.0123239	1058/2491/4678/5757/5928/8363/8365/8607/23198/51773/54069/54107/55166/55320/55355/55839/55929/57082/64105/64946/79019/79172/79682/80152/91687/144108/201254/387103/401541	29
ACC	GO:0000380	alternative mRNA splicing, via spliceosome	43/5696	66/12611	0.000824838	0.0139037	0.0124152	1660/1859/3178/3191/3192/4670/5725/5936/6421/6426/6427/6428/6429/6431/6432/6433/6434/8241/8683/9589/9733/9939/9967/10179/10181/10521/10657/10658/10772/10921/10929/23028/23543/27316/29890/55234/58517/64783/79005/83759/84081/84991/146713	43
ACC	GO:0006379	mRNA cleavage	17/5696	21/12611	0.000878678	0.0147249	0.0131485	1479/2081/4343/4686/5438/6038/10898/11051/11052/22916/27161/29894/51585/51692/53981/64852/79869	17
ACC	GO:0045292	mRNA cis splicing, via spliceosome	23/5696	31/12611	0.000990159	0.0164018	0.0146459	4686/5936/6426/6427/6428/6429/6431/6432/6433/6631/8683/9092/9416/10772/10929/11168/22916/23020/28960/51503/55015/55660/83759	23
ACC	GO:1902751	positive regulation of cell cycle G2/M phase transition	20/5696	26/12611	0.000994556	0.0164273	0.0146686	595/891/983/993/994/995/5087/5889/5890/7480/8317/8766/9525/23476/26271/51514/55920/57504/79915/80174	20
ACC	GO:0060218	hematopoietic stem cell differentiation	46/5696	72/12611	0.00103314	0.0169188	0.0151075	25/865/1021/1106/2068/2625/4297/4780/5610/5682/5684/5685/5686/5687/5690/5691/5693/5695/5700/5704/5706/5707/5708/5709/5711/5715/5717/5718/5719/5721/6422/6722/6929/6938/7161/7520/9861/10197/10213/10413/23198/51441/54517/56339/83737/121340	46
ACC	GO:0051383	kinetochore organization	15/5696	18/12611	0.00103813	0.0169523	0.0151374	1058/1062/1063/10051/10403/10592/23126/55839/64105/64946/80152/81620/83540/201254/387103	15
ACC	GO:0033683	nucleotide-excision repair, DNA incision	27/5696	38/12611	0.00110396	0.0179761	0.0160516	142/1642/2067/2068/2071/2073/2965/2968/4913/5111/5424/5425/5982/5983/5984/5985/6117/6118/6119/6233/7311/7316/7507/8451/9557/9978/10714	27
ACC	GO:0016573	histone acetylation	76/5696	129/12611	0.0011155	0.0179868	0.0160612	86/672/675/1111/1386/1810/2033/2625/2648/3054/3670/3976/4089/4297/4582/6418/6591/6871/6877/6880/7703/7862/8089/8193/8464/8520/8607/8888/8986/9329/9913/10445/10474/10626/10629/10664/10856/10891/10933/11091/11143/11177/22976/23326/23774/26053/26122/26155/27097/27154/51147/51176/51773/53615/54107/54556/54934/55011/55140/55209/55257/55274/55683/55689/55929/56655/56848/57634/57673/64769/80218/80314/84…	76
ACC	GO:1901836	regulation of transcription of nucleolar large rRNA by RNA polymerase I	11/5696	12/12611	0.00111713	0.0179868	0.0160612	1663/2475/4141/4691/6597/9555/11137/25926/29997/55011/64768	11
ACC	GO:0018393	internal peptidyl-lysine acetylation	78/5696	133/12611	0.00116185	0.0186545	0.0166574	86/672/675/1111/1386/1810/2033/2625/2648/3054/3670/3976/4089/4297/4582/5447/6418/6591/6871/6877/6880/7703/7862/8089/8193/8464/8520/8607/8888/8986/9329/9913/10445/10474/10626/10629/10664/10856/10891/10933/11091/11143/11177/22976/23326/23774/26053/26122/26155/27097/27154/51147/51176/51773/53615/54107/54556/54934/55011/55140/55209/55257/55274/55683/55689/55929/56655/56848/57634/57673/64769/79969/802…	78
ACC	GO:0006998	nuclear envelope organization	32/5696	47/12611	0.00125706	0.0201269	0.0179722	891/983/1639/1861/2010/2852/5347/5518/5520/5578/6683/7443/8815/9133/9631/9688/10783/23141/23175/23353/23399/23435/23592/26993/27348/55968/79188/80346/81565/165324/221035/221496	32
ACC	GO:0000381	regulation of alternative mRNA splicing, via spliceosome	37/5696	56/12611	0.00127508	0.0203587	0.0181792	1859/3178/3191/3192/5725/5936/6426/6427/6428/6429/6431/6432/6434/8241/8683/9589/9733/9939/9967/10179/10181/10521/10657/10658/10772/10921/10929/23543/27316/29890/55234/58517/64783/83759/84081/84991/146713	37
ACC	GO:0033120	positive regulation of RNA splicing	21/5696	28/12611	0.00130878	0.0205542	0.0183537	1859/2081/3303/4686/5295/5430/6434/6625/8882/9588/9967/10262/11338/22927/22938/23064/26528/27316/29896/92906/494115	21
ACC	GO:0034243	regulation of transcription elongation from RNA polymerase II promoter	21/5696	28/12611	0.00130878	0.0205542	0.0183537	1025/2146/2962/2963/3192/6830/6921/7936/8178/9646/10771/11198/23168/23476/25920/51497/51755/54623/79577/123169/165918	21
ACC	GO:0070198	protein localization to chromosome, telomeric region	21/5696	28/12611	0.00130878	0.0205542	0.0183537	472/545/675/908/1736/7013/7014/7015/7520/8658/9555/10574/10575/10576/10694/22948/26277/26354/55135/65057/80351	21
ACC	GO:0006360	transcription by RNA polymerase I	38/5696	58/12611	0.00139637	0.0218702	0.0195288	468/1663/2068/2071/2074/2475/2965/2968/4141/4331/4691/5434/5435/5437/5441/5457/5469/6597/6908/7270/9014/9015/9533/9555/10849/11137/11176/23160/25885/25926/29997/55011/55127/64425/64768/79101/84128/84172	38
ACC	GO:0032210	regulation of telomere maintenance via telomerase	33/5696	49/12611	0.00141395	0.0220255	0.0196675	472/545/908/1499/1736/3178/3183/3192/4751/5394/5570/5594/5609/7013/7014/7520/8658/9212/9887/10574/10575/10576/10694/11284/22948/23381/26277/55226/65057/79991/80119/80351/167227	33
ACC	GO:0072698	protein localization to microtubule cytoskeleton	33/5696	49/12611	0.00141395	0.0220255	0.0196675	636/2804/2932/3192/4130/4926/6491/6790/7272/9419/9585/9851/10464/10540/10615/22919/22924/22994/23636/26005/29887/51104/51134/55125/55722/55968/57787/58489/64770/81610/81926/84376/146057	33
ACC	GO:0097549	chromatin organization involved in negative regulation of transcription	52/5696	84/12611	0.00144894	0.0225095	0.0200996	1786/1788/2146/3005/3009/3020/3021/3070/3146/3159/4152/4524/5253/6839/7175/7290/7703/8091/8318/8351/8352/8353/8355/8357/8363/8365/8520/8726/8932/8971/9869/10155/10933/11176/22880/23304/23347/23378/25842/29028/51535/53615/54454/55183/57343/57673/80312/84444/84759/653604/100048912/100124700	52
ACC	GO:0071459	protein localization to chromosome, centromeric region	16/5696	20/12611	0.00159496	0.0246447	0.0220063	983/1058/7272/9183/9184/9212/10403/10664/27085/54908/55166/55920/57082/81620/83903/91272	16
ACC	GO:0006475	internal protein amino acid acetylation	80/5696	138/12611	0.00161114	0.0248279	0.0221699	86/672/675/1111/1386/1810/2033/2625/2648/3054/3670/3976/4089/4297/4582/5105/5447/6418/6591/6871/6877/6880/7703/7862/8089/8193/8260/8464/8520/8607/8888/8986/9329/9913/10445/10474/10626/10629/10664/10856/10891/10933/11091/11143/11177/22976/23326/23774/26053/26122/26155/27097/27154/51147/51176/51773/53615/54107/54556/54934/55011/55140/55209/55257/55274/55683/55689/55929/56655/56848/57634/57673/64769…	80
ACC	GO:0007004	telomere maintenance via telomerase	40/5696	62/12611	0.00164132	0.0251581	0.0224648	472/545/908/1499/1736/3178/3183/3192/4361/4751/5394/5570/5594/5609/6117/7013/7014/7015/7520/8658/9212/9887/9894/10574/10575/10576/10694/10728/11284/22948/23381/26277/55135/55226/55505/65057/79991/80119/80351/167227	40
ACC	GO:1902036	regulation of hematopoietic stem cell differentiation	40/5696	62/12611	0.00164132	0.0251581	0.0224648	25/865/1021/2625/4297/4780/5610/5682/5684/5685/5686/5687/5690/5691/5693/5695/5700/5704/5706/5707/5708/5709/5711/5715/5717/5718/5719/5721/6929/6938/7161/9861/10197/10213/10413/23198/51441/54517/56339/83737	40
ACC	GO:0006376	mRNA splice site selection	22/5696	30/12611	0.00165228	0.0252588	0.0225546	6426/6431/6433/6631/7536/8175/8683/10291/10658/10772/10946/11168/22889/23064/27316/51631/51747/55015/55692/57461/58155/91746	22
ACC	GO:0050685	positive regulation of mRNA processing	19/5696	25/12611	0.00171888	0.0262072	0.0234016	891/3297/4686/6434/6625/9588/9967/10262/11051/22916/22938/26528/27316/29896/54623/79577/123169/170506/494115	19
ACC	GO:0044380	protein localization to cytoskeleton	35/5696	53/12611	0.00173612	0.0264001	0.0235737	636/2804/2932/3192/4130/4926/6491/6790/7272/9419/9585/9851/10464/10540/10615/22919/22924/22994/23636/26005/29887/51104/51134/54443/55125/55722/55968/57787/58489/64770/81610/81926/84376/146057/286077	35
ACC	GO:0061418	regulation of transcription from RNA polymerase II promoter in response to hypoxia	41/5696	64/12611	0.00176394	0.0267175	0.0238572	405/2033/2056/4780/5682/5684/5685/5686/5687/5690/5691/5693/5695/5700/5704/5706/5707/5708/5709/5711/5715/5717/5718/5719/5721/6233/6921/7311/7316/7422/7428/8453/9861/9978/10197/10213/23198/25994/54583/55662/112398	41
ACC	GO:0018023	peptidyl-lysine trimethylation	26/5696	37/12611	0.00176629	0.0267175	0.0238572	4297/5926/6839/9646/9757/11137/23081/23168/23476/29072/51111/51742/54093/54904/55011/55904/57343/57673/63925/79609/79723/80335/84787/196483/200424/751071	26
ACC	GO:1901992	positive regulation of mitotic cell cycle phase transition	42/5696	66/12611	0.00188607	0.0283058	0.0252754	595/891/894/898/983/990/993/994/995/1981/5087/5889/5890/6868/7015/7480/8317/8318/8451/8452/8766/9510/9525/9700/9787/11065/11331/23476/26271/27085/28984/29766/51433/51514/51529/55904/55920/57504/57521/80174/81620/113130	42
ACC	GO:0034620	cellular response to unfolded protein	73/5696	125/12611	0.00192369	0.0287204	0.0256456	37/439/440/467/468/578/581/595/666/811/1491/1616/1639/1663/1965/2033/2081/2135/2931/3068/3297/3303/3304/3309/3312/3576/4780/5071/5295/5526/5610/5771/6734/6745/6782/7094/7184/7415/7709/8440/8614/8720/9797/10106/10113/10130/10399/10488/10525/10897/22926/26353/26608/27230/30001/30827/51182/51283/51726/51768/55298/55432/55829/56005/58477/79139/80279/84236/84447/84699/91319/116138/135138	73
ACC	GO:0070200	establishment of protein localization to telomere	14/5696	17/12611	0.00193787	0.0288572	0.0257679	472/545/675/908/1736/7013/7015/10574/10575/10576/10694/22948/55135/65057	14
ACC	GO:0090501	RNA phosphodiester bond hydrolysis	76/5696	131/12611	0.00202011	0.0298498	0.0266542	283/1479/2021/2081/2237/3669/4343/4686/4848/5394/5438/5511/6038/6227/7247/7257/9156/9692/9941/10248/10535/10556/10557/10799/10898/10940/11051/11052/11340/22894/22916/23016/23019/23246/23404/25996/26523/27161/28960/28987/29894/51010/51013/51077/51585/51692/53981/54487/54512/54913/57472/64852/65080/65095/79002/79033/79042/79707/79869/80153/81875/87178/88745/90806/114034/116461/118460/122651/129563/…	76
ACC	GO:0009124	nucleoside monophosphate biosynthetic process	27/5696	39/12611	0.00204981	0.0302111	0.0269767	100/158/159/272/353/471/790/1635/1716/1854/2618/3251/3614/3615/5198/5471/6470/7083/7298/7371/7372/8833/51727/54963/81602/151531/377841	27
ACC	GO:0006282	regulation of DNA repair	63/5696	106/12611	0.00212023	0.0311691	0.0278322	142/672/1025/1111/1660/1663/2074/2140/2305/2521/3014/3146/3297/4862/5111/5429/5531/5591/5888/6118/6188/7014/7335/7336/7398/7468/7515/7913/8091/8313/8451/8505/8914/9320/10097/10155/10459/10635/23028/23201/23347/29072/29086/51366/51720/54537/55010/55135/55183/55611/55719/56893/56897/57332/64210/79000/83933/84501/84893/116028/165918/254225/401720	63
ACC	GO:0000463	maturation of LSU-rRNA from tricistronic rRNA transcript (SSU-rRNA, 5.8S rRNA, LSU-rRNA)	12/5696	14/12611	0.0022263	0.0320781	0.0286439	6129/8886/9326/11224/23246/23481/23560/55759/79707/84154/117246/285855	12
ACC	GO:0006268	DNA unwinding involved in DNA replication	12/5696	14/12611	0.0022263	0.0320781	0.0286439	641/3159/4171/4173/4175/4176/5888/5965/6117/7486/9401/56652	12
ACC	GO:0048308	organelle inheritance	12/5696	14/12611	0.0022263	0.0320781	0.0286439	983/1263/2801/5594/5604/5605/6811/7443/7534/8729/10494/11235	12
ACC	GO:0048313	Golgi inheritance	12/5696	14/12611	0.0022263	0.0320781	0.0286439	983/1263/2801/5594/5604/5605/6811/7443/7534/8729/10494/11235	12
ACC	GO:0051571	positive regulation of histone H3-K4 methylation	12/5696	14/12611	0.0022263	0.0320781	0.0286439	672/1499/1786/4089/4297/7936/9646/22938/22976/23168/26053/55904	12
ACC	GO:1902653	secondary alcohol biosynthetic process	38/5696	59/12611	0.00222672	0.0320781	0.0286439	31/39/47/335/1581/1595/1717/2194/2222/2224/3156/3157/3422/3638/3837/3930/4047/4597/4598/4800/5447/5901/6309/6319/6667/6713/6721/7555/8720/9453/10613/10682/11161/22937/50814/51141/51478/91734	38
ACC	GO:0006384	transcription initiation from RNA polymerase III promoter	10/5696	11/12611	0.00228249	0.0326363	0.0291423	2972/2975/6908/9328/9329/9330/9519/27297/55290/171568	10
ACC	GO:0071027	nuclear RNA surveillance	10/5696	11/12611	0.00228249	0.0326363	0.0291423	1797/5394/8559/11340/23016/23404/51010/54512/55795/118460	10
ACC	GO:0071028	nuclear mRNA surveillance	10/5696	11/12611	0.00228249	0.0326363	0.0291423	1797/5394/8559/11340/23016/23404/51010/54512/55795/118460	10
ACC	GO:0043966	histone H3 acetylation	33/5696	50/12611	0.0023668	0.0336742	0.0300691	672/675/1111/1810/2625/2648/3976/4089/4297/6871/6880/7862/8464/8888/9913/10474/10626/10629/11091/11143/23774/27097/27154/51147/51176/54107/55011/55689/56655/56848/64769/84289/117143	33
ACC	GO:0051496	positive regulation of stress fiber assembly	29/5696	43/12611	0.00263585	0.0371345	0.033159	25/335/387/389/961/998/2475/4088/4771/5217/5879/6385/6422/7043/7046/7248/7984/8477/8829/9270/9475/9647/10174/22843/28984/29109/50507/51466/54361	29
ACC	GO:1905268	negative regulation of chromatin organization	29/5696	43/12611	0.00263585	0.0371345	0.033159	672/1786/3005/3009/3159/3720/4302/5252/5253/5927/6418/6830/8971/9320/9555/22823/23028/23081/25842/26155/29028/51366/54454/54880/55011/55611/55818/56848/80312	29
ACC	GO:0018394	peptidyl-lysine acetylation	80/5696	140/12611	0.00279645	0.0390396	0.0348601	86/672/675/1111/1386/1810/2033/2625/2648/3054/3066/3670/3976/4089/4297/4582/5447/6418/6591/6871/6877/6880/7703/7862/8089/8193/8464/8520/8607/8888/8986/9329/9913/10445/10474/10626/10629/10664/10856/10891/10933/11091/11143/11177/22976/23326/23774/26053/26122/26155/27097/27154/51147/51176/51773/53615/54107/54556/54934/55011/55140/55209/55257/55274/55683/55689/55929/56655/56848/57634/57673/64769/7996…	80
ACC	GO:0060236	regulation of mitotic spindle organization	25/5696	36/12611	0.00279825	0.0390396	0.0348601	1213/1639/1778/3192/3303/3304/4733/4926/5310/5347/7175/8243/8480/9126/9525/10274/10460/22974/23636/29899/79187/79598/79866/84722/126731	25
ACC	GO:0006335	DNA replication-dependent nucleosome assembly	15/5696	19/12611	0.00286498	0.0395921	0.0353535	4678/5928/8208/8351/8352/8353/8355/8357/8363/8365/8520/10036/25842/55723/79711	15
ACC	GO:0034723	DNA replication-dependent nucleosome organization	15/5696	19/12611	0.00286498	0.0395921	0.0353535	4678/5928/8208/8351/8352/8353/8355/8357/8363/8365/8520/10036/25842/55723/79711	15
ACC	GO:0048025	negative regulation of mRNA splicing, via spliceosome	15/5696	19/12611	0.00286498	0.0395921	0.0353535	1859/3181/3190/5725/6429/6431/6432/6433/8241/8683/10772/10921/11338/27316/79171	15
ACC	GO:0006303	double-strand break repair via nonhomologous end joining	42/5696	67/12611	0.0028654	0.0395921	0.0353535	472/580/672/2067/2547/3014/3297/3980/4292/4361/5423/5591/7336/7341/7405/7468/7515/7520/8091/8363/8365/8924/9656/10213/10459/22976/22992/23347/27343/29086/51588/51720/54537/55135/55183/64421/64858/79000/79840/91419/165918/286257	42
ACC	GO:0006695	cholesterol biosynthetic process	37/5696	58/12611	0.00323827	0.0445301	0.0397628	31/39/47/335/1581/1595/1717/2194/2222/2224/3156/3157/3422/3638/3837/3930/4047/4597/4598/4800/5447/5901/6309/6319/6667/6713/6721/7555/8720/9453/10613/10682/22937/50814/51141/51478/91734	37
ACC	GO:0000726	non-recombinational repair	45/5696	73/12611	0.00331624	0.0452773	0.04043	472/580/672/2067/2547/3014/3297/3980/4292/4361/5423/5591/5932/7336/7341/7405/7468/7515/7520/8091/8363/8365/8924/9656/10213/10459/22976/22992/23347/27343/29086/51444/51588/51720/54537/55135/55183/57109/64421/64858/79000/79840/91419/165918/286257	45
ACC	GO:0009411	response to UV	72/5696	125/12611	0.00336413	0.0458223	0.0409167	142/468/545/578/581/595/675/836/842/847/993/1032/1111/1642/1874/1965/2033/2067/2068/2071/2073/2074/2237/2956/3150/4221/4436/4609/4776/5111/5295/5424/5429/5609/5970/6154/6738/6794/7398/7486/7507/7528/8372/9212/9768/10277/10714/10715/10856/22890/22954/23028/26155/51150/51435/51455/51514/54617/54962/55872/56339/56852/57646/57805/83932/84083/84236/84446/150678/163859/170506/400410	72
ACC	GO:0008630	intrinsic apoptotic signaling pathway in response to DNA damage	56/5696	94/12611	0.00338981	0.0460629	0.0411315	25/472/572/578/581/637/666/672/675/835/842/972/1032/1869/2033/2074/2810/2956/3190/4170/4282/4292/4436/4582/4776/5295/5423/5591/5883/6154/6188/6591/6880/7161/7507/8445/11200/22938/22954/23028/26471/27141/27429/51246/51588/54541/57007/57646/57805/64112/64844/79915/80237/83596/84893/220042	56
ACC	GO:2000573	positive regulation of DNA biosynthetic process	38/5696	60/12611	0.00344977	0.0466571	0.0416621	472/545/908/1499/1736/3082/3178/3181/3184/4609/4751/4931/5570/5594/5609/5982/5983/5984/5985/7520/7919/8658/9212/9314/10574/10575/10576/10694/10728/11284/22948/25865/28984/50507/55135/65057/79075/80351	38
ACC	GO:0003323	type B pancreatic cell development	13/5696	16/12611	0.00357991	0.0474131	0.0423372	406/572/652/654/1021/2931/2932/5991/6009/6608/7474/28514/51092	13
ACC	GO:0009048	dosage compensation by inactivation of X chromosome	13/5696	16/12611	0.00357991	0.0474131	0.0423372	672/3192/5394/5976/9425/10209/23347/29890/56339/64783/84108/84333/91746	13
ACC	GO:0034501	protein localization to kinetochore	13/5696	16/12611	0.00357991	0.0474131	0.0423372	983/7272/9183/9184/9212/10403/27085/54908/55166/55920/57082/81620/83903	13
ACC	GO:0090670	RNA localization to Cajal body	13/5696	16/12611	0.00357991	0.0474131	0.0423372	908/1736/5394/8607/10574/10575/10576/10694/10856/22948/55135/55505/167227	13
ACC	GO:0090671	telomerase RNA localization to Cajal body	13/5696	16/12611	0.00357991	0.0474131	0.0423372	908/1736/5394/8607/10574/10575/10576/10694/10856/22948/55135/55505/167227	13
ACC	GO:0070199	establishment of protein localization to chromosome	19/5696	26/12611	0.00368491	0.0484688	0.0432798	472/545/675/908/1736/3009/7013/7015/9555/10574/10575/10576/10694/10856/22948/55011/55135/65057/222229	19
ACC	GO:0000018	regulation of DNA recombination	48/5696	79/12611	0.0037343	0.0488947	0.0436601	142/604/641/1111/2068/2521/2956/3005/3009/3838/4292/4361/4436/5531/5888/6118/6830/7014/7037/7292/7468/7486/8914/8971/9466/9984/10097/10189/10459/10635/22976/23028/23347/29072/51010/54537/55010/55135/55183/56893/64210/79915/84083/84893/116028/118460/200558/401720	48
ACC	GO:0002067	glandular epithelial cell differentiation	23/5696	33/12611	0.00382595	0.0498675	0.0445288	406/572/652/654/1021/2931/2932/3280/3651/4221/5080/5915/5916/5991/6009/6256/6608/7474/28514/51092/54361/137964/222546	23
CESC	GO:0018126	protein hydroxylation	7/200	22/12341	3.66872e-08	0.000108447	0.000102454	444/5033/5351/5352/8974/54583/283208	7
CESC	GO:0030199	collagen fibril organization	7/200	49/12341	1.27566e-05	0.0188542	0.0178122	871/4017/5033/5351/5352/7837/642658	7
CESC	GO:0019511	peptidyl-proline hydroxylation	4/200	13/12341	4.26805e-05	0.0420545	0.0397303	5033/8974/54583/283208	4
HNSC	GO:0050863	regulation of T cell activation	25/182	244/12358	1.68139e-14	7.33646e-12	6.56627e-12	914/916/921/923/939/940/1236/1493/1845/3662/3718/3932/5133/7133/7535/11005/22914/27240/29851/54440/54900/55423/64926/151888/201633	25
HNSC	GO:0050851	antigen receptor-mediated signaling pathway	19/182	200/12358	1.07719e-10	2.16929e-08	1.94155e-08	915/916/917/919/930/940/973/974/1236/1493/1845/3635/3932/5693/5713/7535/54900/84174/115352	19
HNSC	GO:0050870	positive regulation of T cell activation	17/182	159/12358	1.69874e-10	2.96586e-08	2.6545e-08	916/921/923/939/940/1236/1493/3718/3932/5133/7535/22914/29851/54440/55423/64926/151888	17
HNSC	GO:1903037	regulation of leukocyte cell-cell adhesion	20/182	231/12358	1.8126e-10	2.96586e-08	2.6545e-08	916/921/923/939/940/1236/1493/1845/3718/3932/5133/7535/22914/29851/54440/54900/55423/64926/151888/201633	20
HNSC	GO:1903039	positive regulation of leukocyte cell-cell adhesion	17/182	171/12358	5.35441e-10	8.24578e-08	7.38013e-08	916/921/923/939/940/1236/1493/3718/3932/5133/7535/22914/29851/54440/55423/64926/151888	17
HNSC	GO:0030217	T cell differentiation	17/182	182/12358	1.41334e-09	1.68187e-07	1.50531e-07	914/915/916/917/939/940/1235/1236/1493/3662/3718/3932/7535/10538/11005/54440/114836	17
HNSC	GO:0050852	T cell receptor signaling pathway	13/182	165/12358	9.44905e-07	6.68584e-05	5.98395e-05	915/916/917/919/940/1236/1493/1845/3635/3932/5693/5713/7535	13
HNSC	GO:0045619	regulation of lymphocyte differentiation	11/182	128/12358	2.85303e-06	0.000196559	0.000175924	914/939/940/1493/3635/3662/3718/7535/11005/54440/115352	11
HNSC	GO:0050670	regulation of lymphocyte proliferation	12/182	163/12358	5.0859e-06	0.000341408	0.000305566	916/923/940/1493/3635/3718/7133/7293/7535/54440/64926/115352	12
HNSC	GO:0032944	regulation of mononuclear cell proliferation	12/182	164/12358	5.41782e-06	0.000354596	0.00031737	916/923/940/1493/3635/3718/7133/7293/7535/54440/64926/115352	12
HNSC	GO:0050864	regulation of B cell activation	9/182	96/12358	1.15292e-05	0.000718653	0.000643208	930/939/940/1493/3635/7293/54440/84174/115352	9
HNSC	GO:0033077	T cell differentiation in thymus	7/182	55/12358	1.49622e-05	0.000890248	0.000796788	915/916/917/940/1235/1236/7535	7
HNSC	GO:0045580	regulation of T cell differentiation	9/182	102/12358	1.88829e-05	0.00107468	0.000961862	914/939/940/1493/3662/3718/7535/11005/54440	9
HNSC	GO:0050671	positive regulation of lymphocyte proliferation	9/182	102/12358	1.88829e-05	0.00107468	0.000961862	916/923/940/3718/7293/7535/54440/64926/115352	9
HNSC	GO:0032946	positive regulation of mononuclear cell proliferation	9/182	103/12358	2.04317e-05	0.00113809	0.00101861	916/923/940/3718/7293/7535/54440/64926/115352	9
HNSC	GO:0042100	B cell proliferation	7/182	61/12358	2.9863e-05	0.00153478	0.00137365	930/973/1493/3635/7293/54440/115352	7
HNSC	GO:0046631	alpha-beta T cell activation	9/182	108/12358	2.98983e-05	0.00153478	0.00137365	916/940/3662/3718/7535/10538/54440/64926/114836	9
HNSC	GO:0050853	B cell receptor signaling pathway	6/182	45/12358	4.74946e-05	0.00230261	0.00206088	930/973/974/1493/3932/115352	6
HNSC	GO:0030183	B cell differentiation	8/182	91/12358	5.68976e-05	0.00270832	0.002424	930/939/973/974/3635/3718/4914/115352	8
HNSC	GO:0007204	positive regulation of cytosolic calcium ion concentration	13/182	242/12358	6.00335e-05	0.00280657	0.00251193	643/930/1235/1236/2150/2833/3932/8698/9446/10663/27334/84636/286530	13
HNSC	GO:0019724	B cell mediated immunity	8/182	92/12358	6.15426e-05	0.00282664	0.00252989	930/939/940/1235/3635/4049/10538/84174	8
HNSC	GO:0042098	T cell proliferation	10/182	149/12358	6.99201e-05	0.00315605	0.00282472	916/923/940/1493/3718/7133/7293/7535/54440/64926	10
HNSC	GO:0042129	regulation of T cell proliferation	9/182	123/12358	8.32778e-05	0.00369528	0.00330734	916/923/940/1493/3718/7133/7535/54440/64926	9
HNSC	GO:0046641	positive regulation of alpha-beta T cell proliferation	4/182	17/12358	9.32358e-05	0.00406491	0.00363817	916/940/7535/64926	4
HNSC	GO:0042102	positive regulation of T cell proliferation	7/182	74/12358	0.000104887	0.00406491	0.00363817	916/923/940/3718/7535/54440/64926	7
HNSC	GO:0046634	regulation of alpha-beta T cell activation	7/182	74/12358	0.000104887	0.00406491	0.00363817	916/940/3662/3718/7535/54440/64926	7
HNSC	GO:0051480	regulation of cytosolic calcium ion concentration	13/182	268/12358	0.000167644	0.00636076	0.005693	643/930/1235/1236/2150/2833/3932/8698/9446/10663/27334/84636/286530	13
HNSC	GO:0006874	cellular calcium ion homeostasis	15/182	348/12358	0.000195644	0.00711384	0.00636702	643/930/1235/1236/2150/2833/3932/8614/8698/9446/10663/27334/54499/84636/286530	15
HNSC	GO:0072507	divalent inorganic cation homeostasis	16/182	391/12358	0.00021633	0.00765339	0.00684993	643/930/1235/1236/2150/2833/3932/8614/8698/9446/10663/27334/54499/84636/147138/286530	16
HNSC	GO:0050871	positive regulation of B cell activation	6/182	60/12358	0.000243206	0.00837781	0.0074983	939/940/3635/7293/54440/115352	6
HNSC	GO:0055074	calcium ion homeostasis	15/182	359/12358	0.000273628	0.00918408	0.00821992	643/930/1235/1236/2150/2833/3932/8614/8698/9446/10663/27334/54499/84636/286530	15
HNSC	GO:0016064	immunoglobulin mediated immune response	7/182	89/12358	0.000333738	0.0103945	0.00930329	930/939/940/1235/3635/4049/10538	7
HNSC	GO:0002286	T cell activation involved in immune response	6/182	64/12358	0.000346946	0.0103945	0.00930329	2150/3662/3683/3718/10538/114836	6
HNSC	GO:0042415	norepinephrine metabolic process	3/182	10/12358	0.000349396	0.0103945	0.00930329	1621/3642/26002	3
HNSC	GO:0072540	T-helper 17 cell lineage commitment	3/182	10/12358	0.000349396	0.0103945	0.00930329	3662/10538/114836	3
HNSC	GO:0035025	positive regulation of Rho protein signal transduction	4/182	24/12358	0.000384038	0.0110485	0.00988858	2150/27334/84636/286530	4
HNSC	GO:0051482	positive regulation of cytosolic calcium ion concentration involved in phospholipase C-activating G protein-coupled signaling pathway	4/182	24/12358	0.000384038	0.0110485	0.00988858	2150/27334/84636/286530	4
HNSC	GO:0072503	cellular divalent inorganic cation homeostasis	15/182	374/12358	0.000422341	0.0120184	0.0107567	643/930/1235/1236/2150/2833/3932/8614/8698/9446/10663/27334/54499/84636/286530	15
HNSC	GO:0046640	regulation of alpha-beta T cell proliferation	4/182	26/12358	0.000528037	0.0147064	0.0131625	916/940/7535/64926	4
HNSC	GO:0030888	regulation of B cell proliferation	5/182	46/12358	0.000551082	0.0150285	0.0134508	1493/3635/7293/54440/115352	5
HNSC	GO:0045086	positive regulation of interleukin-2 biosynthetic process	3/182	12/12358	0.000626783	0.0167441	0.0149863	916/940/3662	3
HNSC	GO:0006875	cellular metal ion homeostasis	16/182	441/12358	0.000810188	0.0200632	0.0179569	643/930/1235/1236/2150/2833/3932/4738/8614/8698/9446/10663/27334/54499/84636/286530	16
HNSC	GO:0046633	alpha-beta T cell proliferation	4/182	29/12358	0.000810498	0.0200632	0.0179569	916/940/7535/64926	4
HNSC	GO:0046635	positive regulation of alpha-beta T cell activation	5/182	50/12358	0.000812336	0.0200632	0.0179569	916/940/7535/54440/64926	5
HNSC	GO:0019722	calcium-mediated signaling	9/182	170/12358	0.000924277	0.0221996	0.0198691	643/916/1235/1236/2833/7535/9446/10663/84174	9
HNSC	GO:0033209	tumor necrosis factor-mediated signaling pathway	8/182	137/12358	0.000943324	0.0224511	0.0200942	939/2150/4049/4050/5693/5713/7133/7293	8
HNSC	GO:0046632	alpha-beta T cell differentiation	6/182	78/12358	0.00100307	0.0229023	0.020498	3662/3718/7535/10538/54440/114836	6
HNSC	GO:0002295	T-helper cell lineage commitment	3/182	14/12358	0.00101477	0.0229023	0.020498	3662/10538/114836	3
HNSC	GO:0009713	catechol-containing compound biosynthetic process	3/182	14/12358	0.00101477	0.0229023	0.020498	1621/3642/26002	3
HNSC	GO:0042423	catecholamine biosynthetic process	3/182	14/12358	0.00101477	0.0229023	0.020498	1621/3642/26002	3
HNSC	GO:0055065	metal ion homeostasis	17/182	496/12358	0.00104674	0.0234219	0.0209631	643/930/1235/1236/2150/2833/3932/4738/8614/8698/9446/10663/27334/54499/84636/147138/286530	17
HNSC	GO:0046579	positive regulation of Ras protein signal transduction	5/182	54/12358	0.0011564	0.0254409	0.0227701	2150/4914/27334/84636/286530	5
HNSC	GO:0043373	CD4-positive, alpha-beta T cell lineage commitment	3/182	15/12358	0.00125478	0.0269757	0.0241437	3662/10538/114836	3
HNSC	GO:0043367	CD4-positive, alpha-beta T cell differentiation	5/182	55/12358	0.00125708	0.0269757	0.0241437	3662/3718/10538/54440/114836	5
HNSC	GO:0007254	JNK cascade	9/182	181/12358	0.00143505	0.0300557	0.0269004	939/1236/1845/2150/6504/7476/10044/11184/22943	9
HNSC	GO:0046330	positive regulation of JNK cascade	7/182	114/12358	0.00146559	0.0304517	0.0272548	939/1236/2150/6504/7476/11184/22943	7
HNSC	GO:0009712	catechol-containing compound metabolic process	4/182	34/12358	0.00149447	0.0305665	0.0273576	1621/3251/3642/26002	4
HNSC	GO:0045076	regulation of interleukin-2 biosynthetic process	3/182	16/12358	0.0015277	0.0310041	0.0277492	916/940/3662	3
HNSC	GO:0051057	positive regulation of small GTPase mediated signal transduction	5/182	59/12358	0.00172552	0.034484	0.0308639	2150/4914/27334/84636/286530	5
HNSC	GO:0002363	alpha-beta T cell lineage commitment	3/182	17/12358	0.00183509	0.0354536	0.0317316	3662/10538/114836	3
HNSC	GO:0072539	T-helper 17 cell differentiation	3/182	17/12358	0.00183509	0.0354536	0.0317316	3662/10538/114836	3
HNSC	GO:0046328	regulation of JNK cascade	8/182	152/12358	0.00183613	0.0354536	0.0317316	939/1236/1845/2150/6504/7476/11184/22943	8
HNSC	GO:0097028	dendritic cell differentiation	4/182	36/12358	0.00185529	0.0354536	0.0317316	1236/2150/3662/10538	4
HNSC	GO:0002708	positive regulation of lymphocyte mediated immunity	6/182	88/12358	0.00187545	0.0355793	0.0318441	940/4049/4068/22914/54440/114836	6
HNSC	GO:0002706	regulation of lymphocyte mediated immunity	7/182	121/12358	0.00206403	0.038875	0.0347939	940/4049/4068/7133/22914/54440/114836	7
HNSC	GO:0072538	T-helper 17 type immune response	3/182	19/12358	0.00255904	0.0458874	0.0410701	3662/10538/114836	3
HNSC	GO:0030003	cellular cation homeostasis	16/182	497/12358	0.00276387	0.0492232	0.0440557	643/930/1235/1236/2150/2833/3932/4738/8614/8698/9446/10663/27334/54499/84636/286530	16
KICH	GO:0000280	nuclear division	58/367	324/12606	8.50358e-30	8.61696e-27	7.84418e-27	675/699/701/990/991/1062/1063/2177/3619/3832/3833/4085/4288/4292/4605/5888/6790/7153/7272/7283/8438/9055/9134/9212/9319/9585/9787/9928/10051/10615/11004/11130/11200/22974/23397/25788/26271/29893/51143/51203/51529/54443/55143/63979/64105/79075/83540/83903/84250/84722/90417/113130/146909/146956/151246/151648/259266/286151	58
KICH	GO:0048285	organelle fission	59/367	359/12606	3.13634e-28	2.38362e-25	2.16985e-25	675/699/701/990/991/1062/1063/2177/3619/3832/3833/4085/4288/4292/4605/5888/6790/7153/7272/7283/8438/9055/9134/9212/9319/9585/9787/9928/10051/10615/11004/11130/11200/22974/23397/25788/26271/29893/51143/51203/51529/54443/55143/63979/64105/79075/83540/83903/84250/84722/90417/113115/113130/146909/146956/151246/151648/259266/286151	59
KICH	GO:0006260	DNA replication	49/367	243/12606	1.10998e-27	6.7487e-25	6.14347e-25	641/672/675/890/983/990/1017/3978/4171/4172/4176/4998/5425/5426/5557/5888/5982/5984/5985/6240/6241/8317/8914/9134/9768/9837/10535/10714/10721/11124/11169/11200/23649/26271/27000/29980/51514/54962/55388/63967/79075/79915/80119/80174/83695/144455/146956/157570/222229	49
KICH	GO:0006261	DNA-dependent DNA replication	35/367	141/12606	3.46847e-23	9.58558e-21	8.72593e-21	641/675/990/1017/3978/4171/4172/4176/4998/5425/5426/5557/5888/5982/5984/5985/8317/8914/9134/9837/10714/10721/11169/11200/23649/26271/29980/54962/55388/79075/79915/80174/144455/146956/222229	35
KICH	GO:0006281	DNA repair	57/367	470/12606	1.60298e-20	4.06088e-18	3.69669e-18	641/672/675/983/1017/1032/2177/2187/2305/3978/4171/4172/4176/4292/4521/4968/5379/5383/5395/5425/5426/5888/5982/5984/5985/6917/7336/7398/7516/8317/8438/8914/9319/9768/10535/10635/10714/10721/10980/11169/11200/25788/29089/29128/51366/51514/55010/55215/56852/63967/63979/80119/83695/84250/113130/146956/157570	57
KICH	GO:1901990	regulation of mitotic cell cycle phase transition	49/367	358/12606	5.96959e-20	1.39597e-17	1.27077e-17	641/672/699/701/835/983/990/991/993/1017/1019/1031/1032/1062/1063/2146/4085/4998/5690/5691/5692/5933/6790/7272/7283/8317/9212/9319/9787/9793/9928/10733/11200/22974/25904/26271/29980/51143/51512/51514/51529/54443/60561/63967/79915/80174/113130/144455/203068	49
KICH	GO:1901991	negative regulation of mitotic cell cycle phase transition	33/367	198/12606	2.71037e-16	4.57751e-14	4.16699e-14	641/672/699/701/835/983/990/991/1017/1019/1031/1032/1063/2146/4085/4998/5690/5691/5692/5933/6790/7272/9212/9319/11200/25904/26271/29980/51143/51512/60561/63967/144455	33
KICH	GO:0000082	G1/S transition of mitotic cell cycle	32/367	211/12606	1.26014e-14	1.32097e-12	1.20251e-12	835/983/990/993/1017/1019/1031/1032/1719/1978/2146/4171/4172/4176/4998/5426/5557/5933/6241/6502/6790/8317/9134/9928/11200/23649/25904/26271/51512/55388/128239/144455	32
KICH	GO:1902749	regulation of cell cycle G2/M phase transition	29/367	180/12606	4.65323e-14	4.28661e-12	3.90218e-12	641/672/983/990/993/1017/1019/1063/4998/5690/5691/5692/6790/7283/8317/9212/9793/9928/10733/22974/26271/29980/51512/51514/60561/63967/79915/80174/203068	29
KICH	GO:0000086	G2/M transition of mitotic cell cycle	31/367	212/12606	9.23679e-14	8.25877e-12	7.51811e-12	641/672/890/983/990/993/1017/1019/1063/2305/4998/5690/5691/5692/6502/6790/7283/8317/9212/9793/9928/10733/11200/22974/26271/29980/51514/60561/63967/80174/203068	31
KICH	GO:0010389	regulation of G2/M transition of mitotic cell cycle	27/367	166/12606	2.83512e-13	2.46251e-11	2.24167e-11	641/672/983/990/993/1017/1019/1063/4998/5690/5691/5692/6790/7283/8317/9212/9793/9928/10733/22974/26271/29980/51514/60561/63967/80174/203068	27
KICH	GO:0006275	regulation of DNA replication	21/367	96/12606	3.36118e-13	2.83833e-11	2.58378e-11	641/675/890/983/990/1017/5982/5984/5985/8317/8914/11124/11200/26271/29980/54962/79075/79915/80174/144455/157570	21
KICH	GO:0090329	regulation of DNA-dependent DNA replication	15/367	53/12606	1.57367e-11	1.22666e-09	1.11665e-09	641/675/1017/5982/5984/5985/8317/8914/11200/26271/29980/54962/79075/80174/144455	15
KICH	GO:0006302	double-strand break repair	28/367	211/12606	1.68524e-11	1.28078e-09	1.16592e-09	641/672/675/2187/2305/4171/4172/4176/4292/4968/5888/7336/7516/8317/8438/8914/9319/10635/10721/11200/25788/51366/55010/63979/84250/113130/146956/157570	28
KICH	GO:0030071	regulation of mitotic metaphase/anaphase transition	14/367	47/12606	3.50953e-11	2.60219e-09	2.36882e-09	699/701/990/991/1062/1063/4085/7272/9212/9319/9787/26271/51143/51529	14
KICH	GO:1902099	regulation of metaphase/anaphase transition of cell cycle	14/367	48/12606	4.82522e-11	3.49254e-09	3.17932e-09	699/701/990/991/1062/1063/4085/7272/9212/9319/9787/26271/51143/51529	14
KICH	GO:0033047	regulation of mitotic sister chromatid segregation	15/367	58/12606	6.56073e-11	4.44439e-09	4.04581e-09	699/701/990/991/1062/1063/4085/7272/9212/9319/9787/26271/51143/51529/84250	15
KICH	GO:0007091	metaphase/anaphase transition of mitotic cell cycle	14/367	49/12606	6.57887e-11	4.44439e-09	4.04581e-09	699/701/990/991/1062/1063/4085/7272/9212/9319/9787/26271/51143/51529	14
KICH	GO:0010965	regulation of mitotic sister chromatid separation	14/367	49/12606	6.57887e-11	4.44439e-09	4.04581e-09	699/701/990/991/1062/1063/4085/7272/9212/9319/9787/26271/51143/51529	14
KICH	GO:0006270	DNA replication initiation	12/367	34/12606	9.54581e-11	5.80386e-09	5.28336e-09	990/1017/4171/4172/4176/4998/5426/5557/9134/23649/55388/222229	12
KICH	GO:0051783	regulation of nuclear division	23/367	154/12606	1.03196e-10	6.15128e-09	5.59963e-09	699/701/990/991/1062/1063/3832/4085/4288/6790/7272/9212/9319/9585/9787/26271/51143/51203/51529/54443/84250/113130/286151	23
KICH	GO:0071103	DNA conformation change	30/367	273/12606	3.65775e-10	2.05918e-08	1.87451e-08	641/983/3065/4171/4172/4176/5888/5982/5984/5985/7153/8438/9837/10051/10721/11339/23397/25788/51203/54892/55723/56852/57082/64105/64946/79075/80119/91687/113130/387103	30
KICH	GO:0006310	DNA recombination	26/367	232/12606	3.75069e-09	1.96588e-07	1.78958e-07	641/672/675/2187/3838/4171/4172/4176/4292/5888/7153/7516/8317/8438/8914/9319/10635/10721/25788/29893/55010/63979/79915/80119/83695/146956	26
KICH	GO:0006271	DNA strand elongation involved in DNA replication	8/367	16/12606	5.02148e-09	2.58734e-07	2.3553e-07	3978/4172/4176/5425/5426/5984/9837/10714	8
KICH	GO:0000725	recombinational repair	18/367	119/12606	9.40406e-09	4.68661e-07	4.26631e-07	641/672/675/2187/4171/4172/4176/5888/7516/8317/8438/8914/10635/10721/25788/55010/63979/83695	18
KICH	GO:0045841	negative regulation of mitotic metaphase/anaphase transition	10/367	32/12606	1.41048e-08	6.49675e-07	5.91411e-07	699/701/991/1063/4085/7272/9212/9319/26271/51143	10
KICH	GO:1902100	negative regulation of metaphase/anaphase transition of cell cycle	10/367	32/12606	1.41048e-08	6.49675e-07	5.91411e-07	699/701/991/1063/4085/7272/9212/9319/26271/51143	10
KICH	GO:2000816	negative regulation of mitotic sister chromatid separation	10/367	32/12606	1.41048e-08	6.49675e-07	5.91411e-07	699/701/991/1063/4085/7272/9212/9319/26271/51143	10
KICH	GO:0033048	negative regulation of mitotic sister chromatid segregation	10/367	34/12606	2.72163e-08	1.19909e-06	1.09156e-06	699/701/991/1063/4085/7272/9212/9319/26271/51143	10
KICH	GO:0000724	double-strand break repair via homologous recombination	17/367	118/12606	5.1277e-08	2.05108e-06	1.86714e-06	641/672/675/2187/4171/4172/4176/5888/7516/8317/8438/8914/10635/10721/25788/55010/63979	17
KICH	GO:0032392	DNA geometric change	16/367	108/12606	8.53475e-08	3.32636e-06	3.02805e-06	641/4171/4172/4176/5888/5982/5984/5985/7153/8438/9837/10721/25788/56852/79075/80119	16
KICH	GO:0051784	negative regulation of nuclear division	11/367	48/12606	9.42493e-08	3.53726e-06	3.22003e-06	699/701/991/1063/4085/7272/9212/9319/26271/51143/286151	11
KICH	GO:0022616	DNA strand elongation	8/367	22/12606	1.07009e-07	3.96717e-06	3.61139e-06	3978/4172/4176/5425/5426/5984/9837/10714	8
KICH	GO:0007094	mitotic spindle assembly checkpoint	9/367	30/12606	1.13457e-07	4.01058e-06	3.6509e-06	699/701/991/1063/4085/7272/9212/9319/51143	9
KICH	GO:0032508	DNA duplex unwinding	15/367	100/12606	1.8366e-07	6.27332e-06	5.71072e-06	641/4171/4172/4176/5888/5982/5984/5985/7153/9837/10721/25788/56852/79075/80119	15
KICH	GO:0044773	mitotic DNA damage checkpoint	14/367	87/12606	1.93013e-07	6.51955e-06	5.93487e-06	641/835/983/1017/6790/11200/25904/29980/51512/54962/60561/63967/144455/146956	14
KICH	GO:2001251	negative regulation of chromosome organization	16/367	115/12606	2.08651e-07	6.9703e-06	6.3452e-06	672/699/701/991/1063/4085/4171/7153/7272/9212/9319/26271/29028/51143/51366/80119	16
KICH	GO:1902750	negative regulation of cell cycle G2/M phase transition	14/367	89/12606	2.5837e-07	8.26785e-06	7.52638e-06	641/672/983/990/4998/5690/5691/5692/6790/9212/29980/51514/60561/63967	14
KICH	GO:1902751	positive regulation of cell cycle G2/M phase transition	8/367	25/12606	3.35233e-07	1.05063e-05	9.56406e-06	983/993/1019/8317/26271/51514/79915/80174	8
KICH	GO:0010972	negative regulation of G2/M transition of mitotic cell cycle	13/367	80/12606	4.71262e-07	1.44942e-05	1.31944e-05	641/672/983/990/4998/5690/5691/5692/6790/9212/29980/60561/63967	13
KICH	GO:0031145	anaphase-promoting complex-dependent catabolic process	12/367	69/12606	6.12046e-07	1.86062e-05	1.69376e-05	701/983/991/1017/4085/5690/5691/5692/6790/9212/26271/51529	12
KICH	GO:0051383	kinetochore organization	7/367	19/12606	6.23692e-07	1.87725e-05	1.7089e-05	1062/1063/10051/64105/64946/83540/387103	7
KICH	GO:0006301	postreplication repair	10/367	48/12606	9.43709e-07	2.78532e-05	2.53553e-05	672/5425/5982/5984/5985/7336/9768/10714/51514/56852	10
KICH	GO:0071897	DNA biosynthetic process	18/367	163/12606	1.23029e-06	3.59623e-05	3.27371e-05	1032/1063/3978/4015/5425/5426/5982/5984/5985/9212/9768/10714/10721/23649/27000/51514/79075/80119	18
KICH	GO:2000134	negative regulation of G1/S transition of mitotic cell cycle	13/367	90/12606	1.88936e-06	5.47016e-05	4.97959e-05	835/983/1017/1019/1031/1032/2146/5933/6790/11200/25904/51512/144455	13
KICH	GO:0010971	positive regulation of G2/M transition of mitotic cell cycle	7/367	22/12606	1.95723e-06	5.61319e-05	5.10979e-05	983/993/1019/8317/26271/51514/80174	7
KICH	GO:0072422	signal transduction involved in DNA damage checkpoint	11/367	64/12606	2.04292e-06	5.73881e-05	5.22415e-05	672/835/983/1017/6790/11200/25904/51512/51514/60561/144455	11
KICH	GO:1901992	positive regulation of mitotic cell cycle phase transition	11/367	65/12606	2.3958e-06	6.56148e-05	5.97304e-05	983/990/993/1019/8317/9787/26271/51514/51529/80174/113130	11
KICH	GO:1902807	negative regulation of cell cycle G1/S phase transition	13/367	92/12606	2.43557e-06	6.61083e-05	6.01796e-05	835/983/1017/1019/1031/1032/2146/5933/6790/11200/25904/51512/144455	13
KICH	GO:0006282	regulation of DNA repair	14/367	107/12606	2.56122e-06	6.89036e-05	6.27242e-05	672/2187/2305/4968/5888/7336/7398/8914/10635/10721/51366/55010/63979/84250	14
KICH	GO:0006297	nucleotide-excision repair, DNA gap filling	7/367	23/12606	2.74355e-06	7.31613e-05	6.66001e-05	3978/5425/5426/5982/5984/5985/10714	7
KICH	GO:0033044	regulation of chromosome organization	24/367	285/12606	3.08644e-06	8.15893e-05	7.42722e-05	672/699/701/990/991/1062/1063/4085/4171/4288/7153/7272/9212/9319/9787/26147/26271/29028/51143/51366/51529/80119/84250/113130	24
KICH	GO:2000779	regulation of double-strand break repair	11/367	67/12606	3.26502e-06	8.5566e-05	7.78923e-05	2187/2305/4968/5888/8914/10635/10721/51366/55010/63979/84250	11
KICH	GO:1902806	regulation of cell cycle G1/S phase transition	16/367	141/12606	3.3716e-06	8.7604e-05	7.97475e-05	835/983/990/1017/1019/1031/1032/2146/5933/6790/9928/11200/25904/51512/81610/144455	16
KICH	GO:0006298	mismatch repair	8/367	33/12606	3.50886e-06	9.03978e-05	8.22908e-05	3978/4292/5379/5383/5395/5425/10535/10714	8
KICH	GO:0000731	DNA synthesis involved in DNA repair	9/367	45/12606	4.77534e-06	0.000121992	0.000111051	1032/5425/5426/5982/5984/5985/9768/10714/51514	9
KICH	GO:2000045	regulation of G1/S transition of mitotic cell cycle	15/367	129/12606	5.03833e-06	0.000126583	0.000115231	835/983/990/1017/1019/1031/1032/2146/5933/6790/9928/11200/25904/51512/144455	15
KICH	GO:2000104	negative regulation of DNA-dependent DNA replication	7/367	25/12606	5.11539e-06	0.000127466	0.000116034	641/675/8914/11200/26271/29980/54962	7
KICH	GO:0008156	negative regulation of DNA replication	8/367	35/12606	5.6526e-06	0.000139706	0.000127177	641/675/990/8914/11200/26271/29980/54962	8
KICH	GO:0034502	protein localization to chromosome	11/367	74/12606	8.85031e-06	0.000208566	0.000189861	675/983/2146/7272/9212/57082/83903/84250/113130/157570/222229	11
KICH	GO:0045005	DNA-dependent DNA replication maintenance of fidelity	8/367	38/12606	1.08815e-05	0.000252518	0.000229872	641/675/5426/5888/8914/29980/54962/146956	8
KICH	GO:0031572	G2 DNA damage checkpoint	7/367	28/12606	1.16844e-05	0.000267073	0.000243121	641/672/983/29980/51514/60561/63967	7
KICH	GO:0000018	regulation of DNA recombination	11/367	78/12606	1.48427e-05	0.000334236	0.000304261	641/2187/3838/4292/5888/8914/10635/10721/55010/63979/79915	11
KICH	GO:1902402	signal transduction involved in mitotic DNA damage checkpoint	9/367	52/12606	1.65627e-05	0.000359648	0.000327394	835/983/1017/6790/11200/25904/51512/60561/144455	9
KICH	GO:1902403	signal transduction involved in mitotic DNA integrity checkpoint	9/367	52/12606	1.65627e-05	0.000359648	0.000327394	835/983/1017/6790/11200/25904/51512/60561/144455	9
KICH	GO:0000079	regulation of cyclin-dependent protein serine/threonine kinase activity	11/367	80/12606	1.89796e-05	0.000409206	0.000372508	60/641/890/990/993/1019/1031/1032/1163/9134/84722	11
KICH	GO:0035825	homologous recombination	8/367	41/12606	1.96986e-05	0.000418768	0.000381213	4292/5888/7153/8438/9319/25788/29893/146956	8
KICH	GO:0006323	DNA packaging	16/367	166/12606	2.72132e-05	0.000566631	0.000515815	983/3065/4171/7153/10051/11339/23397/51203/54892/55723/57082/64105/64946/91687/113130/387103	16
KICH	GO:0034508	centromere complex assembly	8/367	43/12606	2.8414e-05	0.00058761	0.000534912	1062/1063/11339/57082/64105/64946/91687/387103	8
KICH	GO:0030261	chromosome condensation	7/367	32/12606	3.00408e-05	0.000612912	0.000557945	983/7153/10051/23397/51203/54892/113130	7
KICH	GO:0045740	positive regulation of DNA replication	7/367	32/12606	3.00408e-05	0.000612912	0.000557945	983/1017/8317/11124/79915/80174/144455	7
KICH	GO:0000723	telomere maintenance	14/367	137/12606	4.52759e-05	0.000911515	0.000829769	641/675/5425/5426/5557/5888/5982/5984/5985/9134/9212/10714/23649/80119	14
KICH	GO:0016572	histone phosphorylation	7/367	34/12606	4.56646e-05	0.000913291	0.000831386	890/983/1017/1020/6790/9212/83903	7
KICH	GO:1901796	regulation of signal transduction by p53 class mediator	15/367	155/12606	4.61713e-05	0.000917391	0.000835118	641/672/1017/1020/3065/5982/5984/5985/6790/8805/9212/11200/22974/79915/83695	15
KICH	GO:0034501	protein localization to kinetochore	5/367	15/12606	4.80325e-05	0.00092417	0.000841289	983/7272/9212/57082/83903	5
KICH	GO:0051382	kinetochore assembly	5/367	15/12606	4.80325e-05	0.00092417	0.000841289	1062/1063/64105/64946/387103	5
KICH	GO:0032200	telomere organization	14/367	145/12606	8.44721e-05	0.00158516	0.001443	641/675/5425/5426/5557/5888/5982/5984/5985/9134/9212/10714/23649/80119	14
KICH	GO:0006289	nucleotide-excision repair	11/367	94/12606	8.69495e-05	0.00162164	0.0014762	675/3978/4968/5425/5426/5982/5984/5985/6917/10714/10980	11
KICH	GO:0006977	DNA damage response, signal transduction by p53 class mediator resulting in cell cycle arrest	8/367	50/12606	8.80775e-05	0.00162276	0.00147723	835/983/1017/6790/11200/25904/51512/144455	8
KICH	GO:0036297	interstrand cross-link repair	8/367	50/12606	8.80775e-05	0.00162276	0.00147723	2177/2187/5888/7398/10635/29089/55215/146956	8
KICH	GO:0030330	DNA damage response, signal transduction by p53 class mediator	11/367	95/12606	9.58188e-05	0.00175475	0.00159738	672/675/835/983/1017/2305/6790/11200/25904/51512/144455	11
KICH	GO:0019985	translesion synthesis	7/367	38/12606	9.69111e-05	0.00176413	0.00160592	5425/5982/5984/5985/9768/10714/51514	7
KICH	GO:0072431	signal transduction involved in mitotic G1 DNA damage checkpoint	8/367	51/12606	0.00010185	0.00183209	0.00166778	835/983/1017/6790/11200/25904/51512/144455	8
KICH	GO:1902400	intracellular signal transduction involved in G1 DNA damage checkpoint	8/367	51/12606	0.00010185	0.00183209	0.00166778	835/983/1017/6790/11200/25904/51512/144455	8
KICH	GO:0000727	double-strand break repair via break-induced replication	4/367	10/12606	0.000129137	0.00225618	0.00205385	4171/4172/4176/8317	4
KICH	GO:0044380	protein localization to cytoskeleton	8/367	53/12606	0.000134763	0.00234102	0.00213108	6491/6790/7272/9585/10615/54443/64770/81610	8
KICH	GO:0010569	regulation of double-strand break repair via homologous recombination	7/367	40/12606	0.000136176	0.00235213	0.00214118	2187/5888/8914/10635/10721/55010/63979	7
KICH	GO:0007095	mitotic G2 DNA damage checkpoint	5/367	19/12606	0.000168932	0.00288512	0.00262638	641/983/29980/60561/63967	5
KICH	GO:0071459	protein localization to chromosome, centromeric region	5/367	19/12606	0.000168932	0.00288512	0.00262638	983/7272/9212/57082/83903	5
KICH	GO:0031571	mitotic G1 DNA damage checkpoint	8/367	56/12606	0.000200189	0.00334381	0.00304394	835/983/1017/6790/11200/25904/51512/144455	8
KICH	GO:0006336	DNA replication-independent nucleosome assembly	7/367	43/12606	0.000218365	0.00360777	0.00328422	11339/55723/57082/64105/64946/91687/387103	7
KICH	GO:0044783	G1 DNA damage checkpoint	8/367	57/12606	0.000227056	0.00373109	0.00339648	835/983/1017/6790/11200/25904/51512/144455	8
KICH	GO:0034724	DNA replication-independent nucleosome organization	7/367	44/12606	0.000253272	0.0041395	0.00376827	11339/55723/57082/64105/64946/91687/387103	7
KICH	GO:0006978	DNA damage response, signal transduction by p53 class mediator resulting in transcription of p21 class mediator	4/367	12/12606	0.00029061	0.00459771	0.00418538	672/675/2305/11200	4
KICH	GO:2000105	positive regulation of DNA-dependent DNA replication	4/367	12/12606	0.00029061	0.00459771	0.00418538	1017/8317/80174/144455	4
KICH	GO:0009411	response to UV	12/367	127/12606	0.000328487	0.00512103	0.00466177	675/993/1032/7398/9212/9768/10714/51514/54962/55872/56852/83695	12
KICH	GO:0034080	CENP-A containing nucleosome assembly	6/367	33/12606	0.000332548	0.00513171	0.00467149	11339/57082/64105/64946/91687/387103	6
KICH	GO:0061641	CENP-A containing chromatin organization	6/367	33/12606	0.000332548	0.00513171	0.00467149	11339/57082/64105/64946/91687/387103	6
KICH	GO:0006268	DNA unwinding involved in DNA replication	4/367	13/12606	0.000410169	0.00614243	0.00559157	641/4171/4176/5888	4
KICH	GO:0042772	DNA damage response, signal transduction resulting in transcription	4/367	13/12606	0.000410169	0.00614243	0.00559157	672/675/2305/11200	4
KICH	GO:0072698	protein localization to microtubule cytoskeleton	7/367	49/12606	0.000501171	0.00739593	0.00673265	6491/6790/7272/9585/10615/64770/81610	7
KICH	GO:0090307	mitotic spindle assembly	7/367	49/12606	0.000501171	0.00739593	0.00673265	991/3832/3833/4605/9212/11200/22974	7
KICH	GO:0031055	chromatin remodeling at centromere	6/367	36/12606	0.000543355	0.00794134	0.00722915	11339/57082/64105/64946/91687/387103	6
KICH	GO:0043044	ATP-dependent chromatin remodeling	8/367	65/12606	0.000566679	0.00820335	0.00746766	60/3065/11339/57082/64105/64946/91687/387103	8
KICH	GO:0006283	transcription-coupled nucleotide-excision repair	8/367	66/12606	0.000628785	0.00905927	0.00824682	3978/5425/5982/5984/5985/6917/10714/10980	8
KICH	GO:0033683	nucleotide-excision repair, DNA incision	6/367	38/12606	0.000733316	0.0103687	0.00943886	4968/5425/5982/5984/5985/10714	6
KICH	GO:0000027	ribosomal large subunit assembly	5/367	27/12606	0.000968376	0.0133402	0.0121439	6169/51154/55299/55794/65003	5
KICH	GO:2000780	negative regulation of double-strand break repair	5/367	27/12606	0.000968376	0.0133402	0.0121439	2187/4968/10721/51366/55010	5
KICH	GO:0043486	histone exchange	6/367	41/12606	0.0011099	0.0151305	0.0137735	11339/57082/64105/64946/91687/387103	6
KICH	GO:0008630	intrinsic apoptotic signaling pathway in response to DNA damage	9/367	91/12606	0.00130357	0.0176913	0.0161047	672/675/835/1032/4292/10017/11200/79915/220042	9
KICH	GO:0045910	negative regulation of DNA recombination	5/367	32/12606	0.0021442	0.0283407	0.025799	641/2187/4292/10721/55010	5
KICH	GO:0006312	mitotic recombination	4/367	20/12606	0.00236532	0.0311281	0.0283365	675/4292/5888/25788	4
KICH	GO:0071479	cellular response to ionizing radiation	7/367	64/12606	0.00249722	0.0325818	0.0296598	641/1894/5888/10635/11200/63979/83695	7
KICH	GO:0009206	purine ribonucleoside triphosphate biosynthetic process	6/367	48/12606	0.00255389	0.0330375	0.0300747	205/2023/3615/4830/9605/10476	6
KICH	GO:0042273	ribosomal large subunit biogenesis	7/367	65/12606	0.00273022	0.0351689	0.0320149	6169/10969/51154/51491/55299/55794/65003	7
KICH	GO:0009145	purine nucleoside triphosphate biosynthetic process	6/367	49/12606	0.00284032	0.0363219	0.0330645	205/2023/3615/4830/9605/10476	6
KICH	GO:0065004	protein-DNA complex assembly	13/367	184/12606	0.00284653	0.0363219	0.0330645	1062/1063/4171/4172/4176/5888/11339/55723/57082/64105/64946/91687/387103	13
KICH	GO:0072425	signal transduction involved in G2 DNA damage checkpoint	3/367	11/12606	0.00339307	0.0429789	0.0391245	672/51514/60561	3
KICH	GO:0006296	nucleotide-excision repair, DNA incision, 5'-to lesion	5/367	36/12606	0.00365029	0.0458549	0.0417425	5425/5982/5984/5985/10714	5
KICH	GO:0009144	purine nucleoside triphosphate metabolic process	7/367	69/12606	0.00383284	0.0478982	0.0436026	205/2023/3615/4521/4830/9605/10476	7
KICH	GO:0051785	positive regulation of nuclear division	6/367	52/12606	0.00384446	0.0478982	0.0436026	6790/9787/51203/51529/84250/113130	6
KICH	GO:0071168	protein localization to chromatin	4/367	23/12606	0.00403564	0.0498713	0.0453987	2146/113130/157570/222229	4
KIRC	GO:0046395	carboxylic acid catabolic process	144/6192	221/12582	1.03782e-06	0.00198294	0.00196531	18/30/33/34/35/36/38/51/215/224/275/501/549/586/593/594/642/883/1374/1376/1384/1428/1592/1629/1666/1738/1743/1892/1962/2108/2109/2110/2166/2571/2639/2746/2747/2805/2806/2954/3030/3032/3033/3081/3155/3295/3373/3425/3712/3991/4143/4329/4594/4842/4843/4846/4967/5053/5095/5105/5106/5191/5264/5465/5471/5625/5825/5828/5860/6342/6470/6548/6652/7040/7263/7291/7915/8528/8529/8564/8659/8660/8692/9663/9942/…	144
KIRC	GO:0072329	monocarboxylic acid catabolic process	76/6192	107/12582	3.50141e-06	0.00501752	0.00497293	18/30/33/34/35/38/51/215/224/549/1374/1376/1384/1592/1666/1892/1962/2108/2109/2110/2166/2639/3030/3032/3033/3295/3425/3712/3991/4594/5095/5105/5106/5191/5264/5465/5825/5828/6342/6652/7291/7915/8529/8660/9663/9942/10449/10455/10478/11001/11057/23417/26061/26275/27349/51084/51102/51179/51302/51390/54677/55268/55825/55862/64902/80150/83752/84129/91452/112817/126129/166785/197257/254013/283927/414328	76
KIRC	GO:0016241	regulation of macroautophagy	98/6192	150/12582	4.51239e-05	0.03695	0.0366216	154/523/526/527/528/529/533/535/664/823/1020/2081/2597/2629/2773/3064/3791/4534/5049/5071/5290/5562/5563/5564/5571/5595/5599/5768/5868/5899/6048/7248/7345/7405/7957/8100/8649/8678/8767/8897/9517/9531/9550/9554/9559/9637/9927/10133/10193/10206/10241/10325/10542/10558/10670/11040/22930/23256/23411/23545/25782/26471/27131/27244/29082/29978/29979/51100/51322/51382/51606/54832/55004/55187/55737/55763/…	98
KIRC	GO:0000266	mitochondrial fission	26/6192	31/12582	6.71469e-05	0.0427651	0.042385	664/1352/1723/3791/4137/4600/4976/5071/6773/9650/10891/23259/51024/51537/54332/54471/54708/55737/56181/65018/65084/79594/91137/113115/120892/125170	26
KIRP	GO:0006613	cotranslational protein targeting to membrane	30/521	77/10484	8.18222e-20	3.10433e-16	3.08254e-16	6124/6125/6132/6147/6155/6157/6165/6167/6168/6169/6170/6176/6181/6191/6201/6205/6207/6208/6210/6222/6224/6228/6229/6233/6728/6746/7311/9349/25873/81854	30
KIRP	GO:0006614	SRP-dependent cotranslational protein targeting to membrane	29/521	73/10484	1.79415e-19	3.40351e-16	3.37962e-16	6124/6125/6132/6147/6155/6157/6165/6167/6168/6169/6170/6176/6181/6191/6201/6205/6207/6208/6210/6222/6224/6228/6229/6233/6728/7311/9349/25873/81854	29
KIRP	GO:0045047	protein targeting to ER	30/521	84/10484	1.51004e-18	1.9097e-15	1.89629e-15	3309/6124/6125/6132/6147/6155/6157/6165/6167/6168/6169/6170/6176/6181/6191/6201/6205/6207/6208/6210/6222/6224/6228/6229/6233/6728/7311/9349/25873/81854	30
KIRP	GO:0072599	establishment of protein localization to endoplasmic reticulum	30/521	87/10484	4.75621e-18	4.51126e-15	4.4796e-15	3309/6124/6125/6132/6147/6155/6157/6165/6167/6168/6169/6170/6176/6181/6191/6201/6205/6207/6208/6210/6222/6224/6228/6229/6233/6728/7311/9349/25873/81854	30
KIRP	GO:0070972	protein localization to endoplasmic reticulum	30/521	107/10484	3.03992e-15	2.18111e-12	2.1658e-12	3309/6124/6125/6132/6147/6155/6157/6165/6167/6168/6169/6170/6176/6181/6191/6201/6205/6207/6208/6210/6222/6224/6228/6229/6233/6728/7311/9349/25873/81854	30
KIRP	GO:0000184	nuclear-transcribed mRNA catabolic process, nonsense-mediated decay	28/521	93/10484	3.44931e-15	2.18111e-12	2.1658e-12	4116/6124/6125/6132/6147/6155/6157/6165/6167/6168/6169/6170/6176/6181/6191/6201/6205/6207/6208/6210/6222/6224/6228/6229/6233/7311/9349/25873	28
KIRP	GO:0006612	protein targeting to membrane	34/521	140/10484	4.79737e-15	2.60018e-12	2.58193e-12	3309/4641/6124/6125/6132/6147/6155/6157/6165/6167/6168/6169/6170/6176/6181/6191/6201/6205/6207/6208/6210/6222/6224/6228/6229/6233/6728/6746/7311/9349/25873/81854/84243/158866	34
KIRP	GO:0006402	mRNA catabolic process	46/521	274/10484	1.96229e-13	8.27214e-11	8.21407e-11	3183/4116/5433/5684/5685/5687/5690/5692/5710/5717/6124/6125/6132/6147/6155/6157/6165/6167/6168/6169/6170/6176/6181/6191/6201/6205/6207/6208/6210/6222/6224/6228/6229/6233/7311/7534/8087/8761/9349/10643/25819/25873/51154/54512/57819/550643	46
KIRP	GO:0006401	RNA catabolic process	48/521	302/10484	4.73556e-13	1.79667e-10	1.78406e-10	2237/3183/4116/5433/5684/5685/5687/5690/5692/5710/5717/6124/6125/6132/6147/6155/6157/6165/6167/6168/6169/6170/6176/6181/6191/6201/6205/6207/6208/6210/6222/6224/6228/6229/6233/7311/7534/8087/8761/9349/10643/10940/25819/25873/51154/54512/57819/550643	48
KIRP	GO:0000956	nuclear-transcribed mRNA catabolic process	34/521	163/10484	5.63697e-13	1.94424e-10	1.93059e-10	4116/5433/6124/6125/6132/6147/6155/6157/6165/6167/6168/6169/6170/6176/6181/6191/6201/6205/6207/6208/6210/6222/6224/6228/6229/6233/7311/9349/25819/25873/51154/54512/57819/550643	34
KIRP	GO:0006605	protein targeting	44/521	296/10484	4.69878e-11	1.18848e-08	1.18013e-08	3309/3329/4641/5071/6124/6125/6132/6147/6155/6157/6165/6167/6168/6169/6170/6176/6181/6191/6201/6205/6207/6208/6210/6222/6224/6228/6229/6233/6728/6746/7311/7534/8443/9145/9349/10456/25873/26520/64089/81854/84243/122970/158866/401505	44
KIRP	GO:0043043	peptide biosynthetic process	54/521	486/10484	1.72582e-08	3.0616e-06	3.04011e-06	811/833/1019/1933/1939/4116/5036/5433/6124/6125/6132/6147/6155/6157/6165/6167/6168/6169/6170/6176/6181/6191/6201/6205/6207/6208/6210/6222/6224/6228/6229/6233/7311/8087/8761/8872/8894/9349/10209/10399/10480/10643/10987/25873/29074/51001/51123/51187/54676/54938/64928/65003/65005/79094	54
KIRP	GO:0006412	translation	53/521	473/10484	1.77531e-08	3.0616e-06	3.04011e-06	811/833/1019/1933/1939/4116/5036/5433/6124/6125/6132/6147/6155/6157/6165/6167/6168/6169/6170/6176/6181/6191/6201/6205/6207/6208/6210/6222/6224/6228/6229/6233/7311/8087/8761/8872/8894/9349/10209/10399/10480/10643/10987/25873/29074/51001/51123/51187/54676/54938/64928/65003/65005	53
KIRP	GO:0072657	protein localization to membrane	46/521	448/10484	2.00674e-06	0.000304543	0.000302405	598/2013/2339/2633/3309/4641/5071/6124/6125/6132/6147/6155/6157/6165/6167/6168/6169/6170/6176/6181/6191/6201/6205/6207/6208/6210/6222/6224/6228/6229/6233/6728/6746/7311/7430/7534/8878/9349/10399/25873/26003/26520/81854/84243/158866/246329	46
KIRP	GO:0000027	ribosomal large subunit assembly	8/521	20/10484	2.61322e-06	0.00038133	0.000378653	6125/6147/6169/23212/51154/51187/56342/65003	8
KIRP	GO:0042254	ribosome biogenesis	29/521	228/10484	2.863e-06	0.000402304	0.000399481	705/2091/4931/5036/6125/6147/6155/6165/6169/6201/6208/6229/10360/10813/23076/23212/25879/26574/51001/51118/51154/51187/54512/55127/55651/56342/65003/84128/401466	29
KIRP	GO:0071826	ribonucleoprotein complex subunit organization	22/521	155/10484	7.87712e-06	0.00106735	0.00105986	1939/3326/5433/6125/6147/6169/6208/6632/6633/6634/6635/6636/6637/8444/8894/10480/23212/51154/51187/56342/65003/79833	22
KIRP	GO:0022618	ribonucleoprotein complex assembly	21/521	148/10484	1.26989e-05	0.00166136	0.0016497	1939/3326/5433/6125/6147/6169/6208/6632/6633/6634/6635/6636/6637/8894/10480/23212/51154/51187/56342/65003/79833	21
KIRP	GO:0042255	ribosome assembly	10/521	42/10484	2.93617e-05	0.00371327	0.00368721	6125/6147/6169/6208/23212/51001/51154/51187/56342/65003	10
KIRP	GO:0042273	ribosomal large subunit biogenesis	11/521	53/10484	4.67069e-05	0.00571632	0.0056762	4931/6125/6147/6165/6169/23212/51154/51187/55651/56342/65003	11
KIRP	GO:0006364	rRNA processing	21/521	172/10484	0.000121629	0.0144206	0.0143194	705/2091/4931/5036/6125/6155/6165/6201/6208/6229/10360/10813/23076/23212/25879/51118/51154/54512/55127/55651/84128	21
KIRP	GO:0016072	rRNA metabolic process	21/521	180/10484	0.000231386	0.0266024	0.0264157	705/2091/4931/5036/6125/6155/6165/6201/6208/6229/10360/10813/23076/23212/25879/51118/51154/54512/55127/55651/84128	21
KIRP	GO:0008334	histone mRNA metabolic process	6/521	21/10484	0.000418596	0.0467104	0.0463825	6634/6635/6636/6637/51692/54512	6
LGG	GO:0060333	interferon-gamma-mediated signaling pathway	39/4620	54/10549	2.10966e-05	0.015318	0.0147958	818/2209/2634/3055/3105/3106/3107/3118/3120/3127/3133/3134/3135/3136/3263/3326/3383/3459/3661/3663/3665/4502/4684/4938/4939/4940/5371/5468/5580/5724/6772/7376/7412/7726/8638/10346/11140/53840/84166	39
LGG	GO:0060337	type I interferon signaling pathway	40/4620	56/10549	2.53765e-05	0.015318	0.0147958	103/684/1958/2537/2634/3105/3106/3107/3133/3134/3135/3136/3326/3430/3661/3663/3665/4599/4600/4938/4939/4940/5777/6772/6773/7297/7474/8638/9636/10581/11140/11274/25939/51441/51447/54739/57506/58509/84166/91543	40
LGG	GO:0071357	cellular response to type I interferon	40/4620	56/10549	2.53765e-05	0.015318	0.0147958	103/684/1958/2537/2634/3105/3106/3107/3133/3134/3135/3136/3326/3430/3661/3663/3665/4599/4600/4938/4939/4940/5777/6772/6773/7297/7474/8638/9636/10581/11140/11274/25939/51441/51447/54739/57506/58509/84166/91543	40
LGG	GO:0042098	T cell proliferation	75/4620	120/10549	2.6051e-05	0.015318	0.0147958	199/581/920/923/942/944/970/1051/1493/1499/1503/1794/1947/2064/2281/2697/3071/3133/3135/3485/3570/3586/3594/3606/3620/3718/3965/5294/5573/5699/5777/5788/5880/6194/6304/6375/6441/6556/6850/7001/7037/7040/7048/7133/7189/7292/7293/7412/7784/8379/8440/8654/8740/9093/9479/10385/10859/11035/11119/11146/11151/11326/23308/27242/29108/51043/54440/58515/64926/79679/81704/84433/339390/654346/100133941	75
LGG	GO:0002573	myeloid leukocyte differentiation	75/4620	123/10549	8.63508e-05	0.0275555	0.026616	142/537/634/677/714/814/920/1021/1050/1051/1053/1230/1385/1436/1499/1880/1945/2124/2150/2475/2623/2625/3059/3428/3516/3635/3665/3815/3930/4055/4067/4318/4627/4763/4831/4853/4920/5048/5293/5295/5468/5578/5925/6670/6688/6714/7037/7040/7048/7071/7098/7189/7305/7422/9935/10202/10221/10272/10312/10401/10766/10859/11006/11025/22904/23411/27102/54209/56975/79705/84959/116071/126014/135228/139716	75
LGG	GO:0002283	neutrophil activation involved in immune response	150/4620	273/10549	0.00011512	0.0292535	0.0282562	1/30/178/230/240/290/391/634/684/718/719/728/945/963/968/1116/1460/1471/1476/1508/1509/1535/1536/1675/1729/1774/1778/1794/1828/1915/2268/2357/2495/2512/2517/2548/2588/2665/2683/2821/2896/2990/3071/3101/3136/3240/3303/3326/3579/3614/3683/3684/3687/3689/3728/3837/3903/4125/4311/4318/4718/4831/4893/5175/5199/5223/5236/5337/5580/5695/5708/5717/5724/5777/5788/5834/5869/5879/5912/6036/6037/6280/6402/65…	150
LGG	GO:0042119	neutrophil activation	152/4620	279/10549	0.000179598	0.0413232	0.0399144	1/30/178/230/240/290/391/634/684/718/719/728/945/963/968/1116/1460/1471/1476/1508/1509/1535/1536/1675/1729/1774/1778/1794/1828/1915/2150/2268/2357/2495/2512/2517/2548/2588/2665/2683/2821/2896/2990/3071/3101/3136/3240/3303/3326/3579/3606/3614/3683/3684/3687/3689/3728/3837/3903/4125/4311/4318/4718/4831/4893/5175/5199/5223/5236/5337/5580/5695/5708/5717/5724/5777/5788/5834/5869/5879/5912/6036/6037/62…	152
LGG	GO:0071346	cellular response to interferon-gamma	64/4620	104/10549	0.00019142	0.0422081	0.0407691	199/818/1613/2209/2597/2634/2635/3055/3105/3106/3107/3118/3120/3127/3133/3134/3135/3136/3263/3326/3383/3459/3594/3661/3663/3665/3965/4360/4502/4684/4938/4939/4940/5371/5468/5580/5724/6364/6375/6770/6772/6813/6997/7098/7376/7412/7454/7474/7726/7791/8638/10097/10346/11093/11140/53840/55614/84166/115361/163351/252983/339122/388372/414062	64
LIHC	GO:0008380	RNA splicing	150/2129	295/11229	7.05157e-36	1.81966e-32	1.71984e-32	1477/1478/1479/1653/1659/1660/1665/1994/2962/3178/3181/3184/3185/3189/3190/3191/3312/4236/4670/4686/4809/4841/4904/5094/5431/5511/5518/5936/6100/6207/6421/6428/6432/6626/6629/6632/6633/6634/6637/6651/6830/7072/8175/8220/8227/8233/8458/8559/8563/8899/9092/9128/9295/9406/9410/9541/9589/9775/9785/9939/10073/10147/10181/10189/10236/10285/10421/10450/10492/10569/10625/10657/10713/10772/10907/10921/109…	150
LIHC	GO:0006397	mRNA processing	165/2129	346/11229	6.02894e-35	1.03718e-31	9.80285e-32	1022/1477/1478/1479/1653/1659/1660/1665/1994/2071/2926/2962/2965/3178/3181/3184/3185/3189/3190/3191/3312/4236/4670/4686/4809/4841/4904/5094/5431/5511/5930/5936/6294/6421/6428/6432/6626/6629/6632/6633/6634/6637/6651/6829/6830/7072/8175/8220/8227/8233/8458/8559/8563/8732/8899/9092/9128/9238/9295/9406/9410/9541/9589/9775/9785/9939/10073/10147/10181/10189/10236/10285/10421/10450/10492/10569/10657/107…	165
LIHC	GO:0034470	ncRNA processing	136/2129	286/11229	9.3477e-29	1.20609e-25	1.13993e-25	705/1478/1653/1662/1736/2091/2926/3181/3735/4088/4234/4809/5393/5394/5822/6125/6130/6155/6165/6194/6201/6202/6208/6217/6741/6839/6895/8270/8575/8886/9045/9092/9097/9221/9277/9326/9775/9790/9875/10200/10360/10412/10528/10557/10813/10969/11056/22803/22929/22984/23016/23076/23160/23378/23404/23481/23560/24140/25983/26156/26173/26610/27161/27304/28987/29102/29894/29960/51018/51118/51154/51504/51575/5…	136
LIHC	GO:0042254	ribosome biogenesis	118/2129	231/11229	1.26322e-28	1.3039e-25	1.23237e-25	14/705/1662/1736/2091/3692/3921/4809/4869/5393/5394/5822/6059/6125/6128/6130/6147/6152/6155/6165/6169/6175/6193/6194/6201/6202/6208/6217/6838/6839/8450/8886/9045/9092/9221/9277/9326/9775/9790/9816/9875/10153/10200/10360/10412/10528/10557/10813/10969/11056/22803/22984/23016/23076/23160/23378/23404/23481/23560/25983/26155/26156/26284/28987/29102/29889/29960/51018/51081/51118/51121/51154/51187/51388…	118
LIHC	GO:0034660	ncRNA metabolic process	151/2129	340/11229	8.56618e-28	6.35656e-25	6.00787e-25	705/1478/1615/1653/1662/1736/2058/2091/2617/2926/3181/3735/4088/4234/4603/4677/4809/5393/5394/5822/5859/6125/6130/6155/6165/6194/6201/6202/6208/6217/6741/6839/6895/8270/8565/8575/8886/9045/9092/9097/9221/9277/9326/9521/9775/9790/9875/10200/10360/10412/10528/10557/10813/10969/11056/22803/22929/22984/23016/23076/23160/23378/23404/23481/23560/24140/25973/25983/26156/26173/26610/27161/27304/28987/291…	151
LIHC	GO:0000377	RNA splicing, via transesterification reactions with bulged adenosine as nucleophile	116/2129	229/11229	9.85322e-28	6.35656e-25	6.00787e-25	1477/1478/1479/1653/1659/1660/1665/1994/2962/3178/3181/3184/3185/3189/3190/3191/3312/4236/4670/4686/4809/4904/5094/5431/5936/6421/6428/6432/6626/6629/6632/6633/6634/6637/6651/7072/8175/8220/8233/8559/8899/9092/9128/9295/9410/9589/9775/9785/9939/10073/10181/10189/10236/10285/10421/10450/10492/10569/10657/10713/10772/10907/10921/10929/11017/11100/11168/11218/11325/22826/22938/23020/23028/23283/2345…	116
LIHC	GO:0000398	mRNA splicing, via spliceosome	116/2129	229/11229	9.85322e-28	6.35656e-25	6.00787e-25	1477/1478/1479/1653/1659/1660/1665/1994/2962/3178/3181/3184/3185/3189/3190/3191/3312/4236/4670/4686/4809/4904/5094/5431/5936/6421/6428/6432/6626/6629/6632/6633/6634/6637/6651/7072/8175/8220/8233/8559/8899/9092/9128/9295/9410/9589/9775/9785/9939/10073/10181/10189/10236/10285/10421/10450/10492/10569/10657/10713/10772/10907/10921/10929/11017/11100/11168/11218/11325/22826/22938/23020/23028/23283/2345…	116
LIHC	GO:0000375	RNA splicing, via transesterification reactions	116/2129	231/11229	2.67845e-27	1.53594e-24	1.45169e-24	1477/1478/1479/1653/1659/1660/1665/1994/2962/3178/3181/3184/3185/3189/3190/3191/3312/4236/4670/4686/4809/4904/5094/5431/5936/6421/6428/6432/6626/6629/6632/6633/6634/6637/6651/7072/8175/8220/8233/8559/8899/9092/9128/9295/9410/9589/9775/9785/9939/10073/10181/10189/10236/10285/10421/10450/10492/10569/10657/10713/10772/10907/10921/10929/11017/11100/11168/11218/11325/22826/22938/23020/23028/23283/2345…	116
LIHC	GO:0016072	rRNA metabolic process	88/2129	175/11229	4.94381e-21	2.5515e-18	2.41154e-18	705/1662/1736/2091/4809/5393/5394/5822/6125/6130/6155/6165/6194/6201/6202/6208/6217/6839/8886/9045/9092/9221/9277/9326/9775/9790/9875/10200/10360/10412/10528/10557/10813/10969/11056/22803/22984/23016/23076/23160/23378/23404/23481/23560/25983/26156/28987/29102/29960/51018/51118/51154/51504/51575/51602/54433/54663/54680/54881/55035/55164/55505/55661/55695/55781/57050/57602/64965/65095/79033/79922/7…	88
LIHC	GO:0006364	rRNA processing	85/2129	167/11229	8.44005e-21	3.95992e-18	3.7427e-18	705/1662/1736/2091/4809/5393/5394/5822/6125/6130/6155/6165/6194/6201/6202/6208/6217/6839/8886/9045/9092/9221/9277/9326/9775/9790/9875/10200/10360/10412/10528/10557/10813/10969/11056/22803/22984/23016/23076/23160/23378/23404/23481/23560/25983/26156/28987/29960/51018/51118/51154/51504/51575/51602/54433/54663/54680/54881/55035/55164/55505/55661/55695/55781/57050/57602/64965/65095/79033/79922/79954/8…	85
LIHC	GO:0006405	RNA export from nucleus	51/2129	81/11229	3.04221e-18	1.20776e-15	1.14151e-15	1660/1977/2733/3178/3181/3692/4686/4869/6059/6396/6428/6432/6741/6830/8480/8563/8888/9295/9775/9785/9939/10189/10569/10657/10921/23279/26019/29072/29107/29890/29894/51692/51808/53371/54439/55153/55308/55706/55781/55795/57187/64062/65109/79228/79902/81608/81929/84324/84946/91746/129401	51
LIHC	GO:0022618	ribonucleoprotein complex assembly	66/2129	127/11229	4.85936e-17	1.79137e-14	1.6931e-14	1653/1660/3692/3921/4686/4809/5822/6125/6128/6147/6152/6169/6175/6193/6208/6632/6633/6634/6637/6895/8175/8233/8559/8607/8664/8665/8667/8668/9092/9326/10073/10181/10421/10480/10569/10713/10772/10907/11168/11218/23020/23451/25980/26284/27161/27316/27339/51081/51154/51187/51340/51747/54475/54680/54960/55164/55299/55692/56342/57461/58155/79577/79833/91746/192669/100130932	66
LIHC	GO:0071826	ribonucleoprotein complex subunit organization	68/2129	134/11229	8.23719e-17	2.83414e-14	2.67868e-14	1653/1659/1660/3692/3799/3921/4686/4809/5822/6125/6128/6147/6152/6169/6175/6193/6208/6632/6633/6634/6637/6895/8175/8233/8559/8607/8664/8665/8667/8668/9092/9326/10073/10181/10421/10480/10569/10713/10772/10907/11168/11218/23020/23451/25980/26284/27161/27316/27339/51081/51154/51187/51340/51747/54475/54680/54960/55164/55299/55692/56342/57461/58155/79577/79833/91746/192669/100130932	68
LIHC	GO:0050657	nucleic acid transport	60/2129	117/11229	2.90282e-15	8.81262e-13	8.3292e-13	1660/1977/2733/3178/3181/3692/4686/4869/5813/6059/6396/6421/6428/6432/6741/6830/8480/8563/8888/9295/9775/9785/9939/10073/10128/10189/10204/10569/10657/10921/23279/23299/26019/29072/29107/29890/29894/51637/51692/51808/53371/54439/55153/55308/55706/55781/55795/57187/64062/65109/79228/79902/81608/81929/84324/84946/87178/91746/129401/144983	60
LIHC	GO:0006412	translation	157/2129	471/11229	2.53983e-14	5.95822e-12	5.63138e-12	387/1615/1653/1660/1915/1933/1964/1965/1977/1978/1994/2058/2617/2686/2733/2935/3184/3396/3673/3692/3735/3921/4677/4686/4691/4848/4869/5594/5610/5813/5859/5936/6059/6125/6128/6130/6138/6141/6143/6146/6147/6152/6155/6157/6159/6161/6165/6167/6169/6175/6189/6193/6194/6198/6201/6202/6206/6207/6208/6217/6228/6233/6895/7072/8087/8565/8569/8664/8665/8667/8668/8761/8872/8890/8891/9045/9147/9221/9337/9349/…	157
LIHC	GO:0051168	nuclear export	61/2129	125/11229	3.26487e-14	7.32609e-12	6.92422e-12	1020/1660/1977/2733/2810/3178/3181/3692/4686/4869/5905/6059/6396/6428/6432/6741/6830/7295/8480/8498/8563/8888/9147/9295/9775/9785/9939/10189/10204/10541/10569/10657/10921/23279/26019/29072/29107/29890/29894/51692/51808/53371/54439/55153/55308/55696/55706/55781/55795/57187/64062/65109/79228/79902/81608/81929/84324/84946/91746/92335/129401	61
LIHC	GO:0006401	RNA catabolic process	109/2129	291/11229	5.83994e-14	1.25583e-11	1.18694e-11	328/1660/1736/1763/1994/2935/3184/3304/3312/3842/3921/4670/4686/4848/4850/4869/4904/5393/5394/5511/5518/5578/5688/5690/5705/5707/5713/5715/6125/6128/6130/6138/6141/6143/6146/6147/6152/6155/6157/6159/6161/6165/6167/6169/6175/6189/6193/6194/6201/6202/6206/6207/6208/6217/6228/6233/6418/6556/6741/7314/7529/7534/8087/8559/8761/9045/9238/9337/9349/9775/9939/10128/10213/10236/10492/10605/10767/10921/228…	109
LIHC	GO:0006913	nucleocytoplasmic transport	89/2129	221/11229	1.01974e-13	2.10515e-11	1.98967e-11	1020/1660/1977/2733/2810/3178/3181/3692/3841/3842/3843/4088/4686/4869/5469/5594/5905/5936/6059/6396/6428/6432/6632/6633/6634/6637/6741/6830/7295/8480/8498/8563/8888/9147/9221/9295/9349/9775/9785/9939/10073/10189/10204/10527/10541/10569/10636/10657/10921/11218/23279/23435/23520/23633/26019/29072/29107/29890/29894/30000/51194/51692/51715/51808/53371/54439/54960/55153/55308/55696/55706/55781/55795/5…	89
LIHC	GO:0006402	mRNA catabolic process	102/2129	271/11229	2.68918e-13	5.33802e-11	5.0452e-11	328/1660/1994/2935/3184/3304/3312/3842/3921/4670/4686/4848/4850/4869/4904/5393/5394/5518/5578/5688/5690/5705/5707/5713/5715/6125/6128/6130/6138/6141/6143/6146/6147/6152/6155/6157/6159/6161/6165/6167/6169/6175/6189/6193/6194/6201/6202/6206/6207/6208/6217/6228/6233/6418/6556/6741/7314/7529/7534/8087/8559/8761/9045/9238/9337/9349/9775/9939/10213/10236/10492/10605/10767/10921/23016/23019/23369/23404/…	102
LIHC	GO:0043043	peptide biosynthetic process	159/2129	493/11229	4.01067e-13	7.66633e-11	7.24579e-11	387/1615/1653/1660/1915/1933/1964/1965/1977/1978/1994/2058/2617/2686/2730/2733/2935/3184/3396/3673/3692/3735/3921/4677/4686/4691/4848/4869/5594/5610/5813/5859/5936/6059/6125/6128/6130/6138/6141/6143/6146/6147/6152/6155/6157/6159/6161/6165/6167/6169/6175/6189/6193/6194/6198/6201/6202/6206/6207/6208/6217/6228/6233/6895/7072/8087/8565/8569/8664/8665/8667/8668/8761/8872/8890/8891/9045/9147/9221/9337/…	159
LIHC	GO:0006406	mRNA export from nucleus	38/2129	64/11229	8.97628e-13	1.59747e-10	1.50984e-10	1977/2733/3181/4686/6396/6428/6432/6830/8480/8563/8888/9295/9775/9785/9939/10189/10569/10921/23279/26019/29072/29107/29890/29894/51692/53371/55308/55706/55795/57187/65109/79228/79902/81608/81929/84324/91746/129401	38
LIHC	GO:0071427	mRNA-containing ribonucleoprotein complex export from nucleus	38/2129	64/11229	8.97628e-13	1.59747e-10	1.50984e-10	1977/2733/3181/4686/6396/6428/6432/6830/8480/8563/8888/9295/9775/9785/9939/10189/10569/10921/23279/26019/29072/29107/29890/29894/51692/53371/55308/55706/55795/57187/65109/79228/79902/81608/81929/84324/91746/129401	38
LIHC	GO:0015931	nucleobase-containing compound transport	65/2129	148/11229	2.25493e-12	3.87923e-10	3.66643e-10	293/1660/1977/2733/3178/3181/3692/4686/4869/5813/6059/6396/6421/6428/6432/6741/6830/8480/8563/8888/9295/9775/9785/9939/10073/10128/10189/10204/10478/10569/10657/10921/23279/23299/26019/29072/29107/29890/29894/51006/51637/51692/51808/53371/54439/55153/55308/55315/55706/55781/55795/57187/64062/65109/79228/79902/81608/81929/84324/84946/87178/91746/129401/144983/339665	65
LIHC	GO:0042273	ribosomal large subunit biogenesis	36/2129	61/11229	4.6115e-12	7.6774e-10	7.25626e-10	14/3692/4809/4869/6125/6128/6130/6147/6152/6165/6169/6175/6838/8886/9045/9326/9875/10969/23481/23560/26155/26156/51121/51154/51187/51388/51491/54475/54663/54680/55003/55153/55299/56342/90441/285855	36
LIHC	GO:0006611	protein export from nucleus	54/2129	115/11229	6.75299e-12	1.08913e-09	1.02939e-09	1020/1977/2733/2810/3181/3692/4686/4869/5905/6059/6396/6428/6432/6741/6830/7295/8480/8498/8563/8888/9295/9775/9785/9939/10189/10204/10541/10569/10921/23279/26019/29072/29107/29890/29894/51692/53371/55153/55308/55696/55706/55781/55795/57187/65109/79228/79902/81608/81929/84324/84946/91746/92335/129401	54
LIHC	GO:1903311	regulation of mRNA metabolic process	84/2129	221/11229	1.94086e-11	3.03539e-09	2.86888e-09	328/1660/1994/3178/3181/3184/3190/3191/3312/3842/4670/4686/4869/4904/5393/5578/5688/5690/5705/5707/5713/5715/5936/6233/6294/6418/6428/6432/6556/6626/6651/6829/6830/7072/7314/7529/7534/8087/8761/9238/9337/9589/9939/10181/10213/10236/10492/10605/10657/10772/10921/10929/22938/23016/23019/23369/23404/23435/25962/26058/26135/27161/27316/27339/29890/29896/51441/51594/54623/55234/55795/55802/56254/56829…	84
LIHC	GO:0031123	RNA 3'-end processing	48/2129	101/11229	5.8519e-11	8.88284e-09	8.39558e-09	1477/1478/1479/1736/2091/2926/4686/5393/5394/6428/6432/6626/6741/6829/8563/9295/9775/9785/9939/10189/10569/10921/22828/23016/23283/23404/25962/26173/29101/29894/51692/51728/54623/54931/55149/56254/57117/57187/57508/65109/79033/79228/79577/79650/81608/84324/87178/118460	48
LIHC	GO:0051028	mRNA transport	44/2129	89/11229	7.14089e-11	1.05298e-08	9.95215e-09	1660/1977/2733/3178/3181/4686/6396/6428/6432/6830/8480/8563/8888/9295/9775/9785/9939/10128/10189/10204/10569/10921/23279/23299/26019/29072/29107/29890/29894/51692/53371/55308/55706/55795/57187/65109/79228/79902/81608/81929/84324/91746/129401/144983	44
LIHC	GO:0006399	tRNA metabolic process	56/2129	134/11229	7.54486e-10	9.73475e-08	9.20076e-08	1478/1615/1653/2058/2617/2926/3735/4234/4677/5393/5394/5859/6741/8270/8565/9097/9521/10557/22929/23016/23404/24140/25973/26610/27304/29894/51504/51637/51654/51728/54517/54522/54802/54931/54974/55039/57570/64172/79042/79587/79828/80745/80746/80755/84267/84705/84881/112487/112858/112970/115708/126789/127253/134637/339487/348180	56
LIHC	GO:0042274	ribosomal small subunit biogenesis	29/2129	50/11229	9.94967e-10	1.25244e-07	1.18374e-07	705/3921/4869/5822/6169/6193/6194/6201/6202/6208/6217/6838/9277/9790/11056/25983/26284/28987/51081/55781/57050/64965/65095/79954/83732/84294/84916/84946/153443	29
LIHC	GO:0006260	DNA replication	63/2129	160/11229	1.23623e-09	1.48377e-07	1.40238e-07	466/898/1660/1763/4361/4673/4678/4999/5000/5111/5518/5813/5879/5884/5930/5932/5982/6118/6240/6418/6742/6749/7270/8243/9400/10036/10189/10269/10533/10714/10926/11124/11143/11177/22944/23054/23063/23244/23560/23595/26057/26271/27000/27343/50485/51507/51659/51750/54107/54962/55159/55704/56652/57695/64785/83743/84289/84893/91603/92667/157777/201254/253714	63
LIHC	GO:0006281	DNA repair	112/2129	350/11229	2.2445e-09	2.6327e-07	2.48828e-07	25/328/571/1022/1032/1454/1653/1660/1763/2071/2175/2176/2547/2873/2965/3148/4255/4361/4841/4862/4869/5111/5431/5531/5884/5885/5889/5892/5932/5982/6118/6233/6421/6749/7314/7341/7398/7515/7520/7913/8243/8450/8505/8607/9025/9100/9320/9400/9960/9978/10036/10213/10269/10450/10459/10714/10920/10980/22944/23028/23054/23137/23244/23503/25836/25842/27339/27343/29072/50485/51138/51548/51659/51720/51750/548…	112
LIHC	GO:0006353	DNA-templated transcription, termination	29/2129	52/11229	3.50236e-09	3.92949e-07	3.71394e-07	1022/1477/1478/1479/1660/2071/2965/4686/6634/6637/7270/7343/8458/9533/10269/10849/22803/22828/23283/25885/29101/29894/51692/51728/79101/81608/84172/84967/221830	29
LIHC	GO:0000956	nuclear-transcribed mRNA catabolic process	63/2129	165/11229	5.20338e-09	5.59471e-07	5.28782e-07	2935/3921/4686/4848/4850/5393/5394/5518/6125/6128/6130/6138/6141/6143/6146/6147/6152/6155/6157/6159/6161/6165/6167/6169/6175/6189/6193/6194/6201/6202/6206/6207/6208/6217/6228/6233/6741/8559/9045/9337/9349/9775/9939/10767/10921/23016/23019/23404/23644/23658/26019/27161/51154/51594/55149/55181/55795/55802/56006/57819/65109/115024/118460	63
LIHC	GO:0000245	spliceosomal complex assembly	24/2129	39/11229	5.36995e-09	5.65598e-07	5.34572e-07	1653/4686/6632/6633/6637/8175/8233/10181/10569/10713/10772/10907/11168/23020/23451/27316/27339/51340/51747/55692/57461/58155/79833/91746	24
LIHC	GO:0000184	nuclear-transcribed mRNA catabolic process, nonsense-mediated decay	44/2129	102/11229	1.56047e-08	1.51954e-06	1.43619e-06	2935/3921/4686/5394/5518/6125/6128/6130/6138/6141/6143/6146/6147/6152/6155/6157/6159/6161/6165/6167/6169/6175/6189/6193/6194/6201/6202/6206/6207/6208/6217/6228/6233/9045/9349/9775/9939/10921/26019/51594/55181/55802/56006/65109	44
LIHC	GO:0010608	posttranscriptional regulation of gene expression	127/2129	426/11229	2.43056e-08	2.28075e-06	2.15564e-06	328/387/1653/1660/1736/1965/1977/1978/1994/2058/2733/3181/3184/3312/3673/3692/3842/4088/4670/4686/4691/4848/4869/4904/5393/5431/5511/5578/5594/5610/5688/5690/5705/5707/5713/5715/5813/5936/6125/6146/6169/6198/6208/6233/6396/6418/6556/6895/7072/7247/7314/7529/7534/8087/8480/8569/8575/8664/8667/8761/8872/8890/9147/9221/9238/9337/9470/9669/9775/9782/9939/10128/10209/10213/10236/10269/10399/10492/1060…	127
LIHC	GO:0031124	mRNA 3'-end processing	33/2129	68/11229	3.03358e-08	2.69937e-06	2.55129e-06	1477/1478/1479/2926/4686/6428/6432/6626/6829/8563/9295/9775/9785/9939/10189/10569/10921/22828/23283/25962/29101/29894/51692/54623/55149/56254/57187/65109/79228/79577/81608/84324/87178	33
LIHC	GO:0008033	tRNA processing	41/2129	95/11229	4.71674e-08	4.12595e-06	3.89962e-06	1478/1653/2926/3735/4234/6741/8270/9097/10557/22929/24140/26610/27304/29894/51504/51637/51654/51728/54517/54522/54802/54931/54974/55039/57570/64172/79042/79828/80745/80746/84267/84705/84881/112858/112970/115708/126789/127253/134637/339487/348180	41
LIHC	GO:0071103	DNA conformation change	71/2129	205/11229	6.4277e-08	5.52889e-06	5.22561e-06	25/1029/1105/1616/1653/1660/1763/2071/2547/2965/3009/3065/3148/3181/4152/4361/4673/4678/4869/5813/5982/6233/6418/6839/7155/7314/7520/8340/8450/8520/8607/8815/9025/9400/9869/9978/10036/10146/10541/10592/10664/22880/23063/23378/23421/25836/25842/25913/26155/50485/50809/51548/51659/51750/54107/54623/54892/55320/55839/56652/56916/79682/79711/79829/79913/83743/84893/93973/113510/201254/653604	71
LIHC	GO:0006310	DNA recombination	61/2129	172/11229	2.0844e-07	1.76354e-05	1.6668e-05	328/2547/3009/3148/3329/4361/4841/5531/5885/5889/5892/5932/6118/6421/6830/6929/7155/7247/7515/7520/8607/9025/9400/9730/10189/10213/10459/22944/23028/23054/23137/23503/25836/27343/29072/30009/51548/51659/51750/54891/55086/55159/56893/56916/64210/64421/79000/79703/79728/79913/84057/84893/93973/113510/118460/125476/157777/201254/253714/283899/493861	61
LIHC	GO:0071824	protein-DNA complex subunit organization	59/2129	166/11229	3.01721e-07	2.4331e-05	2.29963e-05	1022/1385/1616/1810/2071/2965/3009/3148/4673/4678/4869/5705/5757/6118/6233/6418/6597/6605/6666/6830/6878/6883/7314/7343/8340/8450/8520/8554/8607/8888/9025/9328/9330/9349/9519/9978/10001/10036/10541/10664/23421/23595/25842/29072/50809/54107/54623/55320/55814/55839/55929/79682/79711/81611/83743/157777/196528/201254/653604	59
LIHC	GO:0043484	regulation of RNA splicing	38/2129	93/11229	7.85593e-07	6.23761e-05	5.89545e-05	3178/3181/3185/3190/3191/4686/5936/6207/6428/6432/6651/7072/8227/9589/9939/10181/10657/10772/10921/10929/22927/22938/23076/27316/27339/29890/29896/51755/55234/55696/57703/57716/58155/58517/64783/84991/91746/92906	38
LIHC	GO:0000387	spliceosomal snRNP assembly	14/2129	20/11229	9.11505e-07	7.12769e-05	6.7367e-05	6632/6633/6634/6637/9092/10073/10421/10772/11218/25980/27339/54960/79833/100130932	14
LIHC	GO:0040029	regulation of gene expression, epigenetic	68/2129	206/11229	9.2662e-07	7.13774e-05	6.7462e-05	648/1660/1994/2145/3009/3181/3692/3720/4088/5394/5431/5511/5936/5987/6396/6895/7247/7913/8087/8480/8520/8575/8726/9337/9425/9533/9759/10014/10209/10269/10365/10664/10849/10943/11146/22823/22880/23019/23279/23369/23451/23512/25842/25885/26058/26147/27161/29102/29890/51548/53371/55706/55791/64783/79101/79902/81929/83637/84172/84444/84759/84981/91746/129401/192669/221830/653604/100048912	68
LIHC	GO:0006338	chromatin remodeling	49/2129	135/11229	1.48663e-06	0.000111196	0.000105096	1029/1105/1616/1810/2145/2186/3065/3066/3148/3720/4152/4678/4869/5058/5757/6597/6605/6830/6839/8242/8607/9025/9219/9759/9869/10014/10360/11164/11177/11335/22880/23378/23421/51548/54107/55320/55839/55929/56916/79682/79723/79829/79913/81611/93973/125476/201254/283899/653604	49
LIHC	GO:0006417	regulation of translation	77/2129	247/11229	2.2618e-06	0.000166759	0.000157612	387/1653/1660/1965/1977/1978/1994/2058/2733/3184/3673/3692/4686/4691/4848/4869/5594/5610/5813/5936/6125/6146/6169/6198/6208/6895/7072/8087/8569/8664/8667/8872/8890/9147/9221/9337/9470/9669/9775/9939/10128/10209/10236/10399/10492/10605/10657/22927/23019/23107/23173/23185/23369/25983/26058/27161/51123/51441/51611/51654/54517/54915/54931/54952/55005/55239/57409/64215/65109/79072/84324/84881/120526/1…	77
LIHC	GO:0006302	double-strand break repair	53/2129	152/11229	2.32276e-06	0.000168712	0.000159457	1653/1763/2547/4255/4361/5531/5885/5889/5892/5932/6118/6421/7341/7515/7520/7913/9025/9320/9400/10213/10459/23028/23137/23503/25836/27339/27343/29072/51548/51659/51720/51750/54840/55086/55100/55159/56893/56916/64210/64421/64858/79000/79728/79840/79913/84142/84250/84893/91419/93973/113510/157777/253714	53
LIHC	GO:0050684	regulation of mRNA processing	37/2129	93/11229	2.35366e-06	0.000168712	0.000159457	1660/3178/3181/3190/3191/4686/5936/6294/6428/6432/6626/6651/6829/6830/7072/9589/9939/10181/10657/10772/10921/10929/22938/25962/27316/27339/29890/29896/54623/55234/56254/57703/58517/64783/79577/84991/91746	37
LIHC	GO:0030490	maturation of SSU-rRNA	19/2129	35/11229	3.13265e-06	0.000221474	0.000209325	705/5822/6202/6208/6217/9277/9790/11056/25983/28987/55781/57050/64965/65095/79954/83732/84294/84916/153443	19
LIHC	GO:0006261	DNA-dependent DNA replication	35/2129	87/11229	3.24525e-06	0.000225707	0.000213326	898/1763/4361/4999/5000/5111/5813/5982/6118/6742/8243/9400/10189/10269/10533/10714/10926/11177/23595/26271/50485/51507/51659/51750/54107/54962/55159/56652/64785/84893/91603/92667/157777/201254/253714	35
LIHC	GO:0016569	covalent chromatin modification	94/2129	320/11229	3.27999e-06	0.000225707	0.000213326	648/1020/1105/1810/2091/2145/3009/3065/3066/3276/3622/3720/4152/4297/4302/4591/5245/5578/5977/6018/6418/6421/6830/6839/6883/6885/7324/7422/7443/7862/8089/8242/8450/8464/8520/8607/8726/8819/8888/9025/9219/9320/9730/9759/9869/9913/9960/10014/10269/10626/10664/10943/11143/11177/22823/22880/22938/23028/23512/25836/25855/26147/26155/29072/51230/51322/51548/51720/54107/54623/54880/54934/55100/55352/558…	94
LIHC	GO:0048024	regulation of mRNA splicing, via spliceosome	28/2129	64/11229	4.52165e-06	0.000303068	0.000286443	3178/3181/3190/3191/4686/5936/6428/6432/6651/7072/9589/9939/10181/10657/10772/10921/10929/22938/27316/27339/29890/29896/55234/57703/58517/64783/84991/91746	28
LIHC	GO:0000723	telomere maintenance	38/2129	99/11229	4.79243e-06	0.000317099	0.000299705	328/898/1736/1763/2547/3178/3181/3184/4216/4361/5111/5394/5570/5588/5594/5889/5892/5982/6118/6950/7515/7520/10574/10575/10714/22948/23137/25913/50485/51548/51750/54107/54433/54552/55505/64421/64858/65057	38
LIHC	GO:0061013	regulation of mRNA catabolic process	48/2129	138/11229	7.40865e-06	0.000468432	0.000442736	328/1660/1994/3184/3312/3842/4670/4869/4904/5393/5578/5688/5690/5705/5707/5713/5715/6233/6418/6556/7314/7529/7534/8087/8761/9238/9337/10213/10236/10492/10605/23016/23019/23369/23404/23435/26058/26135/27161/51441/51594/55795/55802/56829/79072/87178/118460/399664	48
LIHC	GO:0016570	histone modification	91/2129	313/11229	7.44263e-06	0.000468432	0.000442736	648/1020/1810/2091/2145/3009/3065/3066/3276/3622/3720/4297/4302/4591/5245/5578/5977/6018/6418/6421/6830/6839/6883/6885/7324/7422/7443/7862/8089/8242/8450/8464/8520/8607/8726/8819/8888/9025/9219/9320/9730/9759/9869/9913/9960/10014/10269/10626/10664/10943/11143/11177/22823/22938/23028/23512/25836/25855/26147/26155/29072/51230/51322/51548/51720/54107/54623/54880/54934/55100/55352/55818/55929/56254/5…	91
LIHC	GO:0002181	cytoplasmic translation	30/2129	73/11229	9.72325e-06	0.000604599	0.000571433	1660/1978/2935/3921/5936/6128/6138/6141/6143/6152/6159/6161/6165/6169/6175/6228/8664/8665/8667/8668/10480/24140/51121/51182/51372/51389/51441/51611/55854/120526	30
LIHC	GO:0033044	regulation of chromosome organization	68/2129	219/11229	1.01022e-05	0.000620686	0.000586638	1736/3009/3178/3181/3184/3622/3720/4085/4216/4297/4302/4361/5394/5570/5588/5594/5885/6418/6421/6830/6950/7422/7515/7520/8678/8726/9183/9184/9320/9869/10269/10459/10574/10575/10664/11011/11143/22823/22880/22938/22948/23028/23063/23137/25836/25842/25913/26147/26155/26255/26271/51451/51548/51750/54552/54623/54880/55100/55755/55781/55795/55818/56254/64682/65057/79829/84250/93649	68
LIHC	GO:2000232	regulation of rRNA processing	9/2129	11/11229	1.18356e-05	0.000710834	0.000671842	23160/51504/55164/55781/57602/83732/84128/84135/114049	9
LIHC	GO:0009451	RNA modification	43/2129	121/11229	1.18449e-05	0.000710834	0.000671842	1736/2091/4234/6741/9589/22929/24140/25962/26610/27304/29890/29960/51504/51654/54433/54517/54522/54802/54931/54974/55039/55505/55695/57570/64172/64783/79828/79922/80745/84267/84705/84881/112970/113000/114049/115708/126789/127253/134637/196074/285367/348180/387338	43
LIHC	GO:1904358	positive regulation of telomere maintenance via telomere lengthening	15/2129	26/11229	1.29786e-05	0.000765119	0.000723149	1736/3178/3181/4216/5570/5588/5594/6950/7520/10574/10575/22948/25913/51750/65057	15
LIHC	GO:1901990	regulation of mitotic cell cycle phase transition	78/2129	262/11229	1.3046e-05	0.000765119	0.000723149	328/898/994/1029/1031/1032/1453/1454/1639/1778/2071/2810/3276/4085/4361/4848/4850/4957/5111/5116/5518/5688/5690/5705/5707/5713/5715/5884/5885/5889/6118/7023/7321/7324/7465/8450/8454/8481/8655/8883/9183/9184/9337/9662/9738/9978/10213/10217/10459/10540/10733/11170/23019/26057/26058/26271/28984/51451/54820/55125/55142/55159/55755/55781/55795/55920/57521/60561/64682/79577/81853/84131/84967/91603/9568…	78
LIHC	GO:0060271	cilium assembly	80/2129	271/11229	1.42792e-05	0.000828033	0.000782612	1453/1454/1639/1778/1951/3842/4134/4957/5116/5518/6674/6738/8195/8481/8655/9662/9738/10096/10540/10733/10801/11127/22832/22920/23322/25809/25886/26123/26146/26160/27148/49856/50807/51098/51256/51364/51626/51668/51715/54806/54820/54874/54903/54919/55036/55125/55142/55212/55704/55755/57539/57560/65062/65250/79598/79809/79867/79989/80173/80210/83547/83658/84131/84902/84984/85302/89891/90355/91147/95…	80
LIHC	GO:0032200	telomere organization	39/2129	107/11229	1.51834e-05	0.000870686	0.000822925	328/898/1736/1763/2547/3178/3181/3184/4216/4361/5111/5394/5570/5588/5594/5889/5892/5982/6118/6950/7515/7520/10574/10575/10714/22948/23137/25913/50485/51548/51750/54107/54433/54552/55505/64421/64858/65057/84444	39
LIHC	GO:0000380	alternative mRNA splicing, via spliceosome	23/2129	51/11229	1.73953e-05	0.00097584	0.000922311	1660/3178/3191/4670/5936/6421/6428/6432/9589/9939/10181/10569/10657/10772/10921/10929/23028/27316/29890/55234/58517/64783/84991	23
LIHC	GO:0032392	DNA geometric change	30/2129	75/11229	1.8346e-05	0.00100727	0.00095202	1105/1653/1660/1763/2071/2547/2965/3148/3181/4361/5813/5982/6233/7314/7520/8450/8607/9400/9978/10146/25913/50485/51659/51750/56652/56916/79913/84893/93973/113510	30
LIHC	GO:0006369	termination of RNA polymerase II transcription	14/2129	24/11229	2.1391e-05	0.00116209	0.00109835	1477/1478/1479/4686/6634/6637/8458/22828/23283/29101/29894/51692/81608/84967	14
LIHC	GO:0006613	cotranslational protein targeting to membrane	34/2129	90/11229	2.21314e-05	0.0011898	0.00112453	3921/6125/6128/6130/6138/6141/6143/6146/6147/6152/6155/6157/6159/6161/6165/6167/6169/6175/6189/6193/6194/6201/6202/6206/6207/6208/6217/6228/6233/6730/6731/6745/9045/9349	34
LIHC	GO:0000082	G1/S transition of mitotic cell cycle	51/2129	155/11229	2.27571e-05	0.00121082	0.0011444	328/571/898/1022/1029/1031/1032/1977/1978/2810/2935/3276/3688/4678/4848/4850/4863/4999/5000/5111/5471/5537/5932/6118/6194/6198/7465/8450/8453/8454/8554/9337/10217/10657/10926/11170/23019/23595/26057/26058/26271/28984/54107/55159/57521/57695/79577/81853/84967/143384/245711	51
LIHC	GO:0006614	SRP-dependent cotranslational protein targeting to membrane	33/2129	87/11229	2.6399e-05	0.00134896	0.00127497	3921/6125/6128/6130/6138/6141/6143/6146/6147/6152/6155/6157/6159/6161/6165/6167/6169/6175/6189/6193/6194/6201/6202/6206/6207/6208/6217/6228/6233/6730/6731/9045/9349	33
LIHC	GO:0006400	tRNA modification	26/2129	63/11229	3.44092e-05	0.00172413	0.00162956	4234/6741/22929/24140/26610/27304/51504/51654/54517/54522/54802/54931/54974/55039/57570/64172/79828/80745/84267/84705/112970/115708/126789/127253/134637/348180	26
LIHC	GO:0034728	nucleosome organization	35/2129	96/11229	4.05776e-05	0.00192247	0.00181701	1616/3009/3148/4673/4678/4869/5757/6418/6597/6605/6830/8340/8520/8607/8888/9025/10036/10541/10664/23421/25842/29072/50809/54107/54623/55320/55839/55929/79682/79711/81611/83743/196528/201254/653604	35
LIHC	GO:0000086	G2/M transition of mitotic cell cycle	51/2129	158/11229	4.05841e-05	0.00192247	0.00181701	571/994/1022/1453/1454/1639/1778/4361/4957/5116/5500/5518/5688/5690/5705/5707/5713/5715/5884/5885/5889/7465/8454/8481/8655/8883/9662/9738/9978/10213/10540/10657/10733/26271/51400/51451/54820/55125/55142/55755/55920/57325/60561/84131/84930/91603/95681/115106/121441/203068/219771	51
LIHC	GO:0006275	regulation of DNA replication	27/2129	67/11229	4.06024e-05	0.00192247	0.00181701	466/1660/1763/4361/5111/5518/5879/5884/5930/5982/7270/8243/10269/10533/10926/11124/23063/23244/23560/26057/26271/50485/54962/55704/57695/84893/91603	27
LIHC	GO:0034502	protein localization to chromosome	21/2129	47/11229	4.76051e-05	0.00217518	0.00205586	1736/3009/5885/6118/6950/7520/9183/9184/10574/10575/10664/22948/23063/23383/25836/25913/29072/54552/55920/65057/84250	21
LIHC	GO:0042255	ribosome assembly	21/2129	47/11229	4.76051e-05	0.00217518	0.00205586	3692/3921/4869/5822/6125/6128/6147/6152/6169/6175/6193/6208/26284/51081/51154/51187/51388/54475/55299/56342/387338	21
LIHC	GO:0043044	ATP-dependent chromatin remodeling	21/2129	47/11229	4.76051e-05	0.00217518	0.00205586	3065/3066/4678/4869/5757/6597/6605/8607/9025/9219/23421/54107/55320/55839/55929/56916/79682/79913/81611/93973/201254	21
LIHC	GO:0008213	protein alkylation	41/2129	120/11229	5.35957e-05	0.00238455	0.00225374	2091/2145/2935/3009/3276/3720/4297/4302/5110/6018/6634/6830/6839/8726/9869/10664/22823/22938/23028/23512/25895/25940/26147/29072/51451/51504/51603/54623/54880/55352/55471/55818/56254/79723/79823/79918/80204/84444/84661/134145/151194	41
LIHC	GO:0032508	DNA duplex unwinding	27/2129	68/11229	5.5303e-05	0.00243948	0.00230566	1105/1653/1660/1763/2071/2547/2965/4361/5813/5982/6233/7314/7520/8450/8607/9400/9978/10146/25913/51659/51750/56652/56916/79913/84893/93973/113510	27
LIHC	GO:1902749	regulation of cell cycle G2/M phase transition	44/2129	132/11229	5.71336e-05	0.00249887	0.0023618	994/1453/1454/1639/1778/4361/4869/4957/5116/5518/5688/5690/5705/5707/5713/5715/5884/5885/5889/8454/8481/8655/8883/9662/9738/9978/10213/10540/10733/26271/51720/54820/55125/55142/55755/55920/60561/84131/84142/91603/95681/115106/121441/203068	44
LIHC	GO:0006354	DNA-templated transcription, elongation	30/2129	79/11229	5.90059e-05	0.00255907	0.0024187	1022/2071/2962/2965/4686/5431/6749/6829/6830/6924/7343/8563/8812/9025/9400/9533/10189/10849/22828/25885/25920/26610/29072/51755/54623/55795/79101/79577/84172/221830	30
LIHC	GO:0044782	cilium organization	81/2129	286/11229	6.3878e-05	0.00274729	0.00259659	1453/1454/1639/1778/1951/3842/4134/4957/5116/5518/6674/6738/8195/8481/8655/9662/9738/10096/10540/10733/10801/11127/22832/22920/23322/25809/25886/26123/26146/26160/27148/49856/50807/51098/51256/51364/51626/51668/51715/54806/54820/54874/54903/54919/55036/55125/55142/55212/55704/55755/57539/57560/65062/65250/79598/79809/79867/79989/80173/80210/83547/83658/84131/84902/84984/85302/89891/90355/91147/95…	81
LIHC	GO:0010389	regulation of G2/M transition of mitotic cell cycle	41/2129	121/11229	6.64329e-05	0.00283018	0.00267493	994/1453/1454/1639/1778/4361/4957/5116/5518/5688/5690/5705/5707/5713/5715/5884/5885/5889/8454/8481/8655/8883/9662/9738/9978/10213/10540/10733/26271/54820/55125/55142/55755/55920/60561/84131/91603/95681/115106/121441/203068	41
LIHC	GO:0032212	positive regulation of telomere maintenance via telomerase	13/2129	23/11229	6.69021e-05	0.00283018	0.00267493	1736/3178/4216/5570/5588/5594/6950/7520/10574/10575/22948/25913/65057	13
LIHC	GO:0000724	double-strand break repair via homologous recombination	30/2129	80/11229	7.74929e-05	0.00322533	0.00304841	4361/5531/5889/5892/5932/6118/6421/7515/9400/10213/10459/23028/23137/23503/25836/27343/29072/51548/51659/51750/55086/55159/56893/64210/79000/79728/84893/113510/157777/253714	30
LIHC	GO:0000725	recombinational repair	30/2129	80/11229	7.74929e-05	0.00322533	0.00304841	4361/5531/5889/5892/5932/6118/6421/7515/9400/10213/10459/23028/23137/23503/25836/27343/29072/51548/51659/51750/55086/55159/56893/64210/79000/79728/84893/113510/157777/253714	30
LIHC	GO:0065004	protein-DNA complex assembly	47/2129	146/11229	8.61665e-05	0.00355764	0.00336249	1022/1385/1616/1810/2071/2965/3009/3148/4673/4678/4869/5705/6118/6233/6418/6597/6666/6878/6883/7314/7343/8340/8450/8520/8554/8607/9328/9330/9519/9978/10001/10036/10541/23421/23595/25842/50809/54107/55320/55814/55839/79682/79711/83743/157777/201254/653604	47
LIHC	GO:0018205	peptidyl-lysine modification	78/2129	276/11229	9.36574e-05	0.00383534	0.00362495	538/1810/2145/3009/3066/3720/4297/4302/5905/5977/6018/6418/6613/6804/6830/6839/6883/6885/7341/7862/8089/8464/8480/8520/8554/8607/8726/8888/9759/9869/9913/10055/10269/10401/10626/10664/10943/11143/11177/22823/22938/23028/23279/23512/25895/25950/26147/26155/26276/29072/29843/51230/51601/53371/54107/54552/54880/54934/55706/55818/55929/57325/57691/79723/79823/79829/79902/79918/81929/83637/84289/84444…	78
LIHC	GO:0097064	ncRNA export from nucleus	11/2129	18/11229	9.43787e-05	0.00383534	0.00362495	4869/6396/6741/8480/23279/51808/53371/55706/79902/81929/129401	11
LIHC	GO:0090670	RNA localization to Cajal body	9/2129	13/11229	0.000106204	0.00412589	0.00389957	1736/5394/6950/8607/10574/10575/22948/55164/55505	9
LIHC	GO:0090671	telomerase RNA localization to Cajal body	9/2129	13/11229	0.000106204	0.00412589	0.00389957	1736/5394/6950/8607/10574/10575/22948/55164/55505	9
LIHC	GO:0045047	protein targeting to ER	35/2129	100/11229	0.000106325	0.00412589	0.00389957	3921/6125/6128/6130/6138/6141/6143/6146/6147/6152/6155/6157/6159/6161/6165/6167/6169/6175/6189/6193/6194/6201/6202/6206/6207/6208/6217/6228/6233/6730/6731/9045/9349/54557/128866	35
LIHC	GO:0072599	establishment of protein localization to endoplasmic reticulum	36/2129	104/11229	0.000110502	0.00425596	0.0040225	3921/6125/6128/6130/6138/6141/6143/6146/6147/6152/6155/6157/6159/6161/6165/6167/6169/6175/6189/6193/6194/6201/6202/6206/6207/6208/6217/6228/6233/6730/6731/9045/9349/10890/54557/128866	36
LIHC	GO:2001252	positive regulation of chromosome organization	39/2129	117/11229	0.000147322	0.00563208	0.00532313	1736/3009/3178/3181/3184/3622/3720/4216/4297/4361/5570/5588/5594/5885/6421/6950/7422/7520/8678/8726/9869/10574/10575/11143/22823/22880/22938/22948/23028/23137/25836/25913/26147/51548/51750/54623/56254/65057/84250	39
LIHC	GO:0090305	nucleic acid phosphodiester bond hydrolysis	60/2129	203/11229	0.000156134	0.00588181	0.00555916	328/1478/1479/1653/1676/1763/2071/2965/3148/4361/4686/4848/5111/5393/5394/5511/5932/5982/6118/6233/7247/7314/8450/9337/9941/9978/10146/10557/10714/22803/23016/23019/23283/23404/23644/27161/28987/29102/29894/51692/51728/54840/55802/64421/64858/65095/79033/79042/79650/79703/80055/80746/81608/81875/84294/84893/87178/92667/118460/192669	60
LIHC	GO:0043628	ncRNA 3'-end processing	15/2129	31/11229	0.000193304	0.00712601	0.00673511	1736/2091/5393/5394/6741/23016/23404/26173/51728/54931/57117/57508/79033/79650/118460	15
LIHC	GO:0000462	maturation of SSU-rRNA from tricistronic rRNA transcript (SSU-rRNA, 5.8S rRNA, LSU-rRNA)	14/2129	28/11229	0.00020369	0.00745563	0.00704665	705/5822/6202/6208/6217/9277/9790/25983/57050/64965/65095/79954/84294/84916	14
LIHC	GO:0006333	chromatin assembly or disassembly	41/2129	127/11229	0.00022153	0.00805153	0.00760987	1029/1616/3009/3065/3148/4152/4673/4678/4869/6418/6597/6605/6839/8340/8520/8607/9219/9869/10036/10541/10664/11011/22880/23378/23421/25842/26155/50809/51548/54107/54623/55320/55839/79682/79711/79723/79829/83743/196528/201254/653604	41
LIHC	GO:0098781	ncRNA transcription	27/2129	73/11229	0.000226723	0.00818262	0.00773377	1022/2962/2975/2976/4686/4691/5431/5451/6597/6618/6667/6878/8812/9328/9330/10360/10849/23379/26173/51808/54973/57117/57508/79871/84172/84365/112495	27
LIHC	GO:0035735	intraciliary transport involved in cilium assembly	17/2129	38/11229	0.000243571	0.00866944	0.00819388	3842/8655/11127/22920/26146/26160/51098/51626/51668/57539/57560/79809/79989/80173/83658/89891/117178	17
LIHC	GO:0000470	maturation of LSU-rRNA	10/2129	17/11229	0.000309268	0.0106062	0.0100244	4809/6130/8886/9326/9875/23481/23560/26156/54680/285855	10
LIHC	GO:0006360	transcription by RNA polymerase I	18/2129	42/11229	0.000310755	0.0106062	0.0100244	1022/2071/2965/4691/5469/6597/7270/7343/9533/10269/10849/23160/25885/79101/84128/84135/84172/221830	18
LIHC	GO:0006282	regulation of DNA repair	28/2129	78/11229	0.000312371	0.0106062	0.0100244	1660/4255/4862/5111/5531/6118/7398/7515/7913/8505/9025/9320/9400/10459/23028/29072/51548/51720/51750/55086/55100/56893/57332/64210/79000/84142/84250/84893	28
LIHC	GO:0000280	nuclear division	63/2129	221/11229	0.000329014	0.0110983	0.0104895	387/898/994/1164/2175/3304/3622/3832/4085/4361/4603/5518/5885/5889/5892/5902/6152/6683/7155/7314/8243/8678/9183/9184/9820/10096/10459/10592/10734/23063/23122/23137/23244/23383/25836/26255/26271/28984/49856/51451/54820/55023/55125/55706/55755/55781/55795/55968/56647/64682/79598/79703/79980/81929/84057/84250/84930/113510/128866/145645/157777/201254/245711	63
LIHC	GO:0008156	negative regulation of DNA replication	13/2129	26/11229	0.000344057	0.0114807	0.0108509	4361/5884/7270/8243/10533/23063/23244/23560/26271/50485/54962/84893/91603	13
LIHC	GO:0070646	protein modification by small protein removal	58/2129	200/11229	0.0003448	0.0114807	0.0108509	387/2873/4088/4738/5688/5690/5705/5707/5713/5715/6233/6885/7314/7321/7398/8027/8464/8607/8665/8678/8724/8975/9097/9100/9738/9825/9929/9960/9986/10213/10713/10920/10980/23358/29843/51035/51138/51633/51720/54891/55288/57602/57646/57695/64750/79913/84142/84196/84669/85015/90268/93973/125476/159195/171023/220213/221937/283899	58
LIHC	GO:0006363	termination of RNA polymerase I transcription	12/2129	23/11229	0.000351609	0.0115583	0.0109243	1022/2071/2965/7270/7343/9533/10269/10849/25885/79101/84172/221830	12
LIHC	GO:0016073	snRNA metabolic process	12/2129	23/11229	0.000351609	0.0115583	0.0109243	1736/5393/5394/23016/23404/26173/54973/55505/57117/57508/79650/118460	12
LIHC	GO:2001251	negative regulation of chromosome organization	31/2129	90/11229	0.000356291	0.0115649	0.0109305	3009/3178/3720/4085/4302/5394/5885/6418/6830/7515/7520/9183/9184/9320/10459/22823/23028/23063/25842/25913/26155/26255/26271/51451/51750/54552/54880/55755/55795/55818/65057	31
LIHC	GO:0010833	telomere maintenance via telomere lengthening	21/2129	53/11229	0.000374935	0.0119447	0.0112895	1736/3178/3181/4216/4361/5394/5570/5588/5594/6950/7520/10574/10575/22948/25913/51750/54433/54552/55505/64858/65057	21
LIHC	GO:0006323	DNA packaging	41/2129	130/11229	0.000384644	0.0121788	0.0115107	1029/1616/3009/3065/3148/4152/4673/4678/4869/6418/6839/8340/8520/8607/8815/9025/9869/10036/10541/10592/10664/22880/23063/23378/23421/25836/25842/26155/50809/51548/54107/54623/54892/55320/55839/79682/79711/79829/83743/201254/653604	41
LIHC	GO:1901796	regulation of signal transduction by p53 class mediator	38/2129	118/11229	0.000391079	0.0123071	0.011632	1020/1457/1459/1763/3065/3066/3190/3622/4361/5884/5932/5982/6118/6125/6201/6749/6878/6883/7314/7862/8148/8805/8851/9219/9349/9521/10269/10848/23028/26155/51230/54971/55003/64844/83860/84289/112858/149628	38
LIHC	GO:0006997	nucleus organization	31/2129	92/11229	0.000549656	0.0167857	0.0158649	1639/3148/5518/5578/6683/7341/7443/8815/9025/9221/9519/10269/22927/23435/23481/23592/26135/53371/55706/55818/55968/57602/64645/79188/80346/81929/84172/128866/129401/165324/255919	31
LIHC	GO:0045727	positive regulation of translation	31/2129	92/11229	0.000549656	0.0167857	0.0158649	387/1660/1994/3184/3673/3692/4869/5594/6125/6198/6895/8087/8664/8872/9775/10605/10657/22927/23107/23185/51441/51654/54915/54931/55005/57409/65109/79072/84881/285367/387338	31
LIHC	GO:0006378	mRNA polyadenylation	16/2129	37/11229	0.000588859	0.0176692	0.0167	1478/1479/2926/6626/6829/22828/25962/29101/29894/51692/54623/55149/56254/79577/81608/87178	16
LIHC	GO:0033047	regulation of mitotic sister chromatid segregation	16/2129	37/11229	0.000588859	0.0176692	0.0167	4085/5885/8678/9183/9184/10459/23137/25836/26255/26271/51451/55755/55781/55795/64682/84250	16
LIHC	GO:0009303	rRNA transcription	11/2129	21/11229	0.00059606	0.0177819	0.0168065	2975/2976/4691/6597/9328/9330/10360/10849/84172/84365/112495	11
LIHC	GO:0016925	protein sumoylation	20/2129	51/11229	0.000601064	0.0178281	0.0168502	5905/6613/6804/7341/8480/8554/9759/10055/10401/23279/25950/29843/53371/54552/55706/57691/79902/81929/83637/129401	20
LIHC	GO:0032210	regulation of telomere maintenance via telomerase	15/2129	34/11229	0.000672925	0.0196284	0.0185517	1736/3178/4216/5394/5570/5588/5594/6950/7520/10574/10575/22948/25913/54552/65057	15
LIHC	GO:0090501	RNA phosphodiester bond hydrolysis	34/2129	105/11229	0.000692087	0.0200666	0.0189659	328/1478/1479/4686/4848/5393/5394/5511/7247/9337/9941/10557/22803/23016/23019/23283/23404/27161/28987/29102/29894/51692/51728/65095/79033/79042/79650/80746/81608/81875/84294/87178/118460/192669	34
LIHC	GO:0070972	protein localization to endoplasmic reticulum	39/2129	126/11229	0.000794048	0.0226161	0.0213755	3921/6125/6128/6130/6138/6141/6143/6146/6147/6152/6155/6157/6159/6161/6165/6167/6169/6175/6189/6193/6194/6201/6202/6206/6207/6208/6217/6228/6233/6730/6731/9045/9349/10890/10945/54557/55973/81573/128866	39
LIHC	GO:0031497	chromatin assembly	35/2129	110/11229	0.000832505	0.0234785	0.0221906	1029/1616/3009/3065/3148/4152/4673/4678/4869/6418/6839/8340/8520/8607/9869/10036/10541/10664/22880/23378/23421/25842/26155/50809/51548/54107/54623/55320/55839/79682/79711/79829/83743/201254/653604	35
LIHC	GO:0016574	histone ubiquitination	16/2129	38/11229	0.000839978	0.0235605	0.0222681	648/4591/7324/8450/9025/9320/23028/23512/51322/54623/54880/55100/56254/57332/79577/84759	16
LIHC	GO:0000381	regulation of alternative mRNA splicing, via spliceosome	18/2129	45/11229	0.00084565	0.0235914	0.0222973	3178/3191/5936/6428/6432/9589/9939/10181/10657/10772/10921/10929/27316/29890/55234/58517/64783/84991	18
LIHC	GO:0022616	DNA strand elongation	8/2129	13/11229	0.000851929	0.0236387	0.0223421	1763/4361/5111/10714/25913/51659/64785/64858	8
LIHC	GO:0006409	tRNA export from nucleus	9/2129	16/11229	0.000977784	0.0264206	0.0249713	6396/6741/8480/23279/53371/55706/79902/81929/129401	9
LIHC	GO:0071431	tRNA-containing ribonucleoprotein complex export from nucleus	9/2129	16/11229	0.000977784	0.0264206	0.0249713	6396/6741/8480/23279/53371/55706/79902/81929/129401	9
LIHC	GO:0048285	organelle fission	68/2129	252/11229	0.00103015	0.0276906	0.0261716	387/898/994/1164/2175/3304/3622/3832/4085/4361/4603/5518/5885/5889/5892/5902/6152/6683/7155/7314/8243/8678/9183/9184/9820/10005/10059/10096/10459/10592/10734/23063/23122/23137/23244/23383/25836/26255/26271/28984/49856/51451/54820/55023/55125/55706/55737/55755/55781/55795/55968/56647/56947/64682/79598/79703/79980/80821/81929/84057/84250/84930/113510/128866/145645/157777/201254/245711	68
LIHC	GO:0016579	protein deubiquitination	53/2129	187/11229	0.0010882	0.0290994	0.0275032	387/4088/4738/5688/5690/5705/5707/5713/5715/6233/6885/7314/7321/7398/8027/8464/8607/8665/8678/8724/8975/9097/9100/9738/9825/9929/9960/9986/10213/10713/23358/51035/51633/51720/54891/55288/57602/57646/57695/64750/79913/84142/84196/84669/85015/90268/93973/125476/159195/171023/220213/221937/283899	53
LIHC	GO:0007004	telomere maintenance via telomerase	18/2129	46/11229	0.00114623	0.0301822	0.0285265	1736/3178/4216/4361/5394/5570/5588/5594/6950/7520/10574/10575/22948/25913/54433/54552/55505/65057	18
LIHC	GO:0042073	intraciliary transport	18/2129	46/11229	0.00114623	0.0301822	0.0285265	3842/8655/11127/22920/26146/26160/51098/51626/51668/57539/57560/79809/79989/80173/83658/89891/117178/166379	18
LIHC	GO:2000779	regulation of double-strand break repair	18/2129	46/11229	0.00114623	0.0301822	0.0285265	4255/5531/6118/7913/9320/9400/10459/23028/29072/51548/51750/55086/55100/56893/64210/79000/84250/84893	18
LIHC	GO:0043631	RNA polyadenylation	16/2129	39/11229	0.00117653	0.0308228	0.029132	1478/1479/2926/6626/6829/22828/25962/29101/29894/51692/54623/55149/56254/79577/81608/87178	16
LIHC	GO:0043632	modification-dependent macromolecule catabolic process	114/2129	463/11229	0.00123746	0.0320932	0.0303328	550/819/1452/1453/1454/1457/1459/2629/2768/3304/4085/4738/4850/5094/5393/5394/5688/5690/5705/5707/5713/5715/5930/6125/6201/6233/6613/7314/7321/7324/7327/7332/7341/7398/7471/8312/8405/8450/8453/8454/8554/8975/9025/9097/9100/9147/9184/9320/9349/9616/9820/9960/9978/10213/10269/10399/11011/11124/11146/11253/22954/23016/23352/23358/23404/23510/23607/26271/28952/29843/30009/51035/51283/51322/54431/5447…	114
LIHC	GO:0036297	interstrand cross-link repair	13/2129	29/11229	0.00127333	0.0326949	0.0309014	2175/2176/5892/6118/6233/7314/7398/9025/55120/55159/64421/64858/201254	13
LIHC	GO:0043486	histone exchange	13/2129	29/11229	0.00127333	0.0326949	0.0309014	4678/4869/5757/8607/9025/23421/54107/55320/55839/55929/79682/81611/201254	13
LIHC	GO:2000573	positive regulation of DNA biosynthetic process	17/2129	43/11229	0.00136432	0.0348578	0.0329457	1736/3178/3181/3184/4216/5570/5588/5594/5982/6950/7520/10574/10575/22948/25913/28984/65057	17
LIHC	GO:0000463	maturation of LSU-rRNA from tricistronic rRNA transcript (SSU-rRNA, 5.8S rRNA, LSU-rRNA)	7/2129	11/11229	0.00140378	0.0351694	0.0332401	8886/9326/9875/23481/23560/54680/285855	7
LIHC	GO:0007549	dosage compensation	7/2129	11/11229	0.00140378	0.0351694	0.0332401	5394/9425/10209/29890/55791/64783/91746	7
LIHC	GO:0009048	dosage compensation by inactivation of X chromosome	7/2129	11/11229	0.00140378	0.0351694	0.0332401	5394/9425/10209/29890/55791/64783/91746	7
LIHC	GO:0033523	histone H2B ubiquitination	7/2129	11/11229	0.00140378	0.0351694	0.0332401	7324/9025/51322/54623/55100/56254/79577	7
LIHC	GO:0006278	RNA-dependent DNA biosynthetic process	18/2129	47/11229	0.00153302	0.038038	0.0359514	1736/3178/4216/4361/5394/5570/5588/5594/6950/7520/10574/10575/22948/25913/54433/54552/55505/65057	18
LIHC	GO:1905515	non-motile cilium assembly	18/2129	47/11229	0.00153302	0.038038	0.0359514	1453/1639/4134/8195/8655/9662/10801/23322/25886/26160/49856/51098/54903/55212/57560/80173/84902/200728	18
LIHC	GO:0001522	pseudouridine synthesis	8/2129	14/11229	0.0016582	0.0401783	0.0379744	1736/54433/54517/55505/84881/113000/126789/285367	8
LIHC	GO:0034472	snRNA 3'-end processing	8/2129	14/11229	0.0016582	0.0401783	0.0379744	5393/23016/23404/26173/57117/57508/79650/118460	8
LIHC	GO:0051444	negative regulation of ubiquitin-protein transferase activity	8/2129	14/11229	0.0016582	0.0401783	0.0379744	25/4085/6125/6201/9349/9532/10459/26271	8
LIHC	GO:0045292	mRNA cis splicing, via spliceosome	10/2129	20/11229	0.00168488	0.0406339	0.038405	4686/5936/6428/6432/9092/10772/10929/11168/23020/55696	10
LIHC	GO:0051031	tRNA transport	9/2129	17/11229	0.00172987	0.0411421	0.0388853	6396/6741/8480/23279/53371/55706/79902/81929/129401	9
LIHC	GO:0070199	establishment of protein localization to chromosome	9/2129	17/11229	0.00172987	0.0411421	0.0388853	1736/3009/6950/10574/10575/22948/25836/25913/65057	9
LIHC	GO:1904666	regulation of ubiquitin protein ligase activity	9/2129	17/11229	0.00172987	0.0411421	0.0388853	4085/6125/6201/9349/9532/10059/10459/26271/84930	9
LIHC	GO:0006383	transcription by RNA polymerase III	17/2129	44/11229	0.00183605	0.0428772	0.0405252	2975/2976/6618/6738/9328/9330/9519/9533/10621/10622/10625/23379/51728/55814/57521/112495/171568	17
LIHC	GO:0006283	transcription-coupled nucleotide-excision repair	21/2129	59/11229	0.00191339	0.0436947	0.0412979	1022/2071/2873/2965/5111/5431/5982/6118/6233/7314/7515/8450/9978/10450/10714/10920/10980/27339/51138/57461/91603	21
LIHC	GO:0098840	protein transport along microtubule	21/2129	59/11229	0.00191339	0.0436947	0.0412979	3799/3842/5813/6421/8655/11127/22920/26146/26160/51098/51626/51668/57539/57560/79809/79989/80173/83658/89891/117178/166379	21
LIHC	GO:0099118	microtubule-based protein transport	21/2129	59/11229	0.00191339	0.0436947	0.0412979	3799/3842/5813/6421/8655/11127/22920/26146/26160/51098/51626/51668/57539/57560/79809/79989/80173/83658/89891/117178/166379	21
LIHC	GO:0031396	regulation of protein ubiquitination	44/2129	153/11229	0.00202651	0.0456716	0.0431663	25/648/819/1020/1616/2280/2534/3304/4085/6125/6201/7314/7321/7332/8312/8767/8915/9320/9349/9532/10016/10059/10459/10625/11146/11170/23028/23560/26271/51035/51256/54552/55100/56254/57561/64844/84259/84930/153769/165324/201254/285671/374969/553115	44
LIHC	GO:0045005	DNA-dependent DNA replication maintenance of fidelity	12/2129	27/11229	0.00213307	0.047248	0.0446563	1763/4361/5111/10189/50485/51750/54962/55159/84893/91603/201254/253714	12
LIHC	GO:0051973	positive regulation of telomerase activity	12/2129	27/11229	0.00213307	0.047248	0.0446563	1736/3181/3184/4216/5570/5588/5594/6950/7520/10575/25913/65057	12
LIHC	GO:0006289	nucleotide-excision repair	26/2129	79/11229	0.0021764	0.0480016	0.0453685	1022/2071/2176/2873/2965/5111/5431/5932/5982/6118/6233/7314/7515/8450/9978/10450/10714/10920/10980/27339/27343/51138/57461/64210/85015/91603	26
LIHC	GO:1901991	negative regulation of mitotic cell cycle phase transition	41/2129	141/11229	0.00225934	0.0494086	0.0466983	1029/1031/1032/2810/3276/4085/4361/4848/4850/5111/5688/5690/5705/5707/5713/5715/5884/5885/6118/7465/8454/8883/9183/9184/9337/9978/10213/10217/10459/11170/23019/26058/26271/28984/51451/55159/55755/55795/60561/79577/91603	41
MESO	GO:0000280	nuclear division	74/660	339/12764	4.02606e-27	8.48894e-24	7.85081e-24	332/699/891/898/990/991/995/1062/1063/1111/1164/2177/2316/3832/3833/4085/4288/4603/4605/4751/5347/5719/6790/7153/7272/7283/8438/9055/9088/9134/9212/9232/9319/9493/9700/9735/9787/9918/9928/10403/10460/10609/10615/11004/11065/11130/22974/23310/23397/23636/24137/26271/27338/29127/29893/51343/54443/54908/54984/55143/63979/64105/64151/79980/81620/83540/83903/83990/84057/113130/146909/146956/151246/151…	74
MESO	GO:0048285	organelle fission	76/660	376/12764	1.43115e-25	1.50879e-22	1.39538e-22	332/699/891/898/990/991/995/1062/1063/1111/1164/1723/2177/2316/3832/3833/4085/4288/4603/4605/4751/5347/5719/6790/7153/7272/7283/8438/9055/9088/9134/9212/9232/9319/9493/9700/9735/9787/9918/9928/10403/10460/10609/10615/11004/11065/11130/22974/23310/23397/23636/24137/26271/27338/29127/29893/51343/54443/54908/54984/55143/63979/64105/64151/79980/81620/83540/83903/83990/84057/113115/113130/146909/14695…	76
MESO	GO:0006260	DNA replication	54/660	242/12764	1.80821e-20	8.47247e-18	7.83558e-18	641/672/890/898/983/990/1111/1763/2237/3978/4171/4176/4796/4998/5001/5111/5422/5424/5425/5426/5879/5982/6241/6749/8208/8318/8914/9134/9156/9401/9768/9837/10036/10721/11124/11169/23594/26271/29980/51053/51514/55388/79733/79915/80119/81620/83990/84296/84515/90381/92675/144455/146956/157570	54
MESO	GO:1901990	regulation of mitotic cell cycle phase transition	62/660	367/12764	6.47373e-17	2.27498e-14	2.10396e-14	641/672/699/891/898/983/990/991/993/995/1019/1021/1062/1063/1639/1869/2068/2146/3161/3276/4085/4751/4998/5111/5347/5702/5704/5709/5719/6790/7272/7283/7846/8318/9212/9319/9700/9735/9787/9928/10403/11065/11190/22974/26271/29883/29980/51343/51512/51514/54443/54908/54984/60561/79733/79915/81620/84131/85417/90381/113130/144455	62
MESO	GO:0006261	DNA-dependent DNA replication	36/660	139/12764	3.2624e-16	9.17169e-14	8.48224e-14	641/898/990/1763/2237/3978/4171/4176/4796/4998/5001/5111/5422/5424/5425/5426/5982/8318/8914/9134/9401/9837/10721/11169/23594/26271/29980/51053/55388/79733/79915/81620/84296/90381/144455/146956	36
MESO	GO:1901991	negative regulation of mitotic cell cycle phase transition	38/660	201/12764	2.40946e-12	3.62882e-10	3.35604e-10	641/672/699/891/983/990/991/995/1019/1021/1063/1869/2146/3276/4085/4998/5111/5347/5702/5704/5709/5719/6790/7272/9212/9319/10403/26271/29883/29980/51512/54908/54984/60561/79733/81620/90381/144455	38
MESO	GO:0006281	DNA repair	64/660	483/12764	2.57191e-12	3.63053e-10	3.35762e-10	641/672/983/1111/1763/2068/2177/2187/2237/2305/3014/3148/3978/4171/4176/4521/4796/5111/5422/5424/5425/5426/5982/6749/7335/7468/7516/7979/8208/8318/8367/8438/8914/9156/9232/9319/9401/9768/10036/10155/10635/10721/10856/10980/11169/29089/29128/51343/51514/55215/56852/57461/63979/79000/79677/80119/83990/84296/84515/90381/113130/146956/157570/199720	64
MESO	GO:1902749	regulation of cell cycle G2/M phase transition	37/660	192/12764	2.58278e-12	3.63053e-10	3.35762e-10	641/672/891/983/990/993/995/1019/1063/1111/1639/3161/4751/4998/5347/5702/5704/5709/5719/6790/7283/7846/9212/9928/11190/22974/26271/29980/51343/51512/51514/54984/60561/79915/84131/85417/90381	37
MESO	GO:0000086	G2/M transition of mitotic cell cycle	40/660	222/12764	3.14325e-12	4.27583e-10	3.95441e-10	641/672/890/891/983/990/993/995/1019/1063/1639/2305/3161/4751/4998/5243/5347/5702/5704/5709/5719/6790/7283/7846/9088/9133/9212/9833/9928/11113/11190/22974/26271/29980/51514/54984/60561/84131/85417/90381	40
MESO	GO:0000082	G1/S transition of mitotic cell cycle	38/660	213/12764	1.51578e-11	1.88001e-09	1.73869e-09	815/891/898/983/990/993/995/1019/1021/1033/1869/1978/2146/3276/4171/4176/4998/5001/5111/5422/5426/6241/6790/7298/8318/9134/9928/23594/26271/29883/51053/51512/55388/79733/81620/84515/128239/144455	38
MESO	GO:0010965	regulation of mitotic sister chromatid separation	19/660	57/12764	2.79815e-11	3.18914e-09	2.9494e-09	699/891/990/991/1062/1063/4085/5347/7272/9212/9232/9319/9700/9787/10403/10460/26271/54908/81620	19
MESO	GO:0051783	regulation of nuclear division	32/660	163/12764	4.78846e-11	5.31393e-09	4.91447e-09	699/891/990/991/995/1062/1063/1111/3832/4085/4288/4751/5347/6790/7272/9088/9212/9232/9319/9700/9735/9787/10403/10460/11065/23636/26271/51343/54443/54908/81620/113130	32
MESO	GO:0071103	DNA conformation change	44/660	288/12764	8.0526e-11	8.46165e-09	7.82557e-09	641/891/983/1058/1763/2068/2491/3014/3148/4171/4176/4674/4676/5982/7153/8208/8318/8367/8438/9401/9837/9918/10036/10155/10721/10856/22880/23310/23397/54821/54892/55355/55839/56852/64105/64151/79019/79172/80119/83990/84296/84515/91687/113130	44
MESO	GO:0007091	metaphase/anaphase transition of mitotic cell cycle	18/660	54/12764	9.34682e-11	9.38466e-09	8.67919e-09	699/891/990/991/1062/1063/4085/5347/7272/9212/9319/9700/9787/10403/10460/26271/54908/81620	18
MESO	GO:0010389	regulation of G2/M transition of mitotic cell cycle	33/660	177/12764	1.01044e-10	9.73114e-09	8.99963e-09	641/672/891/983/990/993/995/1019/1063/1639/3161/4751/4998/5347/5702/5704/5709/5719/6790/7283/7846/9212/9928/11190/22974/26271/29980/51514/54984/60561/84131/85417/90381	33
MESO	GO:0030071	regulation of mitotic metaphase/anaphase transition	17/660	51/12764	3.12309e-10	2.74376e-08	2.53751e-08	699/891/990/991/1062/1063/4085/5347/7272/9212/9319/9700/9787/10403/26271/54908/81620	17
MESO	GO:0006310	DNA recombination	38/660	237/12764	3.93066e-10	3.38278e-08	3.12849e-08	641/672/1111/2068/2187/2237/3014/3148/3838/4171/4176/4796/6929/7153/7468/7516/7979/8318/8438/8741/8914/9156/9319/9401/10635/10721/10856/29893/63979/79000/79677/79915/80119/83990/84057/84296/84515/146956	38
MESO	GO:1902099	regulation of metaphase/anaphase transition of cell cycle	17/660	52/12764	4.41967e-10	3.72755e-08	3.44734e-08	699/891/990/991/1062/1063/4085/5347/7272/9212/9319/9700/9787/10403/26271/54908/81620	17
MESO	GO:0006270	DNA replication initiation	14/660	34/12764	4.53003e-10	3.74571e-08	3.46414e-08	898/990/4171/4176/4998/5001/5422/5426/8318/9134/23594/55388/81620/90381	14
MESO	GO:0033044	regulation of chromosome organization	44/660	305/12764	5.34552e-10	4.25322e-08	3.9335e-08	672/699/891/908/990/991/1062/1063/1111/1789/2237/2625/4085/4171/4216/4288/4602/4674/4751/5347/6950/7153/7203/7272/8318/9212/9232/9319/9700/9787/10155/10403/10460/10575/10576/10856/22880/26147/26271/54908/54984/80119/81620/113130	44
MESO	GO:0033047	regulation of mitotic sister chromatid segregation	19/660	68/12764	8.6056e-10	6.72034e-08	6.21516e-08	699/891/990/991/1062/1063/4085/5347/7272/9212/9232/9319/9700/9787/10403/10460/26271/54908/81620	19
MESO	GO:0034502	protein localization to chromosome	20/660	80/12764	2.65841e-09	1.93285e-07	1.78755e-07	908/983/1058/2146/5347/6950/7203/7272/9212/10403/10575/10576/10856/54908/54984/81620/83903/84515/113130/157570	20
MESO	GO:2000816	negative regulation of mitotic sister chromatid separation	14/660	39/12764	3.85649e-09	2.66603e-07	2.46562e-07	699/891/991/1063/4085/5347/7272/9212/9232/9319/10403/26271/54908/81620	14
MESO	GO:0000723	telomere maintenance	26/660	139/12764	9.24594e-09	6.09221e-07	5.63424e-07	641/898/908/1763/2237/4216/4751/5111/5422/5424/5425/5426/5982/6950/7203/8367/9134/9156/9212/9401/10575/10576/10728/54984/79677/80119	26
MESO	GO:0006271	DNA strand elongation involved in DNA replication	9/660	15/12764	9.47223e-09	6.14529e-07	5.68334e-07	1763/3978/4176/5111/5422/5425/5426/9837/84296	9
MESO	GO:0033048	negative regulation of mitotic sister chromatid segregation	14/660	42/12764	1.16937e-08	7.47156e-07	6.90991e-07	699/891/991/1063/4085/5347/7272/9212/9232/9319/10403/26271/54908/81620	14
MESO	GO:0045841	negative regulation of mitotic metaphase/anaphase transition	13/660	36/12764	1.28813e-08	7.98831e-07	7.38781e-07	699/891/991/1063/4085/5347/7272/9212/9319/10403/26271/54908/81620	13
MESO	GO:1902100	negative regulation of metaphase/anaphase transition of cell cycle	13/660	36/12764	1.28813e-08	7.98831e-07	7.38781e-07	699/891/991/1063/4085/5347/7272/9212/9319/10403/26271/54908/81620	13
MESO	GO:0072422	signal transduction involved in DNA damage checkpoint	17/660	67/12764	3.27498e-08	1.84141e-06	1.70299e-06	672/891/983/995/1111/1869/3276/5111/5347/6790/29883/51343/51512/51514/60561/79733/144455	17
MESO	GO:0032200	telomere organization	26/660	148/12764	3.57168e-08	1.98181e-06	1.83284e-06	641/898/908/1763/2237/4216/4751/5111/5422/5424/5425/5426/5982/6950/7203/8367/9134/9156/9212/9401/10575/10576/10728/54984/79677/80119	26
MESO	GO:0006302	double-strand break repair	32/660	211/12764	3.82844e-08	2.09669e-06	1.93908e-06	641/672/1111/1763/2187/2237/2305/3014/4171/4176/4796/5422/7468/7516/7979/8318/8367/8438/8914/9319/9401/10635/10721/63979/79000/83990/84296/84515/113130/146956/157570/199720	32
MESO	GO:0051784	negative regulation of nuclear division	15/660	53/12764	4.29902e-08	2.2948e-06	2.1223e-06	699/891/991/1063/1111/4085/5347/7272/9212/9232/9319/10403/26271/54908/81620	15
MESO	GO:0007094	mitotic spindle assembly checkpoint	12/660	34/12764	6.34513e-08	3.18541e-06	2.94595e-06	699/891/991/1063/4085/5347/7272/9212/9319/10403/54908/81620	12
MESO	GO:1902750	negative regulation of cell cycle G2/M phase transition	19/660	91/12764	1.51884e-07	7.36199e-06	6.80857e-06	641/672/983/990/1111/4998/5347/5702/5704/5709/5719/6790/9212/29980/51343/51514/54984/60561/90381	19
MESO	GO:0000079	regulation of cyclin-dependent protein serine/threonine kinase activity	18/660	83/12764	1.75593e-07	8.4145e-06	7.78197e-06	60/641/890/891/898/899/990/993/995/1019/1033/1164/5347/8851/9088/9133/9134/85417	18
MESO	GO:0006275	regulation of DNA replication	19/660	92/12764	1.82319e-07	8.63864e-06	7.98925e-06	641/890/983/990/1763/5111/5879/5982/8914/11124/26271/29980/51053/79733/79915/81620/90381/144455/157570	19
MESO	GO:0030199	collagen fibril organization	13/660	46/12764	3.51073e-07	1.62689e-05	1.5046e-05	871/1289/1290/1301/1303/4015/4017/5033/5351/7837/8985/10609/79709	13
MESO	GO:0006323	DNA packaging	27/660	179/12764	4.96183e-07	2.2499e-05	2.08077e-05	891/983/1058/2491/3014/3148/4171/4674/4676/7153/8208/8367/9918/10036/10155/22880/23310/23397/54892/55355/55839/64105/64151/79019/79172/91687/113130	27
MESO	GO:0022616	DNA strand elongation	9/660	22/12764	6.78243e-07	3.04271e-05	2.81399e-05	1763/3978/4176/5111/5422/5425/5426/9837/84296	9
MESO	GO:0032392	DNA geometric change	20/660	110/12764	7.64749e-07	3.39468e-05	3.1395e-05	641/1763/2068/3148/4171/4176/5982/7153/8318/8438/9401/9837/10721/10856/54821/56852/80119/83990/84296/84515	20
MESO	GO:0000724	double-strand break repair via homologous recombination	21/660	120/12764	7.85686e-07	3.45129e-05	3.19185e-05	641/672/1111/2187/2237/3014/4171/4176/4796/7516/7979/8318/8438/8914/9401/10635/10721/63979/79000/84296/84515	21
MESO	GO:0000725	recombinational repair	21/660	121/12764	9.05428e-07	3.93628e-05	3.64038e-05	641/672/1111/2187/2237/3014/4171/4176/4796/7516/7979/8318/8438/8914/9401/10635/10721/63979/79000/84296/84515	21
MESO	GO:0071897	DNA biosynthetic process	25/660	163/12764	9.54834e-07	4.10871e-05	3.79985e-05	908/1063/3978/4015/4216/4751/5111/5422/5424/5425/5426/5982/6950/7083/7203/7298/9212/9768/10575/10576/10721/10728/51514/54984/80119	25
MESO	GO:0031145	anaphase-promoting complex-dependent catabolic process	16/660	75/12764	1.07047e-06	4.55977e-05	4.217e-05	891/983/991/4085/5347/5702/5704/5709/5719/6790/9212/9232/11065/26271/27338/51343	16
MESO	GO:1901992	positive regulation of mitotic cell cycle phase transition	15/660	67/12764	1.21008e-06	5.1029e-05	4.71931e-05	891/898/983/990/993/995/1019/8318/9700/9787/11065/26271/51514/81620/113130	15
MESO	GO:0090307	mitotic spindle assembly	13/660	53/12764	2.0759e-06	8.58243e-05	7.93727e-05	332/991/2316/3832/3833/4605/4751/5347/9212/9493/22974/24137/29127	13
MESO	GO:2001251	negative regulation of chromosome organization	21/660	128/12764	2.33322e-06	9.55261e-05	8.83452e-05	672/699/891/991/1063/1789/4085/4171/5347/7153/7272/9212/9232/9319/9700/10403/26271/54908/54984/80119/81620	21
MESO	GO:0051383	kinetochore organization	8/660	20/12764	3.5448e-06	0.000142366	0.000131664	1058/1062/1063/10403/55839/64105/81620/83540	8
MESO	GO:0032508	DNA duplex unwinding	18/660	102/12764	4.2335e-06	0.000168421	0.000155761	641/1763/2068/4171/4176/5982/7153/8318/9401/9837/10721/10856/54821/56852/80119/83990/84296/84515	18
MESO	GO:0071459	protein localization to chromosome, centromeric region	8/660	21/12764	5.46777e-06	0.000209615	0.000193857	983/1058/7272/9212/10403/54908/81620/83903	8
MESO	GO:0031572	G2 DNA damage checkpoint	9/660	28/12764	7.11664e-06	0.000267954	0.000247811	641/672/983/1111/5347/29980/51343/51514/60561	9
MESO	GO:0034501	protein localization to kinetochore	7/660	17/12764	1.18101e-05	0.000440735	0.000407604	983/7272/9212/10403/54908/81620/83903	7
MESO	GO:0010972	negative regulation of G2/M transition of mitotic cell cycle	15/660	80/12764	1.24202e-05	0.00045944	0.000424903	641/672/983/990/4998/5702/5704/5709/5719/6790/9212/29980/54984/60561/90381	15
MESO	GO:0072425	signal transduction involved in G2 DNA damage checkpoint	6/660	12/12764	1.32072e-05	0.000484303	0.000447897	672/1111/5347/51343/51514/60561	6
MESO	GO:0040001	establishment of mitotic spindle localization	9/660	30/12764	1.34298e-05	0.000488218	0.000451518	1058/1639/4085/5347/9700/10403/29899/54908/89958	9
MESO	GO:1902402	signal transduction involved in mitotic DNA damage checkpoint	12/660	54/12764	1.53035e-05	0.000537789	0.000497362	891/983/995/1869/3276/5111/6790/29883/51512/60561/79733/144455	12
MESO	GO:1902403	signal transduction involved in mitotic DNA integrity checkpoint	12/660	54/12764	1.53035e-05	0.000537789	0.000497362	891/983/995/1869/3276/5111/6790/29883/51512/60561/79733/144455	12
MESO	GO:0034508	centromere complex assembly	11/660	46/12764	1.64968e-05	0.000574933	0.000531714	1058/1062/1063/2491/8367/55355/55839/64105/79019/79172/91687	11
MESO	GO:0065004	protein-DNA complex assembly	25/660	193/12764	2.06097e-05	0.00068434	0.000632897	1058/1062/1063/2068/2491/3014/3148/4171/4176/4674/4676/5702/5704/8208/8318/8367/10036/51053/55355/55839/64105/79019/79172/81620/91687	25
MESO	GO:0045740	positive regulation of DNA replication	9/660	32/12764	2.3988e-05	0.000790292	0.000730885	983/1763/5111/5879/11124/79733/79915/81620/144455	9
MESO	GO:2001252	positive regulation of chromosome organization	22/660	160/12764	2.52638e-05	0.000825871	0.000763788	672/891/908/1789/2237/2625/4216/4602/4674/4751/6950/7203/9212/9700/9787/10155/10575/10576/10856/22880/26147/81620	22
MESO	GO:0000132	establishment of mitotic spindle orientation	8/660	26/12764	3.33366e-05	0.00107313	0.000992465	1058/1639/4085/5347/10403/29899/54908/89958	8
MESO	GO:1900180	regulation of protein localization to nucleus	16/660	97/12764	3.43569e-05	0.0010976	0.00101509	908/983/1894/2316/5347/6950/7203/10155/10575/10576/11261/23636/29775/51512/51715/54984	16
MESO	GO:0044773	mitotic DNA damage checkpoint	15/660	88/12764	4.04428e-05	0.00126331	0.00116835	641/891/983/995/1869/3276/5111/6790/29883/29980/51512/60561/79733/144455/146956	15
MESO	GO:1902751	positive regulation of cell cycle G2/M phase transition	8/660	27/12764	4.52427e-05	0.00136278	0.00126033	891/983/993/995/1019/26271/51514/79915	8
MESO	GO:0034080	CENP-A containing nucleosome assembly	9/660	35/12764	5.25239e-05	0.0015489	0.00143247	1058/2491/8367/55355/55839/64105/79019/79172/91687	9
MESO	GO:0061641	CENP-A containing chromatin organization	9/660	35/12764	5.25239e-05	0.0015489	0.00143247	1058/2491/8367/55355/55839/64105/79019/79172/91687	9
MESO	GO:0006977	DNA damage response, signal transduction by p53 class mediator resulting in cell cycle arrest	11/660	52/12764	5.62743e-05	0.00164798	0.0015241	891/983/995/1869/3276/5111/6790/29883/51512/79733/144455	11
MESO	GO:1904666	regulation of ubiquitin protein ligase activity	7/660	21/12764	5.88766e-05	0.0017123	0.00158358	991/4085/5347/11065/26271/27338/51343	7
MESO	GO:0043486	histone exchange	10/660	44/12764	6.39539e-05	0.00183465	0.00169674	1058/2491/8367/55355/55839/64105/79019/79172/81611/91687	10
MESO	GO:0006334	nucleosome assembly	16/660	102/12764	6.46e-05	0.00184066	0.0017023	1058/2491/3014/3148/4171/4674/4676/8208/8367/10036/55355/55839/64105/79019/79172/91687	16
MESO	GO:0072431	signal transduction involved in mitotic G1 DNA damage checkpoint	11/660	53/12764	6.77438e-05	0.0019045	0.00176134	891/983/995/1869/3276/5111/6790/29883/51512/79733/144455	11
MESO	GO:1902400	intracellular signal transduction involved in G1 DNA damage checkpoint	11/660	53/12764	6.77438e-05	0.0019045	0.00176134	891/983/995/1869/3276/5111/6790/29883/51512/79733/144455	11
MESO	GO:1903405	protein localization to nuclear body	5/660	10/12764	7.3829e-05	0.00202167	0.00186969	908/6950/7203/10575/10576	5
MESO	GO:1904867	protein localization to Cajal body	5/660	10/12764	7.3829e-05	0.00202167	0.00186969	908/6950/7203/10575/10576	5
MESO	GO:0071824	protein-DNA complex subunit organization	26/660	222/12764	8.13264e-05	0.0022126	0.00204628	1058/1062/1063/2068/2491/3014/3148/4171/4176/4674/4676/5702/5704/8208/8318/8367/10036/51053/55355/55839/64105/79019/79172/81611/81620/91687	26
MESO	GO:0030261	chromosome condensation	9/660	38/12764	0.000105499	0.00279804	0.00258771	891/983/7153/9918/23310/23397/54892/64151/113130	9
MESO	GO:2000045	regulation of G1/S transition of mitotic cell cycle	18/660	130/12764	0.000123343	0.00325086	0.00300649	891/898/983/990/995/1019/1021/1869/2146/3276/5111/6790/8318/9928/29883/51512/79733/144455	18
MESO	GO:1902806	regulation of cell cycle G1/S phase transition	19/660	142/12764	0.000128442	0.0033063	0.00305776	891/898/983/990/995/1019/1021/1869/2146/3276/5111/6790/8318/9928/29883/51512/79733/81610/144455	19
MESO	GO:0070203	regulation of establishment of protein localization to telomere	5/660	11/12764	0.000129598	0.0033063	0.00305776	908/6950/7203/10575/10576	5
MESO	GO:1904668	positive regulation of ubiquitin protein ligase activity	5/660	11/12764	0.000129598	0.0033063	0.00305776	991/5347/11065/27338/51343	5
MESO	GO:1990173	protein localization to nucleoplasm	5/660	11/12764	0.000129598	0.0033063	0.00305776	908/6950/7203/10575/10576	5
MESO	GO:0031055	chromatin remodeling at centromere	9/660	39/12764	0.000130935	0.0033063	0.00305776	1058/2491/8367/55355/55839/64105/79019/79172/91687	9
MESO	GO:0045005	DNA-dependent DNA replication maintenance of fidelity	9/660	39/12764	0.000130935	0.0033063	0.00305776	641/1763/4796/5111/5424/5426/8914/29980/146956	9
MESO	GO:0090329	regulation of DNA-dependent DNA replication	10/660	48/12764	0.000139821	0.0034889	0.00322664	641/5982/8914/26271/29980/51053/79733/81620/90381/144455	10
MESO	GO:0010971	positive regulation of G2/M transition of mitotic cell cycle	7/660	24/12764	0.000152969	0.00377233	0.00348876	891/983/993/995/1019/26271/51514	7
MESO	GO:0031571	mitotic G1 DNA damage checkpoint	11/660	58/12764	0.000159924	0.00389825	0.00360522	891/983/995/1869/3276/5111/6790/29883/51512/79733/144455	11
MESO	GO:0044783	G1 DNA damage checkpoint	11/660	59/12764	0.000187545	0.00449362	0.00415583	891/983/995/1869/3276/5111/6790/29883/51512/79733/144455	11
MESO	GO:0032210	regulation of telomere maintenance via telomerase	10/660	50/12764	0.000200008	0.0047054	0.00435169	908/4216/4751/6950/7203/9212/10575/10576/54984/80119	10
MESO	GO:0090670	RNA localization to Cajal body	6/660	18/12764	0.000203079	0.0047054	0.00435169	908/6950/7203/10575/10576/10856	6
MESO	GO:0090671	telomerase RNA localization to Cajal body	6/660	18/12764	0.000203079	0.0047054	0.00435169	908/6950/7203/10575/10576/10856	6
MESO	GO:0070202	regulation of establishment of protein localization to chromosome	5/660	12/12764	0.000212735	0.00484921	0.00448468	908/6950/7203/10575/10576	5
MESO	GO:0032212	positive regulation of telomere maintenance via telomerase	8/660	33/12764	0.000214819	0.00487038	0.00450426	908/4216/4751/6950/7203/9212/10575/10576	8
MESO	GO:2000134	negative regulation of G1/S transition of mitotic cell cycle	14/660	91/12764	0.000225398	0.0050829	0.00470081	891/983/995/1019/1021/1869/2146/3276/5111/6790/29883/51512/79733/144455	14
MESO	GO:1902807	negative regulation of cell cycle G1/S phase transition	14/660	93/12764	0.000284521	0.00638206	0.00590231	891/983/995/1019/1021/1869/2146/3276/5111/6790/29883/51512/79733/144455	14
MESO	GO:0007004	telomere maintenance via telomerase	11/660	63/12764	0.000341974	0.00741128	0.00685416	908/4216/4751/6950/7203/9212/10575/10576/10728/54984/80119	11
MESO	GO:0019886	antigen processing and presentation of exogenous peptide antigen via MHC class II	13/660	84/12764	0.000352611	0.0075099	0.00694537	160/163/1062/1175/1639/3797/3832/6396/9493/11004/24137/29127/56992	13
MESO	GO:0034728	nucleosome organization	17/660	130/12764	0.000377022	0.00798946	0.00738887	1058/2491/3014/3148/4171/4674/4676/8208/8367/10036/55355/55839/64105/79019/79172/81611/91687	17
MESO	GO:1904358	positive regulation of telomere maintenance via telomere lengthening	8/660	36/12764	0.000408124	0.00856248	0.00791882	908/4216/4751/6950/7203/9212/10575/10576	8
MESO	GO:0031497	chromatin assembly	18/660	143/12764	0.000412005	0.00857425	0.00792971	1058/2491/3014/3148/4171/4674/4676/8208/8367/10036/10155/22880/55355/55839/64105/79019/79172/91687	18
MESO	GO:0006336	DNA replication-independent nucleosome assembly	9/660	45/12764	0.000414785	0.00857425	0.00792971	1058/2491/8367/55355/55839/64105/79019/79172/91687	9
MESO	GO:0051972	regulation of telomerase activity	9/660	45/12764	0.000414785	0.00857425	0.00792971	4216/4751/6950/9212/10575/10576/10728/54984/80119	9
MESO	GO:0006278	RNA-dependent DNA biosynthetic process	11/660	65/12764	0.00045256	0.00917522	0.00848551	908/4216/4751/6950/7203/9212/10575/10576/10728/54984/80119	11
MESO	GO:0034724	DNA replication-independent nucleosome organization	9/660	46/12764	0.000492405	0.00976312	0.00902921	1058/2491/8367/55355/55839/64105/79019/79172/91687	9
MESO	GO:1904814	regulation of protein localization to chromosome, telomeric region	5/660	14/12764	0.000493134	0.00976312	0.00902921	908/6950/7203/10575/10576	5
MESO	GO:0006301	postreplication repair	9/660	47/12764	0.000581556	0.0113538	0.0105003	672/5111/5424/5425/5982/7335/9768/51514/56852	9
MESO	GO:0043044	ATP-dependent chromatin remodeling	11/660	68/12764	0.000673496	0.0130281	0.0120488	60/1058/2491/8367/55355/55839/64105/79019/79172/81611/91687	11
MESO	GO:0006297	nucleotide-excision repair, DNA gap filling	6/660	22/12764	0.000683545	0.0131621	0.0121727	3978/5111/5424/5425/5426/5982	6
MESO	GO:0030397	membrane disassembly	5/660	15/12764	0.000708414	0.0134567	0.0124451	891/983/1639/5347/9133	5
MESO	GO:0051081	nuclear envelope disassembly	5/660	15/12764	0.000708414	0.0134567	0.0124451	891/983/1639/5347/9133	5
MESO	GO:0051382	kinetochore assembly	5/660	15/12764	0.000708414	0.0134567	0.0124451	1058/1062/1063/55839/64105	5
MESO	GO:0000018	regulation of DNA recombination	12/660	80/12764	0.000785956	0.0148627	0.0137454	641/1111/2068/2187/3838/7468/8741/8914/10635/10721/63979/79915	12
MESO	GO:2000573	positive regulation of DNA biosynthetic process	10/660	61/12764	0.00105215	0.0198076	0.0183186	908/4216/4751/5982/6950/7203/9212/10575/10576/10728	10
MESO	GO:0010833	telomere maintenance via telomere lengthening	11/660	72/12764	0.00110116	0.0206381	0.0190867	908/4216/4751/6950/7203/9212/10575/10576/10728/54984/80119	11
MESO	GO:0000727	double-strand break repair via break-induced replication	4/660	10/12764	0.0011581	0.0212335	0.0196374	4171/4176/8318/84296	4
MESO	GO:0072697	protein localization to cell cortex	4/660	10/12764	0.0011581	0.0212335	0.0196374	5347/29899/54443/89958	4
MESO	GO:2000615	regulation of histone H3-K9 acetylation	4/660	10/12764	0.0011581	0.0212335	0.0196374	672/1111/2625/4674	4
MESO	GO:0044380	protein localization to cytoskeleton	9/660	53/12764	0.00143468	0.0259659	0.024014	6491/6790/7272/10615/11190/23636/54443/64770/81610	9
MESO	GO:0016572	histone phosphorylation	7/660	34/12764	0.00151494	0.0273012	0.025249	890/891/983/1111/6790/9212/83903	7
MESO	GO:0000731	DNA synthesis involved in DNA repair	8/660	44/12764	0.00165978	0.0297842	0.0275453	5111/5422/5424/5425/5426/5982/9768/51514	8
MESO	GO:0030330	DNA damage response, signal transduction by p53 class mediator	13/660	99/12764	0.00171488	0.0305174	0.0282234	672/891/983/995/1869/2305/3276/5111/6790/29883/51512/79733/144455	13
MESO	GO:0006282	regulation of DNA repair	14/660	111/12764	0.00171511	0.0305174	0.0282234	672/1111/2187/2305/3014/5111/7335/7468/8914/10155/10635/10721/63979/79000	14
MESO	GO:0071168	protein localization to chromatin	6/660	26/12764	0.00176767	0.0309306	0.0286054	2146/5347/10856/84515/113130/157570	6
MESO	GO:0070200	establishment of protein localization to telomere	5/660	18/12764	0.00177607	0.0309491	0.0286226	908/6950/7203/10575/10576	5
MESO	GO:0009163	nucleoside biosynthetic process	7/660	35/12764	0.0018106	0.0311645	0.0288218	1723/3614/4507/4830/4907/7083/8833	7
MESO	GO:0051973	positive regulation of telomerase activity	7/660	35/12764	0.0018106	0.0311645	0.0288218	4216/4751/6950/9212/10575/10576/10728	7
MESO	GO:0051438	regulation of ubiquitin-protein transferase activity	8/660	45/12764	0.00192897	0.0330669	0.0305812	991/4085/5347/11065/26271/27338/51343/57761	8
MESO	GO:0070199	establishment of protein localization to chromosome	6/660	27/12764	0.0021748	0.0368319	0.0340632	908/6950/7203/10575/10576/10856	6
MESO	GO:0006333	chromatin assembly or disassembly	18/660	165/12764	0.00219672	0.0370543	0.0342689	1058/2491/3014/3148/4171/4674/4676/8208/8367/10036/10155/22880/55355/55839/64105/79019/79172/91687	18
MESO	GO:0009411	response to UV	15/660	127/12764	0.00231011	0.0385048	0.0356104	993/1111/2068/2237/4216/5111/5424/9212/9768/10856/51514/55872/56852/57805/114769	15
MESO	GO:0043970	histone H3-K9 acetylation	4/660	12/12764	0.00251236	0.0417111	0.0385756	672/1111/2625/4674	4
MESO	GO:0051443	positive regulation of ubiquitin-protein transferase activity	6/660	28/12764	0.00264881	0.0432947	0.0400401	991/5347/11065/27338/51343/57761	6
MESO	GO:0072698	protein localization to microtubule cytoskeleton	8/660	48/12764	0.0029471	0.0477997	0.0442065	6491/6790/7272/10615/11190/23636/64770/81610	8
MESO	GO:0006284	base-excision repair	7/660	38/12764	0.00297091	0.0480012	0.0443928	1763/2237/3978/5111/5424/5426/10721	7
PAAD	GO:0030216	keratinocyte differentiation	65/3582	99/9524	1.24436e-08	5.95148e-05	5.73056e-05	182/301/823/1001/1041/1515/1824/1825/1829/1830/1969/2069/2125/2296/2317/2810/3664/3728/3851/3852/3853/3854/3855/3856/3857/3860/3861/3866/3868/3872/3875/3880/4488/4831/5046/5080/5266/5317/5318/5652/5920/6431/6698/6699/6707/6768/7053/8626/8754/8796/9333/10626/11187/23086/25818/60485/64065/79977/135228/144501/204219/286887/338785/387264/439915	65
PAAD	GO:0009913	epidermal cell differentiation	78/3582	129/9524	1.00013e-07	9.75931e-05	9.39705e-05	182/301/652/823/1001/1041/1515/1824/1825/1829/1830/1969/2069/2125/2146/2296/2317/2810/3280/3664/3728/3851/3852/3853/3854/3855/3856/3857/3860/3861/3866/3868/3872/3875/3880/4488/4831/5017/5046/5048/5080/5266/5317/5318/5652/5920/6431/6698/6699/6707/6768/6820/7053/7399/8626/8754/8796/9333/10626/11187/23086/23764/25818/25861/54845/55283/60485/64065/79152/79977/135228/144501/161497/204219/286887/338785…	78
PAAD	GO:0034329	cell junction assembly	121/3582	230/9524	2.03282e-06	0.00123977	0.00119375	81/183/287/382/402/421/577/627/857/928/977/999/1001/1008/1010/1141/1308/1636/1813/1826/1894/1969/1981/2048/2239/2554/2562/2706/3084/3556/3655/3673/3691/3728/3852/3861/3909/3914/3918/4131/4897/5317/5318/5339/5566/5584/5789/5796/5802/6281/6385/6422/6495/6585/6622/6624/6904/7122/7205/7408/7481/8292/8927/9076/9344/9378/9746/9863/10207/10266/11170/11187/22859/22943/22998/23114/23122/23136/23396/23767/…	121
PAAD	GO:0086012	membrane depolarization during cardiac muscle cell action potential	14/3582	16/9524	5.65861e-05	0.0216209	0.0208183	287/477/610/775/776/783/3759/6324/6331/6546/10021/29098/54795/55800	14
PAAD	GO:0007268	chemical synaptic transmission	190/3582	408/9524	9.78456e-05	0.0260377	0.0250712	18/29/107/135/136/177/183/273/320/477/627/766/773/774/776/783/785/794/816/991/999/1133/1137/1141/1728/1740/1742/1759/1813/1837/1949/1956/2048/2257/2259/2534/2554/2562/2648/2770/2852/2891/2897/2898/2901/2905/2911/2914/3060/3269/3359/3706/3745/3749/3777/3798/4131/4137/4155/4311/4355/4359/4857/4900/4909/5048/5071/5270/5332/5335/5413/5530/5532/5566/5575/5577/5581/5743/5799/5802/5864/6285/6509/6532/65…	190
PAAD	GO:0098916	anterograde trans-synaptic signaling	190/3582	408/9524	9.78456e-05	0.0260377	0.0250712	18/29/107/135/136/177/183/273/320/477/627/766/773/774/776/783/785/794/816/991/999/1133/1137/1141/1728/1740/1742/1759/1813/1837/1949/1956/2048/2257/2259/2534/2554/2562/2648/2770/2852/2891/2897/2898/2901/2905/2911/2914/3060/3269/3359/3706/3745/3749/3777/3798/4131/4137/4155/4311/4355/4359/4857/4900/4909/5048/5071/5270/5332/5335/5413/5530/5532/5566/5575/5577/5581/5743/5799/5802/5864/6285/6509/6532/65…	190
PAAD	GO:0045216	cell-cell junction organization	57/3582	102/9524	0.000125347	0.0269704	0.0259693	81/118/183/287/382/402/421/857/928/999/1001/1008/1010/1636/1829/1894/1969/2150/2706/3728/5317/5318/5566/5584/6624/6904/7122/7481/9076/9922/10207/10266/11187/23114/23136/23396/23705/25861/51599/54549/55765/56288/57502/57555/64065/79977/79983/81607/83605/84612/85302/92140/144100/201163/221935/222256/261734	57
PAAD	GO:0086010	membrane depolarization during action potential	20/3582	27/9524	0.000127141	0.0269704	0.0259693	287/477/610/775/776/783/3757/3759/6324/6326/6328/6331/6334/6546/8912/10021/11280/29098/54795/55800	20
PAAD	GO:0007043	cell-cell junction assembly	41/3582	69/9524	0.000184801	0.0375686	0.0361741	81/183/287/402/421/857/928/999/1001/1008/1010/1636/1894/1969/2706/3728/5317/5318/5566/5584/6624/6904/7122/7481/9076/10207/10266/11187/23114/23136/23396/51599/56288/79977/79983/84612/85302/92140/201163/222256/261734	41
PCPG	GO:0007268	chemical synaptic transmission	11/52	461/10821	9.22744e-06	0.00434287	0.00428351	2566/4914/5179/5579/6530/6809/8618/9127/22854/22999/66004	11
PCPG	GO:0098916	anterograde trans-synaptic signaling	11/52	461/10821	9.22744e-06	0.00434287	0.00428351	2566/4914/5179/5579/6530/6809/8618/9127/22854/22999/66004	11
PRAD	GO:0000280	nuclear division	103/1735	344/13102	1.78134e-16	9.61035e-13	9.47675e-13	332/699/701/891/898/990/991/994/995/1062/1063/1111/1164/1908/1950/2175/2177/3832/3833/4085/4288/4439/4605/4751/5347/5888/5902/6790/7040/7153/7272/7517/8438/8877/9055/9088/9134/9212/9232/9319/9493/9555/9700/9735/9787/9928/10051/10270/10388/10403/10459/10460/10592/10615/10734/11004/11044/11065/11130/11200/22974/23363/23397/24137/25788/25970/26013/26993/27085/27338/29127/29781/29893/49856/51203/5154…	103
PRAD	GO:0048285	organelle fission	106/1735	380/13102	1.33475e-14	3.60048e-11	3.55043e-11	332/699/701/891/898/990/991/994/995/1062/1063/1111/1164/1908/1950/2175/2177/3832/3833/4085/4288/4439/4605/4751/5347/5888/5902/6790/7040/7153/7272/7517/8438/8877/9055/9088/9134/9212/9232/9319/9493/9555/9700/9735/9787/9928/10051/10270/10388/10403/10459/10460/10592/10615/10734/10891/11004/11044/11065/11130/11200/22974/23363/23397/24137/25788/25970/26013/26993/27085/27338/29127/29781/29893/49856/5120…	106
PRAD	GO:0006260	DNA replication	71/1735	242/13102	2.70513e-11	1.82427e-08	1.79891e-08	641/672/890/898/983/990/1111/1763/1854/1877/2237/3978/4171/4172/4176/4673/4678/4774/4796/4998/5424/5428/5883/5888/5982/5984/5985/6119/6241/7270/7884/8317/8318/9134/9156/9401/9768/9837/9984/10036/10189/10432/10535/10714/10721/11169/11200/11232/23594/29803/29980/51514/51750/55388/63922/64785/79075/79733/80119/80174/81620/84289/84296/90381/92675/116028/144455/146956/197342/222229/253980	71
PRAD	GO:0006281	DNA repair	115/1735	479/13102	5.45648e-11	2.94377e-08	2.90285e-08	641/672/983/1032/1111/1763/2070/2138/2175/2176/2177/2237/2305/2521/2968/3150/3978/4157/4171/4172/4176/4221/4331/4439/4521/4796/4798/5379/5387/5424/5428/5437/5531/5883/5888/5982/5984/5985/6119/6421/7311/7374/7468/7517/7979/8317/8318/8438/8607/9025/9112/9156/9232/9319/9401/9656/9768/10036/10038/10273/10432/10459/10535/10714/10721/11044/11169/11200/11232/22897/25788/25988/27434/29089/29128/51149/515…	115
PRAD	GO:0006261	DNA-dependent DNA replication	47/1735	140/13102	4.80196e-10	2.15888e-07	2.12887e-07	641/898/990/1763/2237/3978/4171/4172/4176/4796/4998/5424/5428/5888/5982/5984/5985/6119/7884/8317/8318/9134/9401/9837/9984/10189/10714/10721/11169/11200/11232/23594/29980/51750/55388/63922/64785/79075/79733/80174/81620/84296/90381/144455/146956/197342/222229	47
PRAD	GO:0008380	RNA splicing	96/1735	390/13102	5.447e-10	2.2605e-07	2.22908e-07	1195/1196/1207/1479/2521/3178/3181/3184/3187/4116/4670/4904/5411/5437/5546/5935/6421/6427/6430/6433/6625/6627/6633/6635/6636/7072/7536/8106/8227/8233/8241/8449/8487/8683/9092/9129/9406/9584/9984/10084/10147/10150/10189/10212/10421/10465/10521/10891/10921/10922/10949/11129/11338/22889/22913/22927/22985/25766/25804/26121/26528/26993/27258/29894/51428/51503/51585/51593/51631/51639/51690/51691/51692/…	96
PRAD	GO:0000377	RNA splicing, via transesterification reactions with bulged adenosine as nucleophile	78/1735	309/13102	7.04388e-09	2.53345e-06	2.49823e-06	1207/1479/2521/3178/3181/3184/3187/4116/4670/4904/5411/5437/5546/5935/6421/6427/6430/6433/6625/6627/6633/6635/6636/7072/7536/8106/8233/8241/8449/8487/8683/9092/9129/10084/10150/10189/10212/10421/10465/10521/10921/10949/11338/22889/22913/25766/25804/26121/26528/27258/29894/51428/51503/51585/51593/51631/51639/51690/51691/51692/51747/54715/54883/54960/55015/55110/55599/55692/57461/57794/58509/60625/…	78
PRAD	GO:0000398	mRNA splicing, via spliceosome	78/1735	309/13102	7.04388e-09	2.53345e-06	2.49823e-06	1207/1479/2521/3178/3181/3184/3187/4116/4670/4904/5411/5437/5546/5935/6421/6427/6430/6433/6625/6627/6633/6635/6636/7072/7536/8106/8233/8241/8449/8487/8683/9092/9129/10084/10150/10189/10212/10421/10465/10521/10921/10949/11338/22889/22913/25766/25804/26121/26528/27258/29894/51428/51503/51585/51593/51631/51639/51690/51691/51692/51747/54715/54883/54960/55015/55110/55599/55692/57461/57794/58509/60625/…	78
PRAD	GO:0000375	RNA splicing, via transesterification reactions	78/1735	312/13102	1.11574e-08	3.76212e-06	3.70982e-06	1207/1479/2521/3178/3181/3184/3187/4116/4670/4904/5411/5437/5546/5935/6421/6427/6430/6433/6625/6627/6633/6635/6636/7072/7536/8106/8233/8241/8449/8487/8683/9092/9129/10084/10150/10189/10212/10421/10465/10521/10921/10949/11338/22889/22913/25766/25804/26121/26528/27258/29894/51428/51503/51585/51593/51631/51639/51690/51691/51692/51747/54715/54883/54960/55015/55110/55599/55692/57461/57794/58509/60625/…	78
PRAD	GO:0006397	mRNA processing	103/1735	457/13102	2.11447e-08	6.33752e-06	6.24942e-06	891/1207/1479/2521/2968/3178/3181/3184/3187/4116/4331/4670/4904/5411/5437/5546/5935/6294/6421/6427/6430/6433/6625/6627/6633/6635/6636/7072/7536/7884/8106/8227/8233/8241/8449/8487/8683/9092/9129/9406/9584/9924/9984/10084/10147/10150/10189/10212/10421/10465/10521/10891/10921/10949/11044/11129/11338/22889/22913/22927/22985/25766/25804/26097/26121/26528/26993/26995/27258/29894/51428/51503/51585/51593…	103
PRAD	GO:0006310	DNA recombination	61/1735	237/13102	1.46902e-07	3.60244e-05	3.55236e-05	641/672/1111/2237/2521/3149/3838/4171/4172/4176/4439/4796/4798/5531/5888/6119/6421/6778/6832/6929/7040/7153/7374/7468/7517/7979/8317/8318/8438/8607/8971/9025/9156/9319/9401/9984/10189/10432/10459/10721/25788/27434/29893/51149/51750/54780/55010/64110/79000/79008/79035/79913/80119/80198/83933/84057/84296/116028/146956/197342/283899	61
PRAD	GO:0051783	regulation of nuclear division	46/1735	164/13102	3.59898e-07	7.46789e-05	7.36407e-05	699/701/891/990/991/995/1062/1063/1111/1908/1950/3832/4085/4288/4751/5347/5902/6790/7040/7272/7517/8877/9088/9212/9232/9319/9555/9700/9735/9787/10403/10459/10460/11065/23363/25970/26013/27085/51203/54443/54908/81620/84687/113130/225689/286151	46
PRAD	GO:0071103	DNA conformation change	69/1735	287/13102	3.86427e-07	7.72138e-05	7.61403e-05	641/891/983/1058/1677/1763/1786/2968/3070/3149/3181/4171/4172/4176/4331/4673/4676/4678/5888/5982/5984/5985/6832/7153/7311/8318/8358/8438/8607/8940/8971/9025/9401/9555/9837/10036/10051/10270/10541/10592/10721/11044/11339/22985/23397/25788/26993/29781/51203/51750/54069/54821/54892/55355/55723/63922/64105/64151/64946/79075/79682/79829/79913/80119/80152/84296/113130/401541/440081	69
PRAD	GO:0051383	kinetochore organization	12/1735	19/13102	5.73675e-07	0.000106723	0.00010524	1058/1062/1063/10051/10403/10592/51112/64105/64946/80152/81620/83540	12
PRAD	GO:0030261	chromosome condensation	17/1735	37/13102	1.25909e-06	0.000205841	0.00020298	891/983/1677/7153/8971/10051/10270/10592/11044/22985/23397/26993/29781/51203/54892/64151/113130	17
PRAD	GO:0006302	double-strand break repair	53/1735	210/13102	1.81341e-06	0.00027176	0.000267982	641/672/1111/1763/2138/2237/2305/2521/4171/4172/4176/4796/5531/5888/6119/6421/7468/7517/7979/8317/8318/8438/9025/9112/9319/9401/9656/10038/10459/10721/11044/11200/25788/27434/51149/51720/51750/54840/55010/55100/55775/64110/79000/79008/79035/79913/80198/84296/84501/113130/116028/146956/197342	53
PRAD	GO:0000079	regulation of cyclin-dependent protein serine/threonine kinase activity	28/1735	85/13102	2.33347e-06	0.000331292	0.000326686	641/890/891/898/899/990/995/1019/1031/1032/1033/1163/1164/4221/4331/5347/5728/9088/9133/9134/11140/51654/57018/80279/81669/84722/93649/245711	28
PRAD	GO:1902099	regulation of metaphase/anaphase transition of cell cycle	20/1735	51/13102	3.16434e-06	0.000416381	0.000410592	699/701/891/990/991/1062/1063/4085/5347/7272/7517/9212/9319/9700/9787/10403/10459/54908/81620/225689	20
PRAD	GO:0010965	regulation of mitotic sister chromatid separation	21/1735	56/13102	4.20269e-06	0.000527292	0.000519961	699/701/891/990/991/1062/1063/4085/5347/7272/7517/9212/9232/9319/9700/9787/10403/10459/10460/54908/81620	21
PRAD	GO:0007091	metaphase/anaphase transition of mitotic cell cycle	20/1735	53/13102	6.34334e-06	0.000760496	0.000749923	699/701/891/990/991/1062/1063/4085/5347/7272/7517/9212/9319/9700/9787/10403/10459/10460/54908/81620	20
PRAD	GO:0030071	regulation of mitotic metaphase/anaphase transition	19/1735	50/13102	9.56893e-06	0.0010682	0.00105335	699/701/891/990/991/1062/1063/4085/5347/7272/7517/9212/9319/9700/9787/10403/10459/54908/81620	19
PRAD	GO:0007094	mitotic spindle assembly checkpoint	15/1735	34/13102	9.89991e-06	0.0010682	0.00105335	699/701/891/991/1063/4085/5347/7272/7517/9212/9319/10403/10459/54908/81620	15
PRAD	GO:2000816	negative regulation of mitotic sister chromatid separation	16/1735	39/13102	1.55161e-05	0.00152199	0.00150083	699/701/891/991/1063/4085/5347/7272/7517/9212/9232/9319/10403/10459/54908/81620	16
PRAD	GO:0071459	protein localization to chromosome, centromeric region	11/1735	21/13102	2.09328e-05	0.00198127	0.00195373	983/1058/7272/9212/10403/27085/51112/54908/81620/83903/91272	11
PRAD	GO:0045841	negative regulation of mitotic metaphase/anaphase transition	15/1735	36/13102	2.29025e-05	0.00199289	0.00196518	699/701/891/991/1063/4085/5347/7272/7517/9212/9319/10403/10459/54908/81620	15
PRAD	GO:1902100	negative regulation of metaphase/anaphase transition of cell cycle	15/1735	36/13102	2.29025e-05	0.00199289	0.00196518	699/701/891/991/1063/4085/5347/7272/7517/9212/9319/10403/10459/54908/81620	15
PRAD	GO:0000724	double-strand break repair via homologous recombination	32/1735	115/13102	2.48946e-05	0.00209854	0.00206936	641/672/1111/2237/2521/4171/4172/4176/4796/5531/5888/6119/6421/7517/7979/8317/8318/8438/9401/10459/10721/25788/51149/51750/55010/64110/79000/79008/79035/80198/84296/116028	32
PRAD	GO:0033047	regulation of mitotic sister chromatid segregation	22/1735	67/13102	2.92338e-05	0.00235397	0.00232125	699/701/891/990/991/1062/1063/4085/5347/7272/7517/9212/9232/9319/9555/9700/9787/10403/10459/10460/54908/81620	22
PRAD	GO:0000725	recombinational repair	32/1735	116/13102	3.00793e-05	0.00238644	0.00235326	641/672/1111/2237/2521/4171/4172/4176/4796/5531/5888/6119/6421/7517/7979/8317/8318/8438/9401/10459/10721/25788/51149/51750/55010/64110/79000/79008/79035/80198/84296/116028	32
PRAD	GO:1901990	regulation of mitotic cell cycle phase transition	77/1735	372/13102	3.39366e-05	0.00265345	0.00261656	199/641/672/699/701/891/898/983/990/991/994/995/1019/1031/1032/1062/1063/1869/2146/3161/3276/4085/4194/4751/4957/4998/5347/5688/5715/5728/6790/7040/7272/7480/7517/8317/8318/9212/9319/9700/9735/9787/9814/9928/10403/10459/10498/10733/11065/11170/11200/22897/22974/22994/23354/27085/29882/29980/51149/51512/51514/54443/54908/55367/57060/79027/79733/79858/80174/80279/81620/84446/84687/90381/93323/11313…	77
PRAD	GO:0032392	DNA geometric change	31/1735	113/13102	4.47238e-05	0.00339838	0.00335113	641/1763/2968/3149/3181/4171/4172/4176/4331/5888/5982/5984/5985/6832/7153/7311/8318/8438/8607/9401/9837/10721/25788/51750/54821/63922/79075/79913/80119/84296/440081	31
PRAD	GO:0033048	negative regulation of mitotic sister chromatid segregation	16/1735	42/13102	4.63508e-05	0.00347309	0.00342481	699/701/891/991/1063/4085/5347/7272/7517/9212/9232/9319/10403/10459/54908/81620	16
PRAD	GO:0006271	DNA strand elongation involved in DNA replication	9/1735	16/13102	5.83382e-05	0.00431143	0.0042515	1763/3978/4172/4176/5984/9837/10714/64785/84296	9
PRAD	GO:0051784	negative regulation of nuclear division	19/1735	56/13102	6.07844e-05	0.00431489	0.00425491	699/701/891/991/1063/1111/4085/5347/7272/7517/9212/9232/9319/10403/10459/27085/54908/81620/286151	19
PRAD	GO:0033044	regulation of chromosome organization	65/1735	307/13102	6.73395e-05	0.00465765	0.0045929	672/699/701/891/990/991/1062/1063/1111/1786/1789/2237/2624/2648/3178/3181/3184/4085/4171/4288/4331/4751/5347/6421/6688/7040/7153/7272/7517/8318/8473/8726/8971/8986/9212/9232/9319/9555/9700/9757/9787/10270/10403/10459/10460/10891/26097/26993/51112/51750/54908/55100/55201/63925/79008/79035/79829/80119/81620/93649/94104/113130/116028/201163/225689	65
PRAD	GO:0034501	protein localization to kinetochore	9/1735	17/13102	0.000109402	0.00711115	0.00701229	983/7272/9212/10403/27085/51112/54908/81620/83903	9
PRAD	GO:0044773	mitotic DNA damage checkpoint	25/1735	88/13102	0.000129216	0.00829908	0.00818371	641/891/983/995/1869/3276/4194/5883/6790/9656/10498/11200/29980/51149/51512/55367/57060/79733/79858/80198/80279/84446/144455/146956/197342	25
PRAD	GO:0000727	double-strand break repair via break-induced replication	7/1735	11/13102	0.000142967	0.00896866	0.00884398	4171/4172/4176/8317/8318/80198/84296	7
PRAD	GO:0006270	DNA replication initiation	13/1735	33/13102	0.000159707	0.00990368	0.009766	898/990/4171/4172/4176/4998/8318/9134/23594/55388/81620/90381/222229	13
PRAD	GO:1901991	negative regulation of mitotic cell cycle phase transition	46/1735	205/13102	0.000189337	0.0116076	0.0114463	641/672/699/701/891/983/990/991/995/1019/1031/1032/1063/1869/2146/3276/4085/4194/4998/5347/5688/5715/5728/6790/7272/7517/9212/9319/10403/10459/10498/11170/11200/29980/51149/51512/54908/55367/57060/79027/79733/80279/81620/84446/90381/144455	46
PRAD	GO:0032508	DNA duplex unwinding	28/1735	106/13102	0.000207681	0.0124493	0.0122762	641/1763/2968/4171/4172/4176/4331/5888/5982/5984/5985/6832/7153/7311/8318/8607/9401/9837/10721/25788/51750/54821/63922/79075/79913/80119/84296/440081	28
PRAD	GO:0006323	DNA packaging	40/1735	174/13102	0.000285088	0.0169016	0.0166667	891/983/1058/1677/1786/3070/4171/4673/4676/4678/7153/8358/8607/8971/9025/9555/10036/10051/10270/10541/10592/11044/11339/22985/23397/26993/29781/51203/54069/54892/55355/55723/64105/64151/64946/79682/79829/80152/113130/401541	40
PRAD	GO:0034508	centromere complex assembly	15/1735	45/13102	0.000442646	0.0246519	0.0243092	1058/1062/1063/3070/4678/8607/11339/51112/54069/55355/64105/64946/79682/80152/401541	15
PRAD	GO:0000082	G1/S transition of mitotic cell cycle	46/1735	214/13102	0.000523855	0.0280115	0.0276221	199/891/898/983/990/995/1018/1019/1031/1032/1033/1869/2146/3276/4171/4172/4176/4194/4331/4678/4998/5728/6119/6241/6790/7298/8317/8318/9134/9928/10498/11170/11200/23594/25988/27085/51512/55367/55388/57060/79027/79733/81620/128239/144455/245711	46
PRAD	GO:0031572	G2 DNA damage checkpoint	11/1735	28/13102	0.000524404	0.0280115	0.0276221	641/672/983/1111/5347/29980/51149/51514/51720/80279/84446	11
PRAD	GO:1901992	positive regulation of mitotic cell cycle phase transition	20/1735	70/13102	0.000544476	0.0287985	0.0283982	199/891/898/983/990/994/995/1019/7040/7480/8317/8318/9700/9787/11065/27085/51514/80174/81620/113130	20
PRAD	GO:0031573	intra-S DNA damage checkpoint	7/1735	13/13102	0.000583088	0.0305414	0.0301168	5883/9656/11200/79858/80198/146956/197342	7
PRAD	GO:0071897	DNA biosynthetic process	37/1735	163/13102	0.00061128	0.0317101	0.0312693	409/1032/1063/3178/3181/3184/3978/4221/4751/4931/5424/5428/5982/5984/5985/6119/7083/7298/7311/8877/9212/9768/9894/10459/10714/10721/11232/25849/25970/27434/51514/54433/55651/63922/79075/80119/225689	37
PRAD	GO:0043486	histone exchange	14/1735	43/13102	0.000888862	0.0448169	0.0441939	1058/4678/5757/8607/9025/11339/54069/55355/55929/64105/64946/79682/80152/401541	14
PRAD	GO:0072422	signal transduction involved in DNA damage checkpoint	19/1735	68/13102	0.00100044	0.0495173	0.0488289	672/891/983/995/1111/1869/3276/4194/5347/6790/10498/11200/51512/51514/51720/55367/57060/79733/144455	19
STAD	GO:0061041	regulation of wound healing	1/1	115/13033	0.00882376	0.024273		7035	1
STAD	GO:0071222	cellular response to lipopolysaccharide	1/1	147/13033	0.0112791	0.024273		7035	1
STAD	GO:0071347	cellular response to interleukin-1	1/1	148/13033	0.0113558	0.024273		7035	1
STAD	GO:0010951	negative regulation of endopeptidase activity	1/1	163/13033	0.0125067	0.024273		7035	1
STAD	GO:0070555	response to interleukin-1	1/1	168/13033	0.0128904	0.024273		7035	1
STAD	GO:0010466	negative regulation of peptidase activity	1/1	171/13033	0.0131205	0.024273		7035	1
STAD	GO:0071383	cellular response to steroid hormone stimulus	1/1	195/13033	0.014962	0.0263617		7035	1
STAD	GO:0045861	negative regulation of proteolysis	1/1	251/13033	0.0192588	0.0283895		7035	1
STAD	GO:0052548	regulation of endopeptidase activity	1/1	304/13033	0.0233254	0.028768		7035	1
STAD	GO:0052547	regulation of peptidase activity	1/1	328/13033	0.0251669	0.0295428		7035	1
STAD	GO:0051346	negative regulation of hydrolase activity	1/1	333/13033	0.0255505	0.0295428		7035	1
STAD	GO:0071396	cellular response to lipid	1/1	466/13033	0.0357554	0.0359856		7035	1
STAD	GO:0071407	cellular response to organic cyclic compound	1/1	469/13033	0.0359856	0.0359856		7035	1
THCA	GO:0071340	skeletal muscle acetylcholine-gated channel clustering	1/2	10/12239	0.00163352	0.0305391	0.00714365	8326	1
THCA	GO:1901626	regulation of postsynaptic membrane organization	1/2	11/12239	0.0017968	0.0305391	0.00714365	8326	1
THCA	GO:0060546	negative regulation of necroptotic process	1/2	12/12239	0.00196006	0.0305391	0.00714365	8326	1
THCA	GO:0062099	negative regulation of programmed necrotic cell death	1/2	12/12239	0.00196006	0.0305391	0.00714365	8326	1
THCA	GO:0060544	regulation of necroptotic process	1/2	15/12239	0.00244978	0.0305391	0.00714365	8326	1
THCA	GO:0062098	regulation of programmed necrotic cell death	1/2	15/12239	0.00244978	0.0305391	0.00714365	8326	1
THCA	GO:0051882	mitochondrial depolarization	1/2	18/12239	0.00293937	0.0305391	0.00714365	8326	1
THCA	GO:0070266	necroptotic process	1/2	29/12239	0.00473353	0.0305391	0.00714365	8326	1
THCA	GO:0001941	postsynaptic membrane organization	1/2	32/12239	0.00522256	0.0305391	0.00714365	8326	1
THCA	GO:0007528	neuromuscular junction development	1/2	37/12239	0.00603735	0.0305391	0.00714365	8326	1
THCA	GO:0010823	negative regulation of mitochondrion organization	1/2	40/12239	0.00652607	0.0305391	0.00714365	8326	1
THCA	GO:1902110	positive regulation of mitochondrial membrane permeability involved in apoptotic process	1/2	50/12239	0.00815424	0.0305391	0.00714365	8326	1
THCA	GO:1902108	regulation of mitochondrial membrane permeability involved in apoptotic process	1/2	53/12239	0.00864244	0.0305391	0.00714365	8326	1
THCA	GO:0035794	positive regulation of mitochondrial membrane permeability	1/2	54/12239	0.00880514	0.0305391	0.00714365	8326	1
THCA	GO:0099175	regulation of postsynapse organization	1/2	73/12239	0.011894	0.0330241	0.00772494	8326	1
THCA	GO:0035335	peptidyl-tyrosine dephosphorylation	1/2	87/12239	0.0141669	0.036203	0.00846854	64419	1
THCA	GO:0030183	B cell differentiation	1/2	96/12239	0.0156267	0.0378646	0.00885722	8326	1
THCA	GO:0006661	phosphatidylinositol biosynthetic process	1/2	99/12239	0.016113	0.0379753	0.0088831	64419	1
THCA	GO:0008637	apoptotic mitochondrial changes	1/2	100/12239	0.0162751	0.0379753	0.0088831	8326	1
THCA	GO:0043524	negative regulation of neuron apoptotic process	1/2	104/12239	0.0169233	0.0385241	0.00901149	8326	1
THCA	GO:0007006	mitochondrial membrane organization	1/2	109/12239	0.0177333	0.0385241	0.00901149	8326	1
THCA	GO:0090263	positive regulation of canonical Wnt signaling pathway	1/2	121/12239	0.0196759	0.0406421	0.00950691	8326	1
THCA	GO:0035567	non-canonical Wnt signaling pathway	1/2	127/12239	0.0206465	0.041959	0.00981497	8326	1
THCA	GO:0046488	phosphatidylinositol metabolic process	1/2	146/12239	0.0237168	0.0447242	0.0104618	64419	1
THCA	GO:0010821	regulation of mitochondrion organization	1/2	151/12239	0.024524	0.0447242	0.0104618	8326	1
THCA	GO:1905475	regulation of protein localization to membrane	1/2	152/12239	0.0246854	0.0447242	0.0104618	8326	1
THCA	GO:0043523	regulation of neuron apoptotic process	1/2	153/12239	0.0248468	0.0447242	0.0104618	8326	1
THCA	GO:0046474	glycerophospholipid biosynthetic process	1/2	176/12239	0.0285549	0.048834	0.0114232	64419	1
UVM	GO:0042775	mitochondrial ATP synthesis coupled electron transport	57/4961	81/12597	1.46163e-08	2.09269e-05	1.87204e-05	637/891/983/1329/1337/1339/1340/1345/1349/1352/1537/1738/4694/4695/4696/4697/4698/4700/4701/4702/4704/4706/4707/4708/4709/4710/4712/4713/4714/4715/4716/4717/4719/4720/4722/4724/4726/4729/4731/6389/6391/7381/7386/9377/10975/11315/23479/27089/29796/51079/51103/54205/54949/55967/57017/84701/126328	57
UVM	GO:0006120	mitochondrial electron transport, NADH to ubiquinone	35/4961	45/12597	1.6914e-07	0.000138381	0.00012379	1738/4694/4695/4696/4697/4698/4700/4701/4702/4704/4706/4707/4708/4709/4710/4712/4713/4714/4715/4716/4717/4719/4720/4722/4724/4726/4729/4731/11315/23479/51079/51103/55967/57017/126328	35
UVM	GO:1902036	regulation of hematopoietic stem cell differentiation	43/4961	63/12597	3.18635e-06	0.00107343	0.000960246	25/861/865/2296/2624/2625/3313/4005/4602/4780/5610/5682/5683/5684/5685/5687/5688/5691/5692/5693/5694/5700/5701/5702/5704/5705/5706/5707/5709/5710/5711/5713/5714/5717/5718/5721/6938/10197/10213/10443/23198/54517/83737	43
UVM	GO:0001936	regulation of endothelial cell proliferation	61/4961	98/12597	3.71183e-06	0.00118098	0.00105646	94/187/283/348/405/498/650/659/1012/1893/1960/2260/2277/2324/2624/2697/3146/3148/3162/3357/3676/3690/3791/4192/4763/5228/5335/5468/5578/5587/5797/6387/6678/6772/6774/6868/7010/7026/7057/7124/7422/7424/7857/8291/8742/8829/8854/8862/9037/9255/10016/22846/51157/54567/55109/55333/56005/57608/79031/93974/441478	61
UVM	GO:0031145	anaphase-promoting complex-dependent catabolic process	48/4961	74/12597	7.83038e-06	0.00236024	0.00211138	701/891/983/996/1017/5347/5682/5683/5684/5685/5687/5688/5691/5692/5693/5694/5700/5701/5702/5704/5705/5706/5707/5709/5710/5711/5713/5714/5717/5718/5721/6790/7311/7316/8452/8697/9184/9232/10197/10213/10393/11065/23198/27338/29945/51434/84417/246184	48
UVM	GO:0019722	calcium-mediated signaling	92/4961	164/12597	9.73485e-06	0.00253533	0.00226801	287/481/488/576/683/801/805/845/1012/1193/1233/1238/1827/1906/1910/2065/2280/2494/2633/2826/2833/2903/2906/2946/3270/3357/3479/3576/3791/4137/4776/4935/5025/5026/5027/5031/5164/5311/5335/5350/5530/5533/5534/5562/5621/5737/5788/5795/6351/6444/6546/6717/6818/6850/7124/7137/7226/7462/7852/8445/8877/9001/9034/9446/9451/9455/9759/10269/10519/10645/10725/11123/11163/22859/27040/29995/50852/51196/51643/…	92
UVM	GO:0002479	antigen processing and presentation of exogenous peptide antigen via MHC class I, TAP-dependent	42/4961	63/12597	1.04038e-05	0.00253533	0.00226801	567/811/1147/2210/2923/3105/3106/3107/3133/3134/3136/4689/5682/5683/5684/5685/5687/5688/5691/5692/5693/5694/5700/5701/5702/5704/5705/5706/5707/5709/5710/5711/5713/5714/5717/5718/5721/6890/9554/10197/10213/23198	42
UVM	GO:0042590	antigen processing and presentation of exogenous peptide antigen via MHC class I	43/4961	65/12597	1.10254e-05	0.00253533	0.00226801	567/811/1147/2210/2923/3105/3106/3107/3133/3134/3136/4689/5682/5683/5684/5685/5687/5688/5691/5692/5693/5694/5700/5701/5702/5704/5705/5706/5707/5709/5710/5711/5713/5714/5717/5718/5721/6890/9554/10197/10213/23198/50856	43
UVM	GO:0033108	mitochondrial respiratory chain complex assembly	52/4961	83/12597	1.45872e-05	0.00282806	0.00252988	617/4694/4695/4696/4698/4700/4701/4702/4704/4706/4707/4708/4709/4710/4712/4713/4714/4715/4716/4717/4719/4720/4722/4724/4726/4729/4731/6341/7381/9997/29090/29796/51079/51103/51241/51287/51295/54949/55245/55572/55744/55967/79072/79133/84300/84987/116228/126328/137682/284184/285521/493753	52
UVM	GO:0034035	purine ribonucleoside bisphosphate metabolic process	16/4961	18/12597	2.00643e-05	0.00348206	0.00311492	1836/5167/6799/6817/6818/6820/8459/8460/9060/10380/10861/25830/27233/51000/54928/84836	16
UVM	GO:0010257	NADH dehydrogenase complex assembly	38/4961	57/12597	2.73273e-05	0.00402211	0.00359802	617/4694/4695/4696/4698/4700/4701/4702/4704/4706/4707/4708/4709/4710/4712/4713/4714/4715/4716/4717/4719/4720/4722/4724/4726/4729/4731/29090/51079/51103/51295/55572/55744/55967/79133/126328/137682/284184	38
UVM	GO:0032981	mitochondrial respiratory chain complex I assembly	38/4961	57/12597	2.73273e-05	0.00402211	0.00359802	617/4694/4695/4696/4698/4700/4701/4702/4704/4706/4707/4708/4709/4710/4712/4713/4714/4715/4716/4717/4719/4720/4722/4724/4726/4729/4731/29090/51079/51103/51295/55572/55744/55967/79133/126328/137682/284184	38
UVM	GO:1903037	regulation of leukocyte cell-cell adhesion	121/4961	230/12597	2.83172e-05	0.00405431	0.00362683	101/135/199/301/384/445/836/861/865/912/921/923/939/940/942/959/961/972/1051/1326/1604/1947/1948/1960/2213/2319/2625/2736/2737/2885/3077/3113/3133/3146/3280/3383/3479/3481/3485/3553/3569/3594/3600/3606/3620/3654/3659/3676/3902/3932/3956/3958/4067/4192/4602/4860/5074/5133/5465/5621/5781/5788/5879/6188/6352/6387/6693/6850/7037/7070/7124/7494/7784/8379/8546/8654/8767/9093/9231/9308/9314/9402/9655/10…	121
UVM	GO:0006487	protein N-linked glycosylation	45/4961	71/12597	3.56892e-05	0.00462521	0.00413754	432/957/1603/2530/2673/2683/3703/3998/4247/4248/5373/6185/6482/7415/8707/8813/9526/9945/10317/11320/22845/29880/55757/55858/56052/56886/57134/57171/58505/64689/79053/79087/79644/79868/84061/84447/84920/85365/91319/146664/199857/200185/256281/440138/100128731	45
UVM	GO:0060218	hematopoietic stem cell differentiation	46/4961	73/12597	3.63427e-05	0.00462521	0.00413754	25/861/865/1636/2296/2624/2625/3214/3313/4005/4602/4780/5610/5682/5683/5684/5685/5687/5688/5691/5692/5693/5694/5700/5701/5702/5704/5705/5706/5707/5709/5710/5711/5713/5714/5717/5718/5721/6938/7520/10197/10213/10443/23198/54517/83737	46
UVM	GO:0001938	positive regulation of endothelial cell proliferation	45/4961	72/12597	5.90355e-05	0.00650185	0.00581631	94/187/283/405/650/659/1012/1893/1960/2260/2277/2324/2624/3146/3148/3162/3357/3676/3690/3791/4192/4763/5228/5335/5578/5587/6387/6774/6868/7010/7422/7424/7857/8291/8742/8829/8862/9037/10016/51157/55109/56005/57608/79031/441478	45
UVM	GO:0043542	endothelial cell migration	88/4961	162/12597	7.61904e-05	0.00779183	0.00697027	25/94/183/285/301/348/388/498/506/575/659/811/949/1012/1460/1906/1948/1960/2013/2260/2303/2324/2624/2625/3146/3162/3690/3728/3791/3964/4017/4233/4763/4780/4846/4856/5025/5175/5286/5335/5468/5578/5587/5606/5607/5613/5641/5743/5747/5797/6678/6781/6868/7010/7026/7057/7422/7424/7857/8503/8613/8742/8817/8829/9037/9270/9314/10016/10519/10563/11156/22846/22976/25960/51157/54567/55333/55466/56999/57608/6…	88
UVM	GO:0034612	response to tumor necrosis factor	117/4961	227/12597	0.000119678	0.0107093	0.00958015	102/445/678/834/836/841/939/959/965/1147/1393/1432/1660/1906/2021/2309/2625/2629/2633/2634/2643/2678/2679/2852/2937/2950/3373/3383/3576/3604/3717/3767/4055/4780/4790/4792/5105/5594/5682/5683/5684/5685/5687/5688/5691/5692/5693/5694/5700/5701/5702/5704/5705/5706/5707/5709/5710/5711/5713/5714/5717/5718/5721/5743/6188/6351/6352/6772/6850/6868/7057/7124/7132/7133/7186/7187/7293/8491/8692/8741/8742/875…	117
UVM	GO:0010972	negative regulation of G2/M transition of mitotic cell cycle	47/4961	78/12597	0.000148877	0.0121802	0.010896	472/983/990/2273/3364/4683/4998/5682/5683/5684/5685/5687/5688/5691/5692/5693/5694/5700/5701/5702/5704/5705/5706/5707/5709/5710/5711/5713/5714/5717/5718/5721/5885/6790/8454/9978/10197/10213/23194/23198/29980/51149/51347/60561/80279/84446/91603	47
UVM	GO:0061418	regulation of transcription from RNA polymerase II promoter in response to hypoxia	41/4961	67/12597	0.000242391	0.0180283	0.0161274	405/571/768/2033/2034/3516/4780/5682/5683/5684/5685/5687/5688/5691/5692/5693/5694/5700/5701/5702/5704/5705/5706/5707/5709/5710/5711/5713/5714/5717/5718/5721/6921/7311/7316/7422/9978/10197/10213/23198/54583	41
UVM	GO:0019885	antigen processing and presentation of endogenous peptide antigen via MHC class I	11/4961	12/12597	0.000269408	0.0189086	0.0169149	567/3077/3105/3106/3107/3133/3134/3136/3416/6890/64167	11
UVM	GO:0071222	cellular response to lipopolysaccharide	72/4961	132/12597	0.000279453	0.0192823	0.0172492	25/445/824/834/923/942/949/1051/1432/1604/1910/2672/2921/2950/3055/3146/3148/3383/3394/3553/3569/3576/3606/3627/3654/4067/4283/4790/4792/4846/5054/5142/5578/5581/5594/6352/6373/6770/7124/7133/7431/7494/8754/8767/9373/10221/10270/10417/10563/11027/22900/22904/22914/23641/23643/29108/29126/51510/54623/55829/57088/57817/64127/79155/79577/80149/90933/92140/129607/148022/259230/353376	72
UVM	GO:0010389	regulation of G2/M transition of mitotic cell cycle	91/4961	174/12597	0.00034471	0.0232254	0.0207765	351/472/891/983/990/994/1017/1063/1069/1778/1781/2273/3320/3364/4683/4751/4957/4998/5048/5087/5116/5347/5569/5577/5682/5683/5684/5685/5687/5688/5691/5692/5693/5694/5700/5701/5702/5704/5705/5706/5707/5709/5710/5711/5713/5714/5717/5718/5721/5885/5890/6604/6790/7480/7532/7846/8454/8636/8655/8766/9662/9814/9928/9978/10142/10197/10213/10382/10733/22974/23194/23198/25942/29980/51149/51347/51514/54801/5…	91
UVM	GO:0032543	mitochondrial translation	70/4961	129/12597	0.000412118	0.0261751	0.0234152	708/2617/3396/4701/6182/6183/6472/9617/9801/10102/10884/22868/23395/26164/26589/26995/28957/28977/28998/29088/29093/51001/51021/51023/51067/51073/51081/51258/51264/51318/51373/51649/51654/54148/54460/54534/54948/55037/55245/55699/63875/63931/64928/64963/64968/64969/64975/64976/64979/64983/65008/65080/65993/78988/79072/79590/80222/81554/84300/84769/84881/92170/92259/115416/116540/116541/118487/122…	70
UVM	GO:0050863	regulation of T cell activation	123/4961	246/12597	0.000415913	0.0261751	0.0234152	25/101/135/199/301/384/639/836/861/865/912/914/921/923/939/940/942/959/961/972/1051/1326/1499/1604/1947/1948/1960/2213/2319/2625/2736/2737/2885/3077/3111/3113/3133/3146/3280/3479/3481/3485/3553/3569/3594/3600/3606/3620/3659/3902/3932/3956/3958/4067/4192/4602/4860/5074/5133/5621/5781/5788/5879/5880/6188/6352/6647/6654/6693/6850/6935/7037/7070/7133/7494/7784/8379/8546/8654/8767/8784/9093/9231/9308/…	123
UVM	GO:0009117	nucleotide metabolic process	207/4961	439/12597	0.000457707	0.0284923	0.0254881	31/32/47/107/108/109/113/132/136/158/205/351/405/471/498/506/514/518/521/522/539/669/957/1329/1503/1537/1633/1737/1738/1743/1836/1841/2079/2180/2181/2182/2203/2272/2584/2617/2618/2982/2983/3098/3101/3156/3251/3295/3418/3479/3607/3615/3620/3704/4199/4521/4522/4830/4832/4846/4860/4881/4882/4907/4927/4967/4968/5027/5142/5152/5160/5163/5164/5167/5209/5213/5214/5223/5236/5315/5465/5471/5562/5571/5594/…	207
UVM	GO:0043536	positive regulation of blood vessel endothelial cell migration	28/4961	43/12597	0.000559489	0.0326836	0.0292375	25/301/498/506/2260/2303/2624/3146/3162/3791/4780/4846/5025/5286/5335/5578/5587/5606/5743/6868/7057/7422/7424/8817/8829/10519/57608/154810	28
UVM	GO:0097755	positive regulation of blood vessel diameter	28/4961	43/12597	0.000559489	0.0326836	0.0292375	135/136/154/183/348/624/659/1373/1910/2053/2643/2697/2702/2852/2982/3162/3672/3779/4846/5797/6647/6648/8195/8862/8985/9732/59342/143872	28
UVM	GO:0140053	mitochondrial gene expression	81/4961	154/12597	0.000564986	0.0326836	0.0292375	708/2309/2617/3028/3396/4701/5562/6182/6183/6472/6832/9617/9801/10102/10884/22868/23395/26164/26589/26995/28957/28977/28998/29088/29093/51001/51021/51023/51067/51073/51081/51258/51264/51318/51373/51649/51654/54148/54460/54534/54948/55037/55245/55699/56652/57570/60493/63875/63931/64928/64963/64968/64969/64975/64976/64979/64983/65008/65080/65993/78988/79072/79590/79736/80222/80324/81554/84300/84769…	81
UVM	GO:0090026	positive regulation of monocyte chemotaxis	10/4961	11/12597	0.000630725	0.0354133	0.0316794	199/3146/3627/5054/5641/6352/6387/10488/158747/196527	10
UVM	GO:0006415	translational termination	55/4961	99/12597	0.000782003	0.0416228	0.0372342	327/1984/2733/2935/3396/6059/6182/6183/9617/9801/10884/23708/26589/28957/28977/28998/29088/29093/51021/51023/51073/51081/51258/51264/51318/51373/51649/54148/54460/54534/54948/55037/63875/63931/64928/64963/64968/64969/64975/64976/64979/64983/65008/65080/65993/78988/79590/91574/92259/116540/116541/118487/122704/128308/143244	55
UVM	GO:0038093	Fc receptor signaling pathway	83/4961	160/12597	0.00084999	0.043896	0.0392677	25/60/801/919/961/1147/1398/1793/2210/2213/2214/2353/2885/3055/3320/3815/3937/4067/4651/4790/5335/5530/5534/5580/5581/5594/5602/5682/5683/5684/5685/5687/5688/5691/5692/5693/5694/5700/5701/5702/5704/5705/5706/5707/5709/5710/5711/5713/5714/5717/5718/5721/5747/5788/5795/5879/6464/6654/6850/7410/7456/7462/8454/8976/9402/9844/10092/10093/10094/10095/10096/10097/10109/10197/10213/10787/23198/27040/5151…	83
UVM	GO:0030198	extracellular matrix organization	139/4961	286/12597	0.000850787	0.043896	0.0392677	25/101/102/176/183/302/304/351/602/780/824/961/999/1278/1281/1282/1284/1289/1290/1293/1296/1299/1301/1302/1303/1308/1404/1462/1513/1842/2200/2264/2294/2295/2296/2303/2335/2683/2824/3038/3383/3384/3385/3569/3655/3672/3673/3676/3678/3679/3683/3687/3690/3696/3791/3910/3911/3912/3913/3914/3915/3936/4017/4088/4237/4312/4313/4318/4320/4325/4327/4358/4629/4763/4811/5033/5054/5175/5654/5747/6678/6692/669…	139
UVM	GO:1902750	negative regulation of cell cycle G2/M phase transition	50/4961	89/12597	0.000949823	0.0477161	0.042685	472/983/990/2273/3364/4683/4998/5347/5682/5683/5684/5685/5687/5688/5691/5692/5693/5694/5700/5701/5702/5704/5705/5706/5707/5709/5710/5711/5713/5714/5717/5718/5721/5885/6790/8454/9555/9978/10197/10213/23194/23198/29980/51149/51347/51514/60561/80279/84446/91603	50
UVM	GO:0043405	regulation of MAP kinase activity	135/4961	278/12597	0.00104397	0.0490089	0.0438415	101/136/150/151/348/650/959/972/983/1326/1398/1432/1464/1844/1847/1850/1852/1857/1902/1906/1950/2043/2048/2146/2149/2260/2322/2629/2914/2950/3156/3301/3357/3479/3553/3654/3672/3717/3815/3845/4067/4254/4294/4296/4616/4763/4914/5027/5159/5515/5562/5580/5594/5602/5604/5606/5607/5608/5610/5663/5770/5781/5788/5795/5894/6188/6464/6647/6653/6850/7039/7043/7057/7124/7186/7311/7316/7334/7345/7422/7477/778…	135
UVM	GO:0071356	cellular response to tumor necrosis factor	105/4961	210/12597	0.00105778	0.0490089	0.0438415	445/678/834/841/939/959/965/1147/1393/1432/1660/1906/2309/2625/2629/2633/2634/2852/2950/3373/3383/3576/3604/3717/3767/4055/4780/4790/4792/5105/5594/5682/5683/5684/5685/5687/5688/5691/5692/5693/5694/5700/5701/5702/5704/5705/5706/5707/5709/5710/5711/5713/5714/5717/5718/5721/6188/6351/6352/6772/6850/6868/7057/7124/7132/7133/7186/7187/7293/8692/8741/8742/8771/8784/8792/8877/9020/9447/9759/10197/10213…	105
UVM	GO:0070125	mitochondrial translational elongation	47/4961	83/12597	0.00105967	0.0490089	0.0438415	3396/6182/6183/9801/10102/10884/26589/28957/28977/28998/29088/29093/51021/51023/51073/51081/51258/51264/51318/51373/51649/54148/54460/54534/54948/55037/63875/63931/64928/64963/64968/64969/64975/64976/64979/64983/65008/65080/65993/78988/79590/92259/116540/116541/118487/122704/128308	47
UVM	GO:0070972	protein localization to endoplasmic reticulum	68/4961	128/12597	0.00106587	0.0490089	0.0438415	287/439/3309/3921/4736/5373/6122/6134/6136/6137/6138/6141/6142/6146/6152/6156/6157/6158/6159/6161/6165/6168/6176/6181/6187/6188/6191/6193/6203/6204/6205/6206/6207/6222/6223/6224/6230/6235/6726/6727/6728/6729/6731/7311/8733/9045/9218/9349/9697/9789/10890/11014/11015/23471/23480/25782/29082/54557/55176/55973/57142/60559/65992/81854/120892/128866/337867/375056	68
UVM	GO:0035296	regulation of tube diameter	55/4961	100/12597	0.00107825	0.0490089	0.0438415	135/136/150/151/152/154/183/348/490/554/624/659/1373/1636/1889/1906/1909/1910/2053/2149/2296/2303/2643/2697/2702/2852/2982/3156/3162/3274/3357/3383/3672/3741/3779/4846/4881/5028/5286/5743/5797/5910/6546/6647/6648/8195/8862/8985/9270/9732/27345/54795/59342/80852/143872	55
UVM	GO:0043618	regulation of transcription from RNA polymerase II promoter in response to stress	55/4961	100/12597	0.00107825	0.0490089	0.0438415	405/467/571/768/1051/1649/2033/2034/3162/3309/3337/3516/4734/4780/5682/5683/5684/5685/5687/5688/5691/5692/5693/5694/5700/5701/5702/5704/5705/5706/5707/5709/5710/5711/5713/5714/5717/5718/5721/6921/7009/7311/7316/7422/9978/10197/10213/10365/22926/23198/25942/51360/54583/54617/100130086	55
UVM	GO:0097746	regulation of blood vessel diameter	55/4961	100/12597	0.00107825	0.0490089	0.0438415	135/136/150/151/152/154/183/348/490/554/624/659/1373/1636/1889/1906/1909/1910/2053/2149/2296/2303/2643/2697/2702/2852/2982/3156/3162/3274/3357/3383/3672/3741/3779/4846/4881/5028/5286/5743/5797/5910/6546/6647/6648/8195/8862/8985/9270/9732/27345/54795/59342/80852/143872	55
UVM	GO:1901653	cellular response to peptide	141/4961	292/12597	0.00109369	0.0493193	0.0441192	107/108/109/113/154/183/308/351/445/490/528/529/533/760/781/782/815/890/896/990/1020/1373/1385/1393/1394/1398/1906/2043/2058/2200/2213/2303/2309/2549/2740/2805/2844/2852/2865/2885/2887/2888/2950/3383/3416/3479/3481/3553/3625/3676/3717/4067/4131/4141/4193/4218/4780/4790/4825/5105/5164/5167/5286/5315/5447/5468/5471/5562/5575/5577/5580/5591/5621/5641/5663/5747/5770/5781/5786/5791/5908/5919/6464/6599…	141

## Sheet: 2_pathway_logrank test
Cancer	ID	Description	GeneRatio	BgRatio	pvalue	p.adjust	qvalue	geneID	Count
ACC	GO:0071103	DNA conformation change	186/4600	309/14477	2.81604e-25	5.68559e-22	5.16571e-22	10036/10051/10155/10270/1029/10541/1058/10592/10721/10856/11176/113130/11339/116447/126961/130951/142/146059/148479/1616/1642/1653/1660/1663/1677/1763/1786/1788/201254/2068/2071/2074/22880/22907/22985/23063/23064/23198/23310/23347/23378/23397/23523/2491/25/2547/25788/25842/26155/26993/2852/2963/2965/2968/29781/3005/3006/3007/3008/3009/3014/3020/3070/3146/3148/3159/3181/341567/387103/401541/4152/4…	186
ACC	GO:0045047	protein targeting to ER	87/4600	109/14477	4.7476e-25	7.18906e-22	6.5317e-22	10952/11224/130617/23480/23521/25873/28972/29082/29927/3309/3921/439/4736/5373/55176/6122/6124/6125/6128/6129/6130/6132/6134/6135/6136/6137/6138/6139/6141/6142/6143/6146/6147/6154/6155/6156/6157/6158/6159/6160/6161/6164/6165/6167/6168/6169/6171/6175/6176/6181/6187/6188/6189/6191/6193/6194/6201/6202/6203/6204/6205/6206/6207/6209/6210/6217/6218/6222/6223/6224/6227/6229/6230/6232/6233/6235/6726/6728…	87
ACC	GO:0006614	SRP-dependent cotranslational protein targeting to membrane	79/4600	96/14477	1.65099e-24	2e-21	1.81713e-21	10952/11224/130617/23521/25873/29927/3921/4736/55176/6122/6124/6125/6128/6129/6130/6132/6134/6135/6136/6137/6138/6139/6141/6142/6143/6146/6147/6154/6155/6156/6157/6158/6159/6160/6161/6164/6165/6167/6168/6169/6171/6175/6176/6181/6187/6188/6189/6191/6193/6194/6201/6202/6203/6204/6205/6206/6207/6209/6210/6217/6218/6222/6223/6224/6227/6229/6230/6232/6233/6235/6726/6728/6730/6734/6747/7311/9045/9349/9…	79
ACC	GO:0006613	cotranslational protein targeting to membrane	81/4600	100/14477	3.28922e-24	3.32047e-21	3.01685e-21	10952/11224/130617/23521/25873/29927/3921/4736/55176/6122/6124/6125/6128/6129/6130/6132/6134/6135/6136/6137/6138/6139/6141/6142/6143/6146/6147/6154/6155/6156/6157/6158/6159/6160/6161/6164/6165/6167/6168/6169/6171/6175/6176/6181/6187/6188/6189/6191/6193/6194/6201/6202/6203/6204/6205/6206/6207/6209/6210/6217/6218/6222/6223/6224/6227/6229/6230/6232/6233/6235/6726/6728/6730/6734/6746/6747/7095/7311/9…	81
ACC	GO:0072599	establishment of protein localization to endoplasmic reticulum	87/4600	113/14477	4.63271e-23	4.00862e-20	3.64208e-20	10952/11224/130617/23480/23521/25873/28972/29082/29927/3309/3921/439/4736/5373/55176/6122/6124/6125/6128/6129/6130/6132/6134/6135/6136/6137/6138/6139/6141/6142/6143/6146/6147/6154/6155/6156/6157/6158/6159/6160/6161/6164/6165/6167/6168/6169/6171/6175/6176/6181/6187/6188/6189/6191/6193/6194/6201/6202/6203/6204/6205/6206/6207/6209/6210/6217/6218/6222/6223/6224/6227/6229/6230/6232/6233/6235/6726/6728…	87
ACC	GO:0008380	RNA splicing	224/4600	414/14477	1.36234e-21	9.16853e-19	8.33017e-19	100130932/10084/10147/10179/10181/10189/10199/10212/10236/10250/10262/10285/10291/10419/10450/10492/10521/10625/10657/10713/10891/10898/10907/10914/10922/11100/11129/11168/11171/11319/11325/116461/1195/1196/1198/1207/143884/144983/146713/1477/1479/154007/1653/1659/1660/1994/199746/2081/220988/22826/22827/22889/22916/22938/22985/23020/23028/23064/23076/23210/23350/23435/23451/23543/2483/2521/25804…	224
ACC	GO:1901990	regulation of mitotic cell cycle phase transition	217/4600	398/14477	1.68561e-21	9.28156e-19	8.43287e-19	10106/10121/1017/1019/1021/10213/10263/1029/1031/1032/10383/10385/10403/10459/10498/1062/1063/10733/10769/10783/11064/11065/11170/11200/113130/11319/11331/115106/119504/126520/135458/144455/1454/1543/1639/1642/1647/1778/1781/1869/1981/203068/2033/2068/2071/2146/22897/22919/22974/22994/22995/23194/23198/23332/23354/23476/246184/25793/25904/26058/26271/27085/2810/28984/29766/29882/29980/29997/3275/…	217
ACC	GO:0070972	protein localization to endoplasmic reticulum	97/4600	137/14477	5.71739e-21	2.66386e-18	2.42028e-18	10945/10952/11014/11079/11224/130617/23480/23521/25873/28972/2901/29082/29927/3309/337867/375056/3921/439/4736/5373/55176/55973/6122/6124/6125/6128/6129/6130/6132/6134/6135/6136/6137/6138/6139/6141/6142/6143/6146/6147/6154/6155/6156/6157/6158/6159/6160/6161/6164/6165/6167/6168/6169/6171/6175/6176/6181/6187/6188/6189/6191/6193/6194/6201/6202/6203/6204/6205/6206/6207/6209/6210/6217/6218/6222/6223/6…	97
ACC	GO:0006397	mRNA processing	248/4600	478/14477	1.61883e-20	6.53682e-18	5.9391e-18	100130932/10084/10147/10179/10181/10189/10212/10236/1025/10250/10262/10285/10291/10419/10450/10492/10521/10657/10713/10891/10898/10907/10914/10930/11052/11100/11129/11168/11171/11319/11325/116461/1207/123169/143884/144983/146713/1477/1479/154007/1653/1659/1660/1994/199746/2068/2071/2081/220988/22826/22827/22889/22916/22938/22944/22984/22985/23020/23028/23064/23076/23210/23248/23350/23435/23451/23…	248
ACC	GO:0071824	protein-DNA complex subunit organization	145/4600	244/14477	3.00568e-19	1.13784e-16	1.0338e-16	10001/10036/10541/1058/1062/1063/11176/11198/11339/126961/1385/142/1616/1642/1810/201254/2068/2071/2073/23126/23198/23523/2491/25842/29072/2958/2960/2965/2968/2972/3005/3006/3007/3008/3009/3014/3020/3070/3146/3148/3159/341567/375757/387103/401541/4171/4172/4173/4174/4175/4176/440689/4609/4673/4676/4678/50809/51053/51112/51773/54069/54107/54617/54623/55011/55166/55193/55320/55355/55506/55723/55839…	145
ACC	GO:0000375	RNA splicing, via transesterification reactions	182/4600	329/14477	4.15923e-19	1.48191e-16	1.34641e-16	100130932/10084/10179/10181/10189/10199/10212/10236/10250/10262/10285/10291/10419/10450/10492/10521/10657/10713/10898/10907/10914/11100/11168/11171/11325/1207/143884/146713/1477/1479/154007/1653/1659/1660/1994/199746/220988/22826/22827/22889/22916/22938/23020/23028/23064/23210/23350/23451/23543/2483/2521/25804/26528/26986/27258/27316/28960/2962/2963/29890/29894/29896/3178/3181/3183/3184/3185/3187…	182
ACC	GO:0000377	RNA splicing, via transesterification reactions with bulged adenosine as nucleophile	180/4600	326/14477	8.52941e-19	2.71909e-16	2.47046e-16	100130932/10084/10179/10181/10189/10212/10236/10250/10262/10285/10291/10419/10450/10492/10521/10657/10713/10898/10907/10914/11100/11168/11171/11325/1207/143884/146713/1477/1479/154007/1653/1659/1660/1994/199746/220988/22826/22827/22889/22916/22938/23020/23028/23064/23210/23350/23451/23543/2483/2521/25804/26528/26986/27258/27316/28960/2962/2963/29890/29894/29896/3178/3181/3183/3184/3185/3187/3189/…	180
ACC	GO:0000398	mRNA splicing, via spliceosome	180/4600	326/14477	8.52941e-19	2.71909e-16	2.47046e-16	100130932/10084/10179/10181/10189/10212/10236/10250/10262/10285/10291/10419/10450/10492/10521/10657/10713/10898/10907/10914/11100/11168/11171/11325/1207/143884/146713/1477/1479/154007/1653/1659/1660/1994/199746/220988/22826/22827/22889/22916/22938/23020/23028/23064/23210/23350/23451/23543/2483/2521/25804/26528/26986/27258/27316/28960/2962/2963/29890/29894/29896/3178/3181/3183/3184/3185/3187/3189/…	180
ACC	GO:0006402	mRNA catabolic process	185/4600	344/14477	1.13571e-17	3.27571e-15	2.97619e-15	10213/10236/10492/11224/11340/115024/129563/149041/1660/167227/1869/192669/1981/1994/2081/219988/22916/23016/23198/23369/23381/23404/23435/23521/23644/2475/25804/25873/25904/26019/26058/26135/26523/26986/27161/27254/27258/28960/3183/3184/3192/328/3315/340719/342977/3921/4116/4292/4343/4670/4686/4736/4849/4904/51010/51013/51154/51441/51594/51690/5433/5436/54890/55147/55149/5518/55544/5578/55795/56…	185
ACC	GO:0065004	protein-DNA complex assembly	126/4600	209/14477	1.31196e-17	3.61205e-15	3.28177e-15	10001/10036/10541/1058/1062/1063/11176/11339/126961/1385/142/1616/1642/1810/201254/2068/2071/2073/23126/23523/2491/25842/2958/2965/2968/2972/3005/3006/3007/3008/3009/3014/3020/3070/3146/3148/375757/387103/401541/4171/4172/4173/4174/4175/4176/440689/4673/4676/4678/50809/51053/51112/51773/54069/54107/55011/55166/55320/55355/55506/55723/55839/5702/5704/5706/57082/5887/5888/6117/6118/6119/6233/64105/…	126
ACC	GO:0006323	DNA packaging	119/4600	194/14477	1.56313e-17	4.11646e-15	3.74005e-15	10036/10051/10155/10270/1029/10541/1058/10592/11176/113130/11339/126961/130951/146059/148479/1616/1677/1786/1788/201254/22880/22985/23063/23198/23310/23347/23378/23397/23523/2491/25842/26155/26993/2852/29781/3005/3006/3007/3008/3009/3014/3020/3070/3148/3159/341567/387103/401541/4152/4171/440689/4673/4676/4678/50809/51203/51535/51773/5253/53615/54069/54107/54623/54892/55166/55320/55355/55506/55723…	119
ACC	GO:0000280	nuclear division	195/4600	374/14477	1.14503e-16	2.66747e-14	2.42356e-14	10051/10096/10270/10274/10403/10419/10459/10460/10464/10592/10609/10615/1062/1063/10783/11004/1104/11065/1111/11130/11200/113130/11331/116138/1164/122402/126353/126731/129563/130951/146909/146956/148479/151246/151648/152185/158401/1613/201254/2175/2177/22974/23063/23126/23310/23332/23353/23363/23397/23636/24137/245711/246184/256126/25788/259266/25936/26255/26271/26993/27085/27338/2801/2827/285643…	195
ACC	GO:0006612	protein targeting to membrane	114/4600	187/14477	1.43966e-16	3.22964e-14	2.93433e-14	10369/10952/11224/11261/130617/134/2039/2040/208/23463/23521/254887/25873/27342/283576/288/29082/29927/3265/3309/3921/401647/439/4641/4736/51304/5174/55176/5584/56288/56947/6122/6124/6125/6128/6129/6130/6132/6134/6135/6136/6137/6138/6139/6141/6142/6143/6146/6147/6154/6155/6156/6157/6158/6159/6160/6161/6164/6165/6167/6168/6169/6171/6175/6176/6181/6187/6188/6189/6191/6193/6194/6201/6202/6203/6204/6…	114
ACC	GO:0006401	RNA catabolic process	195/4600	375/14477	1.64688e-16	3.56256e-14	3.2368e-14	10213/10236/10492/10535/10940/11224/11340/115024/129563/149041/1660/167227/1763/1869/192669/1981/1994/2081/219988/2237/22916/23016/23198/23369/23381/23404/23435/23521/23644/246243/2475/25804/25873/25904/26019/26058/26135/26523/26986/27161/27254/27258/28960/3183/3184/3192/328/3315/340719/342977/3669/3921/4116/4292/4343/4670/4686/4736/4849/4904/51010/51013/51092/51154/51441/51594/51690/5433/5436/54…	195
ACC	GO:0000184	nuclear-transcribed mRNA catabolic process, nonsense-mediated decay	82/4600	120/14477	1.82006e-16	3.80142e-14	3.45382e-14	11224/167227/1981/22916/23381/23521/25873/26019/26986/3921/4116/4686/4736/51594/5518/6122/6124/6125/6128/6129/6130/6132/6134/6135/6136/6137/6138/6139/6141/6142/6143/6146/6147/6154/6155/6156/6157/6158/6159/6160/6161/6164/6165/6167/6168/6169/6171/6175/6176/6181/6187/6188/6189/6191/6193/6194/6201/6202/6203/6204/6205/6206/6207/6209/6210/6217/6218/6222/6223/6224/6227/6229/6230/6232/6233/6235/7311/9045…	82
ACC	GO:0042254	ribosome biogenesis	159/4600	290/14477	2.24453e-16	4.53171e-14	4.11734e-14	10153/10199/10360/10514/10521/10528/10556/10557/10799/10885/10969/11224/11340/114049/117246/14/1662/2091/220064/22868/22907/22984/23016/23076/23160/23378/23404/23481/23560/2483/25926/25983/26155/26168/26284/26574/27043/27341/28987/29889/29997/3669/3692/387338/3921/401466/4736/4809/4839/4927/4931/5036/51010/51013/51018/51068/51077/51096/51116/51118/51154/51202/51491/51602/54059/54475/54555/54606/5…	159
ACC	GO:1901991	negative regulation of mitotic cell cycle phase transition	124/4600	219/14477	1.9348e-14	3.55124e-12	3.22652e-12	10106/1017/1019/1021/10213/10263/1029/1031/1032/10385/10403/10459/10498/1063/10769/11170/11200/135458/144455/1647/1869/2033/2146/23194/23198/25793/25904/26058/26271/2810/28984/29980/29997/3275/3276/4085/4194/4582/4849/4998/5111/51143/51339/51512/5325/5347/54908/55367/55755/55795/5591/56155/5685/5686/5687/5688/5690/5691/5692/5693/5695/56984/5700/5702/5704/5706/57060/5707/5708/5710/5711/5715/57165/…	124
ACC	GO:0048285	organelle fission	204/4600	413/14477	3.32849e-14	5.76018e-12	5.23348e-12	10051/10096/10270/10274/10403/10419/10459/10460/10464/10592/10609/10615/1062/1063/10783/10891/11004/1104/11065/1111/11130/11200/113115/113130/11331/116138/1164/122402/126353/126731/129563/130951/146909/146956/148479/151246/151648/152185/158401/1613/201254/2175/2177/22974/23063/23126/23310/23332/23353/23363/23397/23636/24137/245711/246184/256126/25788/259266/25936/26255/26271/26993/27085/27338/280…	204
ACC	GO:0006260	DNA replication	142/4600	263/14477	4.74383e-14	7.76578e-12	7.05569e-12	10036/1017/10189/1025/10432/10524/10535/10714/10721/10919/10926/1111/11124/11143/11169/11177/11198/11200/11232/11284/114799/116028/116447/144455/146059/146956/157570/163859/1660/1663/1763/1854/1877/201254/2237/22944/23063/23560/23594/23649/253714/26271/27000/27101/27343/2956/29980/3159/3265/353497/3978/4171/4172/4173/4174/4175/4176/4673/4678/4784/4796/4928/4998/4999/5000/50485/51053/5111/51455/51…	142
ACC	GO:0000956	nuclear-transcribed mRNA catabolic process	116/4600	203/14477	5.61741e-14	8.95386e-12	8.13513e-12	11224/11340/115024/129563/149041/167227/1981/219988/22916/23016/23381/23404/23521/23644/25804/25873/25904/26019/26523/26986/27161/27258/28960/340719/342977/3921/4116/4292/4686/4736/4849/51010/51013/51154/51594/51690/5433/5436/55149/5518/55795/56915/57472/6122/6124/6125/6128/6129/6130/6132/6134/6135/6136/6137/6138/6139/6141/6142/6143/6146/6147/6154/6155/6156/6157/6158/6159/6160/6161/6164/6165/6167…	116
ACC	GO:0031497	chromatin assembly	95/4600	157/14477	9.35656e-14	1.45315e-11	1.32027e-11	10036/10155/1029/10541/1058/11176/11339/126961/130951/146059/1616/1786/1788/201254/22880/23347/23378/23523/2491/25842/26155/3005/3006/3007/3008/3009/3014/3020/3070/3148/3159/341567/387103/401541/4152/4171/440689/4673/4676/4678/50809/51535/51773/5253/53615/54069/54107/54623/55166/55320/55355/55506/55723/55839/57082/57343/57673/64105/6418/64946/6662/6839/7157/7175/7290/79019/79172/79682/79711/80152…	95
ACC	GO:1903311	regulation of mRNA metabolic process	157/4600	301/14477	1.08575e-13	1.64409e-11	1.49376e-11	10179/10181/10213/10236/1025/10262/10492/10521/10657/10898/10914/11052/11340/123169/146713/149041/1660/167227/1869/1981/1994/22916/22938/23016/23198/23210/23369/23404/23435/23543/2475/26058/26135/26528/26986/27161/27254/27316/29890/29896/3178/3181/3183/3184/3190/3191/3192/328/3297/3315/340719/342977/4116/4343/4670/4686/4904/4928/494115/51010/51013/51441/51594/51759/5436/54623/54890/55147/55234/55…	157
ACC	GO:0000082	G1/S transition of mitotic cell cycle	129/4600	236/14477	2.07241e-13	2.98872e-11	2.71543e-11	10106/1017/1019/1021/10263/1029/1031/1032/1033/10385/10498/10657/10769/10926/1104/11170/11200/11319/126520/128239/143384/144455/1543/1647/1719/1869/1978/1981/2033/2146/23476/23594/23649/245711/25793/25904/25988/26058/26271/27085/2810/28984/3275/3276/328/3398/3688/4171/4172/4173/4174/4175/4176/4194/4582/4609/4678/4849/4863/4998/4999/5000/51053/5111/51339/51512/5310/5325/54107/5426/5427/54617/55367…	129
ACC	GO:0006333	chromatin assembly or disassembly	105/4600	182/14477	3.78808e-13	5.33591e-11	4.848e-11	10036/10155/1029/10541/1058/11011/11176/11198/11339/126961/130951/146059/1616/1786/1788/201254/22880/23347/23378/23523/2491/25842/26155/3005/3006/3007/3008/3009/3014/3020/3070/3148/3159/341567/387103/401541/4152/4171/440689/4673/4676/4678/50809/51535/51773/5253/53615/54069/54107/54623/55166/55193/55320/55355/55506/55723/55839/57082/57343/57673/64105/6418/64946/6597/6598/6599/6602/6662/6839/7157/7…	105
ACC	GO:0006364	rRNA processing	118/4600	212/14477	4.17921e-13	5.75307e-11	5.22702e-11	10199/10360/10521/10528/10556/10557/10799/10885/10969/11224/11340/114049/117246/1662/2091/22984/23016/23076/23160/23378/23404/23481/23560/2483/25926/25983/26168/27043/27341/28987/29997/3669/387338/4736/4809/4839/4931/5036/51010/51013/51018/51077/51096/51118/51154/51202/51602/54059/54555/54606/54663/54881/54913/55006/55011/55035/55127/55226/55505/55646/55661/55695/55759/55813/56915/57109/57418/582…	118
ACC	GO:0006405	RNA export from nucleus	82/4600	132/14477	6.10836e-13	8.22185e-11	7.47006e-11	10189/10212/10250/10482/10657/10762/10898/11052/129401/1660/1984/199746/22916/23165/23225/23279/23381/23511/23636/26019/26097/26993/2733/29072/29890/29894/3178/3181/3267/3692/4116/4686/4927/4928/51068/51692/53981/5433/54890/55339/55677/55706/55746/55795/55998/57510/5901/5903/6059/6209/6426/6427/6428/6429/6431/6432/6741/6830/7175/7248/7307/7514/7919/79902/8021/8106/8189/81929/84271/84324/8480/8494…	82
ACC	GO:0022618	ribonucleoprotein complex assembly	105/4600	184/14477	9.85385e-13	1.29749e-10	1.17885e-10	100130932/10181/10291/10419/10480/10713/10856/10907/11052/11168/11171/1207/1653/1660/192669/1968/22868/22889/22907/23020/23064/23451/23521/25804/26284/26523/26747/27161/27316/27341/29997/3692/3921/4686/4809/4839/51154/51386/51631/5433/54475/55011/55015/56342/56853/56949/57461/58155/5822/6122/6125/6128/6134/6135/6136/6147/6169/6175/6193/6204/6209/6223/6232/6426/6431/6433/65003/6606/6631/6632/6633/…	105
ACC	GO:0071826	ribonucleoprotein complex subunit organization	108/4600	191/14477	1.05128e-12	1.35481e-10	1.23093e-10	100130932/10181/10291/10419/10480/10713/10856/10907/11052/11168/11171/1207/1653/1659/1660/192669/1968/22868/22889/22907/23020/23064/23451/23521/25804/26284/26523/26747/27161/27316/27341/29997/3692/3799/3831/3921/4686/4809/4839/51154/51386/51631/5433/54475/55011/55015/56342/56853/56949/57461/58155/5822/6122/6125/6128/6134/6135/6136/6147/6169/6175/6193/6204/6209/6223/6232/6426/6431/6433/65003/6606/…	108
ACC	GO:1902749	regulation of cell cycle G2/M phase transition	113/4600	205/14477	3.09136e-12	3.60084e-10	3.27158e-10	10121/1017/1019/10213/10383/1063/10733/11064/1111/115106/135458/1454/152110/1639/1778/1781/203068/22809/22897/22919/22974/22976/22994/22995/23194/23198/23332/23354/23476/26271/29086/29980/29997/4751/4957/4998/5087/5116/51512/51514/5347/54801/54820/54930/55125/55142/5518/55559/5566/55722/55755/5577/55835/55920/5685/5686/5687/5688/5690/5691/5692/5693/5695/5700/5702/5704/5706/5707/5708/5710/5711/571…	113
ACC	GO:0034470	ncRNA processing	180/4600	368/14477	3.27746e-12	3.67622e-10	3.34007e-10	10199/10360/10521/10528/10556/10557/10785/10799/10885/10898/10940/10969/11224/11340/114034/114049/116461/117246/129450/142940/1653/1662/192669/203522/2091/221078/22929/22984/23016/23076/23160/23378/23404/23481/23560/2483/25896/25926/25983/26168/26512/26523/26610/27043/27161/27341/283989/28987/29894/29997/3181/339175/339487/3669/387338/4087/4088/4736/4809/4839/4931/5036/51002/51010/51013/51018/510…	180
ACC	GO:0034728	nucleosome organization	86/4600	144/14477	3.82815e-12	4.21583e-10	3.83035e-10	10036/10541/1058/11198/11339/126961/1616/201254/23198/23523/2491/25842/29072/3005/3006/3007/3008/3009/3014/3020/3148/3159/341567/387103/401541/4171/440689/4673/4676/4678/50809/51773/54069/54107/54617/54623/55166/55193/55320/55355/55506/55723/55839/55929/57082/5757/64105/6418/64946/6597/6598/6599/6602/6662/6830/6944/7290/79019/79172/79682/79711/80152/81611/8208/8341/8344/8345/8347/8348/8349/8351/8…	86
ACC	GO:0016072	rRNA metabolic process	120/4600	222/14477	3.93192e-12	4.25279e-10	3.86392e-10	10199/10360/10521/10528/10556/10557/10799/10885/10969/11224/11340/114049/117246/1662/2091/22984/23016/23076/23160/23378/23404/23481/23560/2483/25926/25983/26168/27043/27341/28987/29997/3669/387338/4736/4809/4839/4931/5036/51010/51013/51018/51077/51096/51118/51154/51202/51602/54059/54555/54606/54663/54881/54913/55006/55011/55035/55127/55226/55505/55646/55661/55695/55759/55813/56915/57109/57418/582…	120
ACC	GO:0010389	regulation of G2/M transition of mitotic cell cycle	105/4600	188/14477	6.12558e-12	6.39701e-10	5.81208e-10	10121/1017/1019/10213/10383/1063/10733/11064/115106/135458/1454/1639/1778/1781/203068/22897/22919/22974/22994/22995/23194/23198/23332/23354/23476/26271/29980/29997/4751/4957/4998/5087/5116/51514/5347/54801/54820/54930/55125/55142/5518/55559/5566/55722/55755/5577/55835/55920/5685/5686/5687/5688/5690/5691/5692/5693/5695/5700/5702/5704/5706/5707/5708/5710/5711/5715/5717/5719/57504/5889/5890/60561/60…	105
ACC	GO:0000086	G2/M transition of mitotic cell cycle	126/4600	239/14477	1.13711e-11	1.16737e-09	1.06063e-09	10121/1017/1019/10213/10383/1063/10657/10733/11064/11113/11200/115106/135458/1454/1639/1778/1781/2029/203068/219771/22897/22919/22974/22994/22995/2305/23194/23198/23332/23354/23476/26271/29980/29997/4751/4957/4998/5087/5116/51400/51514/5243/5347/54801/54820/54850/54930/55125/55142/5518/55559/5566/55722/55755/5577/55835/55920/5685/5686/5687/5688/5690/5691/5692/5693/5695/5700/5702/5704/5706/5707/57…	126
ACC	GO:0006261	DNA-dependent DNA replication	87/4600	149/14477	1.60402e-11	1.61926e-09	1.4712e-09	1017/10189/1025/10714/10721/10926/11169/11177/11200/11232/11284/144455/146956/1663/1763/201254/2237/23594/23649/253714/26271/2956/29980/3159/353497/3978/4171/4172/4173/4174/4175/4176/4796/4998/4999/5000/50485/51053/5111/51659/54107/5424/5425/5426/5427/5428/54617/55388/5557/56652/56897/57418/57697/58525/5888/5980/5982/5983/5984/5985/6117/6118/6119/63922/641/675/79075/79733/79892/79915/81620/8317/8…	87
ACC	GO:0051168	nuclear export	105/4600	191/14477	2.2477e-11	2.19586e-09	1.99508e-09	10189/10212/10250/10482/10541/10657/10762/10898/11052/11261/126549/129401/1434/1660/1984/199746/22916/23165/23225/23279/23381/23511/23636/26019/26097/26993/2733/2810/29072/2932/29890/29894/3178/3181/3267/3429/3692/4116/4686/4927/4928/51068/51496/51512/51692/5310/53981/5433/54535/54890/55339/5566/55677/55706/55746/55795/55998/57510/5784/5901/5903/5905/6059/6209/6310/6426/6427/6428/6429/6431/6432/6…	105
ACC	GO:0006406	mRNA export from nucleus	68/4600	108/14477	2.3513e-11	2.22528e-09	2.0218e-09	10189/10212/10250/10482/10762/10898/129401/1984/199746/22916/23165/23225/23279/23381/23511/23636/26019/26097/26993/2733/29072/29890/29894/3181/3267/4116/4686/4927/4928/51692/53981/5433/54890/55339/55677/55706/55746/55795/55998/5903/6426/6427/6428/6429/6431/6432/6830/7175/7307/7919/79902/8021/8106/8189/81929/84271/84324/8480/8563/8683/8888/9295/9775/9785/9818/9877/9939/9984	68
ACC	GO:0071427	mRNA-containing ribonucleoprotein complex export from nucleus	68/4600	108/14477	2.3513e-11	2.22528e-09	2.0218e-09	10189/10212/10250/10482/10762/10898/129401/1984/199746/22916/23165/23225/23279/23381/23511/23636/26019/26097/26993/2733/29072/29890/29894/3181/3267/4116/4686/4927/4928/51692/53981/5433/54890/55339/55677/55706/55746/55795/55998/5903/6426/6427/6428/6429/6431/6432/6830/7175/7307/7919/79902/8021/8106/8189/81929/84271/84324/8480/8563/8683/8888/9295/9775/9785/9818/9877/9939/9984	68
ACC	GO:0006611	protein export from nucleus	98/4600	176/14477	3.90195e-11	3.58093e-09	3.2535e-09	10189/10212/10250/10482/10541/10762/10898/11261/126549/129401/1434/1984/199746/22916/23165/23225/23279/23381/23511/23636/26019/26097/26993/2733/2810/29072/2932/29890/29894/3181/3267/3429/3692/4116/4686/4927/4928/51068/51496/51512/51692/5310/53981/5433/54535/54890/55339/5566/55677/55706/55746/55795/55998/57510/5784/5901/5903/5905/6059/6209/6426/6427/6428/6429/6431/6432/64328/6741/6830/6934/7157/71…	98
ACC	GO:0034660	ncRNA metabolic process	210/4600	454/14477	4.24325e-11	3.83603e-09	3.48527e-09	10056/10199/10360/10521/10528/10556/10557/10785/10799/10885/10898/10940/10969/11224/11340/114034/114049/116461/117246/122402/129450/129563/142940/149041/1615/1653/1662/192669/201164/203522/2058/2091/2193/221078/22929/22984/23016/23076/23160/23378/23404/23481/23560/2483/25896/25926/25983/26168/26512/26523/26610/27043/27161/27341/283989/28987/29894/29997/3181/3265/3376/339175/339487/3669/387338/408…	210
ACC	GO:0006334	nucleosome assembly	68/4600	110/14477	7.8116e-11	6.95807e-09	6.32183e-09	10036/10541/1058/11339/126961/1616/201254/23523/2491/25842/3005/3006/3007/3008/3009/3014/3020/3148/387103/401541/4171/440689/4673/4676/4678/50809/51773/54069/54107/55166/55320/55355/55506/55723/55839/57082/64105/6418/64946/6662/7290/79019/79172/79682/79711/80152/8208/8341/8344/8345/8347/8348/8349/8351/8352/8353/8355/8357/8363/8364/8365/8370/8520/85236/8607/8970/8971/91687	68
ACC	GO:0006338	chromatin remodeling	103/4600	190/14477	1.04074e-10	8.87855e-09	8.06671e-09	10155/1029/10360/1058/10765/10856/11164/11176/11177/11335/11339/125476/126961/1616/1786/1788/1810/201254/22880/23030/23198/23314/23347/23378/2491/2625/283899/3020/3066/3070/3146/3148/3159/3183/3720/387103/401541/4152/4609/4678/473/51535/51773/5253/53615/54069/54107/54617/55011/55166/55193/55320/55355/55839/55929/57082/57343/57459/57492/5757/57673/57680/5927/64105/64946/6597/6598/6599/6602/6662/68…	103
ACC	GO:0050684	regulation of mRNA processing	76/4600	130/14477	2.80691e-10	2.32896e-08	2.11601e-08	10179/10181/1025/10262/10521/10657/10898/10914/11052/123169/146713/1660/22916/22938/23210/23543/26528/27316/29890/29896/3178/3181/3190/3191/3192/3297/4116/4686/4928/494115/51759/54623/55234/55677/56254/56853/5725/57703/58517/5936/6294/6426/6427/6428/6429/6431/6432/6433/6434/64783/6625/6626/6651/6732/6829/6830/7072/728642/79171/7936/79577/79811/79869/79882/8106/8241/83759/84872/84991/8683/891/9588…	76
ACC	GO:0006310	DNA recombination	133/4600	267/14477	4.91172e-10	4.02031e-08	3.6527e-08	10189/10213/10432/10459/10635/10721/10856/10933/1111/116028/116138/119392/1235/125476/135458/142/146956/158401/201254/2021/2067/2068/2187/2237/22944/22976/23028/23064/23347/2521/253714/2547/25788/27343/283899/29072/2956/29844/29893/3005/3006/3007/3008/3009/3014/3146/3148/328/3329/341567/353497/375757/3838/4171/4172/4173/4174/4175/4176/4292/4436/4439/4796/4798/51010/51176/51377/51444/51659/54617/5…	133
ACC	GO:0051028	mRNA transport	82/4600	146/14477	8.59069e-10	6.84655e-08	6.22052e-08	10189/10212/10250/10482/10762/10898/129401/143244/144983/1660/1984/199746/220988/22916/23165/23225/23279/23299/23381/23511/23636/26019/26097/26993/2733/29072/29890/29894/3178/3181/3267/3297/4116/4641/4686/4927/4928/51692/53981/5433/54890/55339/55421/55677/55706/55746/55795/55916/55998/5903/6426/6427/6428/6429/6431/6432/6830/7175/7307/7514/7919/79902/8021/8106/8189/81929/84271/84324/8480/8563/8570…	82
ACC	GO:2001251	negative regulation of chromosome organization	77/4600	135/14477	1.06188e-09	8.24589e-08	7.4919e-08	10403/10459/1063/142/167227/1786/2067/22823/23028/23063/25842/26155/26255/26271/26277/29028/3005/3006/3007/3008/3009/3020/3159/3178/3183/3192/341567/3720/4085/4171/4302/51143/5252/5253/5347/54454/54880/54908/55011/55226/55611/55755/55795/55818/56155/56848/56984/5927/6418/6598/672/6830/699/701/7153/7175/7272/7291/7517/7520/7756/80119/80312/81620/8260/8379/84861/8658/891/8971/9184/9212/9232/9319/93…	77
ACC	GO:0033044	regulation of chromosome organization	155/4600	325/14477	1.08442e-09	8.26825e-08	7.51222e-08	10155/1025/10270/10403/10459/10460/10474/10574/10575/10576/1062/1063/10694/10783/10856/10891/11011/1111/11143/11284/113130/116028/142/1499/1663/167227/1786/2067/2237/22823/22880/22938/22976/23028/23063/23381/23476/246184/25842/26053/26097/26147/26155/2625/26255/26271/26277/26354/26993/29028/3005/3006/3007/3008/3009/3020/3159/3178/3181/3183/3184/3192/341567/3670/3720/4000/4085/4089/4171/4288/4297/…	155
ACC	GO:0032392	DNA geometric change	69/4600	117/14477	1.09206e-09	8.26825e-08	7.51222e-08	10721/10856/142/1642/1653/1660/1663/1763/2068/2071/2074/22907/23064/2547/25788/2963/2965/2968/3146/3148/3159/3181/4171/4172/4173/4174/4175/4176/440081/50485/51659/54617/54821/56652/56852/56897/57680/5887/5888/5982/5983/5984/5985/6117/6233/63922/641/6832/7153/7157/7311/7316/7507/7520/79075/80119/8318/83990/84083/84296/8438/8451/84893/8607/93973/9401/9557/9837/9978	69
ACC	GO:0040029	regulation of gene expression, epigenetic	142/4600	293/14477	1.41294e-09	1.03111e-07	9.36825e-08	100124700/10514/10762/10933/1111/126374/126961/129401/1499/151507/1660/1786/1788/192669/1981/1994/2033/2074/2146/22823/22880/23165/23225/23264/23279/23347/23369/23451/23511/23512/23636/25842/25885/26058/26147/26523/27161/29028/29890/3005/3006/3007/3008/3009/3020/3146/3159/3181/3192/341567/3692/3720/4087/4088/4343/4641/4927/4928/51490/51535/51593/51742/5252/5431/5433/5434/5435/5436/5437/5438/5441/…	142
ACC	GO:0031124	mRNA 3'-end processing	59/4600	96/14477	1.91635e-09	1.38183e-07	1.25547e-07	10189/10212/1025/10250/10898/10914/11052/123169/1477/1479/199746/22916/23248/25888/26097/26986/29894/3297/4116/4686/51585/51692/53981/5433/54623/55149/55339/56254/6426/6427/6428/6429/6431/6432/64852/64895/6626/6829/7307/7919/7936/79577/79869/79882/80336/8106/8189/84271/84324/8563/8683/891/9295/9775/9785/9810/9877/9939/9984	59
ACC	GO:0031123	RNA 3'-end processing	76/4600	135/14477	3.0548e-09	2.1515e-07	1.95477e-07	10189/10212/1025/10250/10898/10914/11052/11340/114034/123169/1477/1479/199746/203522/2091/22916/23016/23248/23404/25888/25896/26097/26512/26986/29894/3297/4116/4686/51010/51585/51692/53981/5433/54623/55149/55339/56254/56915/6227/6426/6427/6428/6429/6431/6432/64852/64895/6626/6741/6829/6832/7307/79033/7919/7936/79577/79670/79869/79882/80336/80789/8106/81556/8189/84271/84324/8563/8683/891/9295/9775…	76
ACC	GO:0050657	nucleic acid transport	98/4600	187/14477	3.28198e-09	2.25897e-07	2.05241e-07	10189/10212/10250/10482/10657/10762/10898/11052/129401/143244/144983/1660/1984/199746/220988/22916/23165/23225/23279/23299/23381/23511/23636/26019/26097/26993/2733/29072/29890/29894/3178/3181/3192/3267/3297/3692/4116/4641/4686/4927/4928/51068/51092/51637/51692/53981/5433/54890/55339/55421/55677/55706/55746/55795/55916/55998/57510/5901/5903/6059/6209/6421/6426/6427/6428/6429/6431/6432/6741/6830/71…	98
ACC	GO:0098781	ncRNA transcription	62/4600	104/14477	4.18948e-09	2.8512e-07	2.59049e-07	10208/1025/10360/10927/1663/22916/23248/2475/25896/25926/26512/283/2958/2960/2961/2962/2963/2972/2976/29997/4686/4691/51547/51593/5431/5433/5434/5435/5436/5437/5438/5441/54973/55011/55506/64425/64768/65123/6597/6598/6618/6621/6667/6877/6878/6882/7157/7702/79871/80237/80789/81556/8178/84172/84365/84524/8812/9014/905/92105/9328/9329	62
ACC	GO:0030261	chromosome condensation	30/4600	39/14477	8.60775e-09	5.72936e-07	5.20547e-07	10051/10270/10592/113130/148479/1677/22985/23063/23310/23397/26993/2852/29781/3005/3006/3007/3008/3009/3020/341567/51203/54892/64151/7153/8091/8815/891/8971/983/9918	30
ACC	GO:0032508	DNA duplex unwinding	63/4600	108/14477	1.04083e-08	6.70671e-07	6.09346e-07	10721/10856/142/1642/1653/1660/1663/1763/2068/2071/2074/22907/23064/2547/25788/2963/2965/2968/3159/4171/4172/4173/4174/4175/4176/440081/51659/54617/54821/56652/56852/56897/57680/5887/5888/5982/5983/5984/5985/6117/6233/63922/641/6832/7153/7311/7316/7507/7520/79075/80119/8318/83990/84083/84296/8451/84893/8607/93973/9401/9557/9837/9978	63
ACC	GO:0006605	protein targeting	185/4600	413/14477	1.33063e-08	8.48385e-07	7.7081e-07	10055/10369/10440/10452/10455/10456/10490/10531/10717/10755/10901/10952/10971/11001/11140/11154/11224/11261/118424/130617/134/1384/143187/1891/2039/2040/208/219743/23203/23230/23431/23463/23480/23521/254887/25793/25813/25873/26061/26520/26985/27342/27429/283576/288/28972/29082/2931/29927/29928/3265/3309/3329/3417/3921/401505/401647/4053/439/4641/4736/51/51179/51304/5174/5192/5194/5195/5373/55072/…	185
ACC	GO:0010965	regulation of mitotic sister chromatid separation	39/4600	57/14477	1.42605e-08	8.99751e-07	8.17479e-07	10403/10459/10460/1062/1063/10783/246184/26255/26271/4085/51143/51433/51529/5347/54908/55755/55795/56155/56984/64682/699/701/7175/7272/7517/7756/81620/8379/8452/84861/891/9184/9212/9232/9319/9700/9787/990/991	39
ACC	GO:0090305	nucleic acid phosphodiester bond hydrolysis	135/4600	284/14477	1.6525e-08	1.03187e-06	9.37521e-07	10535/10556/10557/10714/10799/10898/10940/11052/11284/11340/114034/1149/116461/122651/126549/129563/142/146956/1479/1642/1653/167227/1677/1763/1775/1776/192669/201164/2021/2067/2068/2071/2073/2081/2237/22916/23016/23052/23404/23644/246243/25996/26523/27161/283/283989/284131/28960/28987/2965/2968/29894/3005/3146/3148/328/3297/3669/3837/4343/4686/4913/51010/51013/51077/5111/51585/5167/51692/53981/5…	135
ACC	GO:0033047	regulation of mitotic sister chromatid segregation	44/4600	68/14477	2.34579e-08	1.42084e-06	1.29092e-06	10403/10459/10460/1062/1063/10783/246184/26255/26271/3192/4085/4926/51143/51433/51529/5347/54908/55719/55755/55795/56155/56984/64682/699/701/7175/7272/7517/7756/81620/8260/8379/8452/84861/8658/891/9184/9212/9232/9319/9700/9787/990/991	44
ACC	GO:0070646	protein modification by small protein removal	128/4600	268/14477	2.72302e-08	1.633e-06	1.48368e-06	100170841/10208/10213/10254/10454/10474/10617/10713/10869/10920/114785/124739/125476/126119/154/171023/1861/2033/221937/23198/23252/23326/26168/2625/27005/283899/2873/29086/29844/29997/329/3607/387/4087/4088/4089/4194/4287/4609/4738/4798/51029/51035/51377/54532/54617/54764/54891/55432/55611/55777/5685/5686/5687/5688/5690/5691/5692/5693/5695/56957/56970/5700/5702/5704/5706/5707/5708/5710/5711/5715…	128
ACC	GO:0007091	metaphase/anaphase transition of mitotic cell cycle	37/4600	54/14477	3.16163e-08	1.82868e-06	1.66147e-06	10403/10459/10460/1062/1063/10783/246184/26271/4085/51143/51433/51529/5347/54908/55755/55795/56155/56984/64682/699/701/7175/7272/7517/7756/81620/8379/8452/84861/891/9184/9212/9319/9700/9787/990/991	37
ACC	GO:0034724	DNA replication-independent nucleosome organization	35/4600	50/14477	3.17008e-08	1.82868e-06	1.66147e-06	1058/11198/11339/201254/23523/2491/25842/3020/387103/401541/4678/51773/54069/54107/55166/55320/55355/55723/55839/57082/64105/64946/7290/79019/79172/79682/79711/80152/8363/8364/8365/8370/8520/8607/91687	35
ACC	GO:0016579	protein deubiquitination	121/4600	252/14477	4.45724e-08	2.52313e-06	2.29242e-06	100170841/10213/10254/10454/10474/10617/10713/10869/114785/124739/125476/126119/154/171023/2033/221937/23198/23252/23326/2625/27005/283899/29086/29844/29997/329/3607/387/4087/4088/4089/4194/4287/4609/4738/4798/51029/51035/51377/54532/54617/54764/54891/55432/55611/55777/5685/5686/5687/5688/5690/5691/5692/5693/5695/56957/56970/5700/5702/5704/5706/5707/5708/5710/5711/5715/5717/5719/5728/57559/57599/…	121
ACC	GO:0006354	DNA-templated transcription, elongation	62/4600	109/14477	5.04275e-08	2.82815e-06	2.56954e-06	10189/1025/11198/123169/2068/2071/2074/2146/22916/23476/25885/25920/26610/29072/2962/2963/2965/2968/3150/3192/4298/4300/4686/51497/5431/5433/5434/5435/5436/5437/5438/5441/5457/54623/55193/55250/55677/55795/57805/64425/6749/6827/6829/6830/7343/79101/7919/7936/79577/80237/8178/84172/8563/8812/8861/9013/9014/9015/905/9150/9533/9984	62
ACC	GO:0006289	nucleotide-excision repair	61/4600	107/14477	5.75972e-08	3.17151e-06	2.88151e-06	10450/10714/10920/11284/135458/142/1642/2033/2067/2068/2071/2073/2074/2176/27343/2873/2965/2968/3150/3978/4287/4913/5111/5424/5425/5426/5431/5433/5434/5435/5436/5437/5438/5441/55247/56949/57461/5886/5887/5982/5983/5984/5985/6117/6118/6119/6233/64210/64708/675/7157/7311/7316/7507/79661/83990/8451/8533/91603/9557/9978	61
ACC	GO:0051784	negative regulation of nuclear division	37/4600	55/14477	6.70355e-08	3.5617e-06	3.23603e-06	10403/10459/1063/1111/26255/26271/27085/286151/28984/4085/51143/5347/54908/55755/55795/56155/56984/5810/652/655/699/701/7175/7272/7517/7756/81620/8260/8379/84861/8658/891/9184/9212/9232/9319/991	37
ACC	GO:0030071	regulation of mitotic metaphase/anaphase transition	35/4600	51/14477	7.01517e-08	3.65378e-06	3.31968e-06	10403/10459/1062/1063/10783/246184/26271/4085/51143/51433/51529/5347/54908/55755/55795/56155/56984/699/701/7175/7272/7517/7756/81620/8379/8452/84861/891/9184/9212/9319/9700/9787/990/991	35
ACC	GO:0006336	DNA replication-independent nucleosome assembly	34/4600	49/14477	7.05782e-08	3.65378e-06	3.31968e-06	1058/11339/201254/23523/2491/25842/3020/387103/401541/4678/51773/54069/54107/55166/55320/55355/55723/55839/57082/64105/64946/7290/79019/79172/79682/79711/80152/8363/8364/8365/8370/8520/8607/91687	34
ACC	GO:0043484	regulation of RNA splicing	69/4600	126/14477	7.18625e-08	3.68874e-06	3.35145e-06	10084/10179/10181/10262/10521/10657/10922/1195/1196/1198/146713/2081/22938/23064/23076/23210/23543/2521/26528/27316/29890/29896/3178/3181/3185/3187/3190/3191/3192/4116/4686/4928/494115/51759/54845/55234/55544/56853/5725/57703/58155/58517/5936/6207/6426/6427/6428/6429/6431/6432/6433/6434/64783/6625/6651/6732/7072/79171/8241/83759/84872/84991/8683/8882/92906/9588/9904/9939/9991	69
ACC	GO:0015931	nucleobase-containing compound transport	112/4600	231/14477	7.33218e-08	3.73202e-06	3.39077e-06	10189/10212/10237/10250/10478/10482/10559/10657/10762/10898/11046/11052/114789/129401/134/143244/144983/1660/1984/199746/2030/220988/222962/22916/23165/23225/23279/23299/23381/23511/23636/26019/26097/26993/2733/29072/29890/29894/3178/3181/3192/3267/3297/339665/3692/4116/4641/4686/4927/4928/51068/51092/51637/51692/53981/5433/54890/55339/55343/55421/55677/55706/55746/55795/55916/55998/57510/5901/59…	112
ACC	GO:0006913	nucleocytoplasmic transport	149/4600	326/14477	7.40084e-08	3.73558e-06	3.394e-06	10155/10189/10212/10250/10482/10541/10553/10657/10736/10762/10898/11052/11142/11261/11331/126549/129401/1434/1660/1894/1984/199746/2254/22916/23165/23225/23279/23381/23435/23511/23520/23636/26019/26097/26993/2733/2737/2810/29072/2932/29890/29894/30000/3178/3181/3267/3429/3692/3837/3838/3839/3843/4000/4088/4116/4686/4927/4928/51068/51496/51501/51512/51684/51692/5310/53981/5433/54535/5469/54890/550…	149
ACC	GO:0031145	anaphase-promoting complex-dependent catabolic process	48/4600	79/14477	1.01574e-07	5.08458e-06	4.61966e-06	1017/10213/11065/119504/23198/246184/26271/27338/29882/4085/51433/51434/51529/5347/5685/5686/5687/5688/5690/5691/5692/5693/5695/5700/5702/5704/5706/5707/5708/5710/5711/5715/5717/5719/6233/64682/6790/701/7311/7316/8452/891/9184/9212/9232/983/9861/991	48
ACC	GO:0045815	positive regulation of gene expression, epigenetic	36/4600	54/14477	1.43547e-07	7.0118e-06	6.37065e-06	10514/1111/1499/2033/2074/23451/25842/25885/29028/3005/3006/3007/3008/3009/3159/341567/4641/5434/5435/5437/5441/54454/56848/57492/64425/6602/79101/7913/80336/84172/8971/9013/9014/9015/9188/9533	36
ACC	GO:1902099	regulation of metaphase/anaphase transition of cell cycle	35/4600	52/14477	1.49002e-07	7.22003e-06	6.55985e-06	10403/10459/1062/1063/10783/246184/26271/4085/51143/51433/51529/5347/54908/55755/55795/56155/56984/699/701/7175/7272/7517/7756/81620/8379/8452/84861/891/9184/9212/9319/9700/9787/990/991	35
ACC	GO:0033048	negative regulation of mitotic sister chromatid segregation	30/4600	42/14477	1.50958e-07	7.25675e-06	6.59321e-06	10403/10459/1063/26255/26271/4085/51143/5347/54908/55755/55795/56155/56984/699/701/7175/7272/7517/7756/81620/8260/8379/84861/8658/891/9184/9212/9232/9319/991	30
ACC	GO:0002181	cytoplasmic translation	55/4600	96/14477	2.03983e-07	9.72855e-06	8.83899e-06	10480/1660/1802/1938/1968/1973/1978/1981/23521/2475/25873/3921/4733/4736/51182/51372/51386/51389/51441/55854/56339/5936/6128/6132/6135/6138/6139/6141/6142/6143/6154/6156/6159/6160/6161/6165/6169/6171/6175/6176/6227/6235/7458/8531/8562/8661/8662/8663/8664/8665/8666/8669/8894/90381/92715	55
ACC	GO:0016569	covalent chromatin modification	189/4600	437/14477	2.12647e-07	9.98452e-06	9.07156e-06	100170841/10155/1017/1025/10270/10419/10432/10474/10498/10524/10765/10856/10891/10919/10933/11091/1111/11143/11176/11177/123169/147746/1499/151507/1642/171023/1786/1788/1810/200186/200424/2005/2033/2091/2140/2146/221037/22823/22880/22938/22976/22992/23028/23030/23186/23210/23309/23326/23429/23476/23512/23774/25855/26053/26097/26122/26147/26155/2625/26993/27005/27154/28989/29072/29128/3006/3007/30…	189
ACC	GO:2000045	regulation of G1/S transition of mitotic cell cycle	76/4600	146/14477	2.64537e-07	1.23254e-05	1.11984e-05	10106/1017/1019/1021/10263/1029/1031/1032/10385/10498/10769/11170/11200/11319/126520/144455/1543/1647/1869/1981/2033/2146/25793/25904/26058/27085/2810/28984/3275/3276/328/3398/4194/4582/4849/5111/51339/51512/5310/5325/54617/55367/55904/5591/57060/57165/5728/57472/57521/581/58190/5933/6118/6154/6790/6868/7015/7027/7157/7465/79027/79577/79733/81853/8318/835/8451/8737/891/898/9125/9510/983/990/9928/…	76
ACC	GO:0006298	mismatch repair	26/4600	35/14477	2.91685e-07	1.34865e-05	1.22533e-05	10535/10714/2067/25/29072/2956/3146/3978/4292/4436/4439/4595/5111/5378/5383/5387/5424/5425/6117/6118/6119/6996/7161/8313/83933/9156	26
ACC	GO:0006296	nucleotide-excision repair, DNA incision, 5'-to lesion	27/4600	37/14477	3.15425e-07	1.44737e-05	1.31503e-05	10714/142/1642/2067/2068/2071/2073/2965/2968/4913/5111/5424/5425/5982/5983/5984/5985/6117/6118/6119/6233/7311/7316/7507/8451/9557/9978	27
ACC	GO:2000816	negative regulation of mitotic sister chromatid separation	28/4600	39/14477	3.32431e-07	1.4944e-05	1.35776e-05	10403/10459/1063/26255/26271/4085/51143/5347/54908/55755/55795/56155/56984/699/701/7175/7272/7517/7756/81620/8379/84861/891/9184/9212/9232/9319/991	28
ACC	GO:0042273	ribosomal large subunit biogenesis	42/4600	68/14477	3.33076e-07	1.4944e-05	1.35776e-05	10969/11224/117246/14/220064/22868/22907/23481/23560/26155/29997/3692/4736/4809/4839/4931/51154/51491/54475/54663/55759/56342/6122/6125/6128/6129/6130/6134/6135/6136/6147/6154/6165/6169/6175/65003/6838/84154/84231/8886/9045/9326	42
ACC	GO:1902806	regulation of cell cycle G1/S phase transition	81/4600	159/14477	3.55739e-07	1.58435e-05	1.43948e-05	10106/1017/1019/1021/10263/1029/1031/1032/10385/10498/10769/11170/11200/11319/11331/126520/144455/1543/1647/1869/1981/2033/2146/25793/25904/26058/27085/2810/28984/3275/3276/328/3398/4194/4221/4582/4849/493/5111/51339/51512/5310/5325/54617/54623/55367/55904/5591/57060/57165/5728/57472/57521/581/58190/5933/6118/6154/6790/6868/7015/7027/7157/7465/79027/79577/79733/81610/81853/8318/835/8451/8737/891/…	81
ACC	GO:0006302	double-strand break repair	111/4600	235/14477	4.53042e-07	2.00298e-05	1.81983e-05	10038/10213/10459/10524/10635/10721/10933/1111/11200/113130/116028/119392/135458/142/146956/157570/1653/1663/1763/2067/2140/2187/2237/22976/22992/23028/2305/23064/23347/2521/253714/2547/25788/27343/286257/29072/29086/3014/3297/353497/375757/4171/4172/4173/4174/4175/4176/4292/4436/4796/51444/51659/54617/55010/55135/55183/55611/55719/55775/5591/56893/57599/5888/5889/5890/5892/5980/6117/6118/6119/64…	111
ACC	GO:0016570	histone modification	183/4600	425/14477	4.74501e-07	2.06806e-05	1.87896e-05	100170841/1017/1025/10270/10419/10432/10474/10498/10524/10765/10856/10891/10919/10933/11091/1111/11143/11176/11177/123169/147746/1499/151507/1642/171023/1786/1810/200186/200424/2005/2033/2091/2140/2146/221037/22823/22938/22976/22992/23028/23030/23186/23210/23309/23326/23429/23476/23512/23774/25855/26053/26097/26122/26147/26155/2625/26993/27005/27154/28989/29072/29128/3006/3007/3008/3009/3066/3082…	183
ACC	GO:0006283	transcription-coupled nucleotide-excision repair	44/4600	73/14477	4.74593e-07	2.06806e-05	1.87896e-05	10450/10714/10920/1642/2033/2067/2068/2071/2073/2074/2873/2965/2968/3150/3978/5111/5424/5425/5431/5433/5434/5435/5436/5437/5438/5441/56949/57461/5982/5983/5984/5985/6117/6118/6119/6233/64708/7311/7316/7507/8451/8533/91603/9978	44
ACC	GO:1902807	negative regulation of cell cycle G1/S phase transition	57/4600	103/14477	6.04864e-07	2.58004e-05	2.34413e-05	10106/1017/1019/1021/10263/1029/1031/1032/10385/10498/10769/11170/11200/144455/1647/1869/2033/2146/25793/25904/26058/2810/28984/3275/3276/4194/4221/4582/4849/5111/51339/51512/5325/55367/5591/57060/57165/5728/57472/581/58190/5933/6118/6154/6790/7027/7157/7465/79027/79577/79733/835/8737/891/9125/983/995	57
ACC	GO:0036297	interstrand cross-link repair	34/4600	52/14477	6.40899e-07	2.71463e-05	2.46641e-05	10635/146956/199990/201254/2067/2175/2176/2177/2178/2187/2189/29089/2956/353497/55215/57599/57697/5888/5892/6117/6118/6119/6233/64421/64789/64858/7311/7316/7398/7507/7517/80198/80233/91442	34
ACC	GO:0007094	mitotic spindle assembly checkpoint	25/4600	34/14477	6.88614e-07	2.83737e-05	2.57792e-05	10403/10459/1063/4085/51143/5347/54908/55755/55795/56155/56984/699/701/7175/7272/7517/7756/81620/8379/84861/891/9184/9212/9319/991	25
ACC	GO:2000134	negative regulation of G1/S transition of mitotic cell cycle	56/4600	101/14477	6.96428e-07	2.85018e-05	2.58956e-05	10106/1017/1019/1021/10263/1029/1031/1032/10385/10498/10769/11170/11200/144455/1647/1869/2033/2146/25793/25904/26058/2810/28984/3275/3276/4194/4582/4849/5111/51339/51512/5325/55367/5591/57060/57165/5728/57472/581/58190/5933/6118/6154/6790/7027/7157/7465/79027/79577/79733/835/8737/891/9125/983/995	56
ACC	GO:0016571	histone methylation	67/4600	127/14477	7.03506e-07	2.85982e-05	2.59832e-05	10419/10498/10919/11091/1499/1786/200424/2091/2146/22823/22938/22976/23028/23476/23512/26053/26097/26147/2625/28989/29072/3006/3007/3008/3009/30827/3275/3276/3720/387893/4000/4089/4221/4297/4302/51111/51742/5252/54623/54880/55011/55183/55209/55677/55818/55904/56254/56950/57343/57673/64324/6598/672/6830/6839/7468/7936/79723/79813/80312/80335/84444/84787/9070/90780/94104/9869	67
ACC	GO:0045841	negative regulation of mitotic metaphase/anaphase transition	26/4600	36/14477	7.31778e-07	2.93535e-05	2.66695e-05	10403/10459/1063/26271/4085/51143/5347/54908/55755/55795/56155/56984/699/701/7175/7272/7517/7756/81620/8379/84861/891/9184/9212/9319/991	26
ACC	GO:1902100	negative regulation of metaphase/anaphase transition of cell cycle	26/4600	36/14477	7.31778e-07	2.93535e-05	2.66695e-05	10403/10459/1063/26271/4085/51143/5347/54908/55755/55795/56155/56984/699/701/7175/7272/7517/7756/81620/8379/84861/891/9184/9212/9319/991	26
ACC	GO:0008213	protein alkylation	82/4600	164/14477	8.22078e-07	3.25446e-05	2.95688e-05	10419/10498/10919/11091/115294/1499/151194/1786/200424/2091/2146/22823/22938/22976/23028/23463/23476/23512/25895/26053/26097/26147/2625/28989/29072/3006/3007/3008/3009/30827/3275/3276/3720/387893/399818/4000/4089/4221/4297/4302/51111/51603/51742/5252/54623/54880/55011/55183/55209/55471/55677/55818/55904/56254/56950/57343/57673/5870/635/64324/6598/6634/672/6830/6839/7468/751071/79091/7936/79609/79…	82
ACC	GO:0051783	regulation of nuclear division	85/4600	173/14477	1.32879e-06	5.21764e-05	4.74055e-05	10274/10403/10419/10459/10460/1062/1063/10783/1104/11065/1111/113130/11331/126731/1613/23363/23636/246184/26255/26271/27085/2827/286151/28984/3192/3479/3832/4085/4288/4487/4733/4751/4926/51143/51203/51433/51529/5347/54361/54443/54461/54908/55719/55755/55795/56155/56984/57026/5810/5902/64682/64793/652/655/6790/699/701/7175/7272/7474/7517/7756/79598/79866/81620/8260/8379/8452/84861/8658/8877/891/90…	85
ACC	GO:0034508	centromere complex assembly	33/4600	51/14477	1.33521e-06	5.21764e-05	4.74055e-05	1058/1062/1063/11339/201254/23126/2491/3020/3070/387103/401541/4678/51112/51773/54069/54107/55166/55320/55355/55839/57082/64105/64946/79019/79172/79682/80152/8363/8364/8365/8370/8607/91687	33
ACC	GO:0048024	regulation of mRNA splicing, via spliceosome	51/4600	91/14477	1.40006e-06	5.43601e-05	4.93895e-05	10179/10181/10262/10521/10657/146713/22938/23210/23543/26528/27316/29890/29896/3178/3181/3190/3191/3192/4116/4686/4928/494115/51759/55234/56853/5725/57703/58517/5936/6426/6427/6428/6429/6431/6432/6433/6434/64783/6625/6651/6732/7072/79171/8241/83759/84872/84991/8683/9588/9904/9939	51
ACC	GO:0031055	chromatin remodeling at centromere	29/4600	43/14477	1.64884e-06	6.32092e-05	5.74294e-05	1058/11339/201254/2491/3020/3070/387103/401541/4678/51773/54069/54107/55166/55320/55355/55839/57082/64105/64946/79019/79172/79682/80152/8363/8364/8365/8370/8607/91687	29
ACC	GO:0033683	nucleotide-excision repair, DNA incision	27/4600	39/14477	1.71889e-06	6.42673e-05	5.83908e-05	10714/142/1642/2067/2068/2071/2073/2965/2968/4913/5111/5424/5425/5982/5983/5984/5985/6117/6118/6119/6233/7311/7316/7507/8451/9557/9978	27
ACC	GO:0034080	CENP-A containing nucleosome assembly	27/4600	39/14477	1.71889e-06	6.42673e-05	5.83908e-05	1058/11339/201254/2491/387103/401541/4678/51773/54069/54107/55166/55320/55355/55839/57082/64105/64946/79019/79172/79682/80152/8363/8364/8365/8370/8607/91687	27
ACC	GO:0061641	CENP-A containing chromatin organization	27/4600	39/14477	1.71889e-06	6.42673e-05	5.83908e-05	1058/11339/201254/2491/387103/401541/4678/51773/54069/54107/55166/55320/55355/55839/57082/64105/64946/79019/79172/79682/80152/8363/8364/8365/8370/8607/91687	27
ACC	GO:0018205	peptidyl-lysine modification	161/4600	373/14477	1.92308e-06	7.14608e-05	6.49265e-05	10054/10055/10155/10208/10362/10401/10474/10524/10536/10609/10762/10856/10891/10919/10933/11091/1111/11143/11177/114799/129401/1499/151194/151507/1786/1810/200186/200424/2033/2146/22823/22938/22976/23028/23165/23210/23225/23279/23326/23476/23511/23512/23636/23774/25895/26053/26122/26147/26155/26168/2625/26354/27154/29072/3006/3007/3008/3009/3066/30827/3670/3720/387893/399818/4000/4017/405/4089/42…	161
ACC	GO:0043044	ATP-dependent chromatin remodeling	45/4600	78/14477	1.97108e-06	7.27978e-05	6.61413e-05	1058/11339/201254/23198/2491/3066/3183/387103/401541/4678/51773/53615/54069/54107/54617/55166/55193/55320/55355/55839/55929/57082/57459/5757/57680/64105/64946/6597/6598/6599/6944/79019/79172/79682/80152/81611/8363/8364/8365/8370/86/8607/91687/9219/93973	45
ACC	GO:0034401	chromatin organization involved in regulation of transcription	58/4600	109/14477	2.6847e-06	9.71041e-05	8.82251e-05	100124700/10155/1029/10933/1111/11176/126961/1499/151507/1786/1788/2146/22880/23347/23378/25842/29028/3005/3006/3007/3008/3009/3020/3070/3146/3159/341567/4152/51535/5253/53615/54454/55183/57343/57492/57673/6602/6839/7175/7290/80312/80336/8091/8318/8351/8352/8353/8355/8357/8363/8364/8365/8370/84444/84759/8520/8971/9869	58
ACC	GO:0018022	peptidyl-lysine methylation	62/4600	119/14477	3.12158e-06	0.000111878	0.000101648	10919/11091/1499/151194/1786/200424/2146/22823/22938/22976/23028/23476/23512/25895/26053/26147/2625/29072/3006/3007/3008/3009/30827/3720/387893/399818/4000/4089/4221/4297/4302/51111/51742/5252/54880/55011/55183/55209/55677/55818/55904/56950/57343/57673/64324/6598/672/6830/6839/7468/751071/79091/7936/79609/79723/79813/80335/84444/84787/9070/90780/9869	62
ACC	GO:0000727	double-strand break repair via break-induced replication	11/4600	11/14477	3.30617e-06	0.000117108	0.0001064	4171/4172/4173/4174/4175/4176/51659/80198/8317/8318/84296	11
ACC	GO:0097549	chromatin organization involved in negative regulation of transcription	53/4600	98/14477	3.77813e-06	0.000132278	0.000120183	100124700/10155/1029/10933/11176/126961/151507/1786/1788/2146/22880/23347/23378/25842/29028/3005/3006/3007/3008/3009/3020/3070/3146/3159/341567/4152/51535/5253/53615/54454/55183/57343/57673/6839/7175/7290/80312/8091/8318/8351/8352/8353/8355/8357/8363/8364/8365/8370/84444/84759/8520/8971/9869	53
ACC	GO:0032200	telomere organization	80/4600	164/14477	3.82889e-06	0.000132843	0.000120696	10574/10575/10576/10694/10714/11284/135458/142/1499/167227/1763/2067/220064/2237/23381/23649/2547/26277/26354/3020/3104/3178/3181/3183/3184/3192/328/4609/4751/50485/5111/54107/5424/5425/5426/5427/55135/55183/55226/55505/5557/5591/5594/56252/5888/5889/5892/5982/5983/5984/5985/6117/6118/6119/641/64421/64858/675/7011/7015/7203/7517/7520/80119/8351/8352/8353/8355/8357/8363/8364/8365/8370/84444/8658/8…	80
ACC	GO:0006270	DNA replication initiation	25/4600	36/14477	3.83811e-06	0.000132843	0.000120696	1017/23594/23649/4171/4172/4173/4174/4175/4176/4998/4999/5000/54107/5426/5427/55388/5557/56897/57418/81620/8318/898/90381/990/997	25
ACC	GO:0043486	histone exchange	32/4600	51/14477	5.14351e-06	0.000176013	0.000159918	1058/11339/201254/23198/2491/387103/401541/4678/51773/54069/54107/55166/55320/55355/55839/55929/57082/5757/64105/64946/6944/79019/79172/79682/80152/81611/8363/8364/8365/8370/8607/91687	32
ACC	GO:0034968	histone lysine methylation	56/4600	106/14477	5.30439e-06	0.000180498	0.000163994	10919/11091/1499/1786/200424/2146/22823/22938/22976/23028/23476/23512/26053/26147/2625/29072/3006/3007/3008/3009/30827/3720/387893/4000/4089/4221/4297/4302/51111/51742/5252/54880/55011/55183/55209/55677/55818/55904/56950/57343/57673/64324/6598/672/6830/6839/7468/7936/79723/79813/80335/84444/84787/9070/90780/9869	56
ACC	GO:0090307	mitotic spindle assembly	34/4600	56/14477	7.51842e-06	0.000252995	0.000229861	10274/10464/11200/126353/126731/152185/22974/23332/24137/2801/285643/29127/3192/332/3832/3833/3837/387/440145/4605/4733/4751/49856/5347/55125/55154/56647/7175/7756/79598/9126/9212/9493/991	34
ACC	GO:0044773	mitotic DNA damage checkpoint	51/4600	95/14477	7.57305e-06	0.000253425	0.000230252	1017/10498/10769/11200/135458/144455/146956/1647/1869/2033/25904/26058/2810/28984/29980/29997/3276/4194/4436/4582/4849/5111/51512/5325/55367/5591/57060/57472/581/5883/60561/6118/6154/63967/641/6790/7027/7157/79733/80198/80279/8091/835/84446/891/9125/91603/9344/9656/983/995	51
ACC	GO:0040001	establishment of mitotic spindle localization	22/4600	31/14477	8.51878e-06	0.000283507	0.000257584	10120/10121/10253/10403/1058/126353/1639/23332/29899/3837/4085/4926/5080/51203/5347/54820/54908/55755/56647/81565/89958/9700	22
ACC	GO:0009303	rRNA transcription	23/4600	33/14477	8.5867e-06	0.000284206	0.000258218	10360/10927/1663/2475/25926/283/2972/2976/29997/4691/51547/55011/55506/64425/64768/6597/6598/7157/84172/84365/9014/9328/9329	23
ACC	GO:1905268	negative regulation of chromatin organization	32/4600	52/14477	9.30736e-06	0.000306384	0.000278369	1786/22823/23028/25842/26155/29028/3005/3006/3007/3008/3009/3159/341567/3720/4302/5252/5253/54454/54880/55011/55611/55818/56848/5927/6418/6598/672/6830/7291/80312/8971/9320	32
ACC	GO:0035195	gene silencing by miRNA	70/4600	142/14477	9.55949e-06	0.000312983	0.000284364	10762/126374/126961/129401/1660/192669/1981/1994/23165/23225/23264/23279/23369/23511/23636/26523/27161/3020/3181/3692/4087/4088/4343/4927/4928/51490/51593/5431/5433/5434/5435/5436/5437/5438/5441/54487/5460/5511/55706/55746/5604/5605/56339/57472/57510/5901/5903/5936/652/7157/7175/79670/79902/8021/8087/81929/8351/8352/8353/8355/8357/8363/8364/8365/8370/8480/84872/8575/8737/9818	70
ACC	GO:0006352	DNA-templated transcription, initiation	107/4600	237/14477	9.66358e-06	0.00031469	0.000285915	10001/10062/10155/1019/1025/10413/10891/11176/112950/126382/1385/1499/171568/1810/1870/1871/2063/2068/2071/22938/22976/23064/2516/25885/25937/2649/2958/2960/2961/2962/2963/2965/2968/2972/29959/3146/4150/4306/4853/4929/51586/51773/5241/5431/5433/5434/5435/5436/5437/5438/5441/5442/5469/55011/5702/5704/5706/57106/5728/581/6097/6257/64425/6597/6598/6662/6722/6873/6875/6877/6878/6882/7003/7004/7019/70…	107
ACC	GO:1902402	signal transduction involved in mitotic DNA damage checkpoint	34/4600	57/14477	1.29618e-05	0.000413207	0.000375424	1017/10498/10769/11200/144455/1647/1869/2033/25904/2810/28984/3276/4194/4582/4849/5111/51512/5325/55367/5591/57060/57472/581/60561/6154/6790/7027/7157/79733/835/891/9125/983/995	34
ACC	GO:1902403	signal transduction involved in mitotic DNA integrity checkpoint	34/4600	57/14477	1.29618e-05	0.000413207	0.000375424	1017/10498/10769/11200/144455/1647/1869/2033/25904/2810/28984/3276/4194/4582/4849/5111/51512/5325/55367/5591/57060/57472/581/60561/6154/6790/7027/7157/79733/835/891/9125/983/995	34
ACC	GO:0045814	negative regulation of gene expression, epigenetic	47/4600	87/14477	1.36601e-05	0.000433189	0.000393579	100124700/10933/126961/151507/1786/1788/2146/22823/22880/23347/23512/25842/26147/29028/3005/3006/3007/3008/3009/3020/3146/3159/341567/3720/51535/5252/54454/55183/55506/58487/5987/7290/8318/8351/8352/8353/8355/8357/8363/8364/8365/8370/84444/84759/8520/8971/9355	47
ACC	GO:0060147	regulation of posttranscriptional gene silencing	54/4600	104/14477	1.50212e-05	0.00046658	0.000423917	10762/126374/126961/129401/1660/1981/1994/23165/23225/23279/23369/23511/23636/26523/27161/3020/4927/4928/5431/5433/5434/5435/5436/5437/5438/5441/5460/55706/55746/5604/5605/57510/5903/652/7015/7157/7175/79902/8021/8087/81929/8351/8352/8353/8355/8357/8363/8364/8365/8370/8480/84872/8737/9818	54
ACC	GO:1901796	regulation of signal transduction by p53 class mediator	83/4600	177/14477	1.71555e-05	0.000527467	0.000479237	1017/10419/10524/10919/1111/11198/11200/116028/1460/147746/149628/1763/200734/2033/22974/23028/26155/29997/3066/3090/3190/387893/399473/4194/4282/4487/4582/4839/53615/5366/5457/54971/5563/5564/55702/5600/56950/5810/5883/5982/5983/5984/5985/6117/6118/6119/6125/6135/6154/6201/624/641/64844/672/6749/6790/6794/6873/6875/6877/6878/6882/7157/7159/7161/7291/7862/79813/79915/80237/80279/8148/83596/83860/…	83
ACC	GO:0031062	positive regulation of histone methylation	24/4600	36/14477	1.77909e-05	0.000541506	0.000491991	1499/1786/22823/22938/22976/23476/26053/26097/26147/3009/3720/4000/4089/4297/5252/54623/55183/55904/56254/57343/672/7936/80312/94104	24
ACC	GO:0006275	regulation of DNA replication	52/4600	100/14477	2.03435e-05	0.000604023	0.000548792	1017/10919/10926/11124/11200/114799/144455/146059/157570/1660/1763/23063/23560/26271/27101/2956/29980/3265/50485/51053/5111/54617/5518/56897/57418/57695/58525/5879/5982/5983/5984/5985/63922/641/675/7126/7157/7270/79075/79733/79915/81620/8317/84083/84893/890/8914/90381/9126/91603/983/990	52
ACC	GO:0060964	regulation of gene silencing by miRNA	52/4600	100/14477	2.03435e-05	0.000604023	0.000548792	10762/126374/126961/129401/1660/1981/1994/23165/23225/23279/23369/23511/23636/26523/27161/3020/4927/4928/5431/5433/5434/5435/5436/5437/5438/5441/5460/55706/55746/5604/5605/5903/652/7157/7175/79902/8021/8087/81929/8351/8352/8353/8355/8357/8363/8364/8365/8370/8480/84872/8737/9818	52
ACC	GO:0006368	transcription elongation from RNA polymerase II promoter	44/4600	81/14477	2.12231e-05	0.000627066	0.000569728	1025/11198/123169/2068/2071/2146/22916/23476/25920/26610/29072/2962/2963/2965/2968/3192/4298/4300/4686/51497/5431/5433/5434/5435/5436/5437/5438/5441/54623/55193/55250/55677/55795/6749/6827/6829/6830/7936/79577/80237/8178/8812/905/9150	44
ACC	GO:0061013	regulation of mRNA catabolic process	85/4600	183/14477	2.13436e-05	0.000627564	0.00057018	10213/10236/10492/11340/149041/1660/167227/1869/1981/1994/23016/23198/23369/23404/23435/2475/26058/26135/26986/27161/27254/3183/3184/3192/328/3315/340719/342977/4343/4670/4904/51010/51013/51441/51594/5436/54890/55147/55544/5578/55795/56339/56829/5685/5686/5687/5688/5690/5691/56915/5692/5693/5695/5700/5702/5704/5706/57060/5707/5708/5710/5711/5715/5717/5719/6233/6418/678/7311/7316/7514/79675/79882/…	85
ACC	GO:0042274	ribosomal small subunit biogenesis	37/4600	65/14477	2.39165e-05	0.000699819	0.000635829	25926/25983/26284/27341/28987/3921/51077/55127/55226/55813/5822/6169/6193/6194/6201/6202/6204/6209/6217/6218/6223/6227/6229/6232/65095/6838/705/79954/83732/84946/85395/8602/8780/90121/91695/9277/9790	37
ACC	GO:0072431	signal transduction involved in mitotic G1 DNA damage checkpoint	33/4600	56/14477	2.47066e-05	0.000710823	0.000645827	1017/10498/10769/11200/144455/1647/1869/2033/25904/2810/28984/3276/4194/4582/4849/5111/51512/5325/55367/5591/57060/57472/581/6154/6790/7027/7157/79733/835/891/9125/983/995	33
ACC	GO:1902400	intracellular signal transduction involved in G1 DNA damage checkpoint	33/4600	56/14477	2.47066e-05	0.000710823	0.000645827	1017/10498/10769/11200/144455/1647/1869/2033/25904/2810/28984/3276/4194/4582/4849/5111/51512/5325/55367/5591/57060/57472/581/6154/6790/7027/7157/79733/835/891/9125/983/995	33
ACC	GO:0006271	DNA strand elongation involved in DNA replication	14/4600	17/14477	2.50943e-05	0.000716963	0.000651405	10714/1763/3978/4172/4173/4176/5111/51659/5425/5426/5983/5984/84296/9837	14
ACC	GO:0016441	posttranscriptional gene silencing	73/4600	153/14477	2.61106e-05	0.000742497	0.000674605	10762/126374/126961/129401/1660/192669/1981/1994/23165/23225/23264/23279/23369/23511/23636/26058/26523/27161/3020/3181/3692/4087/4088/4343/4927/4928/51490/51593/5431/5433/5434/5435/5436/5437/5438/5441/54487/5460/5511/55706/55746/5604/5605/56339/57472/57510/5901/5903/5936/652/7015/7157/7175/7247/79670/79902/8021/8087/81929/8351/8352/8353/8355/8357/8363/8364/8365/8370/8480/84872/8575/8737/9818	73
ACC	GO:1902275	regulation of chromatin organization	80/4600	171/14477	2.67857e-05	0.000758135	0.000688812	10155/1025/10270/10474/10856/10891/11011/1111/11143/1499/1786/22823/22880/22938/22976/23028/23476/25842/26053/26097/26147/26155/2625/26993/29028/3005/3006/3007/3008/3009/3159/3192/341567/3670/3720/4000/4089/4288/4297/4302/4582/51535/5252/5253/54454/54623/54880/55011/55183/55209/55611/55677/55818/55904/56254/56848/57343/5927/6418/64324/6598/672/6830/6871/7157/7175/7290/7291/7936/80312/8318/891/897…	80
ACC	GO:0044783	G1 DNA damage checkpoint	36/4600	63/14477	2.73888e-05	0.000771599	0.000701046	1017/10498/10769/11200/144455/1647/1869/2033/25904/26058/2810/28984/3276/4194/4582/4849/5111/51322/51512/5325/55367/5591/57060/57472/581/6118/6154/6790/7027/7157/79733/835/891/9125/983/995	36
ACC	GO:0006284	base-excision repair	26/4600	41/14477	3.01648e-05	0.000838112	0.000761476	10038/10721/1763/2074/2237/27343/3159/328/3978/4595/4913/5111/5424/5426/5428/55247/6117/6118/6119/6188/6996/7157/7507/79661/8091/8930	26
ACC	GO:0019985	translesion synthesis	26/4600	41/14477	3.01648e-05	0.000838112	0.000761476	10459/10714/124739/199990/353497/5111/51455/51514/5424/5425/5427/55666/5980/5982/5983/5984/5985/6117/6118/6119/6233/7311/7316/7353/83932/9768	26
ACC	GO:0031060	regulation of histone methylation	35/4600	61/14477	3.13322e-05	0.000866571	0.000787333	1499/1786/22823/22938/22976/23028/23476/26053/26097/26147/2625/3009/3720/4000/4089/4297/4302/5252/54623/54880/55011/55183/55677/55818/55904/56254/57343/64324/6598/672/6830/7936/80312/90780/94104	35
ACC	GO:0000724	double-strand break repair via homologous recombination	64/4600	131/14477	3.22983e-05	0.000889231	0.000807921	10213/10459/10635/10721/10933/1111/116028/119392/135458/142/2187/2237/23028/23347/2521/253714/25788/27343/29072/3014/353497/375757/4171/4172/4173/4174/4175/4176/4796/51444/51659/54617/55010/55135/55183/56893/57599/5888/5889/5890/5892/5980/6117/6118/6119/641/64110/6421/64210/672/675/7516/7517/7528/79000/80198/8317/8318/84296/8438/84893/8914/9401/9985	64
ACC	GO:0006353	DNA-templated transcription, termination	41/4600	75/14477	3.29071e-05	0.000893804	0.000812076	10419/10898/10914/1477/1479/1660/2068/2071/22916/23064/25885/25888/2965/2968/29894/4150/4686/51585/51692/53981/5434/5435/5437/5441/55339/64425/6606/6634/6635/6637/7270/7343/79101/79869/8106/8189/84172/9013/9014/9015/9533	41
ACC	GO:0006379	mRNA cleavage	16/4600	21/14477	3.69328e-05	0.000989833	0.000899324	10898/11052/1479/2081/22916/27161/29894/4343/4686/51585/51692/53981/5438/6038/64852/79869	16
ACC	GO:0051383	kinetochore organization	16/4600	21/14477	3.69328e-05	0.000989833	0.000899324	10051/10403/1058/10592/1062/1063/201254/23126/387103/51112/55839/64105/64946/80152/81620/83540	16
ACC	GO:0000245	spliceosomal complex assembly	33/4600	57/14477	4.08558e-05	0.00107593	0.000977547	10181/10291/10713/10907/11168/1653/22889/23020/23064/23451/27316/4686/51631/55015/56853/57461/58155/6426/6431/6433/6606/6631/6632/6633/6635/6637/6732/6936/7536/7919/8175/8487/8683	33
ACC	GO:0042255	ribosome assembly	33/4600	57/14477	4.08558e-05	0.00107593	0.000977547	22868/22907/26284/27341/29997/3692/387338/3921/4839/51116/51154/54475/56342/5822/6122/6125/6128/6134/6135/6136/6147/6169/6175/6193/6204/6209/6223/6232/65003/83939/84154/84231/91695	33
ACC	GO:0032786	positive regulation of DNA-templated transcription, elongation	21/4600	31/14477	4.17976e-05	0.00109597	0.000995753	10189/1025/11198/123169/2074/23476/2962/2963/3150/54623/6827/6829/6830/7919/79577/80237/8178/8563/8812/905/9984	21
ACC	GO:0000027	ribosomal large subunit assembly	19/4600	27/14477	4.32885e-05	0.00112032	0.00101788	22868/22907/29997/4839/51154/54475/56342/6122/6125/6128/6134/6135/6136/6147/6169/6175/65003/84154/84231	19
ACC	GO:0000725	recombinational repair	64/4600	132/14477	4.34221e-05	0.00112032	0.00101788	10213/10459/10635/10721/10933/1111/116028/119392/135458/142/2187/2237/23028/23347/2521/253714/25788/27343/29072/3014/353497/375757/4171/4172/4173/4174/4175/4176/4796/51444/51659/54617/55010/55135/55183/56893/57599/5888/5889/5890/5892/5980/6117/6118/6119/641/64110/6421/64210/672/675/7516/7517/7528/79000/80198/8317/8318/84296/8438/84893/8914/9401/9985	64
ACC	GO:0006360	transcription by RNA polymerase I	36/4600	64/14477	4.35515e-05	0.00112032	0.00101788	11176/1663/2068/2071/2074/23160/2475/25885/25926/2965/2968/29997/468/4691/5434/5435/5437/5441/5457/5469/55011/55127/55506/64425/64768/6597/6598/7270/7343/79101/84128/84172/9013/9014/9015/9533	36
ACC	GO:0000380	alternative mRNA splicing, via spliceosome	39/4600	71/14477	4.40212e-05	0.00112032	0.00101788	10084/10179/10181/10521/10657/146713/1660/23028/23543/27316/29890/3178/3191/3192/4116/4670/55234/56853/5725/58517/5936/6421/6426/6427/6428/6429/6431/6432/6433/6434/64783/79005/8241/83759/84872/84991/8683/9904/9939	39
ACC	GO:0009301	snRNA transcription	39/4600	71/14477	4.40212e-05	0.00112032	0.00101788	10208/1025/22916/23248/25896/26512/2958/2960/2961/2962/2963/4686/51593/5431/5433/5434/5435/5436/5437/5438/5441/54973/65123/6618/6621/6667/6877/6878/6882/7702/79871/80237/80789/81556/8178/84524/8812/905/92105	39
ACC	GO:0072422	signal transduction involved in DNA damage checkpoint	39/4600	71/14477	4.40212e-05	0.00112032	0.00101788	1017/10498/10769/1111/11200/144455/1647/1869/2033/25904/2810/28984/29086/3276/4194/4582/4849/5111/51512/51514/5325/5347/55367/5591/57060/57472/581/60561/6154/672/6790/7027/7157/79733/835/891/9125/983/995	39
ACC	GO:0000723	telomere maintenance	73/4600	155/14477	4.49395e-05	0.00113891	0.00103477	10574/10575/10576/10694/10714/11284/135458/142/1499/167227/1763/2067/220064/2237/23381/23649/2547/26277/26354/3104/3178/3181/3183/3184/3192/328/4609/4751/50485/5111/54107/5424/5425/5426/5427/55135/55183/55226/55505/5557/5591/5594/56252/5888/5889/5892/5982/5983/5984/5985/6117/6118/6119/641/64421/64858/675/7011/7015/7203/7517/7520/80119/8363/8364/8365/8370/8658/898/9156/9212/9401/9894	73
ACC	GO:0006977	DNA damage response, signal transduction by p53 class mediator resulting in cell cycle arrest	32/4600	55/14477	4.65562e-05	0.00117496	0.00106753	1017/10498/10769/11200/144455/1647/1869/2033/25904/2810/28984/3276/4194/4582/4849/5111/51512/5325/55367/57060/57472/581/6154/6790/7027/7157/79733/835/891/9125/983/995	32
ACC	GO:0031571	mitotic G1 DNA damage checkpoint	35/4600	62/14477	5.00705e-05	0.00124805	0.00113393	1017/10498/10769/11200/144455/1647/1869/2033/25904/26058/2810/28984/3276/4194/4582/4849/5111/51512/5325/55367/5591/57060/57472/581/6118/6154/6790/7027/7157/79733/835/891/9125/983/995	35
ACC	GO:0060218	hematopoietic stem cell differentiation	43/4600	81/14477	5.46295e-05	0.00135415	0.00123033	1021/10213/10413/121340/2068/23198/25/2625/4297/51441/54517/5610/56339/5685/5686/5687/5688/5690/5691/5692/5693/5695/5700/5702/5704/5706/5707/5708/5710/5711/5715/5717/5719/6422/6722/6929/6938/7157/7161/7520/865/8861/9861	43
ACC	GO:1901992	positive regulation of mitotic cell cycle phase transition	40/4600	74/14477	5.75892e-05	0.00141796	0.0012883	1019/11065/113130/11331/1543/1981/23476/26271/27085/28984/29766/328/5087/51433/51514/51529/55904/55920/57504/57521/5889/5890/6868/7015/7480/81620/8317/8318/8451/8452/891/898/9510/9700/9787/983/990/993/994/995	40
ACC	GO:0000731	DNA synthesis involved in DNA repair	29/4600	49/14477	6.81669e-05	0.00166487	0.00151263	1032/10459/10714/124739/199990/353497/5111/51455/51514/5424/5425/5426/5427/55666/56897/5980/5982/5983/5984/5985/6117/6118/6119/6233/7311/7316/7353/83932/9768	29
ACC	GO:0032784	regulation of DNA-templated transcription, elongation	29/4600	49/14477	6.81669e-05	0.00166487	0.00151263	10189/1025/11198/123169/2074/2146/23476/25920/2962/2963/3150/3192/51497/5457/54623/57805/6827/6829/6830/7919/7936/79577/80237/8178/8563/8812/8861/905/9984	29
ACC	GO:0042795	snRNA transcription by RNA polymerase II	38/4600	70/14477	7.74279e-05	0.00186103	0.00169086	1025/22916/23248/25896/26512/2958/2960/2961/2962/2963/4686/51593/5431/5433/5434/5435/5436/5437/5438/5441/54973/65123/6618/6621/6667/6877/6878/6882/7702/79871/80237/80789/81556/8178/84524/8812/905/92105	38
ACC	GO:1902750	negative regulation of cell cycle G2/M phase transition	50/4600	99/14477	7.83461e-05	0.0018701	0.0016991	10213/1111/135458/22809/23194/23198/29086/29980/29997/4998/51514/5347/5685/5686/5687/5688/5690/5691/5692/5693/5695/5700/5702/5704/5706/5707/5708/5710/5711/5715/5717/5719/60561/60672/63967/641/672/6790/80279/8091/84446/84936/90381/91603/9212/9344/983/9861/990/9978	50
ACC	GO:0006997	nucleus organization	58/4600	119/14477	8.0682e-05	0.00191644	0.0017412	10208/10783/129401/1639/165324/1861/221035/23165/23198/23353/23399/23435/23481/23760/26135/26993/27348/2852/29082/3020/3148/3267/341567/4000/4926/4928/51280/5347/55135/5518/55706/55746/5578/5579/55818/5819/6223/6314/6732/7175/7341/7443/7536/79188/79607/79643/80346/81565/81929/84172/8815/8882/891/90780/9133/9221/9519/983	58
ACC	GO:0010972	negative regulation of G2/M transition of mitotic cell cycle	45/4600	87/14477	8.47109e-05	0.00199647	0.00181392	10213/135458/23194/23198/29980/29997/4998/5685/5686/5687/5688/5690/5691/5692/5693/5695/5700/5702/5704/5706/5707/5708/5710/5711/5715/5717/5719/60561/60672/63967/641/672/6790/80279/8091/84446/84936/90381/91603/9212/9344/983/9861/990/9978	45
ACC	GO:0042276	error-prone translesion synthesis	15/4600	20/14477	8.95383e-05	0.0020859	0.00189517	10459/5111/51455/5427/5980/5982/5983/5984/5985/6117/6118/6119/6233/7311/7316	15
ACC	GO:0070987	error-free translesion synthesis	15/4600	20/14477	8.95383e-05	0.0020859	0.00189517	5111/51455/55666/5982/5983/5984/5985/6117/6118/6119/6233/7311/7316/7353/83932	15
ACC	GO:0006378	mRNA polyadenylation	26/4600	43/14477	9.77091e-05	0.00224176	0.00203678	1025/10914/11052/123169/1479/26986/29894/3297/51585/51692/53981/54623/55149/55339/56254/64852/64895/6626/6829/7936/79577/79869/79882/80336/8189/9810	26
ACC	GO:0045540	regulation of cholesterol biosynthetic process	26/4600	43/14477	9.77091e-05	0.00224176	0.00203678	10613/10654/1581/1595/1717/2194/2222/2224/22937/31/3156/3157/3422/3837/4047/4800/4802/5447/5901/6309/6319/6667/6713/6721/8720/9453	26
ACC	GO:0106118	regulation of sterol biosynthetic process	26/4600	43/14477	9.77091e-05	0.00224176	0.00203678	10613/10654/1581/1595/1717/2194/2222/2224/22937/31/3156/3157/3422/3837/4047/4800/4802/5447/5901/6309/6319/6667/6713/6721/8720/9453	26
ACC	GO:0006301	postreplication repair	30/4600	52/14477	9.91476e-05	0.00226618	0.00205896	10459/10714/124739/199990/353497/4436/5111/51455/51514/5424/5425/5427/55339/55666/56852/5980/5982/5983/5984/5985/6117/6118/6119/6233/672/7311/7316/7353/83932/9768	30
ACC	GO:0031507	heterochromatin assembly	32/4600	57/14477	0.000120275	0.00271831	0.00246975	10155/1029/11176/126961/1786/1788/22880/23347/23378/3020/3070/3159/4152/51535/5253/53615/57343/57673/6839/7175/80312/8091/8351/8352/8353/8355/8357/8363/8364/8365/8370/9869	32
ACC	GO:0051493	regulation of cytoskeleton organization	195/4600	494/14477	0.000141473	0.00315038	0.00286231	10092/10093/10094/10095/10096/10109/10152/10163/10174/10263/10274/10395/10432/10456/10460/10552/10615/1072/10733/10769/10787/11013/11064/11078/1111/11113/11170/11186/11211/116985/126731/132851/1499/152185/157922/1613/1627/1639/171024/171177/1778/1894/2011/2039/2042/220134/221150/22809/22919/22974/22994/23077/23116/23187/23191/23271/23299/23332/23406/23636/24139/2475/25/25802/25886/25999/26146/265…	195
ACC	GO:0030330	DNA damage response, signal transduction by p53 class mediator	52/4600	106/14477	0.000149697	0.00330919	0.0030066	1017/10397/10498/10524/10769/11200/144455/149628/1647/1869/200734/2033/22976/23028/2305/25904/2810/28984/3090/3276/387893/399473/4194/4282/4487/4582/4849/5111/51512/5325/5366/55367/55702/56950/57060/57472/581/6154/64844/672/675/6790/7023/7027/7157/7291/79733/835/891/9125/983/995	52
ACC	GO:0090329	regulation of DNA-dependent DNA replication	30/4600	53/14477	0.000159384	0.00351051	0.00318951	1017/10926/11200/144455/26271/2956/29980/50485/51053/54617/56897/57418/58525/5982/5983/5984/5985/63922/641/675/79075/79733/81620/8317/84083/84893/8914/90381/9126/91603	30
ACC	GO:0045292	mRNA cis splicing, via spliceosome	20/4600	31/14477	0.00017867	0.00389281	0.00353686	11168/22916/23020/28960/4686/55015/55660/5936/6426/6427/6428/6429/6431/6432/6433/6631/83759/8683/9092/9904	20
ACC	GO:0034502	protein localization to chromosome	42/4600	82/14477	0.000191188	0.00413581	0.00375764	10403/10498/10574/10575/10576/1058/10694/10856/113130/157570/2146/23063/26277/26354/27085/29072/3009/4436/51112/51535/5347/54908/55011/55135/55166/55506/55719/55920/57082/6117/6118/675/7015/7203/7272/7520/81620/83903/8658/9184/9212/983	42
ACC	GO:0034501	protein localization to kinetochore	13/4600	17/14477	0.000197218	0.00423599	0.00384865	10403/27085/51112/54908/55166/55920/57082/7272/81620/83903/9184/9212/983	13
ACC	GO:1902036	regulation of hematopoietic stem cell differentiation	37/4600	70/14477	0.000198886	0.00425672	0.00386749	1021/10213/10413/23198/25/2625/4297/51441/54517/5610/56339/5685/5686/5687/5688/5690/5691/5692/5693/5695/5700/5702/5704/5706/5707/5708/5710/5711/5715/5717/5719/6929/6938/7161/865/8861/9861	37
ACC	GO:0000132	establishment of mitotic spindle orientation	18/4600	27/14477	0.000204841	0.0043534	0.00395534	10120/10121/10253/10403/1058/126353/1639/29899/4085/4926/5080/5347/54820/54908/55755/56647/81565/89958	18
ACC	GO:0071897	DNA biosynthetic process	82/4600	185/14477	0.000213998	0.00452817	0.00411413	1032/10459/10574/10575/10576/1063/10694/10714/10721/11232/11284/124739/1499/167227/199990/23381/23649/26277/27000/27343/286826/28984/3178/3181/3183/3184/3192/353497/3978/4221/4609/4751/4880/4931/50507/5111/51455/51514/54107/5424/5425/5426/5427/5428/5478/55135/55226/55505/55666/5594/56897/5980/5982/5983/5984/5985/6117/6118/6119/6233/63922/659/7011/7015/7027/7083/7157/7203/7298/7311/7316/7353/7520/…	82
ACC	GO:0006297	nucleotide-excision repair, DNA gap filling	16/4600	23/14477	0.000220661	0.00458531	0.00416604	10714/3978/5111/5424/5425/5426/5982/5983/5984/5985/6117/6118/6119/6233/7311/7316	16
ACC	GO:0006335	DNA replication-dependent nucleosome assembly	16/4600	23/14477	0.000220661	0.00458531	0.00416604	10036/25842/4678/55723/79711/8208/8351/8352/8353/8355/8357/8363/8364/8365/8370/8520	16
ACC	GO:0034723	DNA replication-dependent nucleosome organization	16/4600	23/14477	0.000220661	0.00458531	0.00416604	10036/25842/4678/55723/79711/8208/8351/8352/8353/8355/8357/8363/8364/8365/8370/8520	16
ACC	GO:0006293	nucleotide-excision repair, preincision complex stabilization	15/4600	21/14477	0.000221052	0.00458531	0.00416604	142/1642/2067/2068/2071/2073/2965/2968/6117/6118/6119/7507/8451/9557/9978	15
ACC	GO:0006295	nucleotide-excision repair, DNA incision, 3'-to lesion	15/4600	21/14477	0.000221052	0.00458531	0.00416604	142/1642/2067/2068/2071/2073/2965/2968/6117/6118/6119/7507/8451/9557/9978	15
ACC	GO:2001252	positive regulation of chromosome organization	75/4600	167/14477	0.000238787	0.00493629	0.00448492	10155/1025/10270/10574/10575/10576/10694/10856/10891/11143/11284/1499/1663/1786/2067/2237/22823/22880/22938/22976/23028/23476/26053/26097/26147/2625/26354/26993/3009/3178/3181/3184/3192/3670/3720/4000/4089/4297/4582/4751/4926/51433/51529/51535/5252/54623/55011/55183/55719/55904/5594/56254/56848/57343/6421/6598/672/6871/7157/7175/7203/7520/7936/80312/81620/8452/8658/891/8986/9212/94104/9700/9787/9…	75
ACC	GO:0006513	protein monoubiquitination	35/4600	66/14477	0.000269741	0.00553838	0.00503196	10277/123169/1642/23429/29089/29128/329/4591/51322/51514/54623/54880/54926/55658/56254/56852/56970/57599/57697/59349/6015/6045/7251/79577/84108/84333/8452/84541/84678/84759/84861/867/90850/9810/9978	35
ACC	GO:1902653	secondary alcohol biosynthetic process	35/4600	66/14477	0.000269741	0.00553838	0.00503196	10613/10654/11161/1581/1595/1717/1727/2194/2222/2224/22937/31/3156/3157/335/3422/3837/39/3930/4047/47/4800/4802/51478/5447/5563/5901/6309/6319/6667/6713/6721/8720/91734/9453	35
ACC	GO:0043631	RNA polyadenylation	26/4600	45/14477	0.000276411	0.00565616	0.00513897	1025/10914/11052/123169/1479/26986/29894/3297/51585/51692/53981/54623/55149/55339/56254/64852/64895/6626/6829/7936/79577/79869/79882/80336/8189/9810	26
ACC	GO:0006362	transcription elongation from RNA polymerase I promoter	19/4600	30/14477	0.000368849	0.00749704	0.00681152	2068/2071/2074/25885/2965/2968/5434/5435/5437/5441/5457/64425/7343/79101/84172/9013/9014/9015/9533	19
ACC	GO:0090501	RNA phosphodiester bond hydrolysis	65/4600	143/14477	0.000401176	0.00809123	0.00735138	10535/10556/10557/10799/10898/10940/11052/11340/114034/116461/122651/129563/1479/167227/192669/2021/2081/2237/22916/23016/23404/246243/25996/26523/27161/283/283989/284131/28960/28987/29894/328/3669/4343/4686/51010/51013/51077/51585/51692/53981/54059/5438/54487/54913/5511/56915/57472/6038/6227/64852/65095/7247/79002/79033/79042/79869/80153/81875/8602/8909/90806/9156/9692/9941	65
ACC	GO:0050685	positive regulation of mRNA processing	18/4600	28/14477	0.000403426	0.00809123	0.00735138	10262/123169/22916/22938/26528/27316/29896/3297/4686/4928/494115/54623/56853/6434/6625/79577/891/9588	18
ACC	GO:0050686	negative regulation of mRNA processing	18/4600	28/14477	0.000403426	0.00809123	0.00735138	1025/27316/3181/3190/56254/56853/5725/6429/6431/6432/6433/6829/79171/7936/79882/8241/8683/9810	18
ACC	GO:0045910	negative regulation of DNA recombination	23/4600	39/14477	0.000410853	0.00821298	0.007462	10459/10721/116028/2187/23347/2956/3005/3006/3007/3008/3009/341567/4292/4436/55010/55183/56893/641/64110/84083/84893/8971/9984	23
ACC	GO:0000381	regulation of alternative mRNA splicing, via spliceosome	32/4600	60/14477	0.000426159	0.00849094	0.00771454	10179/10181/10521/10657/146713/23543/27316/29890/3178/3191/3192/4116/55234/56853/5725/58517/5936/6426/6427/6428/6429/6431/6432/6434/64783/8241/83759/84872/84991/8683/9904/9939	32
ACC	GO:0006695	cholesterol biosynthetic process	34/4600	65/14477	0.000459257	0.00906097	0.00823245	10613/10654/1581/1595/1717/1727/2194/2222/2224/22937/31/3156/3157/335/3422/3837/39/3930/4047/47/4800/4802/51478/5447/5563/5901/6309/6319/6667/6713/6721/8720/91734/9453	34
ACC	GO:0070828	heterochromatin organization	34/4600	65/14477	0.000459257	0.00906097	0.00823245	10155/1029/11176/126961/1786/1788/22880/23347/23378/3020/3070/3159/4017/4152/50809/51535/5253/53615/57343/57673/6839/7175/80312/8091/8351/8352/8353/8355/8357/8363/8364/8365/8370/9869	34
ACC	GO:0022616	DNA strand elongation	16/4600	24/14477	0.000466711	0.00917815	0.00833892	10714/1763/3978/4172/4173/4176/5111/51659/5425/5426/5983/5984/64858/7015/84296/9837	16
ACC	GO:0030397	membrane disassembly	12/4600	16/14477	0.000480461	0.00938759	0.00852921	10783/1639/23399/26993/5347/5578/5579/7443/81565/891/9133/983	12
ACC	GO:0051081	nuclear envelope disassembly	12/4600	16/14477	0.000480461	0.00938759	0.00852921	10783/1639/23399/26993/5347/5578/5579/7443/81565/891/9133/983	12
ACC	GO:0031058	positive regulation of histone modification	42/4600	85/14477	0.000515012	0.0100303	0.00911315	1025/10270/10856/10891/11143/1499/1786/22823/22938/22976/23028/23476/26053/26097/26147/2625/26993/3009/3670/3720/4000/4089/4297/4582/5252/54623/55011/55183/55904/56254/56848/57343/6598/672/6871/7157/7936/80312/891/8986/94104/9810	42
ACC	GO:0008630	intrinsic apoptotic signaling pathway in response to DNA damage	49/4600	103/14477	0.000567726	0.0110215	0.0100137	1032/11200/1869/2033/2074/220042/22938/22954/23028/25/26471/27141/27429/2810/2956/29965/3090/3190/4170/4282/4292/4436/4582/4776/54541/5591/57007/57646/578/57805/581/5883/6154/6188/6387/64112/64844/666/672/675/7157/7161/7507/79915/80237/835/83596/842/84893	49
ACC	GO:0075733	intracellular transport of virus	30/4600	56/14477	0.000578137	0.0111878	0.0101648	10762/129401/23165/23225/23279/23511/23636/3837/3838/3839/4927/4928/55706/55746/5901/5903/6233/7175/7251/7311/7316/7514/79720/79902/8021/81929/8480/93343/9397/9818	30
ACC	GO:1905269	positive regulation of chromatin organization	47/4600	98/14477	0.000582101	0.0112286	0.0102019	10155/1025/10270/10856/10891/11143/1499/1786/22823/22880/22938/22976/23028/23476/26053/26097/26147/2625/26993/3009/3670/3720/4000/4089/4297/4582/51535/5252/54623/55011/55183/55904/56254/56848/57343/6598/672/6871/7157/7175/7936/80312/891/8986/94104/9810/9869	47
ACC	GO:0010332	response to gamma radiation	29/4600	54/14477	0.00067338	0.0129072	0.011727	10206/10413/11011/11200/142/2002/2074/2177/23028/2547/2625/3014/3265/3297/3309/4221/4609/50507/54107/5428/5591/578/581/6154/675/7157/7516/7520/867	29
ACC	GO:0016126	sterol biosynthetic process	36/4600	71/14477	0.000684308	0.0130753	0.0118797	10613/10654/10826/11161/1581/1595/1717/1727/2194/2222/2224/22937/31/3156/3157/335/3422/3837/39/3930/4047/47/4800/4802/51478/5447/5563/5901/6309/6319/6667/6713/6721/8720/91734/9453	36
ACC	GO:0006294	nucleotide-excision repair, preincision complex assembly	18/4600	29/14477	0.000748617	0.0142143	0.0129146	142/1642/2068/2071/2073/2965/2968/5887/6117/6118/6119/6233/7311/7316/7507/8451/9557/9978	18
ACC	GO:0010390	histone monoubiquitination	18/4600	29/14477	0.000748617	0.0142143	0.0129146	123169/1642/23429/29128/4591/51322/54623/54880/56254/56970/6015/6045/79577/84108/84333/84678/84759/9810	18
ACC	GO:0097064	ncRNA export from nucleus	22/4600	38/14477	0.00077762	0.0147189	0.013373	10762/129401/22916/23165/23225/23279/23511/23636/4927/4928/55706/55746/5901/5903/6741/7175/7248/79902/8021/81929/8480/9818	22
ACC	GO:1903312	negative regulation of mRNA metabolic process	35/4600	69/14477	0.0008001	0.0150972	0.0137168	1025/10492/1660/1869/1994/23435/2475/26986/27316/3181/3183/3184/3190/3192/4904/51594/55544/56254/56853/5725/6429/6431/6432/6433/6829/79171/7936/79882/8241/8313/8531/8683/90806/9704/9810	35
ACC	GO:0016574	histone ubiquitination	25/4600	45/14477	0.000807232	0.0151845	0.013796	1025/123169/1642/23028/23326/23429/23512/29128/4591/51322/54623/54880/55611/56254/56970/57332/6015/6045/79577/84108/84333/84678/84759/9320/9810	25
ACC	GO:0006361	transcription initiation from RNA polymerase I promoter	21/4600	36/14477	0.000890697	0.0166511	0.0151285	11176/2068/2071/25885/2965/2968/5434/5435/5437/5441/55011/64425/6597/6598/7343/79101/84172/9013/9014/9015/9533	21
ACC	GO:0051031	tRNA transport	21/4600	36/14477	0.000890697	0.0166511	0.0151285	10762/129401/23165/23225/23279/23511/23636/4927/4928/55706/55746/5901/5903/6741/7175/79902/8021/81929/8480/9804/9818	21
ACC	GO:0046822	regulation of nucleocytoplasmic transport	47/4600	100/14477	0.00101103	0.0186135	0.0169115	10155/10541/10657/11052/11142/11261/1660/1894/22916/23435/23636/26993/2737/2810/29072/2932/3429/3843/4088/51496/51512/51684/5501/5566/55677/55929/5594/5663/57510/5784/5901/5905/5936/64328/652/6608/6830/6934/7157/7175/7514/7531/8021/8536/8882/9221/9818	47
ACC	GO:0006409	tRNA export from nucleus	20/4600	34/14477	0.00101796	0.0186263	0.0169232	10762/129401/23165/23225/23279/23511/23636/4927/4928/55706/55746/5901/5903/6741/7175/79902/8021/81929/8480/9818	20
ACC	GO:0071431	tRNA-containing ribonucleoprotein complex export from nucleus	20/4600	34/14477	0.00101796	0.0186263	0.0169232	10762/129401/23165/23225/23279/23511/23636/4927/4928/55706/55746/5901/5903/6741/7175/79902/8021/81929/8480/9818	20
ACC	GO:0070734	histone H3-K27 methylation	14/4600	21/14477	0.00107027	0.0194091	0.0176343	10919/2146/22823/23512/26147/2625/3006/3007/3008/5252/57343/57673/6830/79813	14
ACC	GO:0071459	protein localization to chromosome, centromeric region	14/4600	21/14477	0.00107027	0.0194091	0.0176343	10403/1058/27085/51112/54908/55166/55920/57082/7272/81620/83903/9184/9212/983	14
ACC	GO:1901836	regulation of transcription of nucleolar large rRNA by RNA polymerase I	10/4600	13/14477	0.00107818	0.0194662	0.0176862	1663/2475/25926/29997/4691/55011/55506/64768/6597/6598	10
ACC	GO:0070897	transcription preinitiation complex assembly	23/4600	41/14477	0.00108256	0.0194662	0.0176862	10001/11176/1385/1810/2958/2972/3146/55011/5702/5704/5706/64425/6597/6598/6878/6882/7157/7343/7480/9013/9014/9328/9519	23
ACC	GO:0043161	proteasome-mediated ubiquitin-dependent protein catabolic process	159/4600	408/14477	0.00108306	0.0194662	0.0176862	1017/10206/10213/10277/10399/10524/10613/10755/10769/10869/10952/11011/11065/11124/11253/118424/119504/122809/130617/1454/149603/1499/1601/1642/165324/197131/23194/23198/23392/23429/246184/25852/25937/26268/26271/27252/27338/285671/28951/2931/2932/29882/29979/29997/3077/329/3300/3309/3429/4085/4130/4287/5094/51035/51283/51322/51377/51433/51434/51465/51529/5347/54461/54788/54850/54926/550/55139/55…	159
ACC	GO:0009411	response to UV	61/4600	137/14477	0.00113039	0.0202567	0.0184045	10277/1032/10714/10856/1111/142/150678/163859/1642/1965/2033/2067/2068/2071/2073/2074/2237/22954/23028/26155/2956/3150/4157/4221/4436/4609/468/4776/5111/51435/51455/51514/5424/54617/55872/56339/56852/57646/578/57805/581/5970/6154/6738/675/6794/7157/7391/7398/7507/7528/836/8372/83932/84083/842/84236/84446/9212/9768/993	61
ACC	GO:0045116	protein neddylation	11/4600	15/14477	0.00114989	0.0204248	0.0185572	140739/150678/4738/55208/6125/6135/84259/9039/9040/9616/9978	11
ACC	GO:0042790	nucleolar large rRNA transcription by RNA polymerase I	12/4600	17/14477	0.00116025	0.0204303	0.0185622	1663/2475/25926/29997/4691/55011/55506/64425/64768/6597/6598/9014	12
ACC	GO:0006356	regulation of transcription by RNA polymerase I	19/4600	32/14477	0.00116031	0.0204303	0.0185622	1663/23160/2475/25926/29997/468/4691/5441/5457/5469/55011/55127/55506/64768/6597/6598/7343/84128/9013	19
ACC	GO:0061647	histone H3-K9 modification	25/4600	46/14477	0.00123884	0.0217497	0.0197609	10919/1111/1786/200186/23028/2625/3009/3720/4000/4089/4297/51742/55011/55183/55209/55818/56848/57343/57673/6598/672/6839/79723/79813/9869	25
ACC	GO:1904837	beta-catenin-TCF complex assembly	18/4600	30/14477	0.00131827	0.0230773	0.0209672	10524/123169/1499/2033/4221/4609/51176/51339/6597/6934/7015/7088/7090/79577/8313/8607/9070/90780	18
ACC	GO:0031440	regulation of mRNA 3'-end processing	17/4600	28/14477	0.00149172	0.0259637	0.0235896	1025/10914/11052/123169/22916/3297/4686/54623/56254/6626/6829/7936/79577/79869/79882/891/9810	17
ACC	GO:0010498	proteasomal protein catabolic process	177/4600	463/14477	0.00163497	0.0282137	0.0256339	1017/10206/10213/10277/10399/10524/10613/10755/10769/10869/10952/11011/11065/11124/11253/114881/118424/119504/122809/130617/1454/149603/1499/1601/1642/165324/1861/197131/23194/23198/23392/23429/246184/25852/25937/26268/26271/26471/27252/27338/285671/28951/2931/2932/29882/29954/29979/29997/3077/329/3300/3309/337867/3429/4085/4130/4287/5094/51035/51283/51322/51377/51433/51434/51465/51529/51608/5310…	177
ACC	GO:0001701	in utero embryonic development	137/4600	349/14477	0.00167015	0.0284726	0.0258692	10087/10155/10161/102/10454/10672/10733/11232/113026/123920/133/144455/1499/1603/1627/2016/2021/2068/2116/22846/23764/2551/25912/25988/26005/26097/2625/26469/27022/2707/27341/2737/28982/29072/29924/3276/3294/3297/3479/3491/3688/3726/398/4010/405/4087/4088/4089/4436/4487/4627/4628/4678/4751/4838/4849/4863/50861/51176/51639/5310/5335/53615/54475/5460/54663/5469/54880/54892/55224/55627/55723/55845/5…	137
ACC	GO:0006369	termination of RNA polymerase II transcription	20/4600	35/14477	0.00167054	0.0284726	0.0258692	10898/10914/1477/1479/22916/23064/25888/29894/4150/4686/51585/51692/53981/55339/6634/6635/6637/79869/8106/8189	20
ACC	GO:0071326	cellular response to monosaccharide stimulus	52/4600	115/14477	0.00167348	0.0284726	0.0258692	10399/10497/10891/111/150/1581/177/2021/2081/222546/2281/25874/26056/26137/2626/2852/2901/29085/3156/3383/3480/3651/3799/388581/4221/4830/4831/50507/5076/5105/5106/51092/5127/5428/54795/55011/5563/5566/56652/5879/5894/6434/65010/6597/6598/65985/6722/7447/7776/91355/9448/9854	52
ACC	GO:0071331	cellular response to hexose stimulus	52/4600	115/14477	0.00167348	0.0284726	0.0258692	10399/10497/10891/111/150/1581/177/2021/2081/222546/2281/25874/26056/26137/2626/2852/2901/29085/3156/3383/3480/3651/3799/388581/4221/4830/4831/50507/5076/5105/5106/51092/5127/5428/54795/55011/5563/5566/56652/5879/5894/6434/65010/6597/6598/65985/6722/7447/7776/91355/9448/9854	52
ACC	GO:0010971	positive regulation of G2/M transition of mitotic cell cycle	16/4600	26/14477	0.00167955	0.0284958	0.0258902	1019/23476/26271/5087/51514/55920/57504/5889/5890/7480/8317/891/983/993/994/995	16
ACC	GO:0000018	regulation of DNA recombination	43/4600	92/14477	0.00185802	0.0312611	0.0284027	10189/10459/10635/10721/1111/116028/142/2068/2187/22976/23028/23347/2521/29072/2956/3005/3006/3007/3008/3009/341567/3838/4292/4436/51010/55010/55135/55183/56893/5888/6118/641/64110/64210/6830/7037/7468/79915/84083/84893/8914/8971/9984	43
ACC	GO:0008543	fibroblast growth factor receptor signaling pathway	43/4600	92/14477	0.00185802	0.0312611	0.0284027	10253/10817/1399/143282/1499/200734/2254/22916/23064/23543/2625/2817/2962/2963/3178/3185/3187/345193/4670/4686/51552/53834/5431/5433/5434/5435/5436/54361/5437/5438/5441/54845/5594/55959/5725/7072/7073/7474/79801/867/8862/9158/9702	43
ACC	GO:0090175	regulation of establishment of planar polarity	48/4600	105/14477	0.00187218	0.0313255	0.0284611	10213/115908/1173/1175/1601/161/1857/1951/22943/23198/25/2535/2719/387/4300/51339/5216/5685/5686/5687/5688/5690/5691/5692/5693/5695/5700/5702/5704/5706/5707/5708/5710/5711/5715/5717/5719/57216/5754/5879/6422/64750/7474/8322/8324/89958/9861/998	48
ACC	GO:0033119	negative regulation of RNA splicing	15/4600	24/14477	0.00187901	0.0313531	0.0284862	27316/3181/3190/56853/5725/58155/6207/6429/6431/6432/6433/79171/8241/8683/9991	15
ACC	GO:0034504	protein localization to nucleus	100/4600	246/14477	0.00189824	0.0315869	0.0286987	10155/10574/10575/10576/10694/10736/10762/11142/11143/11261/11331/1277/129401/142/1434/149628/163590/1861/1894/200576/2254/23353/23399/23435/23511/23636/2516/25885/26022/2634/2737/2932/29997/30000/3192/3837/3838/3839/3843/4000/400916/4088/4487/4771/4927/4928/4931/51068/51501/51512/51684/5347/54623/5469/54971/55035/55135/55705/55746/55916/55929/5594/5663/56957/5901/5903/5905/6135/6495/652/655/6608…	100
ACC	GO:0006370	7-methylguanosine mRNA capping	19/4600	33/14477	0.00192566	0.0319184	0.0289998	2068/2071/22916/2962/2963/2965/2968/4686/5431/5433/5434/5435/5436/5437/5438/5441/55421/6829/8731	19
ACC	GO:0071333	cellular response to glucose stimulus	51/4600	113/14477	0.00193762	0.0319787	0.0290546	10399/10497/10891/111/150/1581/177/2021/2081/222546/2281/25874/26056/26137/2626/2852/2901/29085/3156/3383/3480/3651/3799/388581/4221/4830/4831/50507/5076/5105/5106/51092/5127/5428/54795/55011/5563/5566/56652/5879/5894/6434/6597/6598/65985/6722/7447/7776/91355/9448/9854	51
ACC	GO:0006367	transcription initiation from RNA polymerase II promoter	77/4600	183/14477	0.00202696	0.0332719	0.0302296	10001/10062/10155/1019/1025/10413/10891/112950/126382/1385/1810/1870/1871/2063/2068/2071/22938/22976/2516/25937/2649/2958/2960/2961/2962/2963/2965/2968/29959/3146/4150/4306/4853/4929/51586/5241/5431/5433/5434/5435/5436/5437/5438/5441/5469/5702/5704/5706/5728/581/6097/6257/6662/6722/6873/6875/6877/6878/6882/7003/7004/7068/7101/7157/7421/7480/8013/8148/83860/8431/865/891/9441/9442/9794/983/9975	77
ACC	GO:0016925	protein sumoylation	37/4600	77/14477	0.00204885	0.0334497	0.0303912	10054/10055/10155/10362/10401/10762/129401/1499/23165/23225/23279/23511/23636/26354/405/4927/4928/53335/54795/55706/55746/57691/5903/5905/5970/6612/6613/7175/7341/79902/8021/81929/8480/8535/8554/9759/9818	37
ACC	GO:0000717	nucleotide-excision repair, DNA duplex unwinding	14/4600	22/14477	0.00208494	0.033793	0.0307031	142/1642/2068/2071/2965/2968/5887/6233/7311/7316/7507/8451/9557/9978	14
ACC	GO:1904666	regulation of ubiquitin protein ligase activity	14/4600	22/14477	0.00208494	0.033793	0.0307031	10459/11065/26271/27338/2801/4085/5347/5728/6125/6135/6201/84930/9349/991	14
ACC	GO:1903313	positive regulation of mRNA metabolic process	35/4600	72/14477	0.00208661	0.033793	0.0307031	10236/10262/123169/149041/22916/22938/26058/26528/26986/27161/27316/29896/3184/3297/340719/342977/4343/4686/4928/494115/51441/5436/54623/55147/56339/56829/56853/6434/6625/678/79577/8570/891/9567/9588	35
ACC	GO:0048706	embryonic skeletal system development	52/4600	116/14477	0.0021089	0.0340629	0.0309483	10265/10522/10736/1277/1280/1301/145258/1499/1745/1746/2131/2254/23314/257/25902/2737/28982/29072/3205/3207/3213/3215/3216/3217/3219/3221/3225/3227/3235/4087/4088/4323/4522/4838/5087/51478/54799/55959/579/64131/6474/6495/652/655/6664/6670/6899/7046/7289/7291/7474/9775	52
ACC	GO:0060071	Wnt signaling pathway, planar cell polarity pathway	47/4600	103/14477	0.0021725	0.0349041	0.0317125	10213/115908/1173/1175/1601/161/1857/1951/22943/23198/25/2535/2719/387/4300/51339/5216/5685/5686/5687/5688/5690/5691/5692/5693/5695/5700/5702/5704/5706/5707/5708/5710/5711/5715/5717/5719/57216/5754/5879/6422/64750/7474/8322/8324/9861/998	47
ACC	GO:0006363	termination of RNA polymerase I transcription	18/4600	31/14477	0.00221592	0.0355075	0.0322607	2068/2071/25885/2965/2968/5434/5435/5437/5441/64425/7270/7343/79101/84172/9013/9014/9015/9533	18
ACC	GO:0001838	embryonic epithelial tube formation	50/4600	111/14477	0.00224321	0.0358499	0.0325718	10395/10522/1072/115908/133/1499/1857/23513/25/2535/25902/2625/29072/2909/4036/4522/4838/5076/51098/51684/5216/54361/54910/5566/55764/57216/57534/5754/57619/6201/6385/6422/6491/6495/652/655/6662/6664/7042/7248/7289/7291/7474/7475/836/84678/8915/9355/9585/9839	50
ACC	GO:0046825	regulation of protein export from nucleus	21/4600	38/14477	0.00227431	0.0362512	0.0329365	10541/26993/2810/29072/2932/3429/51496/51512/5566/55677/57510/5784/5905/64328/6830/6934/7157/7175/7514/7531/8536	21
ACC	GO:0051496	positive regulation of stress fiber assembly	26/4600	50/14477	0.00231767	0.0367489	0.0333887	10174/2475/25/28984/29109/335/387/389/4088/4771/50507/51466/5217/54361/5879/6385/6422/7016/7046/7248/7984/8829/9270/961/9647/998	26
ACC	GO:0034770	histone H4-K20 methylation	8/4600	10/14477	0.00240431	0.0377278	0.034278	387893/51111/51742/57673/64324/672/7468/84787	8
ACC	GO:1901838	positive regulation of transcription of nucleolar large rRNA by RNA polymerase I	8/4600	10/14477	0.00240431	0.0377278	0.034278	1663/2475/25926/4691/55011/64768/6597/6598	8
ACC	GO:0048026	positive regulation of mRNA splicing, via spliceosome	12/4600	18/14477	0.00247519	0.0385069	0.0349859	10262/22938/26528/27316/29896/4686/4928/494115/56853/6434/6625/9588	12
ACC	GO:1902751	positive regulation of cell cycle G2/M phase transition	17/4600	29/14477	0.00254446	0.0394163	0.0358121	1019/23476/26271/5087/51514/55920/57504/5889/5890/7480/79915/8317/891/983/993/994/995	17
ACC	GO:0000394	RNA splicing, via endonucleolytic cleavage and ligation	11/4600	16/14477	0.00262262	0.0400835	0.0364184	10898/116461/1653/2081/283989/29894/339487/51637/79042/79074/83707	11
ACC	GO:0018027	peptidyl-lysine dimethylation	11/4600	16/14477	0.00262262	0.0400835	0.0364184	10919/29072/399818/55011/55818/56950/6598/6839/751071/79723/79813	11
ACC	GO:0051382	kinetochore assembly	11/4600	16/14477	0.00262262	0.0400835	0.0364184	1058/1062/1063/201254/23126/387103/51112/55839/64105/64946/80152	11
ACC	GO:0016584	nucleosome positioning	9/4600	12/14477	0.00264709	0.0400835	0.0364184	3005/3006/3007/3008/3009/341567/51773/54623/8971	9
ACC	GO:0000079	regulation of cyclin-dependent protein serine/threonine kinase activity	44/4600	96/14477	0.00266138	0.0400995	0.0364329	1019/1029/1031/1032/1033/11140/1163/1164/1647/219771/23560/245711/25793/2810/28984/2965/3843/4221/5310/5347/54619/56647/57018/5728/641/6868/7023/7128/79935/80279/836/84722/8812/8851/890/891/898/899/905/9088/9133/990/993/995	44
ACC	GO:0001841	neural tube formation	44/4600	96/14477	0.00266138	0.0400995	0.0364329	10395/10522/1072/115908/133/1857/23513/25/2535/25902/29072/2909/4036/4522/4838/5076/51098/51684/5216/54910/5566/55764/57216/57534/5754/57619/6201/6385/6422/6491/652/655/6664/7042/7248/7289/7291/7474/836/84678/8915/9355/9585/9839	44
ACC	GO:0006268	DNA unwinding involved in DNA replication	10/4600	14/14477	0.00269663	0.0403296	0.0366419	3159/4171/4173/4175/4176/56652/5888/6117/641/9401	10
ACC	GO:0043543	protein acylation	94/4600	232/14477	0.00285652	0.0423031	0.038435	10474/10524/10856/10891/10933/11091/1111/11143/11177/114799/122830/151507/157570/1810/200186/2033/22976/23326/23774/254887/25921/25999/26053/26122/26155/2625/26471/27154/283576/2932/29801/3066/3670/401647/4089/4297/4582/5105/51104/51176/51304/51773/53615/54107/5447/55011/55209/55257/55274/5563/55677/55689/55929/56848/57634/57673/58489/5977/60560/6418/64429/6598/672/675/6871/6877/7291/7862/79075/7…	94
ACC	GO:0045005	DNA-dependent DNA replication maintenance of fidelity	22/4600	41/14477	0.00296426	0.0435789	0.0395941	10189/1025/146956/1663/1763/201254/253714/29980/4796/50485/5111/5424/5426/57697/5888/641/675/84083/84893/8914/91603/9984	22
ACC	GO:0009452	7-methylguanosine RNA capping	19/4600	34/14477	0.00307542	0.0448863	0.040782	2068/2071/22916/2962/2963/2965/2968/4686/5431/5433/5434/5435/5436/5437/5438/5441/55421/6829/8731	19
ACC	GO:0036260	RNA capping	19/4600	34/14477	0.00307542	0.0448863	0.040782	2068/2071/22916/2962/2963/2965/2968/4686/5431/5433/5434/5435/5436/5437/5438/5441/55421/6829/8731	19
ACC	GO:0014020	primary neural tube formation	41/4600	89/14477	0.00325751	0.0473354	0.0430072	10395/10522/1072/115908/133/1857/23513/25/2535/25902/29072/2909/4036/4522/4838/5076/51684/5216/54910/5566/55764/57216/5754/57619/6201/6385/6422/6491/652/655/7042/7248/7289/7291/7474/836/84678/8915/9355/9585/9839	41
ACC	GO:0006282	regulation of DNA repair	52/4600	118/14477	0.00328302	0.0475723	0.0432224	10155/1025/10459/10635/10721/1111/116028/142/1660/1663/2074/2140/2187/23028/2305/23347/2521/29072/29086/3014/3146/3297/4862/5111/55010/55135/55183/55611/55719/5591/56893/56897/57332/5888/6118/6188/64110/64210/672/7291/7398/7468/79000/7913/8091/8313/83933/8451/84893/8505/8914/9320	52
ACC	GO:0016180	snRNA processing	15/4600	25/14477	0.00332542	0.0480717	0.0436761	11340/114034/203522/23016/23404/25896/26512/51010/54973/56915/64852/65123/80789/81556/92105	15
KIRC	GO:0016241	regulation of macroautophagy	111/6807	168/15004	4.39817e-08	9.03971e-05	8.83956e-05	10133/10193/10206/10241/10325/10542/10558/10670/11040/120892/140775/149371/153129/154/200576/201475/207/2081/22930/23256/23265/23367/23411/23545/245973/2475/25782/2597/26086/2629/26471/27131/27244/27429/2773/285180/28956/29082/29978/29979/3064/3162/340371/345611/3791/4534/4734/4943/5049/5071/51100/51322/51382/51606/523/526/527/528/529/5290/5305/535/54543/54832/55187/5562/5563/5564/5571/55737/5576…	111
KIRC	GO:0046395	carboxylic acid catabolic process	160/6807	267/15004	1.01668e-06	0.00113372	0.00110862	10007/10247/10327/10449/10455/10478/10840/10841/11001/11057/11112/112817/122970/125061/130013/131669/132789/1374/1376/137872/138199/1384/1428/144193/1491/1579/1592/1610/1629/1666/166785/1738/1743/18/1892/191/1962/197257/197322/207/208/2108/2109/2110/215/2166/224/225/23417/23576/2475/254013/2571/25828/26061/26275/2639/2653/27034/27165/2731/27349/2744/2746/2747/275/2805/2806/283927/2954/30/3030/303…	160
KIRC	GO:0072329	monocarboxylic acid catabolic process	83/6807	128/15004	6.57449e-06	0.00480962	0.00470313	10327/10449/10455/10478/11001/11057/112817/1374/1376/1384/1579/1592/1666/166785/18/1892/1962/197257/207/208/2108/2109/2110/215/2166/224/225/23417/2475/254013/26061/26275/2639/27349/283927/30/3030/3032/3033/3295/33/34/340665/3425/35/3712/38/3991/414328/4594/5095/51/5105/5106/51084/51102/51179/51302/51390/5191/5264/5465/54677/549/55289/55825/55862/56898/5825/5828/6342/64902/6652/7915/7920/80150/830…	83
KIRC	GO:0016239	positive regulation of macroautophagy	47/6807	66/15004	1.84615e-05	0.00813097	0.00795093	10133/10206/10241/10558/11040/140775/154/201475/22930/23367/23411/25782/26086/27244/2773/285180/3064/3162/345611/3791/5049/5071/51100/51322/5305/54543/54832/55187/5563/5595/57535/5899/60592/65018/664/665/6829/7248/7405/79443/7957/79837/8678/8767/9517/9531/9927	47
KIRC	GO:0006163	purine nucleotide metabolic process	224/6807	404/15004	2.41916e-05	0.00994437	0.00972419	100/100101267/10165/10249/10380/10654/107/10762/10846/10861/10891/10965/111/11163/112/11319/115/120892/122622/122970/131870/1329/134145/136/137964/1537/158/159/1622/168537/1716/1737/1738/1739/1740/1743/195827/1969/197322/201562/2023/204/205/215/2180/2181/2182/2203/221264/229/22978/230/23165/23279/23417/23433/23511/25830/2584/25874/25939/2597/26027/260425/26137/2639/2646/26471/271/27109/27115/2723…	224
KIRC	GO:0009150	purine ribonucleotide metabolic process	208/6807	376/15004	5.60276e-05	0.0183123	0.0179068	100101267/10165/10249/10380/10654/107/10762/10846/10861/10891/10965/111/11163/112/11319/115/120892/122622/122970/131870/1329/134145/137964/1537/158/159/1622/168537/1737/1738/1739/1740/1743/195827/1969/197322/201562/2023/204/205/215/2180/2181/2182/2203/221264/229/22978/230/23165/23279/23417/23433/23511/25830/2584/25874/2597/26027/260425/26137/2639/2646/26471/271/27109/27115/27233/27284/2773/2821/2…	208
KIRC	GO:0009062	fatty acid catabolic process	68/6807	106/15004	7.23357e-05	0.0205591	0.0201039	10449/10455/10478/11001/11057/1374/1376/1384/1579/1666/166785/1892/1962/207/208/2108/2109/2110/215/2166/224/225/23417/2475/254013/26061/26275/2639/27349/283927/30/3030/3032/3033/3295/33/34/35/3712/38/3991/4594/5095/51/5105/5106/51102/51179/51390/5191/5264/5465/54677/549/55289/55825/55862/56898/5825/5828/6342/7920/8309/83752/84129/84693/91452/9663	68
KIRC	GO:0007031	peroxisome organization	53/6807	79/15004	7.78764e-05	0.0205591	0.0201039	10455/10901/10965/11001/122970/1384/1610/1962/196743/2053/215/23417/26061/283927/30/3155/3295/3416/4843/51/51024/51179/51762/5189/5191/5192/5193/5264/54469/54677/55670/55825/57506/5824/5825/5828/5830/6342/65084/7314/7322/7323/8239/8309/83752/8443/847/8504/8528/8540/8799/8800/92960	53
KIRC	GO:0000266	mitochondrial fission	26/6807	33/15004	9.15388e-05	0.0209048	0.0204419	10891/113115/120892/125170/1723/23259/3791/4137/4600/4976/5071/51024/51537/54332/54471/54708/55737/56181/64423/65018/65084/664/6773/79594/91137/9650	26
KIRC	GO:0009259	ribonucleotide metabolic process	214/6807	391/15004	0.000104707	0.023058	0.0225474	100101267/10165/10249/10380/10654/107/10762/10846/10861/10891/10965/111/11163/112/11319/115/120892/122622/122970/131870/1329/134145/137964/139596/1537/158/159/1622/168537/1723/1737/1738/1739/1740/1743/195827/1969/197322/201562/2023/204/205/215/2180/2181/2182/2203/221264/229/22978/230/23165/23279/23417/23433/23511/25830/2584/25874/2597/26027/260425/26137/2639/2646/26471/271/27109/27115/27233/27284…	214
KIRC	GO:0006635	fatty acid beta-oxidation	48/6807	71/15004	0.000125531	0.0249685	0.0244157	10449/10455/10478/11001/1374/1376/1384/1666/1892/1962/207/208/2108/2109/2110/215/225/23417/2475/254013/26275/2639/27349/30/3030/3032/3033/3295/33/34/35/3712/38/51/51102/5191/5465/54677/549/55289/55862/56898/5825/5828/6342/8309/83752/84129	48
KIRC	GO:0072666	establishment of protein localization to vacuole	33/6807	45/15004	0.000130385	0.0251235	0.0245672	10490/137492/143187/155382/22878/22879/23230/27092/27183/30849/3312/3920/4074/4734/51028/51172/51520/54832/55048/55187/64089/6653/6845/7879/79158/79720/8031/8546/8678/9179/950/9570/9648	33
KIRC	GO:0006086	acetyl-CoA biosynthetic process from pyruvate	14/6807	15/15004	0.000134464	0.0251244	0.0245681	1737/1738/25874/2954/5160/5162/5163/5164/5166/51660/54704/55066/57546/8050	14
KIRC	GO:1903649	regulation of cytoplasmic transport	20/6807	24/15004	0.00015046	0.0257704	0.0251998	120892/1601/23011/23317/29934/4133/4478/5071/51652/55823/5594/5595/5604/5962/6653/6714/7430/80128/8898/8934	20
KIRC	GO:0006085	acetyl-CoA biosynthetic process	18/6807	21/15004	0.000162748	0.0271217	0.0265212	1737/1738/23417/25874/2954/38/47/5160/5162/5163/5164/5166/51660/54704/55066/57546/8050/84532	18
KIRC	GO:0007032	endosome organization	51/6807	77/15004	0.00017401	0.0282353	0.0276102	10015/10254/10564/1182/137492/144717/149371/155382/23317/23325/23603/257364/25978/27183/29082/29911/5071/51028/51361/51510/51534/51652/5289/55048/55300/55654/55823/57132/57617/57679/5869/5873/64400/653145/7251/7879/79102/79156/79643/79720/8027/84067/84376/8766/8867/9101/91782/92421/950/9525/9798	51
KIRC	GO:0006625	protein targeting to peroxisome	45/6807	67/15004	0.000255591	0.0366505	0.035839	10455/10901/10965/11001/122970/1384/1610/1962/196743/2053/23417/26061/283927/30/3155/3295/3416/4843/51/51179/51762/5189/5191/5192/5193/5264/54469/54677/55670/55825/5824/5828/5830/6342/7314/7322/7323/8239/8309/83752/8443/847/8504/8528/8540	45
KIRC	GO:0072662	protein localization to peroxisome	45/6807	67/15004	0.000255591	0.0366505	0.035839	10455/10901/10965/11001/122970/1384/1610/1962/196743/2053/23417/26061/283927/30/3155/3295/3416/4843/51/51179/51762/5189/5191/5192/5193/5264/54469/54677/55670/55825/5824/5828/5830/6342/7314/7322/7323/8239/8309/83752/8443/847/8504/8528/8540	45
KIRC	GO:0072663	establishment of protein localization to peroxisome	45/6807	67/15004	0.000255591	0.0366505	0.035839	10455/10901/10965/11001/122970/1384/1610/1962/196743/2053/23417/26061/283927/30/3155/3295/3416/4843/51/51179/51762/5189/5191/5192/5193/5264/54469/54677/55670/55825/5824/5828/5830/6342/7314/7322/7323/8239/8309/83752/8443/847/8504/8528/8540	45
KIRP	GO:0000280	nuclear division	36/216	376/14791	1.58748e-19	4.81324e-16	4.50008e-16	10615/1063/11004/11065/1164/146691/146909/151648/22974/23397/24137/259266/285643/286151/332/3832/3833/400629/4288/4605/4751/51203/5347/54443/7153/83540/8438/9055/9134/9212/9232/9319/9787/991/9928/995	36
KIRP	GO:0048285	organelle fission	37/216	415/14791	5.26475e-19	7.98136e-16	7.46209e-16	10615/1063/11004/11065/1164/125170/146691/146909/151648/22974/23397/24137/259266/285643/286151/332/3832/3833/400629/4288/4605/4751/51203/5347/54443/7153/83540/8438/9055/9134/9212/9232/9319/9787/991/9928/995	37
KIRP	GO:0090307	mitotic spindle assembly	11/216	56/14791	4.18033e-10	1.07575e-07	1.00576e-07	22974/24137/285643/332/3832/3833/4605/4751/5347/9212/991	11
KIRP	GO:0051783	regulation of nuclear division	16/216	176/14791	6.27892e-09	1.46444e-06	1.36916e-06	1063/11065/146691/286151/3832/4288/4751/51203/5347/54443/9212/9232/9319/9787/991/995	16
KIRP	GO:0051784	negative regulation of nuclear division	8/216	55/14791	1.22665e-06	0.000157938	0.000147662	1063/146691/286151/5347/9212/9232/9319/991	8
KIRP	GO:1901990	regulation of mitotic cell cycle phase transition	20/216	395/14791	1.41555e-06	0.000171679	0.000160509	1063/11065/22974/3161/4751/51512/5347/54443/5685/79733/8318/90381/9212/9319/93323/9787/983/991/9928/995	20
KIRP	GO:0000086	G2/M transition of mitotic cell cycle	15/216	239/14791	2.33938e-06	0.000262704	0.000245612	1063/22974/2305/3161/4751/5347/5685/890/90381/9133/9212/93323/983/9928/995	15
KIRP	GO:1902749	regulation of cell cycle G2/M phase transition	13/216	205/14791	1.00184e-05	0.000893405	0.00083528	1063/22974/3161/4751/51512/5347/5685/90381/9212/93323/983/9928/995	13
KIRP	GO:0010965	regulation of mitotic sister chromatid separation	7/216	57/14791	1.82849e-05	0.00145894	0.00136402	1063/5347/9212/9232/9319/9787/991	7
KIRP	GO:2000816	negative regulation of mitotic sister chromatid separation	6/216	39/14791	1.97402e-05	0.00149631	0.00139896	1063/5347/9212/9232/9319/991	6
KIRP	GO:0010389	regulation of G2/M transition of mitotic cell cycle	12/216	188/14791	2.07014e-05	0.00153089	0.00143129	1063/22974/3161/4751/5347/5685/90381/9212/93323/983/9928/995	12
KIRP	GO:0033048	negative regulation of mitotic sister chromatid segregation	6/216	42/14791	3.0602e-05	0.0020619	0.00192775	1063/5347/9212/9232/9319/991	6
KIRP	GO:0033047	regulation of mitotic sister chromatid segregation	7/216	68/14791	5.8535e-05	0.003622	0.00338635	1063/5347/9212/9232/9319/9787/991	7
KIRP	GO:0030071	regulation of mitotic metaphase/anaphase transition	6/216	51/14791	9.41823e-05	0.00549155	0.00513427	1063/5347/9212/9319/9787/991	6
KIRP	GO:1902099	regulation of metaphase/anaphase transition of cell cycle	6/216	52/14791	0.000105183	0.00600085	0.00561043	1063/5347/9212/9319/9787/991	6
KIRP	GO:0007094	mitotic spindle assembly checkpoint	5/216	34/14791	0.000124947	0.00653172	0.00610676	1063/5347/9212/9319/991	5
KIRP	GO:0007091	metaphase/anaphase transition of mitotic cell cycle	6/216	54/14791	0.00013024	0.006693	0.00625755	1063/5347/9212/9319/9787/991	6
KIRP	GO:0031145	anaphase-promoting complex-dependent catabolic process	7/216	79/14791	0.000152847	0.00745335	0.00696843	11065/5347/5685/9212/9232/983/991	7
KIRP	GO:0045841	negative regulation of mitotic metaphase/anaphase transition	5/216	36/14791	0.000165316	0.00759452	0.00710042	1063/5347/9212/9319/991	5
KIRP	GO:1902100	negative regulation of metaphase/anaphase transition of cell cycle	5/216	36/14791	0.000165316	0.00759452	0.00710042	1063/5347/9212/9319/991	5
KIRP	GO:0071459	protein localization to chromosome, centromeric region	4/216	21/14791	0.000217803	0.00985641	0.00921514	1058/57082/9212/983	4
KIRP	GO:1901991	negative regulation of mitotic cell cycle phase transition	11/216	219/14791	0.000380338	0.016242	0.0151853	1063/51512/5347/5685/79733/90381/9212/9319/983/991/995	11
KIRP	GO:0035722	interleukin-12-mediated signaling pathway	5/216	45/14791	0.000481622	0.0200038	0.0187024	3593/4001/6175/6627/6647	5
KIRP	GO:0000079	regulation of cyclin-dependent protein serine/threonine kinase activity	7/216	96/14791	0.000510005	0.0208964	0.0195369	1033/1164/5347/890/9133/9134/995	7
KIRP	GO:0006323	DNA packaging	10/216	192/14791	0.000526536	0.0212861	0.0199012	1058/11339/23397/4673/51203/55355/57082/7153/85236/983	10
KIRP	GO:0071349	cellular response to interleukin-12	5/216	47/14791	0.000590564	0.0235282	0.0219974	3593/4001/6175/6627/6647	5
KIRP	GO:0071103	DNA conformation change	13/216	308/14791	0.000609483	0.0235282	0.0219974	1058/11339/23397/4673/51203/54821/55355/57082/7153/8318/8438/85236/983	13
KIRP	GO:1904668	positive regulation of ubiquitin protein ligase activity	3/216	12/14791	0.000613037	0.0235282	0.0219974	11065/5347/991	3
KIRP	GO:0070671	response to interleukin-12	5/216	48/14791	0.000651495	0.0246917	0.0230852	3593/4001/6175/6627/6647	5
KIRP	GO:0043486	histone exchange	5/216	49/14791	0.000717014	0.026512	0.0247872	1058/11339/55355/57082/81611	5
KIRP	GO:0034508	centromere complex assembly	5/216	50/14791	0.000787336	0.0281369	0.0263063	1058/1063/11339/55355/57082	5
LGG	GO:0060333	interferon-gamma-mediated signaling pathway	61/5760	85/15105	2.96864e-10	1.83254e-06	1.714e-06	10346/10437/10475/11140/2209/2633/2634/3055/3105/3106/3107/3113/3115/3117/3118/3119/3120/3122/3123/3133/3134/3135/3136/3263/3326/3383/3459/3460/3659/3660/3661/3663/3665/4261/4281/4502/4684/4938/4939/4940/53840/54625/5580/567/5724/5771/6672/6737/6772/7376/7412/81603/818/83666/84166/85363/8638/8651/9021/9111/960	61
LGG	GO:0030198	extracellular matrix organization	174/5760	343/15105	1.09408e-06	0.00108077	0.00101086	101/10516/10609/10630/10631/10893/11005/11117/1277/1278/1282/1284/1288/1289/1290/1291/1292/1295/1296/1298/1299/1301/1306/1307/1308/1311/1404/140766/146206/1471/1514/1520/164656/165/169044/169611/1758/1803/1842/196264/2/2006/2022/2191/2200/22798/23122/23213/2331/2335/255743/2621/26585/285590/30008/302/3037/304/323/3339/3371/3381/3383/3385/3491/3569/3655/3672/3673/3674/3675/3676/3678/3683/3684/3685…	174
LGG	GO:0002283	neutrophil activation involved in immune response	225/5760	461/15105	1.40136e-06	0.00108077	0.00101086	1/100049587/10043/10092/101/10312/10383/10396/10450/10487/10493/10577/1075/10788/10875/10970/11025/11027/1116/1118/11240/11314/11333/114790/12/121260/124583/126014/1378/138050/1471/1476/150372/1508/1520/1522/1535/154664/1650/1654/1675/1729/175/1774/178/1915/1938/196527/1992/2171/2207/221/2212/2268/22918/22931/230/23071/23191/23218/23385/23406/23526/23593/23601/240/2495/2512/2517/2519/25797/25798/…	225
LGG	GO:0071346	cellular response to interferon-gamma	92/5760	163/15105	1.45942e-06	0.00108077	0.00101086	10096/10346/10437/10475/11093/11140/115362/1612/1613/163351/2209/2597/2633/2634/2635/2934/3055/3105/3106/3107/3113/3115/3117/3118/3119/3120/3122/3123/3133/3134/3135/3136/3263/3326/3383/3459/3460/3594/3659/3660/3661/3663/3665/3965/4261/4281/4360/4502/4641/4684/4938/4939/4940/51466/53840/54625/55614/5580/567/5724/5771/6362/6370/6376/65010/6672/6737/6770/6772/6812/6813/6814/7097/7098/7376/7412/7431/…	92
LGG	GO:0042119	neutrophil activation	229/5760	471/15105	1.62053e-06	0.00108077	0.00101086	1/100049587/10043/10092/101/10312/10383/10396/10450/10487/10493/10577/1075/10788/10875/10970/11025/11027/1116/1118/11240/11314/11333/114790/12/121260/124583/126014/1378/138050/1471/1476/150372/1508/1520/1522/1535/154664/1650/1654/1675/1729/175/1774/178/1915/1938/196527/1992/2150/2171/2207/221/2212/2268/22918/22931/230/23071/23191/23218/23385/23406/23526/23593/23601/240/2495/2512/2517/2519/25797/2…	229
LGG	GO:0002446	neutrophil mediated immunity	228/5760	471/15105	2.54988e-06	0.0013117	0.00122685	1/100049587/10043/10092/101/10312/10383/10396/10450/10487/10493/10577/1075/10788/10875/10970/11025/1116/1118/11240/11314/11333/114790/12/121260/124583/126014/1378/138050/1471/1476/150372/1508/1520/1522/1535/154664/1650/1654/1675/1729/175/1774/178/1915/1938/196527/1992/2150/2171/2207/221/2212/2268/22918/22931/230/23071/23191/23218/23385/23406/23526/23593/23601/240/2495/2512/2517/2519/25797/25798/2…	228
LGG	GO:0030199	collagen fibril organization	36/5760	52/15105	5.24901e-06	0.00249247	0.00233124	10609/11117/1277/1278/1289/1290/1301/1311/140766/165/2331/26585/302/304/4015/4017/4320/4921/50509/5345/5351/5352/538/5925/63894/6423/642658/7042/7046/7148/79709/84171/84695/871/8985/9508	36
LGG	GO:0060317	cardiac epithelial to mesenchymal transition	24/5760	31/15105	9.59083e-06	0.00370026	0.0034609	10252/10439/182/1942/2022/2253/23462/23493/3037/3516/4487/4488/51384/55273/57142/650/6591/6615/7042/7046/7048/7291/8751/9241	24
LGG	GO:0060337	type I interferon signaling pathway	49/5760	79/15105	1.39072e-05	0.00451837	0.00422609	10410/10581/11140/117854/1958/2537/26065/2634/3105/3106/3107/3133/3134/3135/3136/3326/3455/3654/3659/3660/3661/3663/3665/3669/4599/4600/4615/4938/4939/4940/51441/54739/5696/5770/5771/5777/58509/6041/6672/6772/6773/684/7297/79594/81030/84166/8638/8772/9636	49
LGG	GO:0071357	cellular response to type I interferon	49/5760	79/15105	1.39072e-05	0.00451837	0.00422609	10410/10581/11140/117854/1958/2537/26065/2634/3105/3106/3107/3133/3134/3135/3136/3326/3455/3654/3659/3660/3661/3663/3665/3669/4599/4600/4615/4938/4939/4940/51441/54739/5696/5770/5771/5777/58509/6041/6672/6772/6773/684/7297/79594/81030/84166/8638/8772/9636	49
LGG	GO:0050868	negative regulation of T cell activation	59/5760	101/15105	2.71199e-05	0.00727873	0.00680789	10385/10457/1051/10859/10875/11314/1493/1845/2267/2302/26191/2737/2796/29126/30009/301/3077/3135/3142/3566/3620/3659/3718/3958/3965/4092/441478/5074/51043/54900/57045/57162/5771/5777/634/6469/652/654346/6693/7040/79679/80149/80380/836/8379/84695/84807/84868/861/864/865/8651/8654/8764/9231/9306/941/942/972	59
LGG	GO:0048706	embryonic skeletal system development	64/5760	116/15105	0.000137526	0.0292741	0.0273804	10265/10522/10655/116039/1277/1301/157506/1745/1746/202018/2131/2138/23169/23213/23314/257/25902/27173/2737/3198/3200/3201/3202/3204/3205/3207/3212/3213/3214/3217/3221/3222/3223/3232/3233/3235/3236/4323/5125/5156/54799/55959/57453/57728/579/642658/6469/6474/652/6670/6899/6913/6935/7043/7046/7048/7289/7291/7703/79977/80199/860/9241/9742	64
LGG	GO:0051017	actin filament bundle assembly	77/5760	146/15105	0.000221302	0.0369215	0.0345332	10083/10163/10391/10395/10458/11346/118/120/134549/171024/1809/1902/2006/2041/2059/2185/221061/221692/23075/23122/2316/23671/2475/25794/27289/285590/29109/29984/339768/3693/389/390/3936/3984/408/4082/4233/4739/50507/5058/5071/5074/51466/5216/5217/5345/5358/55616/56907/57026/57175/5734/5829/585/5879/5962/6281/6376/6548/6624/7043/7046/7248/7454/7791/7984/79933/80115/81/8153/84501/8477/85462/87/9270…	77
LGG	GO:0042475	odontogenesis of dentin-containing tooth	45/5760	77/15105	0.000232517	0.0377717	0.0353284	10312/123041/133/1441/1495/1745/1746/1747/1758/2253/2308/256764/2736/2737/2775/29123/3065/3371/3655/3691/4038/4487/4488/4782/4982/5054/51176/5156/54757/55512/56975/581/5818/645811/6469/650/652/657/6608/682/6899/760/860/93/9464	45
LGG	GO:0061572	actin filament bundle organization	78/5760	149/15105	0.000275157	0.0424635	0.0397167	10083/10163/10391/10395/10458/11346/118/120/134549/144347/171024/1809/1902/2006/2041/2059/2185/221061/221692/23075/23122/2316/23671/2475/25794/27289/285590/29109/29984/339768/3693/389/390/3936/3984/408/4082/4233/4739/50507/5058/5071/5074/51466/5216/5217/5345/5358/55616/56907/57026/57175/5734/5829/585/5879/5962/6281/6376/6548/6624/7043/7046/7248/7454/7791/7984/79933/80115/81/8153/84501/8477/85462/…	78
LGG	GO:0042098	T cell proliferation	87/5760	170/15105	0.000343417	0.045606	0.0426558	100133941/10385/10457/1051/10859/11035/11119/1493/1503/1947/2000/2281/2302/23308/23385/2697/2796/29108/29126/301/3071/3109/3113/3115/3133/3135/3485/3569/3594/3606/3620/3659/3718/3958/3965/4179/4478/5074/51043/5294/54440/5532/5699/57045/57162/5777/5788/581/58515/5880/6188/6194/6304/6469/64926/652/654346/6556/6693/6850/7037/7040/7048/729230/7293/7412/7535/7784/79679/80380/80381/836/8379/8440/84433/…	87
LGG	GO:0034728	nucleosome organization	74/5760	141/15105	0.000352489	0.045606	0.0426558	10036/10467/1058/11339/121504/128312/23198/23270/23421/23522/25842/266812/3006/3008/3009/3014/3017/3148/373861/378708/4171/440689/4673/4674/4675/4678/4778/50809/54069/54623/55320/55355/55506/55723/55839/55929/57082/5757/5928/64105/64431/64946/653604/6594/6598/6601/6605/6662/6830/6944/7290/79019/79172/79682/79711/81611/8208/8289/8294/8344/8347/8348/8349/8351/8353/8357/8365/8370/83743/8520/85236/89…	74
LIHC	GO:0000280	nuclear division	130/2076	371/14523	2.72955e-24	5.03147e-21	4.65651e-21	10051/10201/10270/10403/10419/10460/10592/10615/1062/1063/10734/11004/1104/11065/1111/11130/113130/1164/124817/128866/145645/146909/146956/151246/151648/157777/2175/2177/22974/23212/23236/23383/23397/23636/24137/246184/25788/259266/26255/26271/27085/27175/27338/286151/29082/29127/29893/3304/332/3550/3832/3833/3837/4085/4288/440145/4439/4605/4733/4751/51143/51203/51433/51451/51547/5347/54443/54820…	130
LIHC	GO:0042254	ribosome biogenesis	109/2076	290/14523	2.61599e-23	3.6166e-20	3.34708e-20	10153/10171/10200/10248/10360/10528/10557/10885/10969/11056/114049/117246/118460/124995/14/1736/2091/22803/22984/23016/23076/23160/23212/23378/23404/23481/23560/25926/25983/26156/26284/26574/27043/27340/27341/285855/29889/29960/317781/387338/3921/4809/4869/5036/51018/51081/51096/51121/51154/51367/51504/51602/5393/5394/54433/54475/54555/54680/54853/54881/55003/55153/55226/55272/55299/55646/55651/5…	109
LIHC	GO:0034470	ncRNA processing	127/2076	368/14523	4.48288e-23	4.66594e-20	4.31822e-20	10171/10200/10248/10360/10528/10557/10785/10885/10898/10969/11056/112858/112970/114034/114049/117246/118460/126789/127253/131965/134637/1653/1736/2091/22803/22929/22984/23016/23076/23160/23212/23378/23404/23481/23560/24140/25926/25983/26156/27043/27340/27341/283989/285855/2926/29894/29960/317781/339175/339487/348180/387338/4234/4809/5036/51002/51018/51096/51154/51367/51504/51593/51602/51605/51654…	127
LIHC	GO:0034660	ncRNA metabolic process	146/2076	453/14523	5.0625e-23	4.66594e-20	4.31822e-20	10056/10171/10200/10248/10360/10528/10557/10785/10885/10898/10969/11056/112487/112858/112970/114034/114049/117246/118460/126789/127253/131405/131965/134637/162989/1653/1736/2091/22803/22929/22984/23016/23076/23160/23212/23378/23404/23438/23481/23560/24140/25926/25983/26156/27043/27340/27341/283989/285855/2926/29894/29960/3035/317781/3376/339175/339487/348180/387338/4137/4141/4234/4809/5036/51002/…	146
LIHC	GO:0048285	organelle fission	136/2076	410/14523	8.39175e-23	5.8008e-20	5.36851e-20	10005/10051/10201/10270/10403/10419/10460/10592/10615/1062/1063/10734/11004/1104/11065/1111/11130/113115/113130/1164/124817/128866/145645/146909/146956/151246/151648/157777/2175/2177/22974/23212/23236/23383/23397/23636/24137/246184/25788/259266/26255/26271/27085/27175/27338/286151/29082/29127/29893/3304/332/3550/3832/3833/3837/4085/4137/4288/440145/4439/4605/4733/4751/51143/51203/51433/51451/5153…	136
LIHC	GO:0006364	rRNA processing	87/2076	212/14523	8.35523e-22	5.13382e-19	4.75124e-19	10171/10200/10248/10360/10528/10557/10885/10969/11056/114049/117246/118460/1736/2091/22803/22984/23016/23076/23160/23212/23378/23404/23481/23560/25926/25983/26156/27043/27340/27341/285855/29960/317781/387338/4809/5036/51018/51096/51154/51367/51504/51602/5393/5394/54433/54555/54680/54853/54881/55226/55272/55646/55651/55661/55695/55759/55813/57050/57109/57602/57647/5822/6125/6155/6187/6202/6217/622…	87
LIHC	GO:0016072	rRNA metabolic process	89/2076	222/14523	1.88804e-21	1.04409e-18	9.66281e-19	10171/10200/10248/10360/10528/10557/10885/10969/11056/114049/117246/118460/162989/1736/2091/22803/22984/23016/23076/23160/23212/23378/23404/23481/23560/25926/25983/26156/27043/27340/27341/285855/29960/317781/387338/4137/4809/5036/51018/51096/51154/51367/51504/51602/5393/5394/54433/54555/54680/54853/54881/55226/55272/55646/55651/55661/55695/55759/55813/57050/57109/57602/57647/5822/6125/6155/6187/6…	89
LIHC	GO:0008380	RNA splicing	127/2076	410/14523	1.5411e-18	6.08733e-16	5.63369e-16	10084/10147/10189/10236/10262/10285/10419/10450/10465/10657/10713/10898/10907/10921/11168/11319/11325/1196/135295/1653/22826/22913/22927/22985/23020/23028/23076/23210/23435/23450/23658/25766/25980/26121/26528/283989/285672/29890/29894/3178/3184/3187/3191/339487/3550/4116/4670/4809/4904/5094/51329/51340/51593/51639/51645/51691/51692/51747/5411/5431/5433/5437/5438/54960/55015/5511/55119/55131/5518/…	127
LIHC	GO:0006260	DNA replication	93/2076	266/14523	1.26165e-17	4.65129e-15	4.30467e-15	1017/10189/10432/10535/10721/10919/10926/1111/11124/11143/11169/11177/11198/11232/116028/144455/146956/157570/157777/1763/2237/23560/23595/23649/253714/26057/26271/27000/27343/2956/29980/3159/3978/4171/4172/4175/4176/466/4673/4678/4796/4998/4999/50485/5111/51514/51659/54107/5422/5424/54962/5518/55388/5557/5810/5879/5888/5931/5982/5984/5985/6240/6241/63922/63967/64785/672/79733/79915/80010/80174/8…	93
LIHC	GO:0006397	mRNA processing	138/2076	473/14523	1.53188e-17	5.29456e-15	4.9e-15	10084/10147/10189/1022/10236/10262/10285/10419/10450/10465/10657/10713/10898/10907/10921/11052/11168/11319/11325/123169/135295/1653/22803/22826/22913/22927/22984/22985/23020/23028/23076/23210/23435/23450/23658/25766/25980/26121/26528/283989/285367/285672/2926/2965/2968/29890/29894/3178/3184/3187/3191/3550/4116/4670/4809/4904/5094/51329/51340/51593/51639/51645/51691/51692/51747/5411/5431/5433/5437…	138
LIHC	GO:0000377	RNA splicing, via transesterification reactions with bulged adenosine as nucleophile	103/2076	322/14523	2.62853e-16	7.65039e-14	7.08027e-14	10084/10189/10236/10262/10285/10419/10450/10465/10657/10713/10898/10907/10921/11168/11325/135295/1653/22826/22913/23020/23028/23210/23450/23658/25766/25980/26121/26528/29890/29894/3178/3184/3187/3191/3550/4116/4670/4809/4904/5094/51340/51593/51639/51645/51691/51692/51747/5411/5431/5433/5437/5438/54960/55015/55692/55696/55749/56339/5725/57461/57794/57819/58155/60625/6421/6427/6433/64783/65109/6625…	103
LIHC	GO:0000398	mRNA splicing, via spliceosome	103/2076	322/14523	2.62853e-16	7.65039e-14	7.08027e-14	10084/10189/10236/10262/10285/10419/10450/10465/10657/10713/10898/10907/10921/11168/11325/135295/1653/22826/22913/23020/23028/23210/23450/23658/25766/25980/26121/26528/29890/29894/3178/3184/3187/3191/3550/4116/4670/4809/4904/5094/51340/51593/51639/51645/51691/51692/51747/5411/5431/5433/5437/5438/54960/55015/55692/55696/55749/56339/5725/57461/57794/57819/58155/60625/6421/6427/6433/64783/65109/6625…	103
LIHC	GO:0000375	RNA splicing, via transesterification reactions	103/2076	325/14523	5.3252e-16	1.47242e-13	1.36269e-13	10084/10189/10236/10262/10285/10419/10450/10465/10657/10713/10898/10907/10921/11168/11325/135295/1653/22826/22913/23020/23028/23210/23450/23658/25766/25980/26121/26528/29890/29894/3178/3184/3187/3191/3550/4116/4670/4809/4904/5094/51340/51593/51639/51645/51691/51692/51747/5411/5431/5433/5437/5438/54960/55015/55692/55696/55749/56339/5725/57461/57794/57819/58155/60625/6421/6427/6433/64783/65109/6625…	103
LIHC	GO:1901990	regulation of mitotic cell cycle phase transition	118/2076	397/14523	8.23215e-16	2.1678e-13	2.00625e-13	1017/1019/10197/10213/1029/1031/1032/10403/10540/1062/1063/10733/11065/11190/113130/11319/144455/1453/1454/1869/203068/2146/219736/2273/22897/22919/22974/22994/23236/23354/246184/26057/26271/27085/2810/29980/3161/328/3550/4085/4751/4998/5111/51143/51433/51434/51451/51499/51512/51514/5347/54443/54801/54820/54908/55125/55142/5518/55367/55571/55795/5687/5690/5705/5707/5709/5715/5717/5718/5719/57472/…	118
LIHC	GO:0071103	DNA conformation change	94/2076	306/14523	8.6253e-14	1.90792e-11	1.76574e-11	10051/10155/10270/1029/1058/10592/10721/113130/11339/1161/1616/1653/1677/1763/1788/22880/22985/23378/23397/23421/2491/25/2547/25788/25842/2965/2968/3009/3014/3070/3148/3159/387103/401541/4171/4172/4175/4176/4673/4676/4678/4869/50485/51203/51535/51548/51659/54107/54821/54892/55166/55355/55723/55839/56852/56916/57673/5888/5931/5982/5984/5985/6233/63922/64105/64151/64946/6732/7153/7311/7314/7520/790…	94
LIHC	GO:0000086	G2/M transition of mitotic cell cycle	79/2076	239/14523	1.17334e-13	2.49559e-11	2.30962e-11	1017/1019/10197/10213/1022/10540/1063/10657/10733/11113/11190/1453/1454/203068/219736/219771/2273/22897/22919/22974/22994/2305/23236/23354/26271/29980/3161/4751/4998/51400/51451/51514/5347/54801/54820/55125/55142/5518/5687/5690/5705/5707/5709/5715/5717/5718/5719/57325/5885/5889/60561/63967/672/6790/7283/80028/80174/8317/84131/84930/84936/8655/8883/890/891/90381/9088/9133/91603/9662/9793/983/9833/…	79
LIHC	GO:0006261	DNA-dependent DNA replication	58/2076	150/14523	1.24109e-13	2.54194e-11	2.35251e-11	1017/10189/10721/10926/11169/11177/11232/144455/146956/157777/1763/2237/23595/23649/253714/26271/2956/29980/3159/3978/4171/4172/4175/4176/4796/4998/4999/50485/5111/51659/54107/5422/5424/54962/55388/5557/5888/5982/5984/5985/63922/64785/79733/79915/80174/81620/8317/8318/84296/8914/898/90381/9134/91603/92667/9400/9837/990	58
LIHC	GO:1902749	regulation of cell cycle G2/M phase transition	71/2076	205/14523	1.55191e-13	3.06501e-11	2.8366e-11	1017/1019/10197/10213/10540/1063/10733/1111/11190/1453/1454/203068/219736/2273/22897/22919/22974/22994/23354/26271/29980/3161/4751/4869/4998/51512/51514/51720/5347/54801/54820/55125/55142/5518/5687/5690/5705/5707/5709/5715/5717/5718/5719/5885/5889/60561/63967/672/6790/7283/79915/80174/8317/84131/84142/84936/8655/8883/891/90381/91603/9555/9662/9793/983/990/9928/993/994/995/9978	71
LIHC	GO:0006405	RNA export from nucleus	53/2076	131/14523	1.64888e-13	3.14424e-11	2.90993e-11	10189/10482/10657/10898/10921/11052/11097/11260/1977/23165/23212/23225/23511/23636/2733/29890/29894/3178/3267/348995/4116/4869/51692/53371/5433/55153/55308/55706/55795/57122/57510/5901/6059/6427/65083/65109/6830/7307/79023/7919/79902/8086/8106/81608/8189/8480/84946/8563/8683/8888/91746/9295/9631	53
LIHC	GO:0010965	regulation of mitotic sister chromatid separation	31/2076	57/14523	1.43214e-12	2.19992e-10	2.03598e-10	10403/10460/1062/1063/246184/26255/26271/3550/4085/51143/51433/51451/5347/54908/55795/5885/699/701/7272/7517/7756/81620/84101/891/9184/9232/9319/9700/9787/990/991	31
LIHC	GO:0033047	regulation of mitotic sister chromatid segregation	34/2076	68/14523	2.86824e-12	4.06702e-10	3.76394e-10	10403/10460/1062/1063/246184/26255/26271/3550/4085/51143/51433/51451/5347/54908/55719/55795/5885/699/701/7272/7517/7756/81620/84101/84250/891/9184/9232/9319/9555/9700/9787/990/991	34
LIHC	GO:0051783	regulation of nuclear division	61/2076	175/14523	5.84377e-12	7.91072e-10	7.3212e-10	10201/10403/10419/10460/1062/1063/1104/11065/1111/113130/128866/23236/23636/246184/26255/26271/27085/286151/3304/3550/3832/4085/4288/4733/4751/51143/51203/51433/51451/5347/54443/54908/55719/55795/5810/5885/5902/64793/6790/699/701/7272/7517/7756/81620/84101/84250/891/9088/9184/9232/9319/9555/9585/9587/9700/9735/9787/990/991/995	61
LIHC	GO:0010389	regulation of G2/M transition of mitotic cell cycle	64/2076	188/14523	5.86509e-12	7.91072e-10	7.3212e-10	1017/1019/10197/10213/10540/1063/10733/11190/1453/1454/203068/219736/2273/22897/22919/22974/22994/23354/26271/29980/3161/4751/4998/51514/5347/54801/54820/55125/55142/5518/5687/5690/5705/5707/5709/5715/5717/5718/5719/5885/5889/60561/63967/672/6790/7283/80174/8317/84131/84936/8655/8883/891/90381/91603/9662/9793/983/990/9928/993/994/995/9978	64
LIHC	GO:0007091	metaphase/anaphase transition of mitotic cell cycle	29/2076	54/14523	1.15275e-11	1.44879e-09	1.34083e-09	10403/10460/1062/1063/246184/26271/3550/4085/51143/51433/51451/5347/54908/55795/5885/699/701/7272/7517/7756/81620/84101/891/9184/9319/9700/9787/990/991	29
LIHC	GO:0030071	regulation of mitotic metaphase/anaphase transition	28/2076	51/14523	1.2824e-11	1.56876e-09	1.45185e-09	10403/1062/1063/246184/26271/3550/4085/51143/51433/51451/5347/54908/55795/5885/699/701/7272/7517/7756/81620/84101/891/9184/9319/9700/9787/990/991	28
LIHC	GO:2000816	negative regulation of mitotic sister chromatid separation	24/2076	39/14523	1.3333e-11	1.56876e-09	1.45185e-09	10403/1063/26255/26271/3550/4085/51143/51451/5347/54908/55795/5885/699/701/7272/7517/7756/81620/84101/891/9184/9232/9319/991	24
LIHC	GO:1902099	regulation of metaphase/anaphase transition of cell cycle	28/2076	52/14523	2.40076e-11	2.60318e-09	2.40918e-09	10403/1062/1063/246184/26271/3550/4085/51143/51433/51451/5347/54908/55795/5885/699/701/7272/7517/7756/81620/84101/891/9184/9319/9700/9787/990/991	28
LIHC	GO:0051784	negative regulation of nuclear division	29/2076	56/14523	3.77498e-11	3.9388e-09	3.64528e-09	10201/10403/1063/1111/26255/26271/27085/286151/3550/4085/51143/51451/5347/54908/55795/5810/5885/699/701/7272/7517/7756/81620/84101/891/9184/9232/9319/991	29
LIHC	GO:0033044	regulation of chromosome organization	90/2076	322/14523	9.2826e-11	8.85927e-09	8.19906e-09	10155/10270/10403/10460/10574/10575/10576/1062/1063/10694/11011/1111/11143/113130/116028/1736/1789/2237/22823/22880/23028/246184/25842/26147/26255/26271/2648/3009/3159/3178/3184/3550/3720/4085/4137/4171/4216/4288/4297/4302/4751/51143/51433/51451/51535/51548/5347/5394/54908/55226/55719/55795/5588/5885/6421/6598/6714/672/6830/6950/699/701/7153/7203/7272/7422/7517/7520/7756/79035/7936/79829/81620/83…	90
LIHC	GO:0006302	double-strand break repair	71/2076	231/14523	9.30406e-11	8.85927e-09	8.19906e-09	10213/10635/10721/1111/113130/116028/119392/146956/157570/157777/1653/1763/2187/2237/23028/2305/253714/2547/25788/27343/286257/3014/375757/4171/4172/4175/4176/4255/4436/4796/51548/51659/51720/5422/55010/55719/56893/56916/5885/5888/5889/5892/6421/64210/64858/672/7468/7516/7517/7520/78996/79000/79035/79913/80010/8317/8318/8365/84142/84250/84296/8438/84501/84515/8914/9025/9112/9319/93973/9400/9907	71
LIHC	GO:0051168	nuclear export	62/2076	190/14523	9.45202e-11	8.85927e-09	8.19906e-09	10189/10482/10657/10898/10921/11052/11097/11260/1434/1977/23165/23212/23225/23511/23636/2733/2810/29890/29894/3178/3267/348995/4116/4869/51512/51692/53371/5433/54535/55153/55308/55341/55696/55706/55795/57122/57510/5901/5905/6059/6427/65083/65109/6830/7307/79023/7919/79902/8086/8106/81608/8189/8480/84946/8563/8683/8888/9147/91746/9295/9531/9631	62
LIHC	GO:0045841	negative regulation of mitotic metaphase/anaphase transition	22/2076	36/14523	1.16915e-10	1.0599e-08	9.80914e-09	10403/1063/26271/3550/4085/51143/51451/5347/54908/55795/5885/699/701/7272/7517/7756/81620/84101/891/9184/9319/991	22
LIHC	GO:1902100	negative regulation of metaphase/anaphase transition of cell cycle	22/2076	36/14523	1.16915e-10	1.0599e-08	9.80914e-09	10403/1063/26271/3550/4085/51143/51451/5347/54908/55795/5885/699/701/7272/7517/7756/81620/84101/891/9184/9319/991	22
LIHC	GO:0033048	negative regulation of mitotic sister chromatid segregation	24/2076	42/14523	1.2123e-10	1.0813e-08	1.00072e-08	10403/1063/26255/26271/3550/4085/51143/51451/5347/54908/55795/5885/699/701/7272/7517/7756/81620/84101/891/9184/9232/9319/991	24
LIHC	GO:0006310	DNA recombination	77/2076	263/14523	2.01096e-10	1.73759e-08	1.6081e-08	10189/10213/10432/10635/10721/1111/116028/118460/119392/124817/146956/157777/2187/2237/23028/253714/2547/25788/27301/27343/2956/29893/30009/3009/3014/3148/328/3329/375757/3838/4171/4172/4175/4176/4436/4439/4796/51548/51659/54891/55010/56893/56916/5885/5888/5889/5892/6421/64210/672/6830/6929/7153/7374/7468/7516/7517/7520/79000/79035/79913/79915/80010/8317/8318/83444/83695/84296/8438/84515/8914/902…	77
[truncated: 340 more rows]

## Sheet: 3_manual group_Cox regression
select	manual classification	ID	Description	count	ACC	CESC	HNSC	KICH	KIRP	LIHC	MESO	PAAD	PRAD	UVM
[truncated: 213 more rows]

## Sheet: 4_manual group_logrank test
select	manual classification	ID	Description	count	ACC	KIRC	KIRP	LGG	LIHC	MESO	PRAD	UVM
[truncated: 181 more rows]
